# Supplementary material for: PTPN2 targets TAK1 for dephosphorylation to improve cellular senescence and promote adipose tissue browning in T2DM
Source: Front Pharmacol. 2023 May 12;14:1124633. doi: 10.3389/fphar.2023.1124633 (PMC10213551; doi:10.3389/fphar.2023.1124633)
Supplement: Supplementary file 1 [file Table2.XLSX]

## Sheet: Sheet1
t_id	class_code	chr	strand	start	end	t_name	num_exons	length	gene_id	gene_name	GO	KEGG	KO_ENTRY	EC	Description	trans_type	Reactome	FPKM.P1	FPKM.P2	FPKM.P3	FPKM.C1	FPKM.C2	FPKM.C3	fc	log2(fc)	pval	qval	regulation	significant
73587	0	chr2	+	14229392	14332057	ENSMUST00000028045	30	5374	ENSMUSG00000026712	Mrc1	GO:0004888(transmembrane signaling receptor activity);GO:0005537(mannose binding);GO:0005768(endosome);GO:0005886(plasma membrane);GO:0006897(endocytosis);GO:0006898(receptor-mediated endocytosis);GO:0009986(cell surface);GO:0010008(endosome membrane);GO:0016020(membrane);GO:0016021(integral component of membrane);GO:0030246(carbohydrate binding);GO:0038023(signaling receptor activity);GO:0038024…	04145(Phagosome);05152(Tuberculosis)	K06560	NA	mannose receptor, C type 1 [Source:MGI Symbol;Acc:MGI:97142]	protein_coding	R_MMU_1236975(Antigen_processing_Cross_presentation);R_MMU_1236978(Cross_presentation_of_soluble_exogenous_antigens_(endosomes));R_MMU_168256(Immune_System);R_MMU_1280218(Adaptive_Immune_System);R_MMU_983169(Class_I_MHC_mediated_antigen_processing_&_presentation)	2.39607	3.36285	2.37269	19.1016	16.9095	17.2043	0.152806	-2.71023	6.46876e-74	5.5751e-69	down	yes
74482	0	chr2	-	26409433	26445216	ENSMUST00000091252	30	8737	ENSMUSG00000026924	Sec16a	GO:0000139(Golgi membrane);GO:0005515(protein binding);GO:0005737(cytoplasm);GO:0005783(endoplasmic reticulum);GO:0005789(endoplasmic reticulum membrane);GO:0005794(Golgi apparatus);GO:0005829(cytosol);GO:0006888(endoplasmic reticulum to Golgi vesicle-mediated transport);GO:0007029(endoplasmic reticulum organization);GO:0007030(Golgi organization);GO:0012507(ER to Golgi transport vesicle membrane…	NA	K20353	NA	SEC16 homolog A, endoplasmic reticulum export factor [Source:MGI Symbol;Acc:MGI:2139207]	protein_coding	R_MMU_5653656(Vesicle_mediated_transport);R_MMU_199977(ER_to_Golgi_Anterograde_Transport);R_MMU_948021(Transport_to_the_Golgi_and_subsequent_modification);R_MMU_597592(Post_translational_protein_modification);R_MMU_392499(Metabolism_of_proteins);R_MMU_446203(Asparagine_N_linked_glycosylation);R_MMU_204005(COPII_mediated_vesicle_transport);R_MMU_199991(Membrane_Trafficking)	0.613617	0.742769	0.8188	5.67158	7.80425	5.93825	0.112042	-3.15789	1.83139e-72	7.89191e-68	down	yes
38442	0	chr13	-	36867178	37049288	ENSMUST00000037491	15	3952	ENSMUSG00000039109	F13a1	GO:0003810(protein-glutamine gamma-glutamyltransferase activity);GO:0005576(extracellular region);GO:0005737(cytoplasm);GO:0007596(blood coagulation);GO:0007599(hemostasis);GO:0016740(transferase activity);GO:0016746(transferase activity, transferring acyl groups);GO:0018149(peptide cross-linking);GO:0046872(metal ion binding);GO:0062023(collagen-containing extracellular matrix);GO:0072378(blood …	04610(Complement and coagulation cascades)	K03917	EC:2.3.2.13	coagulation factor XIII, A1 subunit [Source:MGI Symbol;Acc:MGI:1921395]	protein_coding	R_MMU_109582(Hemostasis);R_MMU_76002(Platelet_activation,_signaling_and_aggregation);R_MMU_114608(Platelet_degranulation);R_MMU_140875(Common_Pathway_of_Fibrin_Clot_Formation);R_MMU_76005(Response_to_elevated_platelet_cytosolic_Ca2+);R_MMU_140877(Formation_of_Fibrin_Clot_(Clotting_Cascade))	0.543087	0.459677	0.407645	9.39381	5.51985	9.17289	0.0585559	-4.09404	2.42534e-53	6.96759e-49	down	yes
43939	0	chr14	-	31139013	31168641	ENSMUST00000036618	69	7999	ENSMUSG00000042286	Stab1	GO:0005041(low-density lipoprotein particle receptor activity);GO:0005044(scavenger receptor activity);GO:0005509(calcium ion binding);GO:0005540(hyaluronic acid binding);GO:0005887(integral component of plasma membrane);GO:0006897(endocytosis);GO:0007155(cell adhesion);GO:0007267(cell-cell signaling);GO:0016020(membrane);GO:0016525(negative regulation of angiogenesis);GO:0030169(low-density lipo…	NA	K19020	NA	stabilin 1 [Source:MGI Symbol;Acc:MGI:2178742]	protein_coding	R_MMU_5653656(Vesicle_mediated_transport);R_MMU_3000497(Scavenging_by_Class_H_Receptors);R_MMU_2173782(Binding_and_Uptake_of_Ligands_by_Scavenger_Receptors)	1.37312	1.26588	0.9099	6.60395	6.57571	5.76198	0.18736	-2.41612	2.36232e-45	5.08992e-41	down	yes
27611	0	chr11	-	83587882	83593087	ENSMUST00000019071	4	1440	ENSMUSG00000018927	Ccl6	GO:0002548(monocyte chemotaxis);GO:0005125(cytokine activity);GO:0005576(extracellular region);GO:0005615(extracellular space);GO:0006935(chemotaxis);GO:0006954(inflammatory response);GO:0006955(immune response);GO:0007186(G protein-coupled receptor signaling pathway);GO:0008009(chemokine activity);GO:0030593(neutrophil chemotaxis);GO:0043547(positive regulation of GTPase activity);GO:0048020(CCR…	04060(Cytokine-cytokine receptor interaction);04062(Chemokine signaling pathway)	K05510	NA	chemokine (C-C motif) ligand 6 [Source:MGI Symbol;Acc:MGI:98263]	protein_coding	R_MMU_373076(Class_A/1_(Rhodopsin_like_receptors));R_MMU_375276(Peptide_ligand_binding_receptors);R_MMU_500792(GPCR_ligand_binding);R_MMU_444473(Formyl_peptide_receptors_bind_formyl_peptides_and_many_other_ligands);R_MMU_416476(G_alpha_(q)_signalling_events);R_MMU_372790(Signaling_by_GPCR);R_MMU_388396(GPCR_downstream_signalling);R_MMU_162582(Signal_Transduction);R_MMU_418594(G_alpha_(i)_signalli…	19.0511	18.1248	17.0676	65.6126	61.3848	78.1523	0.264409	-1.91916	4.58687e-45	7.9064e-41	down	yes
63771	0	chr17	+	57358691	57483527	ENSMUST00000086763	22	3238	ENSMUSG00000004730	Adgre1	GO:0002250(adaptive immune response);GO:0002376(immune system process);GO:0004888(transmembrane signaling receptor activity);GO:0004930(G protein-coupled receptor activity);GO:0005509(calcium ion binding);GO:0005886(plasma membrane);GO:0005887(integral component of plasma membrane);GO:0007165(signal transduction);GO:0007166(cell surface receptor signaling pathway);GO:0007186(G protein-coupled rec…	NA	K04591	NA	adhesion G protein-coupled receptor E1 [Source:MGI Symbol;Acc:MGI:106912]	protein_coding	R_MMU_500792(GPCR_ligand_binding);R_MMU_373080(Class_B/2_(Secretin_family_receptors));R_MMU_372790(Signaling_by_GPCR);R_MMU_162582(Signal_Transduction)	3.06512	2.86839	2.2895	10.725	11.2706	11.8933	0.242646	-2.04307	2.74289e-43	3.93994e-39	down	yes
27624	0	chr11	+	83703991	83706268	ENSMUST00000092836	3	533	ENSMUSG00000069792	Wfdc17	GO:0004867(serine-type endopeptidase inhibitor activity);GO:0005576(extracellular region);GO:0005615(extracellular space);GO:0010466(negative regulation of peptidase activity);GO:0010951(negative regulation of endopeptidase activity);GO:0019731(antibacterial humoral response);GO:0030414(peptidase inhibitor activity);GO:0045087(innate immune response)	NA	NA	NA	WAP four-disulfide core domain 17 [Source:MGI Symbol;Acc:MGI:3649773]	protein_coding	NA	11.6846	14.2423	12.7155	58.6277	53.2385	70.2148	0.212226	-2.23633	6.82037e-41	8.39734e-37	down	yes
3046	0	X	+	101640060	101682940	ENSMUST00000119299	23	3840	ENSMUSG00000034160	Ogt	GO:0000123(histone acetyltransferase complex);GO:0000791(euchromatin);GO:0001933(negative regulation of protein phosphorylation);GO:0001934(positive regulation of protein phosphorylation);GO:0003824(catalytic activity);GO:0005515(protein binding);GO:0005547(phosphatidylinositol-3,4,5-trisphosphate binding);GO:0005634(nucleus);GO:0005654(nucleoplasm);GO:0005737(cytoplasm);GO:0005739(mitochondrion)…	00514(Other types of O-glycan biosynthesis);04931(Insulin resistance)	K09667	EC:2.4.1.255	O-linked N-acetylglucosamine (GlcNAc) transferase (UDP-N-acetylglucosamine:polypeptide-N-acetylglucosaminyl transferase) [Source:MGI Symbol;Acc:MGI:1339639]	protein_coding	R_MMU_5675482(Regulation_of_necroptotic_cell_death);R_MMU_5218859(Regulated_Necrosis);R_MMU_5357801(Programmed_Cell_Death);R_MMU_597592(Post_translational_protein_modification);R_MMU_392499(Metabolism_of_proteins);R_MMU_5688426(Deubiquitination);R_MMU_5213460(RIPK1_mediated_regulated_necrosis);R_MMU_3214847(HATs_acetylate_histones);R_MMU_5689603(UCH_proteinases);R_MMU_3247509(Chromatin_modifying_…	1.17092	1.23633	1.11745	4.27545	4.00405	3.43588	0.300861	-1.73283	5.62013e-40	6.05464e-36	down	yes
8550	0	chr1	-	36792194	36939822	ENSMUST00000194563	42	6698	ENSMUSG00000026116	Tmem131	GO:0003674(molecular_function);GO:0016020(membrane);GO:0016021(integral component of membrane)	NA	NA	NA	transmembrane protein 131 [Source:MGI Symbol;Acc:MGI:1927110]	protein_coding	NA	0.664825	0.742408	0.637092	1.94547	2.03983	1.96965	0.343299	-1.54246	2.1196e-39	2.02975e-35	down	yes
86469	0	chr3	+	87357881	87371073	ENSMUST00000015998	6	2036	ENSMUSG00000015854	Cd5l	GO:0002376(immune system process);GO:0004252(serine-type endopeptidase activity);GO:0005044(scavenger receptor activity);GO:0005576(extracellular region);GO:0005737(cytoplasm);GO:0005886(plasma membrane);GO:0006897(endocytosis);GO:0006915(apoptotic process);GO:0006954(inflammatory response);GO:0009986(cell surface);GO:0016020(membrane);GO:0030449(regulation of complement activation);GO:0031638(zy…	NA	NA	NA	CD5 antigen-like [Source:MGI Symbol;Acc:MGI:1334419]	protein_coding	NA	4.85877	4.87939	3.99616	19.0278	18.8127	24.1762	0.221462	-2.17487	1.66403e-37	1.43415e-33	down	yes
29001	0	chr11	-	100476358	100523598	ENSMUST00000165111	27	4162	ENSMUSG00000020917	Acly	GO:0000166(nucleotide binding);GO:0003824(catalytic activity);GO:0003878(ATP citrate synthase activity);GO:0005515(protein binding);GO:0005524(ATP binding);GO:0005654(nucleoplasm);GO:0005737(cytoplasm);GO:0005739(mitochondrion);GO:0005829(cytosol);GO:0005886(plasma membrane);GO:0006084(acetyl-CoA metabolic process);GO:0006085(acetyl-CoA biosynthetic process);GO:0006101(citrate metabolic process);…	00020(Citrate cycle (TCA cycle))	K01648	EC:2.3.3.8	ATP citrate lyase [Source:MGI Symbol;Acc:MGI:103251]	protein_coding	R_MMU_556833(Metabolism_of_lipids);R_MMU_1430728(Metabolism);R_MMU_8978868(Fatty_acid_metabolism);R_MMU_75105(Fatty_acyl_CoA_biosynthesis);R_MMU_168256(Immune_System);R_MMU_6798695(Neutrophil_degranulation);R_MMU_168249(Innate_Immune_System)	330.537	304.219	300.833	543.832	551.3	521.283	0.578805	-0.788851	2.3075e-36	1.80793e-32	down	no
112798	0	chr6	+	113307137	113324857	ENSMUST00000113122	14	4773	ENSMUSG00000001632	Brpf1	GO:0000123(histone acetyltransferase complex);GO:0001570(vasculogenesis);GO:0001841(neural tube formation);GO:0003676(nucleic acid binding);GO:0003677(DNA binding);GO:0005515(protein binding);GO:0005634(nucleus);GO:0005694(chromosome);GO:0005737(cytoplasm);GO:0005829(cytosol);GO:0005886(plasma membrane);GO:0006325(chromatin organization);GO:0035726(common myeloid progenitor cell proliferation);GO…	NA	K11348	NA	bromodomain and PHD finger containing, 1 [Source:MGI Symbol;Acc:MGI:1926033]	protein_coding	R_MMU_73857(RNA_Polymerase_II_Transcription);R_MMU_212436(Generic_Transcription_Pathway);R_MMU_3700989(Transcriptional_Regulation_by_TP53);R_MMU_5633007(Regulation_of_TP53_Activity);R_MMU_3214847(HATs_acetylate_histones);R_MMU_74160(Gene_expression_(Transcription));R_MMU_6804758(Regulation_of_TP53_Activity_through_Acetylation);R_MMU_3247509(Chromatin_modifying_enzymes);R_MMU_4839726(Chromatin_org…	2.1758	1.58966	1.50136	0.168861	0.192989	0.133864	10.6247	3.40935	1.54884e-34	1.11239e-30	up	yes
61828	0	chr17	-	34856379	34862173	ENSMUST00000154526	18	2397	ENSMUSG00000090231	Cfb	GO:0002376(immune system process);GO:0004252(serine-type endopeptidase activity);GO:0005576(extracellular region);GO:0005615(extracellular space);GO:0006508(proteolysis);GO:0006956(complement activation);GO:0006957(complement activation, alternative pathway);GO:0008233(peptidase activity);GO:0008236(serine-type peptidase activity);GO:0008283(cell population proliferation);GO:0016787(hydrolase act…	04610(Complement and coagulation cascades);05150(Staphylococcus aureus infection)	K01335	EC:3.4.21.47	complement factor B [Source:MGI Symbol;Acc:MGI:105975]	protein_coding	R_MMU_977606(Regulation_of_Complement_cascade);R_MMU_174577(Activation_of_C3_and_C5);R_MMU_166663(Initial_triggering_of_complement);R_MMU_166658(Complement_cascade);R_MMU_168256(Immune_System);R_MMU_168249(Innate_Immune_System);R_MMU_173736(Alternative_complement_activation)	22.0446	19.5435	28.2941	0	0	0	232941	17.8296	5.821e-34	3.8591e-30	up	yes
31214	0	chr11	-	120729489	120732114	ENSMUST00000026148	8	1110	ENSMUSG00000025150	Cbr2	GO:0004090(carbonyl reductase (NADPH) activity);GO:0005515(protein binding);GO:0005739(mitochondrion);GO:0005759(mitochondrial matrix);GO:0005997(xylulose metabolic process);GO:0006006(glucose metabolic process);GO:0006116(NADH oxidation);GO:0016491(oxidoreductase activity);GO:0042802(identical protein binding);GO:0043621(protein self-association);GO:0050038(L-xylulose reductase (NADP+) activity)…	00590(Arachidonic acid metabolism);00980(Metabolism of xenobiotics by cytochrome P450)	K00081	EC:1.1.1.184	carbonyl reductase 2 [Source:MGI Symbol;Acc:MGI:107200]	protein_coding	NA	2.57823	2.34635	2.36897	15.6905	10.6831	13.5791	0.182554	-2.4536	2.17889e-32	1.34134e-28	down	yes
113746	0	chr6	+	124320487	124330519	ENSMUST00000203210	6	2779	ENSMUSG00000008845	Cd163	GO:0005044(scavenger receptor activity);GO:0005576(extracellular region);GO:0005886(plasma membrane);GO:0006897(endocytosis);GO:0006953(acute-phase response);GO:0006954(inflammatory response);GO:0009897(external side of plasma membrane);GO:0016020(membrane);GO:0016021(integral component of membrane)	NA	K06545	NA	CD163 antigen [Source:MGI Symbol;Acc:MGI:2135946]	retained_intron	R_MMU_5653656(Vesicle_mediated_transport);R_MMU_2173782(Binding_and_Uptake_of_Ligands_by_Scavenger_Receptors);R_MMU_2168880(Scavenging_of_heme_from_plasma)	0.12595	0.136968	0.159829	1.28823	1.55044	1.56006	0.0961065	-3.37922	4.72301e-32	2.71368e-28	down	yes
112856	0	chr6	-	113424636	113435756	ENSMUST00000032416	6	1703	ENSMUSG00000030278	Cidec	GO:0003674(molecular_function);GO:0005634(nucleus);GO:0005783(endoplasmic reticulum);GO:0005811(lipid droplet);GO:0005829(cytosol);GO:0006915(apoptotic process);GO:0034389(lipid droplet organization);GO:0042981(regulation of apoptotic process);GO:0097194(execution phase of apoptosis)	NA	NA	NA	cell death-inducing DFFA-like effector c [Source:MGI Symbol;Acc:MGI:95585]	protein_coding	R_MMU_8964572(Lipid_particle_organization);R_MMU_556833(Metabolism_of_lipids);R_MMU_1430728(Metabolism)	352.018	360.551	313.077	574.763	580.239	549.137	0.601856	-0.73251	8.64776e-32	4.65817e-28	down	no
37142	0	chr13	-	12790816	12800079	ENSMUST00000099805	5	857	ENSMUSG00000056457	Prl2c3	GO:0005148(prolactin receptor binding);GO:0005179(hormone activity);GO:0005576(extracellular region);GO:0005615(extracellular space);GO:0005783(endoplasmic reticulum);GO:0007165(signal transduction);GO:0007565(female pregnancy);GO:0008083(growth factor activity);GO:0008284(positive regulation of cell population proliferation);GO:0030879(mammary gland development);GO:0031667(response to nutrient l…	NA	NA	NA	prolactin family 2, subfamily c, member 3 [Source:MGI Symbol;Acc:MGI:1341833]	protein_coding	NA	54.3987	60.6544	50.9932	23.4973	24.6094	25.4302	2.258	1.17504	9.81182e-32	4.97431e-28	up	yes
80803	0	chr2	-	131069220	131086765	ENSMUST00000028794	21	6387	ENSMUSG00000027322	Siglec1	GO:0016021(integral component of membrane)	04514(Cell adhesion molecules (CAMs))	K06548	NA	sialic acid binding Ig-like lectin 1, sialoadhesin [Source:MGI Symbol;Acc:MGI:99668]	protein_coding	R_MMU_198933(Immunoregulatory_interactions_between_a_Lymphoid_and_a_non_Lymphoid_cell);R_MMU_168256(Immune_System);R_MMU_1280218(Adaptive_Immune_System)	1.74074	1.8501	1.25489	8.4377	6.54085	8.43966	0.206921	-2.27285	1.29646e-31	6.2075e-28	down	yes
66007	0	chr18	-	33437019	33464029	ENSMUST00000168890	5	2185	ENSMUSG00000042834	Nrep	GO:0005515(protein binding);GO:0005634(nucleus);GO:0005737(cytoplasm);GO:0017015(regulation of transforming growth factor beta receptor signaling pathway);GO:0031103(axon regeneration);GO:0045664(regulation of neuron differentiation)	NA	NA	NA	neuronal regeneration related protein [Source:MGI Symbol;Acc:MGI:99444]	protein_coding	NA	3.42053	6.94436	7.45593	0	0	0.023618	754.544	9.55946	2.58482e-31	1.17249e-27	up	yes
62050	0	chr17	+	35379617	35384674	ENSMUST00000081435	6	1793	ENSMUSG00000035929	H2-Q4	GO:0002476(antigen processing and presentation of endogenous peptide antigen via MHC class Ib);GO:0005102(signaling receptor binding);GO:0005615(extracellular space);GO:0005783(endoplasmic reticulum);GO:0005794(Golgi apparatus);GO:0005797(Golgi medial cisterna);GO:0005886(plasma membrane);GO:0009897(external side of plasma membrane);GO:0009986(cell surface);GO:0016020(membrane);GO:0016021(integra…	04144(Endocytosis);04145(Phagosome);04218(Cellular senescence);04514(Cell adhesion molecules (CAMs));04612(Antigen processing and presentation);04650(Natural killer cell mediated cytotoxicity);04940(Type I diabetes mellitus);05163(Human cytomegalovirus infection);05165(Human papillomavirus infection);05166(Human T-cell leukemia virus 1 infection);05167(Kaposi sarcoma-associated herpesvirus infect…	K06751	NA	histocompatibility 2, Q region locus 4 [Source:MGI Symbol;Acc:MGI:95933]	protein_coding	R_MMU_1236977(Endosomal/Vacuolar_pathway);R_MMU_1236975(Antigen_processing_Cross_presentation);R_MMU_1236974(ER_Phagosome_pathway);R_MMU_198933(Immunoregulatory_interactions_between_a_Lymphoid_and_a_non_Lymphoid_cell);R_MMU_168256(Immune_System);R_MMU_983170(Antigen_Presentation:_Folding,_assembly_and_peptide_loading_of_class_I_MHC);R_MMU_6798695(Neutrophil_degranulation);R_MMU_168249(Innate_Immu…	62.5729	49.5823	55.9484	22.1223	22.2477	20.1587	2.60509	1.38134	2.82114e-30	1.2157e-26	up	yes
139490	0	chr9	-	86581371	86695953	ENSMUST00000034989	14	3288	ENSMUSG00000032418	Me1	GO:0004470(malic enzyme activity);GO:0004471(malate dehydrogenase (decarboxylating) (NAD+) activity);GO:0004473(malate dehydrogenase (decarboxylating) (NADP+) activity);GO:0005515(protein binding);GO:0005737(cytoplasm);GO:0005739(mitochondrion);GO:0005829(cytosol);GO:0006090(pyruvate metabolic process);GO:0006108(malate metabolic process);GO:0008948(oxaloacetate decarboxylase activity);GO:0009725…	00620(Pyruvate metabolism);03320(PPAR signaling pathway)	K00029	EC:1.1.1.40	malic enzyme 1, NADP(+)-dependent, cytosolic [Source:MGI Symbol;Acc:MGI:97043]	protein_coding	R_MMU_70268(Pyruvate_metabolism);R_MMU_1430728(Metabolism);R_MMU_71406(Pyruvate_metabolism_and_Citric_Acid_(TCA)_cycle);R_MMU_1428517(The_citric_acid_(TCA)_cycle_and_respiratory_electron_transport)	631.714	655.598	584.071	934.642	935.336	881.257	0.680198	-0.555974	2.16542e-29	8.88697e-26	down	no
21573	0	chr10	-	117277331	117282321	ENSMUST00000092163	4	1316	ENSMUSG00000069516	Lyz2	GO:0000137(Golgi cis cisterna);GO:0003796(lysozyme activity);GO:0003824(catalytic activity);GO:0005576(extracellular region);GO:0005615(extracellular space);GO:0005737(cytoplasm);GO:0005788(endoplasmic reticulum lumen);GO:0005795(Golgi stack);GO:0005902(microvillus);GO:0008152(metabolic process);GO:0016787(hydrolase activity);GO:0016798(hydrolase activity, acting on glycosyl bonds);GO:0019835(cyt…	04970(Salivary secretion)	K13915	EC:3.2.1.17	lysozyme 2 [Source:MGI Symbol;Acc:MGI:96897]	protein_coding	R_MMU_6803157(Antimicrobial_peptides);R_MMU_168256(Immune_System);R_MMU_6798695(Neutrophil_degranulation);R_MMU_168249(Innate_Immune_System)	104.622	106.056	86.2794	290.85	262.042	342.991	0.331469	-1.59306	8.35216e-29	3.27196e-25	down	yes
62062	0	chr17	+	35439207	35443769	ENSMUST00000173788	3	4209	ENSMUSG00000060550	H2-Q7	GO:0002376(immune system process);GO:0002474(antigen processing and presentation of peptide antigen via MHC class I);GO:0002476(antigen processing and presentation of endogenous peptide antigen via MHC class Ib);GO:0005102(signaling receptor binding);GO:0005615(extracellular space);GO:0005783(endoplasmic reticulum);GO:0005794(Golgi apparatus);GO:0005797(Golgi medial cisterna);GO:0005886(plasma me…	04144(Endocytosis);04145(Phagosome);04218(Cellular senescence);04514(Cell adhesion molecules (CAMs));04612(Antigen processing and presentation);04650(Natural killer cell mediated cytotoxicity);04940(Type I diabetes mellitus);05163(Human cytomegalovirus infection);05165(Human papillomavirus infection);05166(Human T-cell leukemia virus 1 infection);05167(Kaposi sarcoma-associated herpesvirus infect…	K06751	NA	histocompatibility 2, Q region locus 7 [Source:MGI Symbol;Acc:MGI:95936]	retained_intron	R_MMU_1236977(Endosomal/Vacuolar_pathway);R_MMU_1236975(Antigen_processing_Cross_presentation);R_MMU_1236974(ER_Phagosome_pathway);R_MMU_198933(Immunoregulatory_interactions_between_a_Lymphoid_and_a_non_Lymphoid_cell);R_MMU_168256(Immune_System);R_MMU_983170(Antigen_Presentation:_Folding,_assembly_and_peptide_loading_of_class_I_MHC);R_MMU_6798695(Neutrophil_degranulation);R_MMU_168249(Innate_Immu…	15.4959	15.4942	17.0453	6.17426	6.51476	7.17225	2.41855	1.27414	1.0085e-28	3.77904e-25	up	yes
79857	0	chr2	-	120355973	120404077	ENSMUST00000124806	19	2160	ENSMUSG00000033808	Tmem87a	GO:0005829(cytosol);GO:0016020(membrane);GO:0016021(integral component of membrane);GO:0032580(Golgi cisterna membrane);GO:0042147(retrograde transport, endosome to Golgi)	NA	NA	NA	transmembrane protein 87A [Source:MGI Symbol;Acc:MGI:2441844]	processed_transcript	R_MMU_8980692(RHOA_GTPase_cycle);R_MMU_9012999(RHO_GTPase_cycle);R_MMU_9716542(Signaling_by_Rho_GTPases,_Miro_GTPases_and_RHOBTB3);R_MMU_194315(Signaling_by_Rho_GTPases);R_MMU_162582(Signal_Transduction)	10.5426	8.98192	11.9917	0	0	0	105054	16.6808	1.9345e-28	6.77069e-25	up	yes
116910	0	chr7	-	16246745	16259338	ENSMUST00000168818	2	2540	ENSMUSG00000049130	C5ar1	GO:0001774(microglial cell activation);GO:0001856(complement component C5a binding);GO:0002430(complement receptor mediated signaling pathway);GO:0004875(complement receptor activity);GO:0004878(complement component C5a receptor activity);GO:0004930(G protein-coupled receptor activity);GO:0005886(plasma membrane);GO:0006915(apoptotic process);GO:0006935(chemotaxis);GO:0006954(inflammatory respons…	04080(Neuroactive ligand-receptor interaction);04610(Complement and coagulation cascades);05150(Staphylococcus aureus infection)	K04010	NA	complement component 5a receptor 1 [Source:MGI Symbol;Acc:MGI:88232]	protein_coding	R_MMU_977606(Regulation_of_Complement_cascade);R_MMU_373076(Class_A/1_(Rhodopsin_like_receptors));R_MMU_375276(Peptide_ligand_binding_receptors);R_MMU_166658(Complement_cascade);R_MMU_500792(GPCR_ligand_binding);R_MMU_168256(Immune_System);R_MMU_372790(Signaling_by_GPCR);R_MMU_388396(GPCR_downstream_signalling);R_MMU_6798695(Neutrophil_degranulation);R_MMU_168249(Innate_Immune_System);R_MMU_16258…	1.15712	1.32064	0.924555	4.50701	5.12314	5.33796	0.227304	-2.1373	1.964e-28	6.77069e-25	down	yes
14506	0	chr1	-	170958617	170976127	ENSMUST00000027966	8	3544	ENSMUSG00000026656	Fcgr2b	GO:0016020(membrane);GO:0016021(integral component of membrane)	04145(Phagosome);04380(Osteoclast differentiation);04662(B cell receptor signaling pathway);04666(Fc gamma R-mediated phagocytosis);05150(Staphylococcus aureus infection);05152(Tuberculosis);05162(Measles)	K12560	NA	Fc receptor, IgG, low affinity IIb [Source:MGI Symbol;Acc:MGI:95499]	protein_coding	R_MMU_2029481(FCGR_activation);R_MMU_2029480(Fcgamma_receptor_(FCGR)_dependent_phagocytosis);R_MMU_2029482(Regulation_of_actin_dynamics_for_phagocytic_cup_formation);R_MMU_198933(Immunoregulatory_interactions_between_a_Lymphoid_and_a_non_Lymphoid_cell);R_MMU_168256(Immune_System);R_MMU_6798695(Neutrophil_degranulation);R_MMU_2029485(Role_of_phospholipids_in_phagocytosis);R_MMU_168249(Innate_Immun…	0.25625	0.246517	0.432412	2.74814	2.67649	2.89868	0.112357	-3.15384	4.04012e-28	1.33922e-24	down	yes
96215	0	chr4	+	130913125	130936141	ENSMUST00000151698	8	2600	ENSMUSG00000028581	Laptm5	GO:0005764(lysosome);GO:0005765(lysosomal membrane);GO:0016020(membrane);GO:0016021(integral component of membrane);GO:1990830(cellular response to leukemia inhibitory factor)	04142(Lysosome)	K12387	NA	lysosomal-associated protein transmembrane 5 [Source:MGI Symbol;Acc:MGI:108046]	protein_coding	NA	10.7732	10.5836	9.44643	25.2395	23.2789	27.8763	0.403212	-1.31039	1.40322e-27	4.47912e-24	down	yes
721	0	X	-	20925454	20931555	ENSMUST00000001156	9	1636	ENSMUSG00000001128	Cfp	GO:0002376(immune system process);GO:0005576(extracellular region);GO:0005615(extracellular space);GO:0006957(complement activation, alternative pathway);GO:0030141(secretory granule);GO:0045087(innate immune response)	05168(Herpes simplex virus 1 infection)	K15412	NA	complement factor properdin [Source:MGI Symbol;Acc:MGI:97545]	protein_coding	R_MMU_977606(Regulation_of_Complement_cascade);R_MMU_174577(Activation_of_C3_and_C5);R_MMU_5173105(O_linked_glycosylation);R_MMU_166663(Initial_triggering_of_complement);R_MMU_166658(Complement_cascade);R_MMU_597592(Post_translational_protein_modification);R_MMU_392499(Metabolism_of_proteins);R_MMU_168256(Immune_System);R_MMU_5173214(O_glycosylation_of_TSR_domain_containing_proteins);R_MMU_679869…	4.40444	4.41064	3.53339	13.0857	13.6044	15.9141	0.289841	-1.78666	2.43693e-27	7.50095e-24	down	yes
18844	0	chr10	-	75506825	75517972	ENSMUST00000118936	6	2843	ENSMUSG00000033416	Gucd1	GO:0003674(molecular_function);GO:0005575(cellular_component);GO:0008150(biological_process)	NA	NA	NA	guanylyl cyclase domain containing 1 [Source:MGI Symbol;Acc:MGI:1916028]	protein_coding	NA	0	0.000497	0.001407	7.48249	8.40268	5.63272	8.84845e-05	-13.4642	3.46469e-27	1.02967e-23	down	yes
70951	0	chr19	+	21778342	21858327	ENSMUST00000096194	25	6667	ENSMUSG00000024754	Cemip2	GO:0001525(angiogenesis);GO:0004415(hyalurononglucosaminidase activity);GO:0005509(calcium ion binding);GO:0005886(plasma membrane);GO:0005887(integral component of plasma membrane);GO:0007275(multicellular organism development);GO:0008152(metabolic process);GO:0016020(membrane);GO:0016021(integral component of membrane);GO:0016787(hydrolase activity);GO:0016798(hydrolase activity, acting on glyc…	NA	K22144	EC:3.2.1.35	cell migration inducing hyaluronidase 2 [Source:MGI Symbol;Acc:MGI:1890373]	protein_coding	NA	0	0.007852	0.008873	1.34186	0.618007	1.72838	0.00453467	-7.78479	1.21699e-26	3.49622e-23	down	yes
48589	0	chr15	+	11064809	11349231	ENSMUST00000061318	24	8579	ENSMUSG00000047497	Adamts12	GO:0004222(metalloendopeptidase activity);GO:0005576(extracellular region);GO:0006508(proteolysis);GO:0007160(cell-matrix adhesion);GO:0008233(peptidase activity);GO:0008237(metallopeptidase activity);GO:0016477(cell migration);GO:0016787(hydrolase activity);GO:0030167(proteoglycan catabolic process);GO:0030198(extracellular matrix organization);GO:0031012(extracellular matrix);GO:0032331(negativ…	NA	K08626	EC:3.4.24.-	a disintegrin-like and metallopeptidase (reprolysin type) with thrombospondin type 1 motif, 12 [Source:MGI Symbol;Acc:MGI:2146046]	protein_coding	R_MMU_5173105(O_linked_glycosylation);R_MMU_597592(Post_translational_protein_modification);R_MMU_392499(Metabolism_of_proteins);R_MMU_5173214(O_glycosylation_of_TSR_domain_containing_proteins)	14.2284	14.6323	14.5435	9.67913	10.3143	9.56794	1.46828	0.554124	1.51789e-26	4.21998e-23	up	no
42311	0	chr13	+	119462784	119486117	ENSMUST00000224312	14	3406	ENSMUSG00000062822	4833420G17Rik	GO:0003674(molecular_function);GO:0005575(cellular_component);GO:0008150(biological_process)	NA	NA	NA	RIKEN cDNA 4833420G17 gene [Source:MGI Symbol;Acc:MGI:1914642]	protein_coding	NA	0.470963	0.751535	0.607178	2.7978	3.17733	2.73733	0.210007	-2.25149	7.33436e-26	1.97535e-22	down	yes
61830	0	chr17	-	34856384	34862514	ENSMUST00000176203	18	2733	ENSMUSG00000090231	Cfb	GO:0002376(immune system process);GO:0004252(serine-type endopeptidase activity);GO:0005576(extracellular region);GO:0005615(extracellular space);GO:0006508(proteolysis);GO:0006956(complement activation);GO:0006957(complement activation, alternative pathway);GO:0008233(peptidase activity);GO:0008236(serine-type peptidase activity);GO:0008283(cell population proliferation);GO:0016787(hydrolase act…	04610(Complement and coagulation cascades);05150(Staphylococcus aureus infection)	K01335	EC:3.4.21.47	complement factor B [Source:MGI Symbol;Acc:MGI:105975]	protein_coding	R_MMU_977606(Regulation_of_Complement_cascade);R_MMU_174577(Activation_of_C3_and_C5);R_MMU_166663(Initial_triggering_of_complement);R_MMU_166658(Complement_cascade);R_MMU_168256(Immune_System);R_MMU_168249(Innate_Immune_System);R_MMU_173736(Alternative_complement_activation)	3.72162	11.5993	12.6155	0	0	0	93121.5	16.5068	1.11978e-25	2.9245e-22	up	yes
30240	0	chr11	-	115042131	115048409	ENSMUST00000092459	4	852	ENSMUSG00000069607	Cd300ld3	GO:0002376(immune system process);GO:0005515(protein binding);GO:0005764(lysosome);GO:0005768(endosome);GO:0005769(early endosome);GO:0005886(plasma membrane);GO:0016020(membrane);GO:0016021(integral component of membrane);GO:0031398(positive regulation of protein ubiquitination);GO:0034165(positive regulation of toll-like receptor 9 signaling pathway)	NA	K20395	NA	CD300 molecule like family member D3 [Source:MGI Symbol;Acc:MGI:2687214]	protein_coding	NA	2.1972	2.10545	1.52276	9.99775	9.89658	12.0044	0.182622	-2.45307	1.22009e-25	3.09276e-22	down	yes
62056	0	chr17	+	35424850	35430055	ENSMUST00000174699	6	2085	ENSMUSG00000073409	H2-Q6	GO:0002476(antigen processing and presentation of endogenous peptide antigen via MHC class Ib);GO:0005102(signaling receptor binding);GO:0005615(extracellular space);GO:0005783(endoplasmic reticulum);GO:0005794(Golgi apparatus);GO:0005797(Golgi medial cisterna);GO:0005886(plasma membrane);GO:0009897(external side of plasma membrane);GO:0009986(cell surface);GO:0016020(membrane);GO:0016021(integra…	04144(Endocytosis);04145(Phagosome);04218(Cellular senescence);04514(Cell adhesion molecules (CAMs));04612(Antigen processing and presentation);04650(Natural killer cell mediated cytotoxicity);04940(Type I diabetes mellitus);05163(Human cytomegalovirus infection);05165(Human papillomavirus infection);05166(Human T-cell leukemia virus 1 infection);05167(Kaposi sarcoma-associated herpesvirus infect…	K06751	NA	histocompatibility 2, Q region locus 6 [Source:MGI Symbol;Acc:MGI:95935]	protein_coding	R_MMU_1236977(Endosomal/Vacuolar_pathway);R_MMU_1236975(Antigen_processing_Cross_presentation);R_MMU_1236974(ER_Phagosome_pathway);R_MMU_198933(Immunoregulatory_interactions_between_a_Lymphoid_and_a_non_Lymphoid_cell);R_MMU_168256(Immune_System);R_MMU_983170(Antigen_Presentation:_Folding,_assembly_and_peptide_loading_of_class_I_MHC);R_MMU_6798695(Neutrophil_degranulation);R_MMU_168249(Innate_Immu…	44.2162	37.3123	52.1557	13.1677	12.619	14.5876	3.31112	1.72732	1.92612e-25	4.74292e-22	up	yes
17809	0	chr10	+	51490963	51496588	ENSMUST00000219175	7	2405	ENSMUSG00000112148	Lilrb4a	GO:0001780(neutrophil homeostasis);GO:0002250(adaptive immune response);GO:0002376(immune system process);GO:0002437(inflammatory response to antigenic stimulus);GO:0005886(plasma membrane);GO:0006954(inflammatory response);GO:0007596(blood coagulation);GO:0009611(response to wounding);GO:0009624(response to nematode);GO:0009897(external side of plasma membrane);GO:0009991(response to extracellul…	04380(Osteoclast differentiation)	K06512	NA	leukocyte immunoglobulin-like receptor, subfamily B, member 4A [Source:MGI Symbol;Acc:MGI:102701]	retained_intron	R_MMU_168256(Immune_System);R_MMU_6798695(Neutrophil_degranulation);R_MMU_168249(Innate_Immune_System)	1.70234	1.97718	1.0264	9.84545	9.28828	8.72279	0.168934	-2.56547	2.26788e-25	5.42936e-22	down	yes
52278	0	chr15	-	93239742	93275161	ENSMUST00000049484	8	6611	ENSMUSG00000036197	Gxylt1	GO:0005575(cellular_component);GO:0016020(membrane);GO:0016021(integral component of membrane);GO:0016266(O-glycan processing);GO:0016740(transferase activity);GO:0016757(transferase activity, transferring glycosyl groups);GO:0035252(UDP-xylosyltransferase activity)	00514(Other types of O-glycan biosynthesis)	K13676	EC:2.4.2.-	glucoside xylosyltransferase 1 [Source:MGI Symbol;Acc:MGI:2684933]	protein_coding	NA	7.31557	7.98685	8.09038	3.99458	4.38177	4.22486	1.85639	0.892503	3.23233e-25	7.52915e-22	up	no
113912	0	chr6	+	124931476	124936144	ENSMUST00000032214	9	1451	ENSMUSG00000030120	Mlf2	GO:0005515(protein binding);GO:0005634(nucleus);GO:0005737(cytoplasm);GO:0006355(regulation of transcription, DNA-templated)	NA	NA	NA	myeloid leukemia factor 2 [Source:MGI Symbol;Acc:MGI:1353554]	protein_coding	NA	34.8962	33.3615	35.4946	11.9416	8.65086	11.6832	3.21456	1.68462	6.73107e-25	1.52662e-21	up	yes
96896	0	chr4	-	136889804	136893065	ENSMUST00000046332	3	1203	ENSMUSG00000036896	C1qc	GO:0002376(immune system process);GO:0005515(protein binding);GO:0005576(extracellular region);GO:0005581(collagen trimer);GO:0005615(extracellular space);GO:0006958(complement activation, classical pathway);GO:0030853(negative regulation of granulocyte differentiation);GO:0045087(innate immune response);GO:0045202(synapse);GO:0045650(negative regulation of macrophage differentiation);GO:0098794(…	04610(Complement and coagulation cascades);05020(Prion diseases);05133(Pertussis);05142(Chagas disease (American trypanosomiasis));05150(Staphylococcus aureus infection);05322(Systemic lupus erythematosus)	K03988	NA	complement component 1, q subcomponent, C chain [Source:MGI Symbol;Acc:MGI:88225]	protein_coding	R_MMU_977606(Regulation_of_Complement_cascade);R_MMU_173623(Classical_antibody_mediated_complement_activation);R_MMU_166663(Initial_triggering_of_complement);R_MMU_166658(Complement_cascade);R_MMU_168256(Immune_System);R_MMU_166786(Creation_of_C4_and_C2_activators);R_MMU_168249(Innate_Immune_System)	9.53147	8.72987	6.75384	32.177	29.5626	39.3979	0.247338	-2.01544	7.66661e-25	1.69422e-21	down	yes
72949	0	chr19	-	61224402	61228418	ENSMUST00000076046	12	1849	ENSMUSG00000059326	Csf2ra	GO:0004896(cytokine receptor activity);GO:0005515(protein binding);GO:0009897(external side of plasma membrane);GO:0016020(membrane);GO:0016021(integral component of membrane);GO:0019221(cytokine-mediated signaling pathway);GO:0019955(cytokine binding);GO:0043235(receptor complex)	04060(Cytokine-cytokine receptor interaction);04630(Jak-STAT signaling pathway);04640(Hematopoietic cell lineage);05200(Pathways in cancer)	K05066	NA	colony stimulating factor 2 receptor, alpha, low-affinity (granulocyte-macrophage) [Source:MGI Symbol;Acc:MGI:1339754]	protein_coding	R_MMU_5683057(MAPK_family_signaling_cascades);R_MMU_449147(Signaling_by_Interleukins);R_MMU_5673001(RAF/MAP_kinase_cascade);R_MMU_451927(Interleukin_2_family_signaling);R_MMU_5683826(Surfactant_metabolism);R_MMU_392499(Metabolism_of_proteins);R_MMU_168256(Immune_System);R_MMU_912526(Interleukin_receptor_SHC_signaling);R_MMU_1280215(Cytokine_Signaling_in_Immune_system);R_MMU_162582(Signal_Transduc…	1.10532	1.34003	1.30692	3.96998	3.91157	3.63758	0.325742	-1.6182	8.46806e-24	1.82455e-20	down	yes
2832	0	X	-	96247203	96293438	ENSMUST00000050707	7	1432	ENSMUSG00000044206	Vsig4	GO:0001851(complement component C3b binding);GO:0016020(membrane);GO:0016021(integral component of membrane);GO:0032703(negative regulation of interleukin-2 production);GO:0032991(protein-containing complex);GO:0042130(negative regulation of T cell proliferation);GO:0043031(negative regulation of macrophage activation);GO:0045957(negative regulation of complement activation, alternative pathway)	04610(Complement and coagulation cascades)	K19822	NA	V-set and immunoglobulin domain containing 4 [Source:MGI Symbol;Acc:MGI:2679720]	protein_coding	NA	0.190192	0.290098	0.218822	2.0978	1.9446	2.34208	0.109502	-3.19097	1.29261e-23	2.71715e-20	down	yes
66351	0	chr18	-	36667429	36670285	ENSMUST00000006209	5	695	ENSMUSG00000006050	Sra1	GO:0002153(steroid receptor RNA activator RNA binding);GO:0003677(DNA binding);GO:0003712(transcription coregulator activity);GO:0003713(transcription coactivator activity);GO:0005634(nucleus);GO:0005654(nucleoplasm);GO:0005667(transcription factor complex);GO:0005737(cytoplasm);GO:0005829(cytosol);GO:0005831(steroid hormone aporeceptor complex);GO:0005886(plasma membrane);GO:0006357(regulation o…	NA	NA	NA	steroid receptor RNA activator 1 [Source:MGI Symbol;Acc:MGI:1344414]	protein_coding	NA	0	0	0	11.1712	12.804	15.3192	7.63467e-06	-16.999	4.45148e-23	9.13453e-20	down	yes
50213	0	chr15	+	74955668	74959331	ENSMUST00000188503	3	1211	ENSMUSG00000022587	Ly6e	GO:0016020(membrane);GO:0016021(integral component of membrane)	NA	K06846	NA	lymphocyte antigen 6 complex, locus E [Source:MGI Symbol;Acc:MGI:106651]	retained_intron	R_MMU_597592(Post_translational_protein_modification);R_MMU_392499(Metabolism_of_proteins);R_MMU_163125(Post_translational_modification:_synthesis_of_GPI_anchored_proteins)	72.4312	70.7039	72.1501	24.895	28.2855	32.4851	2.51309	1.32946	7.66207e-23	1.53571e-19	up	yes
10947	0	chr1	+	85649988	85701561	ENSMUST00000155094	17	1666	ENSMUSG00000026222	Sp100	GO:0000723(telomere maintenance);GO:0003677(DNA binding);GO:0005515(protein binding);GO:0005634(nucleus);GO:0005737(cytoplasm);GO:0010596(negative regulation of endothelial cell migration);GO:0016605(PML body);GO:0030870(Mre11 complex);GO:0045765(regulation of angiogenesis);GO:0046826(negative regulation of protein export from nucleus);GO:0046872(metal ion binding);GO:1902041(regulation of extrin…	05168(Herpes simplex virus 1 infection);05203(Viral carcinogenesis)	K15413	NA	nuclear antigen Sp100 [Source:MGI Symbol;Acc:MGI:109561]	protein_coding	R_MMU_3108214(SUMOylation_of_DNA_damage_response_and_repair_proteins);R_MMU_597592(Post_translational_protein_modification);R_MMU_392499(Metabolism_of_proteins);R_MMU_3108232(SUMO_E3_ligases_SUMOylate_target_proteins);R_MMU_2990846(SUMOylation)	2.96352	2.49767	3.55854	0.249129	0.412752	0.264216	9.73951	3.28385	8.48357e-23	1.66172e-19	up	yes
72249	0	chr19	+	46131897	46135312	ENSMUST00000043739	4	1593	ENSMUSG00000038754	Elovl3	GO:0005783(endoplasmic reticulum);GO:0005789(endoplasmic reticulum membrane);GO:0006629(lipid metabolic process);GO:0006631(fatty acid metabolic process);GO:0006633(fatty acid biosynthetic process);GO:0006636(unsaturated fatty acid biosynthetic process);GO:0009922(fatty acid elongase activity);GO:0016020(membrane);GO:0016021(integral component of membrane);GO:0016740(transferase activity);GO:0019…	00062(Fatty acid elongation);01040(Biosynthesis of unsaturated fatty acids)	K10248	EC:2.3.1.199	elongation of very long chain fatty acids (FEN1/Elo2, SUR4/Elo3, yeast)-like 3 [Source:MGI Symbol;Acc:MGI:1195976]	protein_coding	R_MMU_556833(Metabolism_of_lipids);R_MMU_1430728(Metabolism);R_MMU_8978868(Fatty_acid_metabolism);R_MMU_75105(Fatty_acyl_CoA_biosynthesis);R_MMU_2046106(alpha_linolenic_acid_(ALA)_metabolism);R_MMU_75876(Synthesis_of_very_long_chain_fatty_acyl_CoAs);R_MMU_2046105(Linoleic_acid_(LA)_metabolism);R_MMU_2046104(alpha_linolenic_(omega3)_and_linoleic_(omega6)_acid_metabolism)	4.45112	5.58574	4.78491	14.9321	13.3189	17.0749	0.327004	-1.61262	9.48669e-23	1.81691e-19	down	yes
18126	0	chr10	+	60284461	60302597	ENSMUST00000165878	14	2564	ENSMUSG00000004207	Psap	GO:0001664(G protein-coupled receptor binding);GO:0001865(NK T cell differentiation);GO:0002020(protease binding);GO:0003335(corneocyte development);GO:0004565(beta-galactosidase activity);GO:0005515(protein binding);GO:0005543(phospholipid binding);GO:0005576(extracellular region);GO:0005615(extracellular space);GO:0005737(cytoplasm);GO:0005739(mitochondrion);GO:0005764(lysosome);GO:0005770(late…	04142(Lysosome)	K12382	NA	prosaposin [Source:MGI Symbol;Acc:MGI:97783]	protein_coding	R_MMU_373076(Class_A/1_(Rhodopsin_like_receptors));R_MMU_556833(Metabolism_of_lipids);R_MMU_109582(Hemostasis);R_MMU_1430728(Metabolism);R_MMU_1660662(Glycosphingolipid_metabolism);R_MMU_375276(Peptide_ligand_binding_receptors);R_MMU_500792(GPCR_ligand_binding);R_MMU_76002(Platelet_activation,_signaling_and_aggregation);R_MMU_168256(Immune_System);R_MMU_114608(Platelet_degranulation);R_MMU_372790…	0	0	0	9.6157	46.4664	44.6858	2.97714e-06	-18.3576	2.26875e-22	4.19816e-19	down	yes
112582	0	chr6	+	103511068	103733038	ENSMUST00000066905	27	7562	ENSMUSG00000030077	Chl1	GO:0001764(neuron migration);GO:0002020(protease binding);GO:0005515(protein binding);GO:0005576(extracellular region);GO:0005886(plasma membrane);GO:0007155(cell adhesion);GO:0007275(multicellular organism development);GO:0007399(nervous system development);GO:0007411(axon guidance);GO:0008344(adult locomotory behavior);GO:0016020(membrane);GO:0016021(integral component of membrane);GO:0030154(c…	NA	K06758	NA	cell adhesion molecule L1-like [Source:MGI Symbol;Acc:MGI:1098266]	protein_coding	NA	1.1289	1.40407	1.40905	0.278105	0.382386	0.275	4.21386	2.07514	2.29915e-22	4.19816e-19	up	yes
96895	0	chr4	-	136880129	136886187	ENSMUST00000046384	3	1088	ENSMUSG00000036905	C1qb	GO:0002376(immune system process);GO:0005515(protein binding);GO:0005576(extracellular region);GO:0005581(collagen trimer);GO:0005602(complement component C1 complex);GO:0005615(extracellular space);GO:0006958(complement activation, classical pathway);GO:0045087(innate immune response);GO:0045202(synapse);GO:0048839(inner ear development);GO:0098794(postsynapse);GO:0098883(synapse pruning)	04610(Complement and coagulation cascades);05020(Prion diseases);05133(Pertussis);05142(Chagas disease (American trypanosomiasis));05150(Staphylococcus aureus infection);05322(Systemic lupus erythematosus)	K03987	NA	complement component 1, q subcomponent, beta polypeptide [Source:MGI Symbol;Acc:MGI:88224]	protein_coding	R_MMU_977606(Regulation_of_Complement_cascade);R_MMU_173623(Classical_antibody_mediated_complement_activation);R_MMU_166663(Initial_triggering_of_complement);R_MMU_166658(Complement_cascade);R_MMU_168256(Immune_System);R_MMU_166786(Creation_of_C4_and_C2_activators);R_MMU_168249(Innate_Immune_System)	10.6269	10.7706	8.96734	34.387	31.0825	44.9065	0.275103	-1.86196	2.33813e-22	4.19816e-19	down	yes
214	0	X	+	7722250	7728182	ENSMUST00000115688	11	1510	ENSMUSG00000039382	Wdr45	GO:0000045(autophagosome assembly);GO:0000407(phagophore assembly site);GO:0000422(autophagy of mitochondrion);GO:0005515(protein binding);GO:0005737(cytoplasm);GO:0005829(cytosol);GO:0006497(protein lipidation);GO:0006914(autophagy);GO:0008289(lipid binding);GO:0009267(cellular response to starvation);GO:0019898(extrinsic component of membrane);GO:0019901(protein kinase binding);GO:0032266(phosp…	NA	K22991	NA	WD repeat domain 45 [Source:MGI Symbol;Acc:MGI:1859606]	protein_coding	R_MMU_9612973(Autophagy);R_MMU_1632852(Macroautophagy)	0.680714	1.04886	0.808675	5.14273	4.03711	5.25742	0.175813	-2.50789	3.30673e-22	5.81613e-19	down	yes
75220	0	chr2	+	31887344	31946539	ENSMUST00000028187	28	5871	ENSMUSG00000026840	Lamc3	GO:0000904(cell morphogenesis involved in differentiation);GO:0005576(extracellular region);GO:0005604(basement membrane);GO:0007155(cell adhesion);GO:0007601(visual perception);GO:0009887(animal organ morphogenesis);GO:0009888(tissue development);GO:0014002(astrocyte development);GO:0016020(membrane);GO:0016477(cell migration);GO:0034446(substrate adhesion-dependent cell spreading);GO:0060041(re…	04151(PI3K-Akt signaling pathway);04510(Focal adhesion);04512(ECM-receptor interaction);05145(Toxoplasmosis);05146(Amoebiasis);05165(Human papillomavirus infection);05200(Pathways in cancer);05222(Small cell lung cancer)	NA	NA	laminin gamma 3 [Source:MGI Symbol;Acc:MGI:1344394]	protein_coding	R_MMU_8875878(MET_promotes_cell_motility);R_MMU_3000157(Laminin_interactions);R_MMU_1474244(Extracellular_matrix_organization);R_MMU_9006934(Signaling_by_Receptor_Tyrosine_Kinases);R_MMU_6806834(Signaling_by_MET);R_MMU_162582(Signal_Transduction);R_MMU_8874081(MET_activates_PTK2_signaling)	0.288528	0.171279	0.251648	1.38461	1.40613	1.24905	0.176112	-2.50543	1.44419e-21	2.48936e-18	down	yes
74327	0	chr2	-	25624666	25628030	ENSMUST00000028307	10	1374	ENSMUSG00000026938	Fcna	GO:0001867(complement activation, lectin pathway);GO:0002376(immune system process);GO:0002752(cell surface pattern recognition receptor signaling pathway);GO:0003823(antigen binding);GO:0005102(signaling receptor binding);GO:0005576(extracellular region);GO:0005581(collagen trimer);GO:0005615(extracellular space);GO:0005886(plasma membrane);GO:0007186(G protein-coupled receptor signaling pathway…	NA	K10104	NA	ficolin A [Source:MGI Symbol;Acc:MGI:1340905]	protein_coding	R_MMU_166663(Initial_triggering_of_complement);R_MMU_166658(Complement_cascade);R_MMU_166662(Lectin_pathway_of_complement_activation);R_MMU_168256(Immune_System);R_MMU_166786(Creation_of_C4_and_C2_activators);R_MMU_6798695(Neutrophil_degranulation);R_MMU_168249(Innate_Immune_System);R_MMU_2855086(Ficolins_bind_to_repetitive_carbohydrate_structures_on_the_target_cell_surface)	0.627122	0.680001	0.536492	3.68237	3.31474	4.73606	0.157128	-2.66998	1.50431e-21	2.54213e-18	down	yes
67376	0	chr18	+	61105852	61132149	ENSMUST00000115268	21	4701	ENSMUSG00000024621	Csf1r	GO:0000166(nucleotide binding);GO:0001934(positive regulation of protein phosphorylation);GO:0002244(hematopoietic progenitor cell differentiation);GO:0002376(immune system process);GO:0002931(response to ischemia);GO:0004672(protein kinase activity);GO:0004713(protein tyrosine kinase activity);GO:0004714(transmembrane receptor protein tyrosine kinase activity);GO:0005011(macrophage colony-stimul…	04010(MAPK signaling pathway);04014(Ras signaling pathway);04015(Rap1 signaling pathway);04060(Cytokine-cytokine receptor interaction);04151(PI3K-Akt signaling pathway);04380(Osteoclast differentiation);04640(Hematopoietic cell lineage);05200(Pathways in cancer);05202(Transcriptional misregulation in cancer);05221(Acute myeloid leukemia)	K05090	EC:2.7.10.1	colony stimulating factor 1 receptor [Source:MGI Symbol;Acc:MGI:1339758]	protein_coding	R_MMU_449147(Signaling_by_Interleukins);R_MMU_449836(Other_interleukin_signaling);R_MMU_168256(Immune_System);R_MMU_1280215(Cytokine_Signaling_in_Immune_system)	4.05054	3.50045	2.99952	10.0817	8.82084	10.2316	0.362135	-1.4654	1.92871e-21	3.19665e-18	down	yes
62254	0	chr17	-	36038409	36042747	ENSMUST00000077960	10	1694	ENSMUSG00000056116	H2-T22	GO:0002476(antigen processing and presentation of endogenous peptide antigen via MHC class Ib);GO:0005615(extracellular space);GO:0009897(external side of plasma membrane);GO:0016020(membrane);GO:0016021(integral component of membrane)	04144(Endocytosis);04145(Phagosome);04218(Cellular senescence);04514(Cell adhesion molecules (CAMs));04612(Antigen processing and presentation);04650(Natural killer cell mediated cytotoxicity);04940(Type I diabetes mellitus);05163(Human cytomegalovirus infection);05165(Human papillomavirus infection);05166(Human T-cell leukemia virus 1 infection);05167(Kaposi sarcoma-associated herpesvirus infect…	K06751	NA	histocompatibility 2, T region locus 22 [Source:MGI Symbol;Acc:MGI:95956]	protein_coding	R_MMU_1236977(Endosomal/Vacuolar_pathway);R_MMU_1236975(Antigen_processing_Cross_presentation);R_MMU_1236974(ER_Phagosome_pathway);R_MMU_198933(Immunoregulatory_interactions_between_a_Lymphoid_and_a_non_Lymphoid_cell);R_MMU_168256(Immune_System);R_MMU_983170(Antigen_Presentation:_Folding,_assembly_and_peptide_loading_of_class_I_MHC);R_MMU_6798695(Neutrophil_degranulation);R_MMU_168249(Innate_Immu…	47.0184	51.2699	61.6995	20.3297	23.1164	22.2396	2.43566	1.28431	5.00555e-21	8.13969e-18	up	yes
14518	0	chr1	-	171051175	171059403	ENSMUST00000164044	5	1347	ENSMUSG00000059498	Fcgr3	GO:0016020(membrane);GO:0016021(integral component of membrane)	04145(Phagosome);04380(Osteoclast differentiation);05140(Leishmaniasis);05150(Staphylococcus aureus infection);05152(Tuberculosis)	K16824	NA	Fc receptor, IgG, low affinity III [Source:MGI Symbol;Acc:MGI:95500]	protein_coding	R_MMU_198933(Immunoregulatory_interactions_between_a_Lymphoid_and_a_non_Lymphoid_cell);R_MMU_168256(Immune_System);R_MMU_1280218(Adaptive_Immune_System)	8.17831	7.92327	7.38418	20.9223	17.802	22.6939	0.382391	-1.38688	5.89482e-21	9.40825e-18	down	yes
37151	0	chr13	-	12996125	13005383	ENSMUST00000110594	5	842	ENSMUSG00000079092	Prl2c2	GO:0002040(sprouting angiogenesis);GO:0002052(positive regulation of neuroblast proliferation);GO:0005148(prolactin receptor binding);GO:0005179(hormone activity);GO:0005515(protein binding);GO:0005576(extracellular region);GO:0005615(extracellular space);GO:0005783(endoplasmic reticulum);GO:0007165(signal transduction);GO:0007565(female pregnancy);GO:0008083(growth factor activity);GO:0008284(po…	NA	NA	NA	prolactin family 2, subfamily c, member 2 [Source:MGI Symbol;Acc:MGI:97618]	protein_coding	NA	84.6674	87.7505	98.8905	35.7302	24.2112	30.3008	3.00645	1.58806	7.51292e-21	1.17727e-17	up	yes
48408	0	chr15	-	6813577	6874969	ENSMUST00000022746	18	5491	ENSMUSG00000022146	Osmr	GO:0004896(cytokine receptor activity);GO:0004924(oncostatin-M receptor activity);GO:0005515(protein binding);GO:0005900(oncostatin-M receptor complex);GO:0008284(positive regulation of cell population proliferation);GO:0016020(membrane);GO:0016021(integral component of membrane);GO:0016324(apical plasma membrane);GO:0019221(cytokine-mediated signaling pathway);GO:0019838(growth factor binding);G…	04060(Cytokine-cytokine receptor interaction);04151(PI3K-Akt signaling pathway);04630(Jak-STAT signaling pathway)	K05057	NA	oncostatin M receptor [Source:MGI Symbol;Acc:MGI:1330819]	protein_coding	R_MMU_449147(Signaling_by_Interleukins);R_MMU_6783589(Interleukin_6_family_signaling);R_MMU_168256(Immune_System);R_MMU_1280215(Cytokine_Signaling_in_Immune_system);R_MMU_6788467(IL_6_type_cytokine_receptor_ligand_interactions)	25.7669	26.3644	26.1996	16.2486	14.6441	16.138	1.66553	0.735977	8.95432e-21	1.37809e-17	up	no
56253	0	chr16	-	45746243	45844378	ENSMUST00000036355	18	5483	ENSMUSG00000033149	Phldb2	GO:0000226(microtubule cytoskeleton organization);GO:0005737(cytoplasm);GO:0005829(cytosol);GO:0005886(plasma membrane);GO:0005925(focal adhesion);GO:0010470(regulation of gastrulation);GO:0010717(regulation of epithelial to mesenchymal transition);GO:0016020(membrane);GO:0031252(cell leading edge);GO:0045111(intermediate filament cytoskeleton);GO:0045180(basal cortex);GO:0045184(establishment of…	NA	NA	NA	pleckstrin homology like domain, family B, member 2 [Source:MGI Symbol;Acc:MGI:2444981]	protein_coding	NA	10.1489	9.68688	9.85033	5.74442	5.94438	6.02249	1.67611	0.74512	9.98256e-21	1.48918e-17	up	no
39043	0	chr13	+	49687393	49733741	ENSMUST00000164260	33	3789	ENSMUSG00000037851	Iars	GO:0000049(tRNA binding);GO:0000166(nucleotide binding);GO:0002161(aminoacyl-tRNA editing activity);GO:0004812(aminoacyl-tRNA ligase activity);GO:0004822(isoleucine-tRNA ligase activity);GO:0005524(ATP binding);GO:0005737(cytoplasm);GO:0005829(cytosol);GO:0006412(translation);GO:0006418(tRNA aminoacylation for protein translation);GO:0006428(isoleucyl-tRNA aminoacylation);GO:0016874(ligase activi…	00970(Aminoacyl-tRNA biosynthesis)	K01870	EC:6.1.1.5	isoleucine-tRNA synthetase [Source:MGI Symbol;Acc:MGI:2145219]	protein_coding	NA	1.48116	1.09445	1.21771	0.251761	0.209804	0.191958	5.80442	2.53715	1.00217e-20	1.48918e-17	up	yes
115648	0	chr7	-	3836812	3845051	ENSMUST00000108615	10	3462	ENSMUSG00000089942	Pira2	GO:0003674(molecular_function);GO:0005575(cellular_component);GO:0008150(biological_process)	04380(Osteoclast differentiation)	K06512	NA	paired-Ig-like receptor A2 [Source:MGI Symbol;Acc:MGI:1195970]	protein_coding	NA	0.692152	0.723473	0.663353	2.0834	1.84564	1.82485	0.361317	-1.46866	1.33809e-20	1.95463e-17	down	yes
79854	0	chr2	-	120355312	120404069	ENSMUST00000090042	20	2874	ENSMUSG00000033808	Tmem87a	GO:0005829(cytosol);GO:0016020(membrane);GO:0016021(integral component of membrane);GO:0032580(Golgi cisterna membrane);GO:0042147(retrograde transport, endosome to Golgi)	NA	NA	NA	transmembrane protein 87A [Source:MGI Symbol;Acc:MGI:2441844]	protein_coding	R_MMU_8980692(RHOA_GTPase_cycle);R_MMU_9012999(RHO_GTPase_cycle);R_MMU_9716542(Signaling_by_Rho_GTPases,_Miro_GTPases_and_RHOBTB3);R_MMU_194315(Signaling_by_Rho_GTPases);R_MMU_162582(Signal_Transduction)	0	0	0	4.39288	4.36507	1.3986	2.95376e-05	-15.0471	1.41554e-20	2.03331e-17	down	yes
9015	0	chr1	-	45908068	45925582	ENSMUST00000027137	8	3370	ENSMUSG00000025993	Slc40a1	GO:0002260(lymphocyte homeostasis);GO:0003158(endothelium development);GO:0005381(iron ion transmembrane transporter activity);GO:0005515(protein binding);GO:0005654(nucleoplasm);GO:0005829(cytosol);GO:0005886(plasma membrane);GO:0006811(ion transport);GO:0006826(iron ion transport);GO:0006879(cellular iron ion homeostasis);GO:0008021(synaptic vesicle);GO:0015093(ferrous iron transmembrane transp…	04216(Ferroptosis);04978(Mineral absorption)	K14685	NA	solute carrier family 40 (iron-regulated transporter), member 1 [Source:MGI Symbol;Acc:MGI:1315204]	protein_coding	R_MMU_425410(Metal_ion_SLC_transporters);R_MMU_425407(SLC_mediated_transmembrane_transport);R_MMU_382551(Transport_of_small_molecules);R_MMU_425366(Transport_of_bile_salts_and_organic_acids,_metal_ions_and_amine_compounds);R_MMU_917937(Iron_uptake_and_transport)	6.09571	7.02079	6.62466	13.361	13.2373	15.3599	0.470496	-1.08775	1.70386e-20	2.40733e-17	down	yes
61768	0	chr17	-	34728380	34743882	ENSMUST00000069507	41	5379	ENSMUSG00000073418	C4b	GO:0001848(complement binding);GO:0001849(complement component C1q complex binding);GO:0002376(immune system process);GO:0004866(endopeptidase inhibitor activity);GO:0005515(protein binding);GO:0005576(extracellular region);GO:0005615(extracellular space);GO:0006954(inflammatory response);GO:0006956(complement activation);GO:0006958(complement activation, classical pathway);GO:0010951(negative re…	04610(Complement and coagulation cascades);05133(Pertussis);05150(Staphylococcus aureus infection);05322(Systemic lupus erythematosus)	K03989	NA	complement component 4B (Chido blood group) [Source:MGI Symbol;Acc:MGI:88228]	protein_coding	R_MMU_977606(Regulation_of_Complement_cascade);R_MMU_8957275(Post_translational_protein_phosphorylation);R_MMU_174577(Activation_of_C3_and_C5);R_MMU_166663(Initial_triggering_of_complement);R_MMU_166658(Complement_cascade);R_MMU_597592(Post_translational_protein_modification);R_MMU_392499(Metabolism_of_proteins);R_MMU_168256(Immune_System);R_MMU_168249(Innate_Immune_System);R_MMU_381426(Regulatio…	138.371	137.282	126.576	74.1247	68.4414	79.0776	1.81476	0.859775	1.8886e-20	2.62531e-17	up	no
23	0	MT	+	8607	9390	ENSMUST00000082409	1	784	ENSMUSG00000064358	mt-Co3	GO:0004129(cytochrome-c oxidase activity);GO:0005739(mitochondrion);GO:0005743(mitochondrial inner membrane);GO:0006123(mitochondrial electron transport, cytochrome c to oxygen);GO:0008535(respiratory chain complex IV assembly);GO:0009055(electron transfer activity);GO:0009060(aerobic respiration);GO:0015002(heme-copper terminal oxidase activity);GO:0015453(oxidoreduction-driven active transmembr…	00190(Oxidative phosphorylation);04260(Cardiac muscle contraction);04714(Thermogenesis);04932(Non-alcoholic fatty liver disease (NAFLD));05010(Alzheimer disease);05012(Parkinson disease);05016(Huntington disease)	K02262	NA	mitochondrially encoded cytochrome c oxidase III [Source:MGI Symbol;Acc:MGI:102502]	protein_coding	R_MMU_9711123(Cellular_response_to_chemical_stress);R_MMU_1430728(Metabolism);R_MMU_2262752(Cellular_responses_to_stress);R_MMU_73857(RNA_Polymerase_II_Transcription);R_MMU_212436(Generic_Transcription_Pathway);R_MMU_8953897(Cellular_responses_to_external_stimuli);R_MMU_3700989(Transcriptional_Regulation_by_TP53);R_MMU_5628897(TP53_Regulates_Metabolic_Genes);R_MMU_9707564(Cytoprotection_by_HMOX1)…	3361.74	3558.63	3380.34	4338.91	4481.22	4067.96	0.799243	-0.323295	2.32176e-20	3.17621e-17	down	no
129728	0	chr8	-	39603454	39642673	ENSMUST00000170091	9	3636	ENSMUSG00000025044	Msr1	GO:0001540(amyloid-beta binding);GO:0005044(scavenger receptor activity);GO:0005581(collagen trimer);GO:0005829(cytosol);GO:0005886(plasma membrane);GO:0006897(endocytosis);GO:0006898(receptor-mediated endocytosis);GO:0006911(phagocytosis, engulfment);GO:0009897(external side of plasma membrane);GO:0010629(negative regulation of gene expression);GO:0010744(positive regulation of macrophage derive…	04145(Phagosome)	K06558	NA	macrophage scavenger receptor 1 [Source:MGI Symbol;Acc:MGI:98257]	protein_coding	R_MMU_5653656(Vesicle_mediated_transport);R_MMU_3000480(Scavenging_by_Class_A_Receptors);R_MMU_2173782(Binding_and_Uptake_of_Ligands_by_Scavenger_Receptors)	2.63505	2.59101	1.8213	7.48638	6.84492	7.59901	0.321352	-1.63777	4.74513e-20	6.38998e-17	down	yes
442	0	X	-	9435252	9469324	ENSMUST00000015484	13	4752	ENSMUSG00000015340	Cybb	GO:0005244(voltage-gated ion channel activity);GO:0005515(protein binding);GO:0005635(nuclear envelope);GO:0005737(cytoplasm);GO:0005739(mitochondrion);GO:0005783(endoplasmic reticulum);GO:0005791(rough endoplasmic reticulum);GO:0005794(Golgi apparatus);GO:0005886(plasma membrane);GO:0005887(integral component of plasma membrane);GO:0006801(superoxide metabolic process);GO:0006811(ion transport);…	04066(HIF-1 signaling pathway);04145(Phagosome);04216(Ferroptosis);04217(Necroptosis);04621(NOD-like receptor signaling pathway);04670(Leukocyte transendothelial migration);04933(AGE-RAGE signaling pathway in diabetic complications);05140(Leishmaniasis)	K21421	EC:1.-.-.-	cytochrome b-245, beta polypeptide [Source:MGI Symbol;Acc:MGI:88574]	protein_coding	R_MMU_9013423(RAC3_GTPase_cycle);R_MMU_9012999(RHO_GTPase_cycle);R_MMU_4420097(VEGFA_VEGFR2_Pathway);R_MMU_9013404(RAC2_GTPase_cycle);R_MMU_9711123(Cellular_response_to_chemical_stress);R_MMU_1222556(ROS_and_RNS_production_in_phagocytes);R_MMU_2262752(Cellular_responses_to_stress);R_MMU_1236975(Antigen_processing_Cross_presentation);R_MMU_8953897(Cellular_responses_to_external_stimuli);R_MMU_5668…	3.16886	3.08552	2.73102	7.09421	6.11718	7.2388	0.43938	-1.18646	5.09327e-20	6.75329e-17	down	yes
140888	0	chr9	-	107614125	107635312	ENSMUST00000192615	9	1777	ENSMUSG00000032562	Gnai2	GO:0000166(nucleotide binding);GO:0001664(G protein-coupled receptor binding);GO:0001973(G protein-coupled adenosine receptor signaling pathway);GO:0003924(GTPase activity);GO:0005515(protein binding);GO:0005525(GTP binding);GO:0005634(nucleus);GO:0005654(nucleoplasm);GO:0005737(cytoplasm);GO:0005813(centrosome);GO:0005815(microtubule organizing center);GO:0005829(cytosol);GO:0005834(heterotrimer…	04015(Rap1 signaling pathway);04022(cGMP-PKG signaling pathway);04024(cAMP signaling pathway);04062(Chemokine signaling pathway);04071(Sphingolipid signaling pathway);04261(Adrenergic signaling in cardiomyocytes);04360(Axon guidance);04371(Apelin signaling pathway);04540(Gap junction);04611(Platelet activation);04670(Leukocyte transendothelial migration);04713(Circadian entrainment);04723(Retrogr…	K04630	NA	guanine nucleotide binding protein (G protein), alpha inhibiting 2 [Source:MGI Symbol;Acc:MGI:95772]	protein_coding	R_MMU_163685(Integration_of_energy_metabolism);R_MMU_112040(G_protein_mediated_events);R_MMU_112315(Transmission_across_Chemical_Synapses);R_MMU_170670(Adenylate_cyclase_inhibitory_pathway);R_MMU_109582(Hemostasis);R_MMU_1430728(Metabolism);R_MMU_977443(GABA_receptor_activation);R_MMU_392518(Signal_amplification);R_MMU_9009391(Extra_nuclear_estrogen_signaling);R_MMU_977444(GABA_B_receptor_activat…	16.672	15.447	14.5929	7.16771	6.09928	7.10363	2.2931	1.1973	6.29501e-20	8.22024e-17	up	yes
94319	0	chr4	+	107367784	107416346	ENSMUST00000139560	18	4584	ENSMUSG00000028614	Ndc1	GO:0005634(nucleus);GO:0005643(nuclear pore);GO:0005737(cytoplasm);GO:0005886(plasma membrane);GO:0006913(nucleocytoplasmic transport);GO:0006999(nuclear pore organization);GO:0007129(synapsis);GO:0007283(spermatogenesis);GO:0015031(protein transport);GO:0015629(actin cytoskeleton);GO:0016020(membrane);GO:0016021(integral component of membrane);GO:0017056(structural constituent of nuclear pore);G…	03013(RNA transport)	K14315	NA	NDC1 transmembrane nucleoporin [Source:MGI Symbol;Acc:MGI:1920037]	protein_coding	R_MMU_3301854(Nuclear_Pore_Complex_(NPC)_Disassembly);R_MMU_3371453(Regulation_of_HSF1_mediated_heat_shock_response);R_MMU_4551638(SUMOylation_of_chromatin_organization_proteins);R_MMU_72203(Processing_of_Capped_Intron_Containing_Pre_mRNA);R_MMU_71387(Metabolism_of_carbohydrates);R_MMU_1430728(Metabolism);R_MMU_211000(Gene_Silencing_by_RNA);R_MMU_2262752(Cellular_responses_to_stress);R_MMU_323214…	4.71699	4.31682	4.86999	8.73869	9.33946	8.14026	0.530307	-0.915102	6.44387e-20	8.28903e-17	down	no
8123	0	chr1	-	24613189	24613971	ENSMUST00000190277	1	783	ENSMUSG00000101111	Gm28437	NA	NA	NA	NA	predicted gene 28437 [Source:MGI Symbol;Acc:MGI:5579143]	unprocessed_pseudogene	NA	3358.79	3553.06	3377.12	4334.54	4475.72	4054.91	0.799754	-0.322371	9.07424e-20	1.15009e-16	down	no
30233	0	chr11	-	114982274	114989922	ENSMUST00000045075	4	2645	ENSMUSG00000034641	Cd300ld	GO:0001618(virus receptor activity);GO:0002376(immune system process);GO:0005515(protein binding);GO:0005886(plasma membrane);GO:0016020(membrane);GO:0016021(integral component of membrane);GO:0032675(regulation of interleukin-6 production);GO:0032680(regulation of tumor necrosis factor production);GO:0046718(viral entry into host cell)	NA	K20395	NA	CD300 molecule like family member d [Source:MGI Symbol;Acc:MGI:2442358]	protein_coding	NA	1.76757	1.57922	1.47507	4.54453	4.00521	4.59031	0.366959	-1.44631	1.28898e-19	1.61001e-16	down	yes
112855	0	chr6	-	113424634	113435760	ENSMUST00000113089	6	1720	ENSMUSG00000030278	Cidec	GO:0003674(molecular_function);GO:0005634(nucleus);GO:0005783(endoplasmic reticulum);GO:0005811(lipid droplet);GO:0005829(cytosol);GO:0006915(apoptotic process);GO:0034389(lipid droplet organization);GO:0042981(regulation of apoptotic process);GO:0097194(execution phase of apoptosis)	NA	NA	NA	cell death-inducing DFFA-like effector c [Source:MGI Symbol;Acc:MGI:95585]	protein_coding	R_MMU_8964572(Lipid_particle_organization);R_MMU_556833(Metabolism_of_lipids);R_MMU_1430728(Metabolism)	99.5325	96.2695	99.0651	156.472	144.916	153.865	0.647699	-0.626605	1.39639e-19	1.71926e-16	down	no
107416	0	chr5	+	149264767	149288153	ENSMUST00000071130	5	1251	ENSMUSG00000060063	Alox5ap	GO:0002540(leukotriene production involved in inflammatory response);GO:0002675(positive regulation of acute inflammatory response);GO:0004051(arachidonate 5-lipoxygenase activity);GO:0004364(glutathione transferase activity);GO:0004464(leukotriene-C4 synthase activity);GO:0004602(glutathione peroxidase activity);GO:0005515(protein binding);GO:0005634(nucleus);GO:0005635(nuclear envelope);GO:0005…	04664(Fc epsilon RI signaling pathway)	NA	NA	arachidonate 5-lipoxygenase activating protein [Source:MGI Symbol;Acc:MGI:107505]	protein_coding	R_MMU_2142700(Synthesis_of_Lipoxins_(LX));R_MMU_2142688(Synthesis_of_5_eicosatetraenoic_acids);R_MMU_556833(Metabolism_of_lipids);R_MMU_1430728(Metabolism);R_MMU_8978868(Fatty_acid_metabolism);R_MMU_9018678(Biosynthesis_of_specialized_proresolving_mediators_(SPMs));R_MMU_2142753(Arachidonic_acid_metabolism);R_MMU_2142691(Synthesis_of_Leukotrienes_(LT)_and_Eoxins_(EX))	1.21914	1.94027	1.2931	6.77315	6.39256	7.58563	0.214565	-2.22051	1.55868e-19	1.89204e-16	down	yes
96898	0	chr4	-	136895917	136898803	ENSMUST00000046285	3	1040	ENSMUSG00000036887	C1qa	GO:0001774(microglial cell activation);GO:0002376(immune system process);GO:0005515(protein binding);GO:0005576(extracellular region);GO:0005581(collagen trimer);GO:0005615(extracellular space);GO:0006958(complement activation, classical pathway);GO:0007568(aging);GO:0010039(response to iron ion);GO:0016322(neuron remodeling);GO:0045087(innate immune response);GO:0045202(synapse);GO:0048143(astro…	04610(Complement and coagulation cascades);05020(Prion diseases);05133(Pertussis);05142(Chagas disease (American trypanosomiasis));05150(Staphylococcus aureus infection);05322(Systemic lupus erythematosus)	K03986	NA	complement component 1, q subcomponent, alpha polypeptide [Source:MGI Symbol;Acc:MGI:88223]	protein_coding	R_MMU_977606(Regulation_of_Complement_cascade);R_MMU_173623(Classical_antibody_mediated_complement_activation);R_MMU_166663(Initial_triggering_of_complement);R_MMU_166658(Complement_cascade);R_MMU_168256(Immune_System);R_MMU_166786(Creation_of_C4_and_C2_activators);R_MMU_168249(Innate_Immune_System)	5.10764	5.58446	3.25492	22.3747	19.282	27.1482	0.202704	-2.30256	2.18057e-19	2.61018e-16	down	yes
25974	0	chr11	-	69664213	69666153	ENSMUST00000018918	6	1230	ENSMUSG00000018774	Cd68	GO:0002437(inflammatory response to antigenic stimulus);GO:0002605(negative regulation of dendritic cell antigen processing and presentation);GO:0005764(lysosome);GO:0005765(lysosomal membrane);GO:0005768(endosome);GO:0005886(plasma membrane);GO:0007568(aging);GO:0010008(endosome membrane);GO:0016020(membrane);GO:0016021(integral component of membrane);GO:0031669(cellular response to nutrient lev…	04142(Lysosome)	K06501	NA	CD68 antigen [Source:MGI Symbol;Acc:MGI:88342]	protein_coding	R_MMU_168256(Immune_System);R_MMU_6798695(Neutrophil_degranulation);R_MMU_168249(Innate_Immune_System)	35.9159	33.6579	29.7528	74.1424	66.3276	80.5324	0.449437	-1.15381	2.71493e-19	3.20529e-16	down	yes
80140	0	chr2	+	121956411	122012388	ENSMUST00000110578	13	3386	ENSMUSG00000033411	Ctdspl2	GO:0000790(nuclear chromatin);GO:0004721(phosphoprotein phosphatase activity);GO:0005634(nucleus);GO:0005654(nucleoplasm);GO:0006470(protein dephosphorylation);GO:0008420(RNA polymerase II CTD heptapeptide repeat phosphatase activity);GO:0016787(hydrolase activity);GO:0016791(phosphatase activity);GO:0030514(negative regulation of BMP signaling pathway);GO:0046827(positive regulation of protein e…	NA	K17616	EC:3.1.3.-	CTD (carboxy-terminal domain, RNA polymerase II, polypeptide A) small phosphatase like 2 [Source:MGI Symbol;Acc:MGI:1196405]	protein_coding	NA	0	0	0	1.62837	1.05035	1.78427	6.72196e-05	-13.8608	4.23102e-19	4.92771e-16	down	yes
108166	0	chr6	+	22288230	22298522	ENSMUST00000031681	4	1663	ENSMUSG00000029671	Wnt16	GO:0005102(signaling receptor binding);GO:0005109(frizzled binding);GO:0005125(cytokine activity);GO:0005576(extracellular region);GO:0005615(extracellular space);GO:0005737(cytoplasm);GO:0007275(multicellular organism development);GO:0010628(positive regulation of gene expression);GO:0014068(positive regulation of phosphatidylinositol 3-kinase signaling);GO:0016055(Wnt signaling pathway);GO:0030…	04150(mTOR signaling pathway);04310(Wnt signaling pathway);04390(Hippo signaling pathway);04550(Signaling pathways regulating pluripotency of stem cells);04916(Melanogenesis);04934(Cushing syndrome);05165(Human papillomavirus infection);05200(Pathways in cancer);05202(Transcriptional misregulation in cancer);05205(Proteoglycans in cancer);05217(Basal cell carcinoma);05224(Breast cancer);05225(Hep…	K01558	NA	wingless-type MMTV integration site family, member 16 [Source:MGI Symbol;Acc:MGI:2136018]	protein_coding	R_MMU_195721(Signaling_by_WNT);R_MMU_3238698(WNT_ligand_biogenesis_and_trafficking);R_MMU_162582(Signal_Transduction)	9.17296	10.1733	10.6568	3.83689	4.05735	4.48856	2.42296	1.27677	5.58305e-19	6.41567e-16	up	yes
89561	0	chr3	-	126923325	127225847	ENSMUST00000182064	46	12413	ENSMUSG00000032826	Ank2	GO:0002027(regulation of heart rate);GO:0003283(atrial septum development);GO:0005200(structural constituent of cytoskeleton);GO:0005515(protein binding);GO:0005737(cytoplasm);GO:0005739(mitochondrion);GO:0005764(lysosome);GO:0005768(endosome);GO:0005769(early endosome);GO:0005856(cytoskeleton);GO:0005886(plasma membrane);GO:0005887(integral component of plasma membrane);GO:0006874(cellular calci…	05205(Proteoglycans in cancer)	K10380	NA	ankyrin 2, brain [Source:MGI Symbol;Acc:MGI:88025]	protein_coding	NA	0.259997	0.32848	0.303358	0	0	0	2972.78	11.5376	3.3212e-18	3.76628e-15	up	yes
12167	0	chr1	-	120474538	120505024	ENSMUST00000027639	17	1925	ENSMUSG00000026390	Marco	GO:0001540(amyloid-beta binding);GO:0001664(G protein-coupled receptor binding);GO:0001934(positive regulation of protein phosphorylation);GO:0002376(immune system process);GO:0005044(scavenger receptor activity);GO:0005581(collagen trimer);GO:0005737(cytoplasm);GO:0005886(plasma membrane);GO:0006897(endocytosis);GO:0006898(receptor-mediated endocytosis);GO:0006911(phagocytosis, engulfment);GO:00…	04145(Phagosome)	K13884	NA	macrophage receptor with collagenous structure [Source:MGI Symbol;Acc:MGI:1309998]	protein_coding	R_MMU_5653656(Vesicle_mediated_transport);R_MMU_3000480(Scavenging_by_Class_A_Receptors);R_MMU_2173782(Binding_and_Uptake_of_Ligands_by_Scavenger_Receptors)	0.458719	0.889333	0.394857	6.10299	4.07448	5.1059	0.114039	-3.13239	4.69242e-18	5.25216e-15	down	yes
59366	0	chr17	-	24595937	24632629	ENSMUST00000097373	40	6018	ENSMUSG00000002496	Tsc2	GO:0005096(GTPase activator activity);GO:0005634(nucleus);GO:0005737(cytoplasm);GO:0005764(lysosome);GO:0005794(Golgi apparatus);GO:0005829(cytosol);GO:0016020(membrane);GO:0016239(positive regulation of macroautophagy);GO:0019902(phosphatase binding);GO:0031267(small GTPase binding);GO:0032007(negative regulation of TOR signaling);GO:0033596(TSC1-TSC2 complex);GO:0042803(protein homodimerization…	04072(Phospholipase D signaling pathway);04115(p53 signaling pathway);04140(Autophagy - animal);04150(mTOR signaling pathway);04151(PI3K-Akt signaling pathway);04152(AMPK signaling pathway);04211(Longevity regulating pathway);04218(Cellular senescence);04714(Thermogenesis);04910(Insulin signaling pathway);04919(Thyroid hormone signaling pathway);05163(Human cytomegalovirus infection);05165(Human …	K07207	NA	TSC complex subunit 2 [Source:MGI Symbol;Acc:MGI:102548]	protein_coding	R_MMU_5653656(Vesicle_mediated_transport);R_MMU_73857(RNA_Polymerase_II_Transcription);R_MMU_212436(Generic_Transcription_Pathway);R_MMU_380972(Energy_dependent_regulation_of_mTOR_by_LKB1_AMPK);R_MMU_1257604(PIP3_activates_AKT_signaling);R_MMU_9612973(Autophagy);R_MMU_3700989(Transcriptional_Regulation_by_TP53);R_MMU_5628897(TP53_Regulates_Metabolic_Genes);R_MMU_199991(Membrane_Trafficking);R_MMU…	0.434693	0.352326	0.433785	1.46165	1.35571	1.14799	0.307868	-1.69962	5.08635e-18	5.62009e-15	down	yes
61311	0	chr17	+	33528314	33553448	ENSMUST00000173013	23	3733	ENSMUSG00000024299	Adamts10	GO:0001527(microfibril);GO:0004222(metalloendopeptidase activity);GO:0005576(extracellular region);GO:0006508(proteolysis);GO:0008233(peptidase activity);GO:0008237(metallopeptidase activity);GO:0016787(hydrolase activity);GO:0030198(extracellular matrix organization);GO:0031012(extracellular matrix);GO:0046872(metal ion binding);GO:0062023(collagen-containing extracellular matrix)	NA	K08625	EC:3.4.24.-	a disintegrin-like and metallopeptidase (reprolysin type) with thrombospondin type 1 motif, 10 [Source:MGI Symbol;Acc:MGI:2449112]	nonsense_mediated_decay	R_MMU_5173105(O_linked_glycosylation);R_MMU_597592(Post_translational_protein_modification);R_MMU_392499(Metabolism_of_proteins);R_MMU_5173214(O_glycosylation_of_TSR_domain_containing_proteins)	1.26799	1.47277	1.17772	0.413976	0.369529	0.352145	3.45042	1.78677	6.4058e-18	6.98841e-15	up	yes
67854	0	chr18	-	67665512	67724588	ENSMUST00000025420	10	1568	ENSMUSG00000024539	Ptpn2	GO:0000122(negative regulation of transcription by RNA polymerase II);GO:0004721(phosphoprotein phosphatase activity);GO:0004725(protein tyrosine phosphatase activity);GO:0004726(non-membrane spanning protein tyrosine phosphatase activity);GO:0005178(integrin binding);GO:0005515(protein binding);GO:0005634(nucleus);GO:0005654(nucleoplasm);GO:0005737(cytoplasm);GO:0005783(endoplasmic reticulum);GO…	04630(Jak-STAT signaling pathway)	K18026	EC:3.1.3.48	protein tyrosine phosphatase, non-receptor type 2 [Source:MGI Symbol;Acc:MGI:97806]	protein_coding	R_MMU_877300(Interferon_gamma_signaling);R_MMU_6807004(Negative_regulation_of_MET_activity);R_MMU_168256(Immune_System);R_MMU_1280215(Cytokine_Signaling_in_Immune_system);R_MMU_9006934(Signaling_by_Receptor_Tyrosine_Kinases);R_MMU_6806834(Signaling_by_MET);R_MMU_913531(Interferon_Signaling);R_MMU_162582(Signal_Transduction);R_MMU_877312(Regulation_of_IFNG_signaling)	1.6805	1.0997	1.25582	9.31908	8.65966	5.37786	0.1728	-2.53282	1.10277e-17	1.18803e-14	down	yes
69160	0	chr19	+	5088545	5092505	ENSMUST00000238093	7	1018	ENSMUSG00000024875	Yif1a	GO:0000139(Golgi membrane);GO:0003674(molecular_function);GO:0005783(endoplasmic reticulum);GO:0005789(endoplasmic reticulum membrane);GO:0005793(endoplasmic reticulum-Golgi intermediate compartment);GO:0005794(Golgi apparatus);GO:0006888(endoplasmic reticulum to Golgi vesicle-mediated transport);GO:0015031(protein transport);GO:0016020(membrane);GO:0016021(integral component of membrane);GO:0016…	NA	K20362	NA	Yip1 interacting factor homolog A (S. cerevisiae) [Source:MGI Symbol;Acc:MGI:1915340]	protein_coding	NA	5.17709	4.80233	2.59461	0	0	0	41913.4	15.3551	1.29215e-17	1.37486e-14	up	yes
85429	0	chr3	+	54361125	54391034	ENSMUST00000073012	22	3189	ENSMUSG00000027750	Postn	GO:0001666(response to hypoxia);GO:0001953(negative regulation of cell-matrix adhesion);GO:0003073(regulation of systemic arterial blood pressure);GO:0005201(extracellular matrix structural constituent);GO:0005515(protein binding);GO:0005576(extracellular region);GO:0005615(extracellular space);GO:0005737(cytoplasm);GO:0005794(Golgi apparatus);GO:0005802(trans-Golgi network);GO:0007155(cell adhes…	NA	NA	NA	periostin, osteoblast specific factor [Source:MGI Symbol;Acc:MGI:1926321]	protein_coding	NA	79.5937	74.3938	77.681	122.027	112.787	116.913	0.658661	-0.602393	1.57457e-17	1.65493e-14	down	no
4926	0	X	-	162857057	162888447	ENSMUST00000033723	9	2087	ENSMUSG00000031357	Syap1	GO:0005515(protein binding);GO:0005634(nucleus);GO:0005654(nucleoplasm);GO:0005737(cytoplasm);GO:0005794(Golgi apparatus);GO:0005829(cytosol);GO:0005886(plasma membrane);GO:0016020(membrane);GO:0030054(cell junction);GO:0030154(cell differentiation);GO:0030424(axon);GO:0030425(dendrite);GO:0030426(growth cone);GO:0031234(extrinsic component of cytoplasmic side of plasma membrane);GO:0032869(cellu…	NA	NA	NA	synapse associated protein 1 [Source:MGI Symbol;Acc:MGI:1914293]	protein_coding	NA	45.6349	50.5779	46.8136	63.4514	65.0434	61.9685	0.75094	-0.413231	2.23385e-17	2.31957e-14	down	no
83242	0	chr2	-	173213735	173218910	ENSMUST00000109116	4	770	ENSMUSG00000027514	Zbp1	GO:0002218(activation of innate immune response);GO:0002376(immune system process);GO:0003677(DNA binding);GO:0003692(left-handed Z-DNA binding);GO:0003723(RNA binding);GO:0003725(double-stranded RNA binding);GO:0005515(protein binding);GO:0005634(nucleus);GO:0005737(cytoplasm);GO:0005829(cytosol);GO:0006915(apoptotic process);GO:0012501(programmed cell death);GO:0016032(viral process);GO:0042802…	04217(Necroptosis);04623(Cytosolic DNA-sensing pathway)	K12965	NA	Z-DNA binding protein 1 [Source:MGI Symbol;Acc:MGI:1927449]	protein_coding	NA	34.784	29.2506	44.9999	5.18094	8.21573	8.48486	4.98295	2.317	3.47188e-17	3.56219e-14	up	yes
80687	0	chr2	-	130390775	130397574	ENSMUST00000028897	14	2366	ENSMUSG00000027408	Cpxm1	GO:0004181(metallocarboxypeptidase activity);GO:0005576(extracellular region);GO:0005615(extracellular space);GO:0006508(proteolysis);GO:0006518(peptide metabolic process);GO:0008270(zinc ion binding);GO:0016485(protein processing);GO:0016787(hydrolase activity);GO:0046872(metal ion binding)	NA	K08638	EC:3.4.17.-	carboxypeptidase X 1 (M14 family) [Source:MGI Symbol;Acc:MGI:1934569]	protein_coding	NA	101.414	88.9137	107.552	40.5079	48.38	48.8275	2.16301	1.11304	3.94226e-17	3.99722e-14	up	yes
90565	0	chr3	-	151730922	151749960	ENSMUST00000029671	8	2910	ENSMUSG00000028037	Ifi44	GO:0003674(molecular_function);GO:0005737(cytoplasm);GO:0006955(immune response);GO:0009617(response to bacterium)	NA	NA	NA	interferon-induced protein 44 [Source:MGI Symbol;Acc:MGI:2443016]	protein_coding	NA	24.3961	28.4214	45.345	6.12538	5.17577	7.95938	5.09656	2.34952	4.62176e-17	4.63171e-14	up	yes
14699	0	chr1	+	171839697	171890718	ENSMUST00000155802	9	3291	ENSMUSG00000038147	Cd84	GO:0005886(plasma membrane);GO:0016020(membrane);GO:0016021(integral component of membrane);GO:0032685(negative regulation of granulocyte macrophage colony-stimulating factor production);GO:0032701(negative regulation of interleukin-18 production);GO:0033004(negative regulation of mast cell activation);GO:0042802(identical protein binding);GO:0043231(intracellular membrane-bounded organelle);GO:0…	NA	K06511	NA	CD84 antigen [Source:MGI Symbol;Acc:MGI:1336885]	protein_coding	R_MMU_109582(Hemostasis);R_MMU_202733(Cell_surface_interactions_at_the_vascular_wall)	3.2983	2.70104	2.54404	6.63664	6.77647	7.13267	0.415822	-1.26596	5.83157e-17	5.77694e-14	down	yes
128525	0	chr8	-	12614277	12672099	ENSMUST00000164774	21	3515	ENSMUSG00000000759	Tubgcp3	GO:0000226(microtubule cytoskeleton organization);GO:0000278(mitotic cell cycle);GO:0000922(spindle pole);GO:0000923(equatorial microtubule organizing center);GO:0000930(gamma-tubulin complex);GO:0005737(cytoplasm);GO:0005813(centrosome);GO:0005814(centriole);GO:0005815(microtubule organizing center);GO:0005827(polar microtubule);GO:0005856(cytoskeleton);GO:0005874(microtubule);GO:0007020(microtu…	NA	K16570	NA	tubulin, gamma complex associated protein 3 [Source:MGI Symbol;Acc:MGI:2183752]	nonsense_mediated_decay	R_MMU_380287(Centrosome_maturation);R_MMU_1640170(Cell_Cycle);R_MMU_380270(Recruitment_of_mitotic_centrosome_proteins_and_complexes);R_MMU_69278(Cell_Cycle,_Mitotic);R_MMU_453274(Mitotic_G2_G2/M_phases);R_MMU_68886(M_Phase);R_MMU_380320(Recruitment_of_NuMA_to_mitotic_centrosomes);R_MMU_68877(Mitotic_Prometaphase);R_MMU_69275(G2/M_Transition)	1.15204	0.696012	1.01531	0	0	0	9544.54	13.2205	6.42792e-17	6.29535e-14	up	yes
67299	0	chr18	+	60441765	60442980	ENSMUST00000073997	1	1216	ENSMUSG00000063388	BC023105	NA	NA	NA	NA	cDNA sequence BC023105 [Source:MGI Symbol;Acc:MGI:2384767]	processed_pseudogene	NA	27.1491	32.7051	53.5298	8.94747	6.70679	6.56066	5.10396	2.35162	8.43585e-17	8.16903e-14	up	yes
27456	0	chr11	+	82101845	82103400	ENSMUST00000000194	3	537	ENSMUSG00000035352	Ccl12	GO:0000165(MAPK cascade);GO:0001525(angiogenesis);GO:0002548(monocyte chemotaxis);GO:0002687(positive regulation of leukocyte migration);GO:0005125(cytokine activity);GO:0005576(extracellular region);GO:0005615(extracellular space);GO:0006935(chemotaxis);GO:0006954(inflammatory response);GO:0006955(immune response);GO:0007010(cytoskeleton organization);GO:0007165(signal transduction);GO:0007186(G…	04060(Cytokine-cytokine receptor interaction);04062(Chemokine signaling pathway);04621(NOD-like receptor signaling pathway);04657(IL-17 signaling pathway);04668(TNF signaling pathway);04933(AGE-RAGE signaling pathway in diabetic complications);05142(Chagas disease (American trypanosomiasis));05144(Malaria);05163(Human cytomegalovirus infection);05164(Influenza A);05168(Herpes simplex virus 1 infe…	K14624	NA	chemokine (C-C motif) ligand 12 [Source:MGI Symbol;Acc:MGI:108224]	protein_coding	R_MMU_373076(Class_A/1_(Rhodopsin_like_receptors));R_MMU_380108(Chemokine_receptors_bind_chemokines);R_MMU_375276(Peptide_ligand_binding_receptors);R_MMU_500792(GPCR_ligand_binding);R_MMU_372790(Signaling_by_GPCR);R_MMU_162582(Signal_Transduction)	1.12899	0.576218	1.21312	8.06884	7.36943	7.63295	0.126492	-2.98288	8.84773e-17	8.47269e-14	down	yes
55166	0	chr16	+	23609925	23613714	ENSMUST00000211349	2	842	ENSMUSG00000033355	Rtp4	GO:0001580(detection of chemical stimulus involved in sensory perception of bitter taste);GO:0005515(protein binding);GO:0005737(cytoplasm);GO:0006612(protein targeting to membrane);GO:0016020(membrane);GO:0016021(integral component of membrane);GO:0031849(olfactory receptor binding);GO:0051205(protein insertion into membrane);GO:0051607(defense response to virus)	NA	NA	NA	receptor transporter protein 4 [Source:MGI Symbol;Acc:MGI:1915025]	protein_coding	R_MMU_9709957(Sensory_Perception);R_MMU_381753(Olfactory_Signaling_Pathway)	13.1296	11.847	16.3037	3.30218	4.33442	3.9506	3.56258	1.83292	1.01836e-16	9.64478e-14	up	yes
64535	0	chr17	-	79706953	79715041	ENSMUST00000024894	3	5128	ENSMUSG00000024087	Cyp1b1	GO:0001525(angiogenesis);GO:0002930(trabecular meshwork development);GO:0004497(monooxygenase activity);GO:0005506(iron ion binding);GO:0005634(nucleus);GO:0005739(mitochondrion);GO:0005783(endoplasmic reticulum);GO:0005789(endoplasmic reticulum membrane);GO:0006304(DNA modification);GO:0006629(lipid metabolic process);GO:0006631(fatty acid metabolic process);GO:0006725(cellular aromatic compound…	00140(Steroid hormone biosynthesis);00380(Tryptophan metabolism);00980(Metabolism of xenobiotics by cytochrome P450);04913(Ovarian steroidogenesis);05204(Chemical carcinogenesis);05206(MicroRNAs in cancer)	K07410	EC:1.14.14.1	cytochrome P450, family 1, subfamily b, polypeptide 1 [Source:MGI Symbol;Acc:MGI:88590]	protein_coding	R_MMU_211897(Cytochrome_P450_arranged_by_substrate_type);R_MMU_556833(Metabolism_of_lipids);R_MMU_1430728(Metabolism);R_MMU_211976(Endogenous_sterols);R_MMU_8978868(Fatty_acid_metabolism);R_MMU_211945(Phase_I_Functionalization_of_compounds);R_MMU_211859(Biological_oxidations);R_MMU_2142753(Arachidonic_acid_metabolism);R_MMU_2142670(Synthesis_of_epoxy_(EET)_and_dihydroxyeicosatrienoic_acids_(DHET)…	23.2433	22.5761	22.9999	14.0981	14.1313	15.1243	1.58739	0.666658	1.12918e-16	1.05781e-13	up	no
34971	0	chr12	-	98202294	98259459	ENSMUST00000021390	17	3832	ENSMUSG00000021003	Galc	GO:0003824(catalytic activity);GO:0004336(galactosylceramidase activity);GO:0005739(mitochondrion);GO:0005764(lysosome);GO:0006629(lipid metabolic process);GO:0006665(sphingolipid metabolic process);GO:0006683(galactosylceramide catabolic process);GO:0008152(metabolic process);GO:0016042(lipid catabolic process);GO:0016787(hydrolase activity);GO:0016798(hydrolase activity, acting on glycosyl bond…	00600(Sphingolipid metabolism);04142(Lysosome)	K01202	EC:3.2.1.46	galactosylceramidase [Source:MGI Symbol;Acc:MGI:95636]	protein_coding	R_MMU_556833(Metabolism_of_lipids);R_MMU_1430728(Metabolism);R_MMU_1660662(Glycosphingolipid_metabolism);R_MMU_428157(Sphingolipid_metabolism)	6.8479	7.27387	6.39754	10.5394	11.3307	10.1419	0.640987	-0.641634	1.43177e-16	1.32685e-13	down	no
59874	0	chr17	-	26081230	26090220	ENSMUST00000237265	9	1993	ENSMUSG00000036775	Decr2	GO:0005777(peroxisome);GO:0005778(peroxisomal membrane);GO:0006629(lipid metabolic process);GO:0006631(fatty acid metabolic process);GO:0006636(unsaturated fatty acid biosynthetic process);GO:0008670(2,4-dienoyl-CoA reductase (NADPH) activity);GO:0016020(membrane);GO:0016021(integral component of membrane);GO:0016491(oxidoreductase activity);GO:0019166(trans-2-enoyl-CoA reductase (NADPH) activity…	04146(Peroxisome)	K13237	EC:1.3.1.34	2-4-dienoyl-Coenzyme A reductase 2, peroxisomal [Source:MGI Symbol;Acc:MGI:1347059]	protein_coding	R_MMU_390918(Peroxisomal_lipid_metabolism);R_MMU_9033241(Peroxisomal_protein_import);R_MMU_9609507(Protein_localization);R_MMU_556833(Metabolism_of_lipids);R_MMU_1430728(Metabolism);R_MMU_8978868(Fatty_acid_metabolism);R_MMU_390247(Beta_oxidation_of_very_long_chain_fatty_acids)	2.19806	1.12019	3.39128	0	0	0	22365.1	14.449	1.57092e-16	1.44032e-13	up	yes
102680	0	chr5	-	92321347	92328079	ENSMUST00000113093	4	2889	ENSMUSG00000029417	Cxcl9	GO:0005125(cytokine activity);GO:0005576(extracellular region);GO:0005615(extracellular space);GO:0006935(chemotaxis);GO:0006952(defense response);GO:0006954(inflammatory response);GO:0006955(immune response);GO:0007189(adenylate cyclase-activating G protein-coupled receptor signaling pathway);GO:0008009(chemokine activity);GO:0009617(response to bacterium);GO:0009897(external side of plasma memb…	04060(Cytokine-cytokine receptor interaction);04062(Chemokine signaling pathway);04620(Toll-like receptor signaling pathway)	K05416	NA	chemokine (C-X-C motif) ligand 9 [Source:MGI Symbol;Acc:MGI:1352449]	protein_coding	R_MMU_373076(Class_A/1_(Rhodopsin_like_receptors));R_MMU_380108(Chemokine_receptors_bind_chemokines);R_MMU_375276(Peptide_ligand_binding_receptors);R_MMU_500792(GPCR_ligand_binding);R_MMU_372790(Signaling_by_GPCR);R_MMU_388396(GPCR_downstream_signalling);R_MMU_162582(Signal_Transduction);R_MMU_418594(G_alpha_(i)_signalling_events)	12.9376	13.1123	21.6919	2.97395	3.63281	4.09011	4.46316	2.15806	1.84809e-16	1.6766e-13	up	yes
127385	0	chr7	-	141262706	141266421	ENSMUST00000106023	10	2237	ENSMUSG00000025498	Irf7	GO:0000976(transcription regulatory region sequence-specific DNA binding);GO:0000978(RNA polymerase II cis-regulatory region sequence-specific DNA binding);GO:0000981(DNA-binding transcription factor activity, RNA polymerase II-specific);GO:0000987(cis-regulatory region sequence-specific DNA binding);GO:0002376(immune system process);GO:0002819(regulation of adaptive immune response);GO:0003677(D…	04620(Toll-like receptor signaling pathway);04621(NOD-like receptor signaling pathway);04622(RIG-I-like receptor signaling pathway);04623(Cytosolic DNA-sensing pathway);05160(Hepatitis C);05161(Hepatitis B);05162(Measles);05164(Influenza A);05167(Kaposi sarcoma-associated herpesvirus infection);05168(Herpes simplex virus 1 infection);05169(Epstein-Barr virus infection);05203(Viral carcinogenesis)	K09447	NA	interferon regulatory factor 7 [Source:MGI Symbol;Acc:MGI:1859212]	protein_coding	R_MMU_918233(TRAF3_dependent_IRF_activation_pathway);R_MMU_936964(Activation_of_IRF3/IRF7_mediated_by_TBK1/IKK_epsilon);R_MMU_975110(TRAF6_mediated_IRF7_activation_in_TLR7/8_or_9_signaling);R_MMU_166016(Toll_Like_Receptor_4_(TLR4)_Cascade);R_MMU_168181(Toll_Like_Receptor_7/8_(TLR7/8)_Cascade);R_MMU_168928(DDX58/IFIH1_mediated_induction_of_interferon_alpha/beta);R_MMU_168898(Toll_like_Receptor_Cas…	83.4082	71.0343	73.861	22.136	21.498	31.8686	3.02378	1.59636	1.98225e-16	1.77959e-13	up	yes
10929	0	chr1	-	85576903	85598749	ENSMUST00000131950	11	2293	ENSMUSG00000070034	Sp110	GO:0002376(immune system process);GO:0003677(DNA binding);GO:0005634(nucleus);GO:0005654(nucleoplasm);GO:0006915(apoptotic process);GO:0009617(response to bacterium);GO:0043065(positive regulation of apoptotic process);GO:0045087(innate immune response)	NA	NA	NA	Sp110 nuclear body protein [Source:MGI Symbol;Acc:MGI:1923364]	retained_intron	NA	6.42669	8.25371	8.14735	2.83164	2.24218	2.85925	2.87755	1.52484	2.40208e-16	2.13426e-13	up	yes
30795	0	chr11	-	117966079	117969186	ENSMUST00000054002	2	2552	ENSMUSG00000053113	Socs3	GO:0001784(phosphotyrosine residue binding);GO:0001932(regulation of protein phosphorylation);GO:0005515(protein binding);GO:0005737(cytoplasm);GO:0005829(cytosol);GO:0005942(phosphatidylinositol 3-kinase complex);GO:0007165(signal transduction);GO:0007259(receptor signaling pathway via JAK-STAT);GO:0009968(negative regulation of signal transduction);GO:0016567(protein ubiquitination);GO:0035556(…	04120(Ubiquitin mediated proteolysis);04380(Osteoclast differentiation);04630(Jak-STAT signaling pathway);04668(TNF signaling pathway);04910(Insulin signaling pathway);04917(Prolactin signaling pathway);04920(Adipocytokine signaling pathway);04930(Type II diabetes mellitus);04931(Insulin resistance);04932(Non-alcoholic fatty liver disease (NAFLD));05160(Hepatitis C);05164(Influenza A);05168(Herpe…	K04696	NA	suppressor of cytokine signaling 3 [Source:MGI Symbol;Acc:MGI:1201791]	protein_coding	R_MMU_877300(Interferon_gamma_signaling);R_MMU_8951664(Neddylation);R_MMU_449147(Signaling_by_Interleukins);R_MMU_9006927(Signaling_by_Non_Receptor_Tyrosine_Kinases);R_MMU_6783589(Interleukin_6_family_signaling);R_MMU_597592(Post_translational_protein_modification);R_MMU_392499(Metabolism_of_proteins);R_MMU_9674555(Signaling_by_CSF3_(G_CSF));R_MMU_1059683(Interleukin_6_signaling);R_MMU_8848021(Si…	12.0262	10.6995	10.8127	6.44104	6.4011	6.10747	1.76988	0.823648	3.13494e-16	2.75699e-13	up	no
103385	0	chr5	-	107106570	107289629	ENSMUST00000031224	17	6087	ENSMUSG00000029287	Tgfbr3	GO:0001666(response to hypoxia);GO:0001837(epithelial to mesenchymal transition);GO:0005024(transforming growth factor beta-activated receptor activity);GO:0005114(type II transforming growth factor beta receptor binding);GO:0005160(transforming growth factor beta receptor binding);GO:0005615(extracellular space);GO:0005737(cytoplasm);GO:0005887(integral component of plasma membrane);GO:0006955(i…	NA	K05843	NA	transforming growth factor, beta receptor III [Source:MGI Symbol;Acc:MGI:104637]	protein_coding	NA	43.718	41.1895	43.1559	25.414	27.4397	27.7487	1.58883	0.667963	3.52528e-16	3.06895e-13	up	no
3334	0	X	+	106143229	106160493	ENSMUST00000040065	3	4060	ENSMUSG00000033777	Tlr13	GO:0002224(toll-like receptor signaling pathway);GO:0002376(immune system process);GO:0002755(MyD88-dependent toll-like receptor signaling pathway);GO:0003723(RNA binding);GO:0004888(transmembrane signaling receptor activity);GO:0005515(protein binding);GO:0005737(cytoplasm);GO:0005768(endosome);GO:0005887(integral component of plasma membrane);GO:0006954(inflammatory response);GO:0006955(immune …	NA	K18808	NA	toll-like receptor 13 [Source:MGI Symbol;Acc:MGI:3045213]	protein_coding	NA	2.34217	1.8991	2.12683	4.96824	5.23616	6.05662	0.391617	-1.35248	4.05219e-16	3.49238e-13	down	yes
112464	0	chr6	-	98929466	99028258	ENSMUST00000177437	15	2468	ENSMUSG00000030067	Foxp1	GO:0000122(negative regulation of transcription by RNA polymerase II);GO:0000976(transcription regulatory region sequence-specific DNA binding);GO:0000978(RNA polymerase II cis-regulatory region sequence-specific DNA binding);GO:0000981(DNA-binding transcription factor activity, RNA polymerase II-specific);GO:0001227(DNA-binding transcription repressor activity, RNA polymerase II-specific);GO:000…	NA	K09409	NA	forkhead box P1 [Source:MGI Symbol;Acc:MGI:1914004]	protein_coding	NA	1.09342	1.48253	0.808641	0	0	0	11281.9	13.4617	5.8239e-16	4.96963e-13	up	yes
29582	0	chr11	+	103116231	103119725	ENSMUST00000053063	1	3495	ENSMUSG00000048878	Hexim1	GO:0000122(negative regulation of transcription by RNA polymerase II);GO:0002218(activation of innate immune response);GO:0002376(immune system process);GO:0004861(cyclin-dependent protein serine/threonine kinase inhibitor activity);GO:0005515(protein binding);GO:0005634(nucleus);GO:0005654(nucleoplasm);GO:0005737(cytoplasm);GO:0007507(heart development);GO:0017069(snRNA binding);GO:0042802(ident…	NA	K15189	NA	hexamethylene bis-acetamide inducible 1 [Source:MGI Symbol;Acc:MGI:2385923]	protein_coding	NA	15.2479	15.545	14.904	20.6959	21.9345	19.6095	0.734207	-0.445742	1.61846e-15	1.36752e-12	down	no
64060	0	chr17	+	69383319	69390750	ENSMUST00000062369	3	3625	ENSMUSG00000049672	Zbtb14	GO:0000122(negative regulation of transcription by RNA polymerase II);GO:0000976(transcription regulatory region sequence-specific DNA binding);GO:0000978(RNA polymerase II cis-regulatory region sequence-specific DNA binding);GO:0001227(DNA-binding transcription repressor activity, RNA polymerase II-specific);GO:0001822(kidney development);GO:0003170(heart valve development);GO:0003279(cardiac se…	NA	NA	NA	zinc finger and BTB domain containing 14 [Source:MGI Symbol;Acc:MGI:1195345]	protein_coding	NA	0	0	0	0.492818	0.606934	0.570316	0.000179633	-12.4427	2.1888e-15	1.83147e-12	down	yes
32781	0	chr12	+	41024090	41955588	ENSMUST00000132121	7	1147	ENSMUSG00000056899	Immp2l	GO:0001541(ovarian follicle development);GO:0004252(serine-type endopeptidase activity);GO:0005739(mitochondrion);GO:0005743(mitochondrial inner membrane);GO:0006465(signal peptide processing);GO:0006508(proteolysis);GO:0006627(protein processing involved in protein targeting to mitochondrion);GO:0006801(superoxide metabolic process);GO:0006974(cellular response to DNA damage stimulus);GO:0007283…	03060(Protein export)	K09648	EC:3.4.21.-	IMP2 inner mitochondrial membrane peptidase-like (S. cerevisiae) [Source:MGI Symbol;Acc:MGI:2135611]	protein_coding	NA	0	0	0	1.51156	2.01141	2.56601	4.92694e-05	-14.3089	2.68255e-15	2.22304e-12	down	yes
90246	0	chr3	+	142560145	142573209	ENSMUST00000029935	12	2681	ENSMUSG00000028268	Gbp3	GO:0000139(Golgi membrane);GO:0000166(nucleotide binding);GO:0003924(GTPase activity);GO:0005525(GTP binding);GO:0005634(nucleus);GO:0005737(cytoplasm);GO:0005794(Golgi apparatus);GO:0005829(cytosol);GO:0005886(plasma membrane);GO:0016020(membrane);GO:0016787(hydrolase activity);GO:0020005(symbiont-containing vacuole membrane);GO:0031410(cytoplasmic vesicle);GO:0035458(cellular response to interf…	04621(NOD-like receptor signaling pathway)	K20899	NA	guanylate binding protein 3 [Source:MGI Symbol;Acc:MGI:1926263]	protein_coding	NA	3.52012	5.27995	4.10317	1.56065	1.38628	1.37346	2.98659	1.5785	3.57347e-15	2.93314e-12	up	yes
11861	0	chr1	+	105663883	105754075	ENSMUST00000039173	29	4328	ENSMUSG00000026319	Relch	GO:0005515(protein binding);GO:0005802(trans-Golgi network);GO:0032367(intracellular cholesterol transport);GO:0055037(recycling endosome)	NA	NA	NA	RAB11 binding and LisH domain, coiled-coil and HEAT repeat containing [Source:MGI Symbol;Acc:MGI:1922832]	protein_coding	NA	3.15265	3.5318	2.36071	0.978932	1.11309	0.922469	3.00056	1.58523	3.79322e-15	3.08414e-12	up	yes
71838	0	chr19	-	41766588	41802047	ENSMUST00000026150	12	5103	ENSMUSG00000025154	Arhgap19	GO:0005096(GTPase activator activity);GO:0005737(cytoplasm);GO:0005886(plasma membrane);GO:0007165(signal transduction);GO:0043231(intracellular membrane-bounded organelle);GO:0043547(positive regulation of GTPase activity);GO:0051056(regulation of small GTPase mediated signal transduction)	NA	K20640	NA	Rho GTPase activating protein 19 [Source:MGI Symbol;Acc:MGI:1918335]	protein_coding	R_MMU_8980692(RHOA_GTPase_cycle);R_MMU_9012999(RHO_GTPase_cycle);R_MMU_9716542(Signaling_by_Rho_GTPases,_Miro_GTPases_and_RHOBTB3);R_MMU_194315(Signaling_by_Rho_GTPases);R_MMU_162582(Signal_Transduction)	1.59556	2.03698	1.63053	3.51096	3.62767	3.72011	0.484685	-1.04488	4.27403e-15	3.44259e-12	down	yes
51690	0	chr15	-	82992973	83033306	ENSMUST00000231165	6	7634	ENSMUSG00000058099	Nfam1	GO:0001819(positive regulation of cytokine production);GO:0004888(transmembrane signaling receptor activity);GO:0005886(plasma membrane);GO:0007165(signal transduction);GO:0009986(cell surface);GO:0016020(membrane);GO:0016021(integral component of membrane);GO:0030183(B cell differentiation);GO:0035556(intracellular signal transduction);GO:0045121(membrane raft);GO:0045577(regulation of B cell di…	NA	NA	NA	Nfat activating molecule with ITAM motif 1 [Source:MGI Symbol;Acc:MGI:1921289]	protein_coding	R_MMU_168256(Immune_System);R_MMU_6798695(Neutrophil_degranulation);R_MMU_168249(Innate_Immune_System)	0.230765	0.195691	0.212987	0.672444	0.708882	0.857654	0.285596	-1.80795	4.3994e-15	3.51076e-12	down	yes
119829	0	chr7	-	43524216	43533171	ENSMUST00000205503	6	5728	ENSMUSG00000004609	Cd33	GO:0005886(plasma membrane);GO:0007155(cell adhesion);GO:0009897(external side of plasma membrane);GO:0016020(membrane);GO:0016021(integral component of membrane);GO:0030246(carbohydrate binding);GO:0033691(sialic acid binding)	04640(Hematopoietic cell lineage)	K06473	NA	CD33 antigen [Source:MGI Symbol;Acc:MGI:99440]	protein_coding	R_MMU_198933(Immunoregulatory_interactions_between_a_Lymphoid_and_a_non_Lymphoid_cell);R_MMU_168256(Immune_System);R_MMU_6798695(Neutrophil_degranulation);R_MMU_168249(Innate_Immune_System);R_MMU_1280218(Adaptive_Immune_System)	0.283286	0.278802	0.22029	1.06022	0.818591	0.858892	0.285778	-1.80703	5.74934e-15	4.54594e-12	down	yes
132847	0	chr8	-	104511028	104534636	ENSMUST00000162466	19	1735	ENSMUSG00000031878	Nae1	GO:0005737(cytoplasm);GO:0005769(early endosome);GO:0005886(plasma membrane);GO:0006915(apoptotic process);GO:0007049(cell cycle);GO:0008641(ubiquitin-like modifier activating enzyme activity);GO:0016020(membrane);GO:0019781(NEDD8 activating enzyme activity);GO:0031625(ubiquitin protein ligase binding);GO:0032446(protein modification by small protein conjugation);GO:0032991(protein-containing com…	05010(Alzheimer disease)	K04532	NA	NEDD8 activating enzyme E1 subunit 1 [Source:MGI Symbol;Acc:MGI:2384561]	protein_coding	R_MMU_8951664(Neddylation);R_MMU_597592(Post_translational_protein_modification);R_MMU_392499(Metabolism_of_proteins)	1.19478	1.47543	0.913154	0	0	0	11944.5	13.5441	6.49433e-15	5.08831e-12	up	yes
10831	0	chr1	-	84036296	84284645	ENSMUST00000168574	3	2664	ENSMUSG00000045658	Pid1	GO:0001933(negative regulation of protein phosphorylation);GO:0005515(protein binding);GO:0005737(cytoplasm);GO:0010628(positive regulation of gene expression);GO:0042127(regulation of cell population proliferation);GO:0044320(cellular response to leptin stimulus);GO:0045944(positive regulation of transcription by RNA polymerase II);GO:0046325(negative regulation of glucose import);GO:0046627(neg…	NA	NA	NA	phosphotyrosine interaction domain containing 1 [Source:MGI Symbol;Acc:MGI:2138391]	protein_coding	NA	0.970397	1.39361	1.12816	3.20947	3.32164	3.7111	0.340958	-1.55233	6.64542e-15	5.15978e-12	down	yes
103276	0	chr5	-	105077630	105110276	ENSMUST00000031238	11	4381	ENSMUSG00000029298	Gbp9	GO:0003924(GTPase activity);GO:0005525(GTP binding);GO:0020005(symbiont-containing vacuole membrane);GO:0031410(cytoplasmic vesicle);GO:0042832(defense response to protozoan);GO:0044406(adhesion of symbiont to host);GO:0050830(defense response to Gram-positive bacterium);GO:0071346(cellular response to interferon-gamma)	NA	K20908	NA	guanylate-binding protein 9 [Source:MGI Symbol;Acc:MGI:3605620]	protein_coding	NA	5.62605	6.93994	10.4376	1.98384	1.70014	2.02685	4.02806	2.01008	7.10967e-15	5.47096e-12	up	yes
2751	0	X	+	94367183	94417093	ENSMUST00000113895	9	1173	ENSMUSG00000079508	Apoo	GO:0000139(Golgi membrane);GO:0005576(extracellular region);GO:0005739(mitochondrion);GO:0005743(mitochondrial inner membrane);GO:0005783(endoplasmic reticulum);GO:0005789(endoplasmic reticulum membrane);GO:0005794(Golgi apparatus);GO:0005829(cytosol);GO:0016020(membrane);GO:0016021(integral component of membrane);GO:0031305(integral component of mitochondrial inner membrane);GO:0042407(cristae f…	NA	NA	NA	apolipoprotein O [Source:MGI Symbol;Acc:MGI:1915566]	protein_coding	NA	9.37972	1.34965	3.51303	0	0	0	47474.7	15.5349	7.47566e-15	5.70168e-12	up	yes
21794	0	chr10	-	121410350	121476347	ENSMUST00000026902	5	3522	ENSMUSG00000025795	Rassf3	GO:0005737(cytoplasm);GO:0005829(cytosol);GO:0005856(cytoskeleton);GO:0005874(microtubule);GO:0005886(plasma membrane);GO:0007165(signal transduction);GO:0042802(identical protein binding);GO:0042981(regulation of apoptotic process)	NA	K09852	NA	Ras association (RalGDS/AF-6) domain family member 3 [Source:MGI Symbol;Acc:MGI:2179722]	protein_coding	NA	10.2937	10.7135	9.97279	14.0741	14.8603	14.3642	0.715495	-0.482986	1.20594e-14	9.11705e-12	down	no
17798	0	chr10	+	51480677	51486313	ENSMUST00000219151	6	3008	ENSMUSG00000112023	Lilr4b	GO:0016020(membrane);GO:0016021(integral component of membrane)	NA	NA	NA	leukocyte immunoglobulin-like receptor, subfamily B, member 4B [Source:MGI Symbol;Acc:MGI:102702]	retained_intron	R_MMU_168256(Immune_System);R_MMU_6798695(Neutrophil_degranulation);R_MMU_168249(Innate_Immune_System)	2.84646	2.34514	2.31115	5.39329	5.40061	5.69065	0.455138	-1.13562	1.41455e-14	1.05386e-11	down	yes
96743	0	chr4	-	135412308	135433853	ENSMUST00000030606	5	5111	ENSMUSG00000059713	Rcan3	GO:0003676(nucleic acid binding);GO:0005737(cytoplasm);GO:0008597(calcium-dependent protein serine/threonine phosphatase regulator activity);GO:0019722(calcium-mediated signaling);GO:0019902(phosphatase binding);GO:0031013(troponin I binding);GO:0043666(regulation of phosphoprotein phosphatase activity);GO:0070884(regulation of calcineurin-NFAT signaling cascade)	NA	K17905	NA	regulator of calcineurin 3 [Source:MGI Symbol;Acc:MGI:1858220]	protein_coding	NA	1.44708	1.48098	1.47895	2.47344	2.74805	2.53311	0.56831	-0.815251	1.41843e-14	1.05386e-11	down	no
122930	0	chr7	-	89509103	89527187	ENSMUST00000207932	2	1937	ENSMUSG00000039405	Prss23	GO:0004252(serine-type endopeptidase activity);GO:0005576(extracellular region);GO:0005615(extracellular space);GO:0005634(nucleus);GO:0006508(proteolysis);GO:0008233(peptidase activity);GO:0008236(serine-type peptidase activity);GO:0016787(hydrolase activity)	NA	K09627	EC:3.4.21.-	protease, serine 23 [Source:MGI Symbol;Acc:MGI:1923703]	protein_coding	R_MMU_8957275(Post_translational_protein_phosphorylation);R_MMU_597592(Post_translational_protein_modification);R_MMU_392499(Metabolism_of_proteins);R_MMU_381426(Regulation_of_Insulin_like_Growth_Factor_(IGF)_transport_and_uptake_by_Insulin_like_Growth_Factor_Binding_Proteins_(IGFBPs))	1.66265	0.87653	0.931354	0	0	0	11568.4	13.4979	1.8189e-14	1.33984e-11	up	yes
130481	0	chr8	-	64592542	64693054	ENSMUST00000048967	9	2117	ENSMUSG00000037852	Cpe	GO:0003214(cardiac left ventricle morphogenesis);GO:0004180(carboxypeptidase activity);GO:0004181(metallocarboxypeptidase activity);GO:0005515(protein binding);GO:0005576(extracellular region);GO:0005615(extracellular space);GO:0005794(Golgi apparatus);GO:0006508(proteolysis);GO:0006518(peptide metabolic process);GO:0008233(peptidase activity);GO:0008237(metallopeptidase activity);GO:0008270(zinc…	04940(Type I diabetes mellitus)	K01294	EC:3.4.17.10	carboxypeptidase E [Source:MGI Symbol;Acc:MGI:101932]	protein_coding	NA	32.9924	31.6219	31.7498	20.0795	20.625	21.5231	1.54857	0.630941	2.46861e-14	1.80302e-11	up	no
62037	0	chr17	+	35263096	35267353	ENSMUST00000172503	7	1744	ENSMUSG00000073411	H2-D1	GO:0001916(positive regulation of T cell mediated cytotoxicity);GO:0002376(immune system process);GO:0002474(antigen processing and presentation of peptide antigen via MHC class I);GO:0002476(antigen processing and presentation of endogenous peptide antigen via MHC class Ib);GO:0002485(antigen processing and presentation of endogenous peptide antigen via MHC class I via ER pathway, TAP-dependent)…	04144(Endocytosis);04145(Phagosome);04218(Cellular senescence);04514(Cell adhesion molecules (CAMs));04612(Antigen processing and presentation);04650(Natural killer cell mediated cytotoxicity);04940(Type I diabetes mellitus);05163(Human cytomegalovirus infection);05165(Human papillomavirus infection);05166(Human T-cell leukemia virus 1 infection);05167(Kaposi sarcoma-associated herpesvirus infect…	K06751	NA	histocompatibility 2, D region locus 1 [Source:MGI Symbol;Acc:MGI:95896]	protein_coding	NA	119.365	116.521	133.395	59.5595	61.8772	71.3865	1.91513	0.937442	2.88751e-14	2.09126e-11	up	no
123753	0	chr7	-	101839988	101845317	ENSMUST00000094141	5	1067	ENSMUSG00000032725	Folr2	GO:0005542(folic acid binding);GO:0005886(plasma membrane);GO:0006620(posttranslational protein targeting to endoplasmic reticulum membrane);GO:0007155(cell adhesion);GO:0007342(fusion of sperm to egg plasma membrane involved in single fertilization);GO:0008144(drug binding);GO:0008284(positive regulation of cell population proliferation);GO:0009986(cell surface);GO:0015884(folic acid transport);…	01523(Antifolate resistance);04144(Endocytosis)	K13649	NA	folate receptor 2 (fetal) [Source:MGI Symbol;Acc:MGI:95569]	protein_coding	R_MMU_196854(Metabolism_of_vitamins_and_cofactors);R_MMU_1430728(Metabolism);R_MMU_597592(Post_translational_protein_modification);R_MMU_196849(Metabolism_of_water_soluble_vitamins_and_cofactors);R_MMU_392499(Metabolism_of_proteins);R_MMU_168256(Immune_System);R_MMU_196757(Metabolism_of_folate_and_pterines);R_MMU_6798695(Neutrophil_degranulation);R_MMU_168249(Innate_Immune_System);R_MMU_163125(Po…	5.32123	5.5565	2.938	19.1175	17.488	22.5658	0.233487	-2.09858	2.95805e-14	2.1245e-11	down	yes
23306	0	chr11	-	16971206	17008702	ENSMUST00000102881	10	4101	ENSMUSG00000020120	Plek	GO:0002244(hematopoietic progenitor cell differentiation);GO:0002576(platelet degranulation);GO:0005080(protein kinase C binding);GO:0005737(cytoplasm);GO:0005886(plasma membrane);GO:0006904(vesicle docking involved in exocytosis);GO:0007229(integrin-mediated signaling pathway);GO:0010572(positive regulation of platelet activation);GO:0010920(negative regulation of inositol phosphate biosynthetic…	NA	K19993	NA	pleckstrin [Source:MGI Symbol;Acc:MGI:1860485]	protein_coding	R_MMU_109582(Hemostasis);R_MMU_76002(Platelet_activation,_signaling_and_aggregation);R_MMU_114608(Platelet_degranulation);R_MMU_76005(Response_to_elevated_platelet_cytosolic_Ca2+)	5.09459	5.77189	5.55715	10.8883	9.43709	11.6675	0.513352	-0.96198	3.49526e-14	2.48958e-11	down	no
104681	0	chr5	-	120896256	120907521	ENSMUST00000080322	7	1885	ENSMUSG00000052776	Oas1a	GO:0000166(nucleotide binding);GO:0001730(2'-5'-oligoadenylate synthetase activity);GO:0002376(immune system process);GO:0003723(RNA binding);GO:0003725(double-stranded RNA binding);GO:0005515(protein binding);GO:0005524(ATP binding);GO:0005634(nucleus);GO:0005654(nucleoplasm);GO:0005737(cytoplasm);GO:0005739(mitochondrion);GO:0005783(endoplasmic reticulum);GO:0005829(cytosol);GO:0006164(purine n…	04621(NOD-like receptor signaling pathway);05160(Hepatitis C);05162(Measles);05164(Influenza A);05168(Herpes simplex virus 1 infection);05169(Epstein-Barr virus infection)	K14216	EC:2.7.7.84	2'-5' oligoadenylate synthetase 1A [Source:MGI Symbol;Acc:MGI:2180860]	protein_coding	NA	35.1594	34.1717	49.4475	12.4686	11.7536	15.5109	2.98941	1.57986	3.64802e-14	2.57709e-11	up	yes
61318	0	chr17	+	33555707	33607762	ENSMUST00000087605	28	3831	ENSMUSG00000024300	Myo1f	GO:0000166(nucleotide binding);GO:0003774(motor activity);GO:0003779(actin binding);GO:0005515(protein binding);GO:0005524(ATP binding);GO:0016459(myosin complex)	NA	K10356	NA	myosin IF [Source:MGI Symbol;Acc:MGI:107711]	protein_coding	NA	2.82131	2.43722	2.27436	5.61406	5.20747	6.21209	0.442236	-1.17711	4.36864e-14	3.06107e-11	down	yes
74481	0	chr2	-	26409431	26445214	ENSMUST00000114082	31	8797	ENSMUSG00000026924	Sec16a	GO:0000139(Golgi membrane);GO:0005515(protein binding);GO:0005737(cytoplasm);GO:0005783(endoplasmic reticulum);GO:0005789(endoplasmic reticulum membrane);GO:0005794(Golgi apparatus);GO:0005829(cytosol);GO:0006888(endoplasmic reticulum to Golgi vesicle-mediated transport);GO:0007029(endoplasmic reticulum organization);GO:0007030(Golgi organization);GO:0012507(ER to Golgi transport vesicle membrane…	NA	K20353	NA	SEC16 homolog A, endoplasmic reticulum export factor [Source:MGI Symbol;Acc:MGI:2139207]	protein_coding	R_MMU_5653656(Vesicle_mediated_transport);R_MMU_199977(ER_to_Golgi_Anterograde_Transport);R_MMU_948021(Transport_to_the_Golgi_and_subsequent_modification);R_MMU_597592(Post_translational_protein_modification);R_MMU_392499(Metabolism_of_proteins);R_MMU_446203(Asparagine_N_linked_glycosylation);R_MMU_204005(COPII_mediated_vesicle_transport);R_MMU_199991(Membrane_Trafficking)	13.7775	13.1922	12.3325	6.84444	4.86238	6.19956	2.19487	1.13414	4.4995e-14	3.12733e-11	up	yes
94010	0	chr4	-	101346531	101356248	ENSMUST00000144604	2	741	ENSMUSG00000086782	E130102H24Rik	NA	NA	NA	NA	RIKEN cDNA E130102H24 gene [Source:MGI Symbol;Acc:MGI:1925116]	lincRNA	NA	0	0	0	1.95074	2.21699	1.83241	4.99989e-05	-14.2877	4.66622e-14	3.21726e-11	down	yes
30921	0	chr11	+	119393100	119487415	ENSMUST00000093902	67	16716	ENSMUSG00000070327	Rnf213	GO:0001525(angiogenesis);GO:0002040(sprouting angiogenesis);GO:0004842(ubiquitin-protein transferase activity);GO:0005730(nucleolus);GO:0005737(cytoplasm);GO:0005829(cytosol);GO:0006511(ubiquitin-dependent protein catabolic process);GO:0016567(protein ubiquitination);GO:0016740(transferase activity);GO:0016787(hydrolase activity);GO:0016887(ATPase activity);GO:0046872(metal ion binding);GO:005126…	NA	K22754	EC:2.3.2.27	ring finger protein 213 [Source:MGI Symbol;Acc:MGI:1289196]	protein_coding	R_MMU_168256(Immune_System);R_MMU_983168(Antigen_processing:_Ubiquitination_&_Proteasome_degradation);R_MMU_1280218(Adaptive_Immune_System);R_MMU_983169(Class_I_MHC_mediated_antigen_processing_&_presentation)	48.2437	51.8079	69.7726	22.6326	16.2189	22.4727	2.76929	1.46951	4.77056e-14	3.2631e-11	up	yes
2887	0	X	+	99042581	99074728	ENSMUST00000036606	14	4963	ENSMUSG00000031216	Stard8	GO:0005096(GTPase activator activity);GO:0005925(focal adhesion);GO:0007165(signal transduction);GO:0008289(lipid binding);GO:0030036(actin cytoskeleton organization);GO:0030054(cell junction);GO:0035023(regulation of Rho protein signal transduction);GO:0043547(positive regulation of GTPase activity)	NA	K20632	NA	START domain containing 8 [Source:MGI Symbol;Acc:MGI:2448556]	protein_coding	R_MMU_8980692(RHOA_GTPase_cycle);R_MMU_9012999(RHO_GTPase_cycle);R_MMU_9013026(RHOB_GTPase_cycle);R_MMU_9716542(Signaling_by_Rho_GTPases,_Miro_GTPases_and_RHOBTB3);R_MMU_9013148(CDC42_GTPase_cycle);R_MMU_194315(Signaling_by_Rho_GTPases);R_MMU_162582(Signal_Transduction)	1.4603	1.6179	1.49425	2.74395	2.94985	3.1619	0.516327	-0.953642	6.07357e-14	4.12166e-11	down	no
63221	0	chr17	-	47815336	47833291	ENSMUST00000035375	5	1371	ENSMUSG00000032717	Mdfi	GO:0005515(protein binding);GO:0005634(nucleus);GO:0005737(cytoplasm);GO:0007275(multicellular organism development);GO:0008134(transcription factor binding);GO:0030154(cell differentiation);GO:0042802(identical protein binding);GO:0048704(embryonic skeletal system morphogenesis);GO:0060707(trophoblast giant cell differentiation)	NA	NA	NA	MyoD family inhibitor [Source:MGI Symbol;Acc:MGI:107687]	protein_coding	NA	1.017	1.03098	1.21077	0	0	0	10862.5	13.4071	7.23843e-14	4.87378e-11	up	yes
141380	0	chr9	+	109054863	109057207	ENSMUST00000154184	4	1038	ENSMUSG00000025647	Shisa5	GO:0005634(nucleus);GO:0005635(nuclear envelope);GO:0005783(endoplasmic reticulum);GO:0005789(endoplasmic reticulum membrane);GO:0006915(apoptotic process);GO:0016020(membrane);GO:0016021(integral component of membrane);GO:0031965(nuclear membrane);GO:0042771(intrinsic apoptotic signaling pathway in response to DNA damage by p53 class mediator);GO:0050699(WW domain binding);GO:0072332(intrinsic a…	04115(p53 signaling pathway)	K10135	NA	shisa family member 5 [Source:MGI Symbol;Acc:MGI:1915044]	protein_coding	R_MMU_8957275(Post_translational_protein_phosphorylation);R_MMU_597592(Post_translational_protein_modification);R_MMU_392499(Metabolism_of_proteins);R_MMU_381426(Regulation_of_Insulin_like_Growth_Factor_(IGF)_transport_and_uptake_by_Insulin_like_Growth_Factor_Binding_Proteins_(IGFBPs))	36.0839	38.3207	43.7241	17.0622	21.6902	17.7237	2.09166	1.06465	7.93873e-14	5.30387e-11	up	yes
136440	0	chr9	+	40686012	40785319	ENSMUST00000034522	7	4154	ENSMUSG00000032024	Clmp	GO:0003674(molecular_function);GO:0005881(cytoplasmic microtubule);GO:0005886(plasma membrane);GO:0005923(bicellular tight junction);GO:0016020(membrane);GO:0016021(integral component of membrane);GO:0030054(cell junction);GO:0048565(digestive tract development)	NA	K06789	NA	CXADR-like membrane protein [Source:MGI Symbol;Acc:MGI:1918816]	protein_coding	NA	11.992	11.8925	12.812	8.22387	8.52426	7.95746	1.48535	0.570807	8.16524e-14	5.41324e-11	up	no
83240	0	chr2	-	173206612	173218923	ENSMUST00000029018	8	1989	ENSMUSG00000027514	Zbp1	GO:0002218(activation of innate immune response);GO:0002376(immune system process);GO:0003677(DNA binding);GO:0003692(left-handed Z-DNA binding);GO:0003723(RNA binding);GO:0003725(double-stranded RNA binding);GO:0005515(protein binding);GO:0005634(nucleus);GO:0005737(cytoplasm);GO:0005829(cytosol);GO:0006915(apoptotic process);GO:0012501(programmed cell death);GO:0016032(viral process);GO:0042802…	04217(Necroptosis);04623(Cytosolic DNA-sensing pathway)	K12965	NA	Z-DNA binding protein 1 [Source:MGI Symbol;Acc:MGI:1927449]	protein_coding	NA	41.9364	35.1782	56.6011	7.52818	9.18294	13.7764	4.38591	2.13288	8.34009e-14	5.48695e-11	up	yes
42306	0	chr13	+	119462768	119486117	ENSMUST00000026519	13	2565	ENSMUSG00000062822	4833420G17Rik	GO:0003674(molecular_function);GO:0005575(cellular_component);GO:0008150(biological_process)	NA	NA	NA	RIKEN cDNA 4833420G17 gene [Source:MGI Symbol;Acc:MGI:1914642]	protein_coding	NA	4.09161	4.54357	4.89826	0.936098	1.22331	0.533013	5.02648	2.32955	8.60752e-14	5.61999e-11	up	yes
31094	0	chr11	+	120491840	120499187	ENSMUST00000026899	11	2023	ENSMUSG00000025792	Slc25a10	GO:0005654(nucleoplasm);GO:0005739(mitochondrion);GO:0005743(mitochondrial inner membrane);GO:0006817(phosphate ion transport);GO:0006839(mitochondrial transport);GO:0008272(sulfate transport);GO:0015114(phosphate ion transmembrane transporter activity);GO:0015116(sulfate transmembrane transporter activity);GO:0015117(thiosulfate transmembrane transporter activity);GO:0015131(oxaloacetate transme…	04964(Proximal tubule bicarbonate reclamation)	K13577	NA	solute carrier family 25 (mitochondrial carrier, dicarboxylate transporter), member 10 [Source:MGI Symbol;Acc:MGI:1353497]	protein_coding	R_MMU_1614558(Degradation_of_cysteine_and_homocysteine);R_MMU_71387(Metabolism_of_carbohydrates);R_MMU_1430728(Metabolism);R_MMU_70263(Gluconeogenesis);R_MMU_1614635(Sulfur_amino_acid_metabolism);R_MMU_425393(Transport_of_inorganic_cations/anions_and_amino_acids/oligopeptides);R_MMU_1614517(Sulfide_oxidation_to_sulfate);R_MMU_70326(Glucose_metabolism);R_MMU_425407(SLC_mediated_transmembrane_trans…	95.3201	91.214	88.105	123.692	131.955	120.346	0.730436	-0.45317	9.32084e-14	6.03998e-11	down	no
75219	0	chr2	+	31887291	31945246	ENSMUST00000138325	28	4664	ENSMUSG00000026840	Lamc3	GO:0000904(cell morphogenesis involved in differentiation);GO:0005576(extracellular region);GO:0005604(basement membrane);GO:0007155(cell adhesion);GO:0007601(visual perception);GO:0009887(animal organ morphogenesis);GO:0009888(tissue development);GO:0014002(astrocyte development);GO:0016020(membrane);GO:0016477(cell migration);GO:0034446(substrate adhesion-dependent cell spreading);GO:0060041(re…	04151(PI3K-Akt signaling pathway);04510(Focal adhesion);04512(ECM-receptor interaction);05145(Toxoplasmosis);05146(Amoebiasis);05165(Human papillomavirus infection);05200(Pathways in cancer);05222(Small cell lung cancer)	NA	NA	laminin gamma 3 [Source:MGI Symbol;Acc:MGI:1344394]	protein_coding	R_MMU_8875878(MET_promotes_cell_motility);R_MMU_3000157(Laminin_interactions);R_MMU_1474244(Extracellular_matrix_organization);R_MMU_9006934(Signaling_by_Receptor_Tyrosine_Kinases);R_MMU_6806834(Signaling_by_MET);R_MMU_162582(Signal_Transduction);R_MMU_8874081(MET_activates_PTK2_signaling)	0.493459	0.552585	0.551542	0.046637	0.07311	0.095928	7.40738	2.88896	9.51631e-14	6.12062e-11	up	yes
102569	0	chr5	-	90603076	90640487	ENSMUST00000202784	11	1919	ENSMUSG00000029370	Rassf6	GO:0005515(protein binding);GO:0005575(cellular_component);GO:0006915(apoptotic process);GO:0007165(signal transduction);GO:0042981(regulation of apoptotic process);GO:0043065(positive regulation of apoptotic process)	04390(Hippo signaling pathway);04392(Hippo signaling pathway - multiple species)	K09854	NA	Ras association (RalGDS/AF-6) domain family member 6 [Source:MGI Symbol;Acc:MGI:1920496]	protein_coding	NA	0.777876	0.671878	0.978841	0	0	0	8095.32	12.9829	9.74553e-14	6.22162e-11	up	yes
17817	0	chr10	+	51491018	51496609	ENSMUST00000218617	9	1378	ENSMUSG00000112148	Lilrb4a	GO:0001780(neutrophil homeostasis);GO:0002250(adaptive immune response);GO:0002376(immune system process);GO:0002437(inflammatory response to antigenic stimulus);GO:0005886(plasma membrane);GO:0006954(inflammatory response);GO:0007596(blood coagulation);GO:0009611(response to wounding);GO:0009624(response to nematode);GO:0009897(external side of plasma membrane);GO:0009991(response to extracellul…	04380(Osteoclast differentiation)	K06512	NA	leukocyte immunoglobulin-like receptor, subfamily B, member 4A [Source:MGI Symbol;Acc:MGI:102701]	nonsense_mediated_decay	R_MMU_168256(Immune_System);R_MMU_6798695(Neutrophil_degranulation);R_MMU_168249(Innate_Immune_System)	0.948891	0.527676	0.180444	7.29085	8.11711	11.6476	0.0612449	-4.02927	9.87727e-14	6.25936e-11	down	yes
104203	0	chr5	+	114896936	114912234	ENSMUST00000031542	6	3123	ENSMUSG00000029561	Oasl2	GO:0000166(nucleotide binding);GO:0001730(2'-5'-oligoadenylate synthetase activity);GO:0002376(immune system process);GO:0003723(RNA binding);GO:0003725(double-stranded RNA binding);GO:0005515(protein binding);GO:0005524(ATP binding);GO:0005634(nucleus);GO:0005654(nucleoplasm);GO:0005829(cytosol);GO:0006164(purine nucleotide biosynthetic process);GO:0006955(immune response);GO:0009615(response to…	05165(Human papillomavirus infection)	K14608	NA	2'-5' oligoadenylate synthetase-like 2 [Source:MGI Symbol;Acc:MGI:1344390]	protein_coding	NA	53.164	50.0335	84.6803	17.801	15.0271	21.0349	3.48806	1.80243	1.10541e-13	6.95402e-11	up	yes
15547	0	chr1	-	185284726	185329396	ENSMUST00000027921	23	5471	ENSMUSG00000026618	Iars2	GO:0000049(tRNA binding);GO:0000166(nucleotide binding);GO:0002161(aminoacyl-tRNA editing activity);GO:0004812(aminoacyl-tRNA ligase activity);GO:0004822(isoleucine-tRNA ligase activity);GO:0005524(ATP binding);GO:0005739(mitochondrion);GO:0005759(mitochondrial matrix);GO:0005829(cytosol);GO:0006412(translation);GO:0006418(tRNA aminoacylation for protein translation);GO:0006428(isoleucyl-tRNA ami…	00970(Aminoacyl-tRNA biosynthesis)	K01870	EC:6.1.1.5	isoleucine-tRNA synthetase 2, mitochondrial [Source:MGI Symbol;Acc:MGI:1919586]	protein_coding	NA	19.8854	21.6485	19.7369	26.8675	26.3135	26.3161	0.770728	-0.375705	1.36467e-13	8.47792e-11	down	no
50952	0	chr15	-	78559167	78572783	ENSMUST00000043214	7	3038	ENSMUSG00000033220	Rac2	GO:0000166(nucleotide binding);GO:0003924(GTPase activity);GO:0005525(GTP binding);GO:0005635(nuclear envelope);GO:0005737(cytoplasm);GO:0005829(cytosol);GO:0005856(cytoskeleton);GO:0005884(actin filament);GO:0005886(plasma membrane);GO:0005938(cell cortex);GO:0006935(chemotaxis);GO:0007015(actin filament organization);GO:0007186(G protein-coupled receptor signaling pathway);GO:0007264(small GTPa…	04010(MAPK signaling pathway);04014(Ras signaling pathway);04015(Rap1 signaling pathway);04024(cAMP signaling pathway);04062(Chemokine signaling pathway);04071(Sphingolipid signaling pathway);04310(Wnt signaling pathway);04360(Axon guidance);04370(VEGF signaling pathway);04510(Focal adhesion);04520(Adherens junction);04650(Natural killer cell mediated cytotoxicity);04662(B cell receptor signaling…	K07860	NA	Rac family small GTPase 2 [Source:MGI Symbol;Acc:MGI:97846]	protein_coding	R_MMU_114604(GPVI_mediated_activation_cascade);R_MMU_9012999(RHO_GTPase_cycle);R_MMU_6811558(PI5P,_PP2A_and_IER3_Regulate_PI3K/AKT_Signaling);R_MMU_9013404(RAC2_GTPase_cycle);R_MMU_109582(Hemostasis);R_MMU_1222556(ROS_and_RNS_production_in_phagocytes);R_MMU_3858494(Beta_catenin_independent_WNT_signaling);R_MMU_1257604(PIP3_activates_AKT_signaling);R_MMU_76002(Platelet_activation,_signaling_and_ag…	1.45391	1.28974	1.21186	3.41569	3.06845	3.90106	0.38088	-1.39259	1.36733e-13	8.47792e-11	down	yes
9912	0	chr1	+	65095227	65095436	ENSMUST00000185915	1	210	ENSMUSG00000100774	Gm7329	NA	NA	NA	NA	predicted gene 7329 [Source:MGI Symbol;Acc:MGI:3646271]	processed_pseudogene	NA	104.991	108.173	99.133	154.707	152.428	140.65	0.697427	-0.519886	1.89681e-13	1.16769e-10	down	no
55746	0	chr16	-	35832874	35871544	ENSMUST00000042665	17	7417	ENSMUSG00000034422	Parp14	GO:0002376(immune system process);GO:0003714(transcription corepressor activity);GO:0003950(NAD+ ADP-ribosyltransferase activity);GO:0005515(protein binding);GO:0005634(nucleus);GO:0005737(cytoplasm);GO:0005829(cytosol);GO:0005886(plasma membrane);GO:0006471(protein ADP-ribosylation);GO:0010629(negative regulation of gene expression);GO:0016740(transferase activity);GO:0016757(transferase activit…	NA	K15261	EC:2.4.2.30	poly (ADP-ribose) polymerase family, member 14 [Source:MGI Symbol;Acc:MGI:1919489]	protein_coding	R_MMU_197264(Nicotinamide_salvaging);R_MMU_196854(Metabolism_of_vitamins_and_cofactors);R_MMU_1430728(Metabolism);R_MMU_196849(Metabolism_of_water_soluble_vitamins_and_cofactors);R_MMU_196807(Nicotinate_metabolism)	21.2176	24.4028	31.7635	11.2594	8.93115	10.6987	2.5052	1.32493	1.93172e-13	1.18074e-10	up	yes
91026	0	chr4	+	6365677	6395655	ENSMUST00000103008	9	2086	ENSMUSG00000028249	Sdcbp	GO:0002091(negative regulation of receptor internalization);GO:0005109(frizzled binding);GO:0005137(interleukin-5 receptor binding);GO:0005515(protein binding);GO:0005546(phosphatidylinositol-4,5-bisphosphate binding);GO:0005576(extracellular region);GO:0005634(nucleus);GO:0005654(nucleoplasm);GO:0005737(cytoplasm);GO:0005783(endoplasmic reticulum);GO:0005789(endoplasmic reticulum membrane);GO:00…	NA	K17254	NA	syndecan binding protein [Source:MGI Symbol;Acc:MGI:1337026]	protein_coding	R_MMU_5675482(Regulation_of_necroptotic_cell_death);R_MMU_373760(L1CAM_interactions);R_MMU_5218859(Regulated_Necrosis);R_MMU_5357801(Programmed_Cell_Death);R_MMU_168256(Immune_System);R_MMU_422475(Axon_guidance);R_MMU_5213460(RIPK1_mediated_regulated_necrosis);R_MMU_447043(Neurofascin_interactions);R_MMU_6798695(Neutrophil_degranulation);R_MMU_168249(Innate_Immune_System);R_MMU_2682334(EPH_Ephrin…	35.7973	52.8022	61.3851	15.9821	17.5906	18.7698	2.86544	1.51876	2.31915e-13	1.40757e-10	up	yes
124227	0	chr7	-	104471844	104507825	ENSMUST00000033211	8	1904	ENSMUSG00000057596	Trim30d	GO:0000209(protein polyubiquitination);GO:0004842(ubiquitin-protein transferase activity);GO:0005515(protein binding);GO:0005634(nucleus);GO:0005654(nucleoplasm);GO:0005737(cytoplasm);GO:0005829(cytosol);GO:0006914(autophagy);GO:0008270(zinc ion binding);GO:0010468(regulation of gene expression);GO:0010508(positive regulation of autophagy);GO:0016567(protein ubiquitination);GO:0019901(protein kin…	05170(Human immunodeficiency virus 1 infection)	K10648	EC:2.3.2.27	tripartite motif-containing 30D [Source:MGI Symbol;Acc:MGI:3035181]	protein_coding	NA	9.75517	8.80832	9.43152	3.24247	2.73843	4.01645	2.80024	1.48555	2.5879e-13	1.55971e-10	up	yes
124512	0	chr7	-	106076751	106084046	ENSMUST00000183386	1	7296	ENSMUSG00000095649	Gm8979	NA	NA	NA	NA	predicted gene 8979 [Source:MGI Symbol;Acc:MGI:3703149]	unprocessed_pseudogene	NA	1.56611	1.52911	2.25286	0.623162	0.569291	0.552014	3.06574	1.61623	3.77661e-13	2.26033e-10	up	yes
134601	0	chr9	+	7347374	7360461	ENSMUST00000005950	10	3607	ENSMUSG00000049723	Mmp12	GO:0000122(negative regulation of transcription by RNA polymerase II);GO:0001046(core promoter sequence-specific DNA binding);GO:0004222(metalloendopeptidase activity);GO:0005509(calcium ion binding);GO:0005518(collagen binding);GO:0005576(extracellular region);GO:0005615(extracellular space);GO:0005634(nucleus);GO:0005737(cytoplasm);GO:0006508(proteolysis);GO:0006606(protein import into nucleus)…	NA	K01413	EC:3.4.24.65	matrix metallopeptidase 12 [Source:MGI Symbol;Acc:MGI:97005]	protein_coding	R_MMU_1442490(Collagen_degradation);R_MMU_1474244(Extracellular_matrix_organization);R_MMU_1474228(Degradation_of_the_extracellular_matrix)	6.70627	5.07707	4.05117	16.4939	13.6041	18.0628	0.328784	-1.60479	4.62514e-13	2.74909e-10	down	yes
142221	0	chr9	+	121297512	121474916	ENSMUST00000210798	18	5363	ENSMUSG00000032536	Trak1	GO:0005102(signaling receptor binding);GO:0005634(nucleus);GO:0005737(cytoplasm);GO:0005739(mitochondrion);GO:0005768(endosome);GO:0005769(early endosome);GO:0005938(cell cortex);GO:0006605(protein targeting);GO:0008089(anterograde axonal transport);GO:0008104(protein localization);GO:0008333(endosome to lysosome transport);GO:0016020(membrane);GO:0017022(myosin binding);GO:0019896(axonal transpo…	NA	K15369	NA	trafficking protein, kinesin binding 1 [Source:MGI Symbol;Acc:MGI:1914345]	protein_coding	R_MMU_9013419(RHOT2_GTPase_cycle);R_MMU_9013425(RHOT1_GTPase_cycle);R_MMU_9716542(Signaling_by_Rho_GTPases,_Miro_GTPases_and_RHOBTB3);R_MMU_162582(Signal_Transduction);R_MMU_9715370(Miro_GTPase_Cycle)	0.004295	0.010541	0.015812	1.53349	0.125557	3.74736	0.00566883	-7.46273	4.65745e-13	2.74933e-10	down	yes
29141	0	chr11	-	101162679	101170955	ENSMUST00000129895	13	2635	ENSMUSG00000035172	Plekhh3	GO:0003674(molecular_function);GO:0005856(cytoskeleton);GO:0007165(signal transduction);GO:0008150(biological_process)	NA	NA	NA	pleckstrin homology domain containing, family H (with MyTH4 domain) member 3 [Source:MGI Symbol;Acc:MGI:2384950]	nonsense_mediated_decay	NA	0	0	0	0.79457	0.645893	0.340876	0.000168413	-12.5357	5.54552e-13	3.2513e-10	down	yes
57619	0	chr16	+	93832267	93870702	ENSMUST00000232425	14	2114	ENSMUSG00000039456	Morc3	GO:0003674(molecular_function);GO:0003723(RNA binding);GO:0005634(nucleus);GO:0005654(nucleoplasm);GO:0006468(protein phosphorylation);GO:0007569(cell aging);GO:0008270(zinc ion binding);GO:0009791(post-embryonic development);GO:0016363(nuclear matrix);GO:0016605(PML body);GO:0018105(peptidyl-serine phosphorylation);GO:0046872(metal ion binding);GO:0048147(negative regulation of fibroblast prolif…	NA	NA	NA	microrchidia 3 [Source:MGI Symbol;Acc:MGI:2136841]	retained_intron	NA	0.654141	0.858206	0.926406	0.028559	0	0	85.3935	6.41605	6.47956e-13	3.76471e-10	up	yes
55752	0	chr16	-	35926511	35939151	ENSMUST00000081933	5	5309	ENSMUSG00000049502	Dtx3l	GO:0002230(positive regulation of defense response to virus by host);GO:0002376(immune system process);GO:0004842(ubiquitin-protein transferase activity);GO:0004857(enzyme inhibitor activity);GO:0005634(nucleus);GO:0005654(nucleoplasm);GO:0005737(cytoplasm);GO:0005764(lysosome);GO:0005765(lysosomal membrane);GO:0005768(endosome);GO:0005769(early endosome);GO:0005829(cytosol);GO:0006281(DNA repair…	04330(Notch signaling pathway)	K06058	EC:2.3.2.27	deltex 3-like, E3 ubiquitin ligase [Source:MGI Symbol;Acc:MGI:2656973]	protein_coding	R_MMU_168256(Immune_System);R_MMU_983168(Antigen_processing:_Ubiquitination_&_Proteasome_degradation);R_MMU_1280218(Adaptive_Immune_System);R_MMU_983169(Class_I_MHC_mediated_antigen_processing_&_presentation)	14.6076	15.0557	17.6241	8.28205	6.9217	8.41754	2.0019	1.00137	6.50857e-13	3.76471e-10	up	yes
67296	0	chr18	+	60376047	60392634	ENSMUST00000066912	2	2927	ENSMUSG00000054072	Iigp1	GO:0000166(nucleotide binding);GO:0002376(immune system process);GO:0003924(GTPase activity);GO:0005515(protein binding);GO:0005525(GTP binding);GO:0005634(nucleus);GO:0005737(cytoplasm);GO:0005783(endoplasmic reticulum);GO:0005789(endoplasmic reticulum membrane);GO:0005794(Golgi apparatus);GO:0006952(defense response);GO:0009617(response to bacterium);GO:0010506(regulation of autophagy);GO:00160…	NA	NA	NA	interferon inducible GTPase 1 [Source:MGI Symbol;Acc:MGI:1926259]	protein_coding	NA	98.1669	118.916	198.271	42.5668	33.1624	39.7084	3.59808	1.84723	7.44221e-13	4.27605e-10	up	yes
108912	0	chr6	+	38381525	38427647	ENSMUST00000159145	18	4241	ENSMUSG00000056832	Ttc26	GO:0005515(protein binding);GO:0005813(centrosome);GO:0005929(cilium);GO:0007224(smoothened signaling pathway);GO:0007286(spermatid development);GO:0008594(photoreceptor cell morphogenesis);GO:0015031(protein transport);GO:0030992(intraciliary transport particle B);GO:0035082(axoneme assembly);GO:0035720(intraciliary anterograde transport);GO:0035735(intraciliary transport involved in cilium asse…	NA	K19685	NA	tetratricopeptide repeat domain 26 [Source:MGI Symbol;Acc:MGI:2444853]	nonsense_mediated_decay	R_MMU_5617833(Cilium_Assembly);R_MMU_1852241(Organelle_biogenesis_and_maintenance);R_MMU_5620924(Intraflagellar_transport)	0.309871	0.274005	0.242591	0	0	0	2754.89	11.4278	8.59252e-13	4.90428e-10	up	yes
47379	0	chr14	+	75845302	75848525	ENSMUST00000142061	5	996	ENSMUSG00000060126	Tpt1	GO:0000922(spindle pole);GO:0005509(calcium ion binding);GO:0005515(protein binding);GO:0005615(extracellular space);GO:0005634(nucleus);GO:0005654(nucleoplasm);GO:0005737(cytoplasm);GO:0005771(multivesicular body);GO:0005829(cytosol);GO:0005881(cytoplasmic microtubule);GO:0007283(spermatogenesis);GO:0008134(transcription factor binding);GO:0019827(stem cell population maintenance);GO:1902230(neg…	NA	NA	NA	tumor protein, translationally-controlled 1 [Source:MGI Symbol;Acc:MGI:104890]	protein_coding	NA	0	0	0	144.618	0	0	2.07443e-06	-18.8789	9.01462e-13	5.11135e-10	down	yes
97389	0	chr4	-	143267431	143299564	ENSMUST00000030317	6	1817	ENSMUSG00000028583	Pdpn	GO:0000902(cell morphogenesis);GO:0001726(ruffle);GO:0001946(lymphangiogenesis);GO:0003333(amino acid transmembrane transport);GO:0005102(signaling receptor binding);GO:0005515(protein binding);GO:0005829(cytosol);GO:0005886(plasma membrane);GO:0006693(prostaglandin metabolic process);GO:0006833(water transport);GO:0007155(cell adhesion);GO:0007165(signal transduction);GO:0007266(Rho protein sign…	NA	K16778	NA	podoplanin [Source:MGI Symbol;Acc:MGI:103098]	protein_coding	R_MMU_114604(GPVI_mediated_activation_cascade);R_MMU_109582(Hemostasis);R_MMU_76002(Platelet_activation,_signaling_and_aggregation)	39.0012	33.172	42.7458	14.6409	16.0476	18.9025	2.31734	1.21247	9.11419e-13	5.13403e-10	up	yes
136664	0	chr9	-	44066327	44113500	ENSMUST00000162126	2	2964	ENSMUSG00000111409	Gm49380	GO:0005783(endoplasmic reticulum);GO:0005789(endoplasmic reticulum membrane);GO:0007032(endosome organization);GO:0016020(membrane);GO:0016021(integral component of membrane);GO:0016567(protein ubiquitination);GO:0016740(transferase activity);GO:0032479(regulation of type I interferon production);GO:0046872(metal ion binding);GO:0050687(negative regulation of defense response to virus);GO:0061630…	NA	NA	NA	predicted gene, 49380 [Source:MGI Symbol;Acc:MGI:6121601]	nonsense_mediated_decay	NA	0.245749	1.38013	1.65493	0	0	0	10936.1	13.4168	9.40465e-13	5.26324e-10	up	yes
23928	0	chr11	-	34226815	34783892	ENSMUST00000093193	52	6409	ENSMUSG00000020143	Dock2	GO:0001766(membrane raft polarization);GO:0001768(establishment of T cell polarity);GO:0001771(immunological synapse formation);GO:0002277(myeloid dendritic cell activation involved in immune response);GO:0005085(guanyl-nucleotide exchange factor activity);GO:0005096(GTPase activator activity);GO:0005515(protein binding);GO:0005737(cytoplasm);GO:0005856(cytoskeleton);GO:0006935(chemotaxis);GO:000…	04062(Chemokine signaling pathway);04666(Fc gamma R-mediated phagocytosis)	K12367	NA	dedicator of cyto-kinesis 2 [Source:MGI Symbol;Acc:MGI:2149010]	protein_coding	R_MMU_8980692(RHOA_GTPase_cycle);R_MMU_9012999(RHO_GTPase_cycle);R_MMU_9013404(RAC2_GTPase_cycle);R_MMU_109582(Hemostasis);R_MMU_983231(Factors_involved_in_megakaryocyte_development_and_platelet_production);R_MMU_168256(Immune_System);R_MMU_9716542(Signaling_by_Rho_GTPases,_Miro_GTPases_and_RHOBTB3);R_MMU_194315(Signaling_by_Rho_GTPases);R_MMU_6798695(Neutrophil_degranulation);R_MMU_168249(Innate…	0.665337	0.567965	0.479962	1.66079	1.38835	1.68502	0.361894	-1.46636	9.55581e-13	5.31334e-10	down	yes
71643	0	chr19	+	38055037	38074423	ENSMUST00000236044	10	2442	ENSMUSG00000024989	Cep55	GO:0000281(mitotic cytokinesis);GO:0005515(protein binding);GO:0005737(cytoplasm);GO:0005813(centrosome);GO:0005814(centriole);GO:0005815(microtubule organizing center);GO:0005856(cytoskeleton);GO:0005886(plasma membrane);GO:0007049(cell cycle);GO:0014066(regulation of phosphatidylinositol 3-kinase signaling);GO:0030496(midbody);GO:0032154(cleavage furrow);GO:0034451(centriolar satellite);GO:0042…	NA	K16456	NA	centrosomal protein 55 [Source:MGI Symbol;Acc:MGI:1921357]	protein_coding	NA	0	0	0	1.6194	0.303935	1.61624	8.47559e-05	-13.5263	9.97921e-13	5.5132e-10	down	yes
114375	0	chr6	+	129349964	129365303	ENSMUST00000065289	6	2502	ENSMUSG00000053063	Clec12a	GO:0016020(membrane);GO:0016021(integral component of membrane)	NA	K17516	NA	C-type lectin domain family 12, member a [Source:MGI Symbol;Acc:MGI:3040968]	protein_coding	R_MMU_168256(Immune_System);R_MMU_6798695(Neutrophil_degranulation);R_MMU_168249(Innate_Immune_System)	1.26909	1.24556	0.968496	2.83094	2.79417	2.92018	0.407611	-1.29473	1.49621e-12	8.21343e-10	down	yes
131133	0	chr8	-	71534255	71537456	ENSMUST00000051672	5	792	ENSMUSG00000046718	Bst2	GO:0002376(immune system process);GO:0002737(negative regulation of plasmacytoid dendritic cell cytokine production);GO:0005737(cytoplasm);GO:0005768(endosome);GO:0005770(late endosome);GO:0005794(Golgi apparatus);GO:0005886(plasma membrane);GO:0008191(metalloendopeptidase inhibitor activity);GO:0009615(response to virus);GO:0009986(cell surface);GO:0010951(negative regulation of endopeptidase ac…	05168(Herpes simplex virus 1 infection);05170(Human immunodeficiency virus 1 infection)	K06731	NA	bone marrow stromal cell antigen 2 [Source:MGI Symbol;Acc:MGI:1916800]	protein_coding	R_MMU_168256(Immune_System);R_MMU_6798695(Neutrophil_degranulation);R_MMU_168249(Innate_Immune_System)	350.821	308.818	490.968	105.859	111.929	153.479	3.09914	1.63187	1.64483e-12	8.97215e-10	up	yes
35603	0	chr12	+	108635710	108686575	ENSMUST00000223109	13	1487	ENSMUSG00000021262	Evl	GO:0003779(actin binding);GO:0005515(protein binding);GO:0005522(profilin binding);GO:0005737(cytoplasm);GO:0005856(cytoskeleton);GO:0005925(focal adhesion);GO:0007411(axon guidance);GO:0008154(actin polymerization or depolymerization);GO:0010633(negative regulation of epithelial cell migration);GO:0017124(SH3 domain binding);GO:0030027(lamellipodium);GO:0030048(actin filament-based movement);GO:…	NA	NA	NA	Ena-vasodilator stimulated phosphoprotein [Source:MGI Symbol;Acc:MGI:1194884]	protein_coding	R_MMU_5663220(RHO_GTPases_Activate_Formins);R_MMU_9716542(Signaling_by_Rho_GTPases,_Miro_GTPases_and_RHOBTB3);R_MMU_376176(Signaling_by_ROBO_receptors);R_MMU_422475(Axon_guidance);R_MMU_194315(Signaling_by_Rho_GTPases);R_MMU_162582(Signal_Transduction);R_MMU_195258(RHO_GTPase_Effectors);R_MMU_9675108(Nervous_system_development);R_MMU_1266738(Developmental_Biology)	0.795176	1.0974	1.04318	3.25818	4.76525	5.77719	0.212726	-2.23293	1.7e-12	9.21475e-10	down	yes
13613	0	chr1	-	155275701	155417329	ENSMUST00000027741	15	7492	ENSMUSG00000026469	Xpr1	GO:0000822(inositol hexakisphosphate binding);GO:0001618(virus receptor activity);GO:0005737(cytoplasm);GO:0005794(Golgi apparatus);GO:0005886(plasma membrane);GO:0006817(phosphate ion transport);GO:0009615(response to virus);GO:0015114(phosphate ion transmembrane transporter activity);GO:0015562(efflux transmembrane transporter activity);GO:0016020(membrane);GO:0016021(integral component of memb…	NA	NA	NA	xenotropic and polytropic retrovirus receptor 1 [Source:MGI Symbol;Acc:MGI:97932]	protein_coding	NA	3.67073	3.78903	3.85373	5.28578	5.13612	5.03017	0.732167	-0.449756	1.73928e-12	9.36874e-10	down	no
31240	0	chr11	-	120805846	120824547	ENSMUST00000055655	43	10050	ENSMUSG00000025153	Fasn	GO:0003824(catalytic activity);GO:0004312(fatty acid synthase activity);GO:0004313([acyl-carrier-protein] S-acetyltransferase activity);GO:0004314([acyl-carrier-protein] S-malonyltransferase activity);GO:0004315(3-oxoacyl-[acyl-carrier-protein] synthase activity);GO:0004316(3-oxoacyl-[acyl-carrier-protein] reductase (NADPH) activity);GO:0004317(3-hydroxypalmitoyl-[acyl-carrier-protein] dehydratas…	00061(Fatty acid biosynthesis);04152(AMPK signaling pathway);04910(Insulin signaling pathway)	K00665	EC:2.3.1.85	fatty acid synthase [Source:MGI Symbol;Acc:MGI:95485]	protein_coding	R_MMU_163685(Integration_of_energy_metabolism);R_MMU_163765(ChREBP_activates_metabolic_gene_expression);R_MMU_196854(Metabolism_of_vitamins_and_cofactors);R_MMU_556833(Metabolism_of_lipids);R_MMU_1430728(Metabolism);R_MMU_8978868(Fatty_acid_metabolism);R_MMU_199220(Vitamin_B5_(pantothenate)_metabolism);R_MMU_196849(Metabolism_of_water_soluble_vitamins_and_cofactors);R_MMU_75105(Fatty_acyl_CoA_bio…	510.205	549.662	446.349	785.889	839.322	704.096	0.646637	-0.628973	1.90387e-12	1.01916e-09	down	no
124502	0	chr7	-	105824223	105831515	ENSMUST00000146911	1	7293	ENSMUSG00000086513	9130208D14Rik	NA	NA	NA	NA	RIKEN cDNA 9130208D14 gene [Source:MGI Symbol;Acc:MGI:1924950]	unprocessed_pseudogene	NA	1.66484	2.07096	2.88694	0.685789	0.690851	0.649065	3.26936	1.70901	2.01509e-12	1.07204e-09	up	yes
13466	0	chr1	+	152807890	152836990	ENSMUST00000027754	15	2596	ENSMUSG00000026480	Ncf2	GO:0001669(acrosomal vesicle);GO:0005515(protein binding);GO:0005730(nucleolus);GO:0005737(cytoplasm);GO:0005829(cytosol);GO:0006742(NADP catabolic process);GO:0006801(superoxide metabolic process);GO:0006909(phagocytosis);GO:0008022(protein C-terminus binding);GO:0009749(response to glucose);GO:0014070(response to organic cyclic compound);GO:0016020(membrane);GO:0016175(superoxide-generating NAD…	04145(Phagosome);04380(Osteoclast differentiation);04670(Leukocyte transendothelial migration);05140(Leishmaniasis);05418(Fluid shear stress and atherosclerosis)	K08010	NA	neutrophil cytosolic factor 2 [Source:MGI Symbol;Acc:MGI:97284]	protein_coding	R_MMU_9013423(RAC3_GTPase_cycle);R_MMU_9012999(RHO_GTPase_cycle);R_MMU_4420097(VEGFA_VEGFR2_Pathway);R_MMU_9013404(RAC2_GTPase_cycle);R_MMU_9711123(Cellular_response_to_chemical_stress);R_MMU_1222556(ROS_and_RNS_production_in_phagocytes);R_MMU_2262752(Cellular_responses_to_stress);R_MMU_1236975(Antigen_processing_Cross_presentation);R_MMU_8953897(Cellular_responses_to_external_stimuli);R_MMU_5668…	1.78913	2.06376	1.92821	4.32993	3.58685	3.76477	0.494892	-1.01481	2.42101e-12	1.28009e-09	down	yes
114396	0	chr6	-	129485244	129507165	ENSMUST00000032265	8	3572	ENSMUSG00000030162	Olr1	GO:0002376(immune system process);GO:0005041(low-density lipoprotein particle receptor activity);GO:0005576(extracellular region);GO:0005654(nucleoplasm);GO:0005886(plasma membrane);GO:0006897(endocytosis);GO:0006954(inflammatory response);GO:0007155(cell adhesion);GO:0007159(leukocyte cell-cell adhesion);GO:0008219(cell death);GO:0010629(negative regulation of gene expression);GO:0016020(membran…	03320(PPAR signaling pathway);04145(Phagosome)	K08763	NA	oxidized low density lipoprotein (lectin-like) receptor 1 [Source:MGI Symbol;Acc:MGI:1261434]	protein_coding	R_MMU_109582(Hemostasis);R_MMU_202733(Cell_surface_interactions_at_the_vascular_wall);R_MMU_168256(Immune_System);R_MMU_6798695(Neutrophil_degranulation);R_MMU_168249(Innate_Immune_System)	3.58739	4.78023	3.13193	11.7629	9.08864	8.72866	0.388758	-1.36306	2.45964e-12	1.29259e-09	down	yes
50772	0	chr15	+	77045276	77057106	ENSMUST00000149569	5	2314	ENSMUSG00000033576	Apol6	GO:0005575(cellular_component);GO:0005576(extracellular region);GO:0006869(lipid transport);GO:0008150(biological_process);GO:0008289(lipid binding);GO:0016020(membrane);GO:0016021(integral component of membrane);GO:0042157(lipoprotein metabolic process)	NA	K14480	NA	apolipoprotein L 6 [Source:MGI Symbol;Acc:MGI:1919189]	protein_coding	NA	55.0548	58.915	56.8575	41.8082	37.7225	40.4653	1.42361	0.509551	2.63975e-12	1.37883e-09	up	no
50216	0	chr15	+	74956555	74958826	ENSMUST00000188042	4	714	ENSMUSG00000022587	Ly6e	GO:0016020(membrane);GO:0016021(integral component of membrane)	NA	K06846	NA	lymphocyte antigen 6 complex, locus E [Source:MGI Symbol;Acc:MGI:106651]	protein_coding	R_MMU_597592(Post_translational_protein_modification);R_MMU_392499(Metabolism_of_proteins);R_MMU_163125(Post_translational_modification:_synthesis_of_GPI_anchored_proteins)	2.81563	2.78846	4.19456	0.627066	0.486169	0.53538	5.94357	2.57133	2.71701e-12	1.41063e-09	up	yes
20038	0	chr10	-	81528724	81545190	ENSMUST00000043604	7	3414	ENSMUSG00000034781	Gna11	GO:0000166(nucleotide binding);GO:0001501(skeletal system development);GO:0001508(action potential);GO:0001664(G protein-coupled receptor binding);GO:0003924(GTPase activity);GO:0005525(GTP binding);GO:0005737(cytoplasm);GO:0005829(cytosol);GO:0005834(heterotrimeric G-protein complex);GO:0005886(plasma membrane);GO:0007165(signal transduction);GO:0007186(G protein-coupled receptor signaling pathw…	04020(Calcium signaling pathway);04022(cGMP-PKG signaling pathway);04270(Vascular smooth muscle contraction);04540(Gap junction);04725(Cholinergic synapse);04730(Long-term depression);04911(Insulin secretion);04912(GnRH signaling pathway);04925(Aldosterone synthesis and secretion);04927(Cortisol synthesis and secretion);04928(Parathyroid hormone synthesis, secretion and action);04934(Cushing synd…	K04635	NA	guanine nucleotide binding protein, alpha 11 [Source:MGI Symbol;Acc:MGI:95766]	protein_coding	R_MMU_163685(Integration_of_energy_metabolism);R_MMU_112040(G_protein_mediated_events);R_MMU_456926(Thrombin_signalling_through_proteinase_activated_receptors_(PARs));R_MMU_109582(Hemostasis);R_MMU_1430728(Metabolism);R_MMU_392518(Signal_amplification);R_MMU_76002(Platelet_activation,_signaling_and_aggregation);R_MMU_391251(Protein_folding);R_MMU_392499(Metabolism_of_proteins);R_MMU_390466(Chaper…	13.651	13.5765	13.2481	19.7715	20.9928	22.5637	0.639142	-0.645792	2.93799e-12	1.51623e-09	down	no
22238	0	chr10	+	128270576	128292849	ENSMUST00000085708	24	4394	ENSMUSG00000040033	Stat2	GO:0001932(regulation of protein phosphorylation);GO:0003677(DNA binding);GO:0003700(DNA-binding transcription factor activity);GO:0005515(protein binding);GO:0005634(nucleus);GO:0005737(cytoplasm);GO:0005829(cytosol);GO:0005886(plasma membrane);GO:0006355(regulation of transcription, DNA-templated);GO:0007165(signal transduction);GO:0042802(identical protein binding);GO:0044389(ubiquitin-like pr…	04062(Chemokine signaling pathway);04217(Necroptosis);04380(Osteoclast differentiation);04621(NOD-like receptor signaling pathway);04625(C-type lectin receptor signaling pathway);04630(Jak-STAT signaling pathway);05160(Hepatitis C);05161(Hepatitis B);05162(Measles);05164(Influenza A);05165(Human papillomavirus infection);05167(Kaposi sarcoma-associated herpesvirus infection);05168(Herpes simplex …	K11221	NA	signal transducer and activator of transcription 2 [Source:MGI Symbol;Acc:MGI:103039]	protein_coding	R_MMU_449147(Signaling_by_Interleukins);R_MMU_912694(Regulation_of_IFNA_signaling);R_MMU_168256(Immune_System);R_MMU_8854691(Interleukin_20_family_signaling);R_MMU_1280215(Cytokine_Signaling_in_Immune_system);R_MMU_913531(Interferon_Signaling);R_MMU_909733(Interferon_alpha/beta_signaling)	43.8032	46.9275	54.5935	26.7502	19.7651	23.812	2.0664	1.04712	2.9656e-12	1.52137e-09	up	yes
81528	0	chr2	+	151494182	151511310	ENSMUST00000089140	10	1486	ENSMUSG00000027455	Nsfl1c	GO:0000045(autophagosome assembly);GO:0000132(establishment of mitotic spindle orientation);GO:0005515(protein binding);GO:0005543(phospholipid binding);GO:0005634(nucleus);GO:0005654(nucleoplasm);GO:0005694(chromosome);GO:0005737(cytoplasm);GO:0005794(Golgi apparatus);GO:0005795(Golgi stack);GO:0005815(microtubule organizing center);GO:0005829(cytosol);GO:0005856(cytoskeleton);GO:0005886(plasma …	04141(Protein processing in endoplasmic reticulum)	K14012	NA	NSFL1 (p97) cofactor (p47) [Source:MGI Symbol;Acc:MGI:3042273]	protein_coding	R_MMU_9012999(RHO_GTPase_cycle);R_MMU_9716542(Signaling_by_Rho_GTPases,_Miro_GTPases_and_RHOBTB3);R_MMU_194315(Signaling_by_Rho_GTPases);R_MMU_162582(Signal_Transduction);R_MMU_9013407(RHOH_GTPase_cycle)	2.11367	0.933876	1.7628	0.007028	0	0	684.455	9.41881	3.41757e-12	1.74286e-09	up	yes
50956	0	chr15	+	78597047	78622019	ENSMUST00000043069	13	2791	ENSMUSG00000018008	Cyth4	GO:0005085(guanyl-nucleotide exchange factor activity);GO:0005086(ARF guanyl-nucleotide exchange factor activity);GO:0005886(plasma membrane);GO:0008289(lipid binding);GO:0016020(membrane);GO:0032012(regulation of ARF protein signal transduction)	04072(Phospholipase D signaling pathway);04144(Endocytosis)	K18441	NA	cytohesin 4 [Source:MGI Symbol;Acc:MGI:2441702]	protein_coding	R_MMU_5653656(Vesicle_mediated_transport);R_MMU_6811438(Intra_Golgi_traffic);R_MMU_199991(Membrane_Trafficking);R_MMU_6811442(Intra_Golgi_and_retrograde_Golgi_to_ER_traffic)	2.24248	1.79053	1.49929	4.94416	4.59157	4.62446	0.390695	-1.35589	3.45654e-12	1.74814e-09	down	yes
65219	0	chr18	+	6765145	6794429	ENSMUST00000234810	7	6515	ENSMUSG00000073639	Rab18	GO:0000166(nucleotide binding);GO:0001654(eye development);GO:0003924(GTPase activity);GO:0005525(GTP binding);GO:0005794(Golgi apparatus);GO:0005811(lipid droplet);GO:0005886(plasma membrane);GO:0006886(intracellular protein transport);GO:0007275(multicellular organism development);GO:0007420(brain development);GO:0012505(endomembrane system);GO:0015031(protein transport);GO:0016020(membrane);GO…	NA	K07910	NA	RAB18, member RAS oncogene family [Source:MGI Symbol;Acc:MGI:102790]	protein_coding	R_MMU_5653656(Vesicle_mediated_transport);R_MMU_8873719(RAB_geranylgeranylation);R_MMU_6811436(COPI_independent_Golgi_to_ER_retrograde_traffic);R_MMU_597592(Post_translational_protein_modification);R_MMU_392499(Metabolism_of_proteins);R_MMU_168256(Immune_System);R_MMU_8856688(Golgi_to_ER_retrograde_transport);R_MMU_199991(Membrane_Trafficking);R_MMU_6798695(Neutrophil_degranulation);R_MMU_168249(…	14.6865	15.5131	14.9973	19.1721	19.7866	19.8549	0.768477	-0.379927	3.4685e-12	1.74814e-09	down	no
92010	0	chr4	+	42581840	42586871	ENSMUST00000238374	4	3365	ENSMUSG00000095258	Gm10593	NA	NA	NA	NA	predicted gene 10593 [Source:MGI Symbol;Acc:MGI:3710526]	transcribed_unprocessed_pseudogene	NA	0	0	0	0.494402	0.257342	0.301591	0.00028481	-11.7777	3.62694e-12	1.81737e-09	down	yes
122548	0	chr7	+	81859001	81884071	ENSMUST00000041890	10	2226	ENSMUSG00000038623	Tm6sf1	GO:0005764(lysosome);GO:0005765(lysosomal membrane);GO:0016020(membrane);GO:0016021(integral component of membrane)	NA	NA	NA	transmembrane 6 superfamily member 1 [Source:MGI Symbol;Acc:MGI:1933209]	protein_coding	NA	1.35226	1.38839	1.31593	3.2439	3.03168	2.57129	0.458533	-1.1249	4.10827e-12	2.04665e-09	down	yes
22350	0	chr10	-	128624534	128626424	ENSMUST00000219591	3	596	ENSMUSG00000025362	Rps26	GO:0002181(cytoplasmic translation);GO:0003729(mRNA binding);GO:0003735(structural constituent of ribosome);GO:0005737(cytoplasm);GO:0005783(endoplasmic reticulum);GO:0005791(rough endoplasmic reticulum);GO:0005829(cytosol);GO:0005840(ribosome);GO:0006412(translation);GO:0022627(cytosolic small ribosomal subunit);GO:0033119(negative regulation of RNA splicing);GO:0042788(polysomal ribosome);GO:00…	03010(Ribosome)	K02976	NA	ribosomal protein S26 [Source:MGI Symbol;Acc:MGI:1351628]	retained_intron	R_MMU_975957(Nonsense_Mediated_Decay_(NMD)_enhanced_by_the_Exon_Junction_Complex_(EJC));R_MMU_1799339(SRP_dependent_cotranslational_protein_targeting_to_membrane);R_MMU_975956(Nonsense_Mediated_Decay_(NMD)_independent_of_the_Exon_Junction_Complex_(EJC));R_MMU_72766(Translation);R_MMU_72689(Formation_of_a_pool_of_free_40S_subunits);R_MMU_72737(Cap_dependent_Translation_Initiation);R_MMU_392499(Met…	19.5505	28.7637	17.5897	53.2149	75.3373	77.129	0.320417	-1.64198	4.17208e-12	2.0665e-09	down	yes
82252	0	chr2	-	157097533	157135265	ENSMUST00000057725	16	3926	ENSMUSG00000027639	Samhd1	GO:0000166(nucleotide binding);GO:0000724(double-strand break repair via homologous recombination);GO:0002376(immune system process);GO:0003676(nucleic acid binding);GO:0003697(single-stranded DNA binding);GO:0003723(RNA binding);GO:0003824(catalytic activity);GO:0004540(ribonuclease activity);GO:0005515(protein binding);GO:0005525(GTP binding);GO:0005634(nucleus);GO:0005654(nucleoplasm);GO:00056…	05170(Human immunodeficiency virus 1 infection)	K22544	EC:3.1.5.-	SAM domain and HD domain, 1 [Source:MGI Symbol;Acc:MGI:1927468]	protein_coding	R_MMU_1430728(Metabolism);R_MMU_8956319(Nucleobase_catabolism);R_MMU_15869(Metabolism_of_nucleotides)	18.808	20.3049	22.2548	11.4413	11.0651	12.6004	1.74803	0.805727	4.50895e-12	2.22059e-09	up	no
48988	0	chr15	+	33090308	33304620	ENSMUST00000226896	4	3124	ENSMUSG00000039007	Cpq	GO:0004180(carboxypeptidase activity);GO:0005576(extracellular region);GO:0005615(extracellular space);GO:0005737(cytoplasm);GO:0005764(lysosome);GO:0005783(endoplasmic reticulum);GO:0005794(Golgi apparatus);GO:0006508(proteolysis);GO:0006590(thyroid hormone generation);GO:0008233(peptidase activity);GO:0008237(metallopeptidase activity);GO:0016787(hydrolase activity);GO:0042246(tissue regenerati…	NA	K01302	EC:3.4.17.-	carboxypeptidase Q [Source:MGI Symbol;Acc:MGI:1889205]	retained_intron	NA	0.655834	0.281785	0.365016	0	0	0	4342.12	12.0842	4.80694e-12	2.3539e-09	up	yes
5068	0	X	-	167207095	167209149	ENSMUST00000112176	3	698	ENSMUSG00000049775	Tmsb4x	GO:0003779(actin binding);GO:0003785(actin monomer binding);GO:0005515(protein binding);GO:0005634(nucleus);GO:0005737(cytoplasm);GO:0005829(cytosol);GO:0005856(cytoskeleton);GO:0007015(actin filament organization);GO:0014911(positive regulation of smooth muscle cell migration);GO:0030334(regulation of cell migration);GO:0042989(sequestering of actin monomers);GO:0045893(positive regulation of tr…	04810(Regulation of actin cytoskeleton)	K05764	NA	thymosin, beta 4, X chromosome [Source:MGI Symbol;Acc:MGI:99510]	protein_coding	R_MMU_109582(Hemostasis);R_MMU_76002(Platelet_activation,_signaling_and_aggregation);R_MMU_114608(Platelet_degranulation);R_MMU_76005(Response_to_elevated_platelet_cytosolic_Ca2+)	3.10391	5.38449	4.2611	0.627974	0.894068	0.509837	6.27474	2.64955	5.26561e-12	2.56393e-09	up	yes
76263	0	chr2	-	51924451	51934644	ENSMUST00000165313	5	1975	ENSMUSG00000036249	Rbm43	GO:0003674(molecular_function);GO:0003676(nucleic acid binding);GO:0003723(RNA binding);GO:0005575(cellular_component);GO:0008150(biological_process)	NA	NA	NA	RNA binding motif protein 43 [Source:MGI Symbol;Acc:MGI:1918934]	protein_coding	NA	0.672516	0.960679	0.379677	0	0	0	6709.57	12.712	5.39376e-12	2.60875e-09	up	yes
54441	0	chr16	-	17840355	17891660	ENSMUST00000117945	10	4003	ENSMUSG00000003166	Dgcr2	GO:0005515(protein binding);GO:0007155(cell adhesion);GO:0016020(membrane);GO:0016021(integral component of membrane)	NA	NA	NA	DiGeorge syndrome critical region gene 2 [Source:MGI Symbol;Acc:MGI:892866]	protein_coding	NA	7.96108	8.16133	8.37826	2.22332	3.51715	3.38587	2.68461	1.42471	5.41818e-12	2.60875e-09	up	yes
66975	0	chr18	+	46850038	46907242	ENSMUST00000025358	20	5016	ENSMUSG00000024481	Lvrn	GO:0004177(aminopeptidase activity);GO:0006508(proteolysis);GO:0008233(peptidase activity);GO:0008237(metallopeptidase activity);GO:0008270(zinc ion binding);GO:0016787(hydrolase activity);GO:0046872(metal ion binding)	NA	K13724	EC:3.4.11.-	laeverin [Source:MGI Symbol;Acc:MGI:1921824]	protein_coding	NA	2.18883	1.86811	1.73876	0.56761	0.723655	0.771375	2.80984	1.49049	5.86184e-12	2.80668e-09	up	yes
23871	0	chr11	+	32642866	32746789	ENSMUST00000093205	13	3938	ENSMUSG00000020271	Fbxw11	GO:0000132(establishment of mitotic spindle orientation);GO:0000209(protein polyubiquitination);GO:0000776(kinetochore);GO:0004842(ubiquitin-protein transferase activity);GO:0005515(protein binding);GO:0005634(nucleus);GO:0005635(nuclear envelope);GO:0005737(cytoplasm);GO:0005813(centrosome);GO:0005829(cytosol);GO:0005875(microtubule associated complex);GO:0005881(cytoplasmic microtubule);GO:0006…	04114(Oocyte meiosis);04120(Ubiquitin mediated proteolysis);04218(Cellular senescence);04310(Wnt signaling pathway);04340(Hedgehog signaling pathway);04390(Hippo signaling pathway);04710(Circadian rhythm);05170(Human immunodeficiency virus 1 infection)	K03362	NA	F-box and WD-40 domain protein 11 [Source:MGI Symbol;Acc:MGI:2144023]	protein_coding	R_MMU_5668541(TNFR2_non_canonical_NF_kB_pathway);R_MMU_5607761(Dectin_1_mediated_noncanonical_NF_kB_signaling);R_MMU_446652(Interleukin_1_family_signaling);R_MMU_448424(Interleukin_17_signaling);R_MMU_8951664(Neddylation);R_MMU_5684264(MAP3K8_(TPL2)_dependent_MAPK1/3_activation);R_MMU_166058(MyD88:MAL(TIRAP)_cascade_initiated_on_plasma_membrane);R_MMU_983705(Signaling_by_the_B_Cell_Receptor_(BCR)…	0.114161	1.07524	2.86675	0	0	0	13520.5	13.7229	5.91097e-12	2.81457e-09	up	yes
52990	0	chr15	+	101128551	101143639	ENSMUST00000120028	12	1932	ENSMUSG00000000530	Acvrl1	GO:0000166(nucleotide binding);GO:0001525(angiogenesis);GO:0001666(response to hypoxia);GO:0001701(in utero embryonic development);GO:0001937(negative regulation of endothelial cell proliferation);GO:0001938(positive regulation of endothelial cell proliferation);GO:0001946(lymphangiogenesis);GO:0001974(blood vessel remodeling);GO:0003203(endocardial cushion morphogenesis);GO:0004672(protein kinas…	04060(Cytokine-cytokine receptor interaction)	K13594	EC:2.7.11.30	activin A receptor, type II-like 1 [Source:MGI Symbol;Acc:MGI:1338946]	protein_coding	R_MMU_201451(Signaling_by_BMP);R_MMU_9006936(Signaling_by_TGFB_family_members);R_MMU_162582(Signal_Transduction)	0.512518	0.58402	1.55567	0	0	0	8840.69	13.1099	6.47719e-12	3.06724e-09	up	yes
81529	0	chr2	+	151494189	151507105	ENSMUST00000153333	8	1631	ENSMUSG00000027455	Nsfl1c	GO:0000045(autophagosome assembly);GO:0000132(establishment of mitotic spindle orientation);GO:0005515(protein binding);GO:0005543(phospholipid binding);GO:0005634(nucleus);GO:0005654(nucleoplasm);GO:0005694(chromosome);GO:0005737(cytoplasm);GO:0005794(Golgi apparatus);GO:0005795(Golgi stack);GO:0005815(microtubule organizing center);GO:0005829(cytosol);GO:0005856(cytoskeleton);GO:0005886(plasma …	04141(Protein processing in endoplasmic reticulum)	K14012	NA	NSFL1 (p97) cofactor (p47) [Source:MGI Symbol;Acc:MGI:3042273]	retained_intron	R_MMU_9012999(RHO_GTPase_cycle);R_MMU_9716542(Signaling_by_Rho_GTPases,_Miro_GTPases_and_RHOBTB3);R_MMU_194315(Signaling_by_Rho_GTPases);R_MMU_162582(Signal_Transduction);R_MMU_9013407(RHOH_GTPase_cycle)	0	0	0	1.2374	0.826425	0.832428	0.000103582	-13.2369	7.52508e-12	3.54398e-09	down	yes
66969	0	chr18	+	46741936	46790303	ENSMUST00000224622	7	978	ENSMUSG00000024480	Ap3s1	GO:0005794(Golgi apparatus);GO:0005802(trans-Golgi network);GO:0006886(intracellular protein transport);GO:0008089(anterograde axonal transport);GO:0015031(protein transport);GO:0016020(membrane);GO:0016192(vesicle-mediated transport);GO:0030117(membrane coat);GO:0030123(AP-3 adaptor complex);GO:0030659(cytoplasmic vesicle membrane);GO:0031410(cytoplasmic vesicle);GO:0043231(intracellular membran…	04142(Lysosome)	K12399	NA	adaptor-related protein complex 3, sigma 1 subunit [Source:MGI Symbol;Acc:MGI:1337062]	protein_coding	R_MMU_5653656(Vesicle_mediated_transport);R_MMU_432722(Golgi_Associated_Vesicle_Biogenesis);R_MMU_199991(Membrane_Trafficking);R_MMU_199992(trans_Golgi_Network_Vesicle_Budding)	0	0	0	51.3153	0	0	5.84621e-06	-17.3841	9.1713e-12	4.29581e-09	down	yes
23725	0	chr11	+	29692947	29742916	ENSMUST00000102842	8	2257	ENSMUSG00000020458	Rtn4	GO:0001825(blastocyst formation);GO:0005515(protein binding);GO:0005635(nuclear envelope);GO:0005737(cytoplasm);GO:0005783(endoplasmic reticulum);GO:0005789(endoplasmic reticulum membrane);GO:0005886(plasma membrane);GO:0007029(endoplasmic reticulum organization);GO:0007399(nervous system development);GO:0007413(axonal fasciculation);GO:0010634(positive regulation of epithelial cell migration);GO…	05010(Alzheimer disease)	K20720	NA	reticulon 4 [Source:MGI Symbol;Acc:MGI:1915835]	protein_coding	R_MMU_73887(Death_Receptor_Signalling);R_MMU_193697(p75NTR_regulates_axonogenesis);R_MMU_193704(p75_NTR_receptor_mediated_signalling);R_MMU_162582(Signal_Transduction);R_MMU_193634(Axonal_growth_inhibition_(RHOA_activation))	5.18653	8.52965	8.05482	23.2418	27.5526	49.6697	0.216704	-2.2062	9.728e-12	4.53193e-09	down	yes
59830	0	chr17	-	25926452	25941894	ENSMUST00000208071	10	2926	ENSMUSG00000025728	Pigq	GO:0000506(glycosylphosphatidylinositol-N-acetylglucosaminyltransferase (GPI-GnT) complex);GO:0006506(GPI anchor biosynthetic process);GO:0016020(membrane);GO:0016021(integral component of membrane);GO:0016740(transferase activity);GO:0016757(transferase activity, transferring glycosyl groups);GO:0017176(phosphatidylinositol N-acetylglucosaminyltransferase activity)	00563(Glycosylphosphatidylinositol (GPI)-anchor biosynthesis)	K03860	NA	phosphatidylinositol glycan anchor biosynthesis, class Q [Source:MGI Symbol;Acc:MGI:1333114]	protein_coding	R_MMU_597592(Post_translational_protein_modification);R_MMU_162710(Synthesis_of_glycosylphosphatidylinositol_(GPI));R_MMU_392499(Metabolism_of_proteins);R_MMU_163125(Post_translational_modification:_synthesis_of_GPI_anchored_proteins)	0	0	0	0	0	15.1515	1.98001e-05	-15.6241	1.10802e-11	5.1341e-09	down	yes
111688	0	chr6	+	86438727	86470388	ENSMUST00000113698	10	2922	ENSMUSG00000046679	C87436	GO:0003674(molecular_function);GO:0005634(nucleus);GO:0005654(nucleoplasm);GO:0008150(biological_process);GO:0031965(nuclear membrane)	NA	NA	NA	expressed sequence C87436 [Source:MGI Symbol;Acc:MGI:2141787]	protein_coding	NA	0.311884	0.394987	0.273219	1.07886	1.69083	1.64668	0.221922	-2.17188	1.19245e-11	5.49578e-09	down	yes
31638	0	chr12	+	8674681	8752581	ENSMUST00000168361	21	6226	ENSMUSG00000020594	Pum2	GO:0003723(RNA binding);GO:0003729(mRNA binding);GO:0003730(mRNA 3'-UTR binding);GO:0005515(protein binding);GO:0005737(cytoplasm);GO:0005829(cytosol);GO:0006417(regulation of translation);GO:0010494(cytoplasmic stress granule);GO:0010608(posttranscriptional regulation of gene expression);GO:0031965(nuclear membrane);GO:0034063(stress granule assembly);GO:0035196(production of miRNAs involved in …	NA	K17943	NA	pumilio RNA-binding family member 2 [Source:MGI Symbol;Acc:MGI:1931751]	protein_coding	NA	0	0	0	6.8909	0	0.004134	4.35096e-05	-14.4883	1.34935e-11	6.18584e-09	down	yes
135568	0	chr9	+	25252451	25308566	ENSMUST00000165594	14	2516	ENSMUSG00000001833	Septin7	GO:0000166(nucleotide binding);GO:0000775(chromosome, centromeric region);GO:0000776(kinetochore);GO:0000777(condensed chromosome kinetochore);GO:0005525(GTP binding);GO:0005694(chromosome);GO:0005819(spindle);GO:0005856(cytoskeleton);GO:0005929(cilium);GO:0007283(spermatogenesis);GO:0030496(midbody);GO:0031105(septin complex);GO:0031514(motile cilium);GO:0032154(cleavage furrow)	NA	K16944	NA	septin 7 [Source:MGI Symbol;Acc:MGI:1335094]	protein_coding	R_MMU_5683057(MAPK_family_signaling_cascades);R_MMU_162582(Signal_Transduction);R_MMU_5687128(MAPK6/MAPK4_signaling)	0	0	29.9779	0	0	0	99926.3	16.6086	1.42783e-11	6.51097e-09	up	yes
4853	0	X	-	160623094	160719972	ENSMUST00000071204	16	2483	ENSMUSG00000062168	Ppef1	GO:0004721(phosphoprotein phosphatase activity);GO:0004722(protein serine/threonine phosphatase activity);GO:0005506(iron ion binding);GO:0005509(calcium ion binding);GO:0005515(protein binding);GO:0005634(nucleus);GO:0005829(cytosol);GO:0006470(protein dephosphorylation);GO:0016787(hydrolase activity);GO:0030145(manganese ion binding);GO:0046872(metal ion binding);GO:0050906(detection of stimulu…	NA	K13807	EC:3.1.3.16	protein phosphatase with EF hand calcium-binding domain 1 [Source:MGI Symbol;Acc:MGI:1097157]	protein_coding	R_MMU_2514856(The_phototransduction_cascade);R_MMU_9709957(Sensory_Perception);R_MMU_2187338(Visual_phototransduction);R_MMU_2514859(Inactivation,_recovery_and_regulation_of_the_phototransduction_cascade)	1.19241	1.36688	1.74124	0.403316	0.273951	0.287933	4.45559	2.15562	1.47186e-11	6.67611e-09	up	yes
82352	0	chr2	+	158306493	158332852	ENSMUST00000016168	15	2525	ENSMUSG00000016024	Lbp	GO:0001530(lipopolysaccharide binding);GO:0002232(leukocyte chemotaxis involved in inflammatory response);GO:0002281(macrophage activation involved in immune response);GO:0002376(immune system process);GO:0005102(signaling receptor binding);GO:0005576(extracellular region);GO:0005615(extracellular space);GO:0006869(lipid transport);GO:0006953(acute-phase response);GO:0008228(opsonization);GO:0008…	04064(NF-kappa B signaling pathway);04620(Toll-like receptor signaling pathway);05132(Salmonella infection);05152(Tuberculosis)	K05399	NA	lipopolysaccharide binding protein [Source:MGI Symbol;Acc:MGI:1098776]	protein_coding	R_MMU_166016(Toll_Like_Receptor_4_(TLR4)_Cascade);R_MMU_166020(Transfer_of_LPS_from_LBP_carrier_to_CD14);R_MMU_168898(Toll_like_Receptor_Cascades);R_MMU_168256(Immune_System);R_MMU_168249(Innate_Immune_System);R_MMU_5686938(Regulation_of_TLR_by_endogenous_ligand)	49.0963	44.8714	45.9904	26.41	25.8208	30.12	1.69954	0.765141	1.47954e-11	6.67611e-09	up	no
85428	0	chr3	+	54361109	54391037	ENSMUST00000107985	22	3205	ENSMUSG00000027750	Postn	GO:0001666(response to hypoxia);GO:0001953(negative regulation of cell-matrix adhesion);GO:0003073(regulation of systemic arterial blood pressure);GO:0005201(extracellular matrix structural constituent);GO:0005515(protein binding);GO:0005576(extracellular region);GO:0005615(extracellular space);GO:0005737(cytoplasm);GO:0005794(Golgi apparatus);GO:0005802(trans-Golgi network);GO:0007155(cell adhes…	NA	NA	NA	periostin, osteoblast specific factor [Source:MGI Symbol;Acc:MGI:1926321]	protein_coding	NA	9.88936	11.4423	9.06053	28.0235	21.0354	18.331	0.45099	-1.14883	1.59412e-11	7.15567e-09	down	yes
128131	0	chr8	+	3655770	3660110	ENSMUST00000012849	5	874	ENSMUSG00000012705	Retn	GO:0005179(hormone activity);GO:0005576(extracellular region);GO:0005615(extracellular space);GO:0005634(nucleus);GO:0007165(signal transduction);GO:0010714(positive regulation of collagen metabolic process);GO:0014911(positive regulation of smooth muscle cell migration);GO:0032868(response to insulin);GO:0045444(fat cell differentiation);GO:0048661(positive regulation of smooth muscle cell proli…	NA	K13438	NA	resistin [Source:MGI Symbol;Acc:MGI:1888506]	protein_coding	R_MMU_168256(Immune_System);R_MMU_6798695(Neutrophil_degranulation);R_MMU_168249(Innate_Immune_System)	159.379	150.907	159.641	246.549	235.599	276.262	0.619621	-0.690542	1.6544e-11	7.3878e-09	down	no
89322	0	chr3	+	121723537	121735048	ENSMUST00000029771	6	1872	ENSMUSG00000028128	F3	GO:0001938(positive regulation of endothelial cell proliferation);GO:0002020(protease binding);GO:0002541(activation of plasma proteins involved in acute inflammatory response);GO:0004252(serine-type endopeptidase activity);GO:0005515(protein binding);GO:0005543(phospholipid binding);GO:0005615(extracellular space);GO:0006919(activation of cysteine-type endopeptidase activity involved in apoptoti…	04610(Complement and coagulation cascades);04933(AGE-RAGE signaling pathway in diabetic complications)	K03901	NA	coagulation factor III [Source:MGI Symbol;Acc:MGI:88381]	protein_coding	R_MMU_109582(Hemostasis);R_MMU_140834(Extrinsic_Pathway_of_Fibrin_Clot_Formation);R_MMU_140877(Formation_of_Fibrin_Clot_(Clotting_Cascade))	61.1478	54.4235	53.4488	36.0138	37.4026	36.9646	1.53124	0.614703	1.73031e-11	7.68696e-09	up	no
121842	0	chr7	-	68736995	68749241	ENSMUST00000048068	8	3905	ENSMUSG00000042659	Arrdc4	GO:0005737(cytoplasm);GO:0005768(endosome);GO:0005769(early endosome);GO:0005886(plasma membrane);GO:0015031(protein transport);GO:0016020(membrane);GO:0016567(protein ubiquitination);GO:0031410(cytoplasmic vesicle);GO:0043231(intracellular membrane-bounded organelle);GO:0051443(positive regulation of ubiquitin-protein transferase activity);GO:0140112(extracellular vesicle biogenesis);GO:1903561(…	NA	NA	NA	arrestin domain containing 4 [Source:MGI Symbol;Acc:MGI:1913662]	protein_coding	NA	8.22763	7.73391	8.81979	4.37658	4.33418	4.91649	1.81851	0.862759	1.7972e-11	7.94317e-09	up	no
24952	0	chr11	+	58199556	58207591	ENSMUST00000035266	3	2022	ENSMUSG00000078853	Igtp	GO:0003924(GTPase activity);GO:0005525(GTP binding);GO:0005789(endoplasmic reticulum membrane);GO:0005829(cytosol);GO:0006952(defense response);GO:0016020(membrane);GO:0035458(cellular response to interferon-beta)	05145(Toxoplasmosis)	K14140	NA	interferon gamma induced GTPase [Source:MGI Symbol;Acc:MGI:107729]	protein_coding	NA	41.7978	44.7016	71.3653	15.2038	10.4255	17.5199	3.65858	1.87128	1.90216e-11	8.32268e-09	up	yes
98556	0	chr4	-	156199455	156200796	ENSMUST00000085425	2	703	ENSMUSG00000035692	Isg15	GO:0005178(integrin binding);GO:0005515(protein binding);GO:0005576(extracellular region);GO:0005634(nucleus);GO:0005737(cytoplasm);GO:0007229(integrin-mediated signaling pathway);GO:0009617(response to bacterium);GO:0015935(small ribosomal subunit);GO:0019941(modification-dependent protein catabolic process);GO:0022627(cytosolic small ribosomal subunit);GO:0030501(positive regulation of bone min…	04622(RIG-I-like receptor signaling pathway);05165(Human papillomavirus infection);05169(Epstein-Barr virus infection)	K12159	NA	ISG15 ubiquitin-like modifier [Source:MGI Symbol;Acc:MGI:1855694]	protein_coding	R_MMU_1169408(ISG15_antiviral_mechanism);R_MMU_5656169(Termination_of_translesion_DNA_synthesis);R_MMU_73893(DNA_Damage_Bypass);R_MMU_168256(Immune_System);R_MMU_1280215(Cytokine_Signaling_in_Immune_system);R_MMU_110313(Translesion_synthesis_by_Y_family_DNA_polymerases_bypasses_lesions_on_DNA_template);R_MMU_913531(Interferon_Signaling);R_MMU_1169410(Antiviral_mechanism_by_IFN_stimulated_genes);R…	231.827	238.042	414.068	78.2054	55.0384	94.9	3.87447	1.954	1.90969e-11	8.32268e-09	up	yes
101707	0	chr5	-	67619161	67847431	ENSMUST00000072971	37	7154	ENSMUSG00000037685	Atp8a1	GO:0000166(nucleotide binding);GO:0000287(magnesium ion binding);GO:0005515(protein binding);GO:0005524(ATP binding);GO:0005783(endoplasmic reticulum);GO:0005794(Golgi apparatus);GO:0005802(trans-Golgi network);GO:0005886(plasma membrane);GO:0006869(lipid transport);GO:0007612(learning);GO:0015914(phospholipid transport);GO:0016020(membrane);GO:0016021(integral component of membrane);GO:0016887(A…	NA	K14802	EC:7.6.2.1	ATPase, aminophospholipid transporter (APLT), class I, type 8A, member 1 [Source:MGI Symbol;Acc:MGI:1330848]	protein_coding	R_MMU_936837(Ion_transport_by_P_type_ATPases);R_MMU_382551(Transport_of_small_molecules);R_MMU_168256(Immune_System);R_MMU_6798695(Neutrophil_degranulation);R_MMU_168249(Innate_Immune_System);R_MMU_983712(Ion_channel_transport)	0.445879	0.070482	0.597116	0	0	0	3711.59	11.8578	1.91204e-11	8.32268e-09	up	yes
67585	0	chr18	-	64499655	64516479	ENSMUST00000236873	14	2482	ENSMUSG00000024587	Nars	GO:0000166(nucleotide binding);GO:0003676(nucleic acid binding);GO:0004812(aminoacyl-tRNA ligase activity);GO:0004816(asparagine-tRNA ligase activity);GO:0005524(ATP binding);GO:0005737(cytoplasm);GO:0005739(mitochondrion);GO:0005829(cytosol);GO:0006412(translation);GO:0006418(tRNA aminoacylation for protein translation);GO:0006421(asparaginyl-tRNA aminoacylation);GO:0016477(cell migration);GO:00…	00970(Aminoacyl-tRNA biosynthesis)	K01893	EC:6.1.1.22	asparaginyl-tRNA synthetase [Source:MGI Symbol;Acc:MGI:1917473]	nonsense_mediated_decay	NA	0	0	0	14.8684	0	0	2.0177e-05	-15.5969	1.93228e-11	8.36852e-09	down	yes
124222	0	chr7	-	104409025	104465193	ENSMUST00000076922	8	3771	ENSMUSG00000030921	Trim30a	GO:0000209(protein polyubiquitination);GO:0003677(DNA binding);GO:0004842(ubiquitin-protein transferase activity);GO:0005515(protein binding);GO:0005634(nucleus);GO:0005654(nucleoplasm);GO:0005737(cytoplasm);GO:0005829(cytosol);GO:0006914(autophagy);GO:0008270(zinc ion binding);GO:0009617(response to bacterium);GO:0010468(regulation of gene expression);GO:0010508(positive regulation of autophagy)…	NA	NA	NA	tripartite motif-containing 30A [Source:MGI Symbol;Acc:MGI:98178]	protein_coding	NA	33.5298	36.8926	50.8069	14.5231	11.0835	16.9107	2.8513	1.51162	2.08961e-11	9.00466e-09	up	yes
54865	0	chr16	+	20672723	20692884	ENSMUST00000044783	33	5444	ENSMUSG00000045983	Eif4g1	GO:0001662(behavioral fear response);GO:0003723(RNA binding);GO:0003729(mRNA binding);GO:0003743(translation initiation factor activity);GO:0005515(protein binding);GO:0005524(ATP binding);GO:0005634(nucleus);GO:0005737(cytoplasm);GO:0005829(cytosol);GO:0005844(polysome);GO:0006412(translation);GO:0006413(translational initiation);GO:0006417(regulation of translation);GO:0006446(regulation of tra…	03013(RNA transport);05416(Viral myocarditis)	K03260	NA	eukaryotic translation initiation factor 4, gamma 1 [Source:MGI Symbol;Acc:MGI:2384784]	protein_coding	R_MMU_975957(Nonsense_Mediated_Decay_(NMD)_enhanced_by_the_Exon_Junction_Complex_(EJC));R_MMU_429914(Deadenylation_dependent_mRNA_decay);R_MMU_975956(Nonsense_Mediated_Decay_(NMD)_independent_of_the_Exon_Junction_Complex_(EJC));R_MMU_72766(Translation);R_MMU_1169408(ISG15_antiviral_mechanism);R_MMU_72737(Cap_dependent_Translation_Initiation);R_MMU_450408(AUF1_(hnRNP_D0)_binds_and_destabilizes_mRN…	0	0	0	0.570758	0.241636	0.120138	0.000321705	-11.602	2.30491e-11	9.88303e-09	down	yes
23753	0	chr11	-	30109948	30267214	ENSMUST00000124231	31	6524	ENSMUSG00000020315	Sptbn1	GO:0000281(mitotic cytokinesis);GO:0003779(actin binding);GO:0005200(structural constituent of cytoskeleton);GO:0005515(protein binding);GO:0005516(calmodulin binding);GO:0005543(phospholipid binding);GO:0005634(nucleus);GO:0005730(nucleolus);GO:0005737(cytoplasm);GO:0005856(cytoskeleton);GO:0005886(plasma membrane);GO:0007009(plasma membrane organization);GO:0007010(cytoskeleton organization);GO…	NA	K06115	NA	spectrin beta, non-erythrocytic 1 [Source:MGI Symbol;Acc:MGI:98388]	protein_coding	R_MMU_5653656(Vesicle_mediated_transport);R_MMU_373760(L1CAM_interactions);R_MMU_9012999(RHO_GTPase_cycle);R_MMU_199977(ER_to_Golgi_Anterograde_Transport);R_MMU_5683057(MAPK_family_signaling_cascades);R_MMU_5673001(RAF/MAP_kinase_cascade);R_MMU_9013424(RHOV_GTPase_cycle);R_MMU_948021(Transport_to_the_Golgi_and_subsequent_modification);R_MMU_9013420(RHOU_GTPase_cycle);R_MMU_375165(NCAM_signaling_f…	0	0	8.45355	0	0	0	28178.5	14.7823	2.34379e-11	9.99999e-09	up	yes
112340	0	chr6	-	93683011	94283895	ENSMUST00000203519	21	3920	ENSMUSG00000045095	Magi1	GO:0000166(nucleotide binding);GO:0005515(protein binding);GO:0005524(ATP binding);GO:0005634(nucleus);GO:0005654(nucleoplasm);GO:0005730(nucleolus);GO:0005737(cytoplasm);GO:0005886(plasma membrane);GO:0005911(cell-cell junction);GO:0005912(adherens junction);GO:0005923(bicellular tight junction);GO:0007165(signal transduction);GO:0016020(membrane);GO:0022409(positive regulation of cell-cell adhe…	04015(Rap1 signaling pathway);04151(PI3K-Akt signaling pathway);04530(Tight junction);05165(Human papillomavirus infection)	K05631	NA	membrane associated guanylate kinase, WW and PDZ domain containing 1 [Source:MGI Symbol;Acc:MGI:1203522]	protein_coding	NA	1.07366	0.120054	0.774035	0	0	0	6559.16	12.6793	2.79861e-11	1.18817e-08	up	yes
2186	0	X	-	74223461	74246398	ENSMUST00000144429	47	8233	ENSMUSG00000031328	Flna	GO:0001525(angiogenesis);GO:0001664(G protein-coupled receptor binding);GO:0001837(epithelial to mesenchymal transition);GO:0001974(blood vessel remodeling);GO:0003007(heart morphogenesis);GO:0003779(actin binding);GO:0005080(protein kinase C binding);GO:0005515(protein binding);GO:0005634(nucleus);GO:0005730(nucleolus);GO:0005737(cytoplasm);GO:0005802(trans-Golgi network);GO:0005829(cytosol);GO:…	04010(MAPK signaling pathway);04510(Focal adhesion);05132(Salmonella infection);05205(Proteoglycans in cancer)	K04437	NA	filamin, alpha [Source:MGI Symbol;Acc:MGI:95556]	nonsense_mediated_decay	R_MMU_430116(GP1b_IX_V_activation_signalling);R_MMU_109582(Hemostasis);R_MMU_446353(Cell_extracellular_matrix_interactions);R_MMU_446728(Cell_junction_organization);R_MMU_76002(Platelet_activation,_signaling_and_aggregation);R_MMU_9716542(Signaling_by_Rho_GTPases,_Miro_GTPases_and_RHOBTB3);R_MMU_114608(Platelet_degranulation);R_MMU_194315(Signaling_by_Rho_GTPases);R_MMU_5627123(RHO_GTPases_activa…	0	0	0	3.81385	0	0	7.86608e-05	-13.634	2.84039e-11	1.19999e-08	down	yes
52786	0	chr15	+	99717515	99725005	ENSMUST00000023760	8	2861	ENSMUSG00000023019	Gpd1	GO:0004367(glycerol-3-phosphate dehydrogenase [NAD+] activity);GO:0004368(glycerol-3-phosphate dehydrogenase (quinone) activity);GO:0005737(cytoplasm);GO:0005739(mitochondrion);GO:0005829(cytosol);GO:0005975(carbohydrate metabolic process);GO:0006072(glycerol-3-phosphate metabolic process);GO:0006094(gluconeogenesis);GO:0006116(NADH oxidation);GO:0006127(glycerophosphate shuttle);GO:0006734(NADH …	00564(Glycerophospholipid metabolism)	K00006	EC:1.1.1.8	glycerol-3-phosphate dehydrogenase 1 (soluble) [Source:MGI Symbol;Acc:MGI:95679]	protein_coding	R_MMU_556833(Metabolism_of_lipids);R_MMU_1430728(Metabolism);R_MMU_1483257(Phospholipid_metabolism);R_MMU_1483166(Synthesis_of_PA);R_MMU_1483206(Glycerophospholipid_biosynthesis)	1297.47	1268.62	1250.43	1583.43	1721.81	1565.39	0.783578	-0.35185	2.99026e-11	1.25715e-08	down	no
124506	0	chr7	-	105895139	105953958	ENSMUST00000176467	4	9007	ENSMUSG00000078606	Gm4070	GO:0000166(nucleotide binding);GO:0003674(molecular_function);GO:0005525(GTP binding);GO:0005575(cellular_component);GO:0005634(nucleus);GO:0005737(cytoplasm);GO:0005829(cytosol);GO:0008150(biological_process)	NA	NA	NA	predicted gene 4070 [Source:MGI Symbol;Acc:MGI:3782245]	protein_coding	NA	8.40212	9.34234	15.9791	1.73726	2.48943	3.34731	4.45254	2.15463	3.08271e-11	1.28973e-08	up	yes
124516	0	chr7	-	106156556	106215326	ENSMUST00000183409	4	9005	ENSMUSG00000045868	Gvin1	GO:0005525(GTP binding);GO:0005634(nucleus);GO:0005737(cytoplasm)	NA	NA	NA	GTPase, very large interferon inducible 1 [Source:MGI Symbol;Acc:MGI:1921808]	protein_coding	NA	4.14408	14.1287	13.4186	1.97588	1.68494	1.42792	6.22774	2.63871	3.1704e-11	1.32e-08	up	yes
84907	0	chr3	+	36869998	37053033	ENSMUST00000152564	84	15541	ENSMUSG00000037270	4932438A13Rik	GO:0001558(regulation of cell growth);GO:0003674(molecular_function);GO:0005634(nucleus);GO:0006629(lipid metabolic process);GO:0006909(phagocytosis);GO:0007283(spermatogenesis);GO:0016020(membrane);GO:0016021(integral component of membrane);GO:0016197(endosomal transport);GO:0019915(lipid storage);GO:0032456(endocytic recycling);GO:0045444(fat cell differentiation);GO:0048488(synaptic vesicle en…	NA	NA	NA	RIKEN cDNA 4932438A13 gene [Source:MGI Symbol;Acc:MGI:2444631]	protein_coding	NA	0	0	0	0	1.93077	0	0.000155379	-12.6519	3.23054e-11	1.33858e-08	down	yes
80310	0	chr2	-	126320973	126499847	ENSMUST00000040128	28	5693	ENSMUSG00000060131	Atp8b4	GO:0000166(nucleotide binding);GO:0000287(magnesium ion binding);GO:0005524(ATP binding);GO:0005794(Golgi apparatus);GO:0005802(trans-Golgi network);GO:0005886(plasma membrane);GO:0007030(Golgi organization);GO:0015914(phospholipid transport);GO:0016020(membrane);GO:0016021(integral component of membrane);GO:0045332(phospholipid translocation);GO:0046872(metal ion binding);GO:0140326(ATPase-coupl…	NA	K01530	EC:7.6.2.1	ATPase, class I, type 8B, member 4 [Source:MGI Symbol;Acc:MGI:1859664]	protein_coding	R_MMU_936837(Ion_transport_by_P_type_ATPases);R_MMU_382551(Transport_of_small_molecules);R_MMU_168256(Immune_System);R_MMU_6798695(Neutrophil_degranulation);R_MMU_168249(Innate_Immune_System);R_MMU_983712(Ion_channel_transport)	0.233423	0.210309	0.172453	0.588754	0.755158	0.652123	0.308705	-1.6957	3.37638e-11	1.39231e-08	down	yes
134750	0	chr9	+	13827716	13846541	ENSMUST00000156680	11	3760	ENSMUSG00000037808	Fam76b	GO:0005634(nucleus);GO:0016607(nuclear speck)	NA	NA	NA	family with sequence similarity 76, member B [Source:MGI Symbol;Acc:MGI:1920076]	nonsense_mediated_decay	NA	0.41169	0.772705	0.983235	0.016931	0.067941	0.029839	18.8964	4.24004	3.73859e-11	1.53433e-08	up	yes
55359	0	chr16	-	31092415	31201163	ENSMUST00000058033	22	6362	ENSMUSG00000049076	Acap2	GO:0001726(ruffle);GO:0005096(GTPase activator activity);GO:0005515(protein binding);GO:0005768(endosome);GO:0010008(endosome membrane);GO:0016020(membrane);GO:0017137(Rab GTPase binding);GO:0030029(actin filament-based process);GO:0032456(endocytic recycling);GO:0043547(positive regulation of GTPase activity);GO:0046872(metal ion binding);GO:0080025(phosphatidylinositol-3,5-bisphosphate binding)…	04144(Endocytosis)	K12489	NA	ArfGAP with coiled-coil, ankyrin repeat and PH domains 2 [Source:MGI Symbol;Acc:MGI:1925868]	protein_coding	NA	0	0	0	0	7.61289	0	3.94069e-05	-14.6312	4.03885e-11	1.64971e-08	down	yes
92923	0	chr4	+	59189257	59222833	ENSMUST00000030074	9	4012	ENSMUSG00000028381	Ugcg	GO:0000139(Golgi membrane);GO:0005794(Golgi apparatus);GO:0006497(protein lipidation);GO:0006629(lipid metabolic process);GO:0006665(sphingolipid metabolic process);GO:0006679(glucosylceramide biosynthetic process);GO:0008120(ceramide glucosyltransferase activity);GO:0009966(regulation of signal transduction);GO:0016020(membrane);GO:0016021(integral component of membrane);GO:0016740(transferase a…	00600(Sphingolipid metabolism)	K00720	EC:2.4.1.80	UDP-glucose ceramide glucosyltransferase [Source:MGI Symbol;Acc:MGI:1332243]	protein_coding	R_MMU_556833(Metabolism_of_lipids);R_MMU_1430728(Metabolism);R_MMU_1660662(Glycosphingolipid_metabolism);R_MMU_428157(Sphingolipid_metabolism)	21.1427	20.327	20.6517	13.035	11.7601	13.765	1.61102	0.687977	4.2001e-11	1.70748e-08	up	no
79709	0	chr2	+	119209027	119217049	ENSMUST00000102519	10	1505	ENSMUSG00000068580	Zfyve19	GO:0005737(cytoplasm);GO:0005813(centrosome);GO:0005815(microtubule organizing center);GO:0005856(cytoskeleton);GO:0007049(cell cycle);GO:0008289(lipid binding);GO:0009838(abscission);GO:0030496(midbody);GO:0032154(cleavage furrow);GO:0032266(phosphatidylinositol-3-phosphate binding);GO:0032466(negative regulation of cytokinesis);GO:0044878(mitotic cytokinesis checkpoint);GO:0046872(metal ion bin…	NA	NA	NA	zinc finger, FYVE domain containing 19 [Source:MGI Symbol;Acc:MGI:1919258]	protein_coding	NA	0	0	0	0.760179	0.405651	0.54415	0.000175441	-12.4767	4.31745e-11	1.74695e-08	down	yes
108747	0	chr6	+	34598565	34775466	ENSMUST00000115026	14	4080	ENSMUSG00000029761	Cald1	GO:0003779(actin binding);GO:0005516(calmodulin binding);GO:0005737(cytoplasm);GO:0005856(cytoskeleton);GO:0005884(actin filament);GO:0005886(plasma membrane);GO:0006936(muscle contraction);GO:0006940(regulation of smooth muscle contraction);GO:0014069(postsynaptic density);GO:0015629(actin cytoskeleton);GO:0016020(membrane);GO:0017022(myosin binding);GO:0030016(myofibril);GO:0030425(dendrite);GO…	04270(Vascular smooth muscle contraction)	K12327	NA	caldesmon 1 [Source:MGI Symbol;Acc:MGI:88250]	protein_coding	R_MMU_445355(Smooth_Muscle_Contraction);R_MMU_397014(Muscle_contraction)	65.0746	68.0329	71.088	52.0773	48.0944	44.0488	1.41586	0.501675	4.80201e-11	1.93393e-08	up	no
62459	0	chr17	+	37193892	37196095	ENSMUST00000038844	2	931	ENSMUSG00000035186	Ubd	GO:0001650(fibrillar center);GO:0005515(protein binding);GO:0005634(nucleus);GO:0005654(nucleoplasm);GO:0005737(cytoplasm);GO:0006511(ubiquitin-dependent protein catabolic process);GO:0016235(aggresome);GO:0016567(protein ubiquitination);GO:0032446(protein modification by small protein conjugation);GO:0034341(response to interferon-gamma);GO:0034612(response to tumor necrosis factor);GO:0043011(m…	NA	K12157	NA	ubiquitin D [Source:MGI Symbol;Acc:MGI:1344410]	protein_coding	R_MMU_8951664(Neddylation);R_MMU_597592(Post_translational_protein_modification);R_MMU_392499(Metabolism_of_proteins)	62.4595	56.6714	71.9719	30.863	34.6612	35.1087	1.89901	0.925247	4.82962e-11	1.936e-08	up	no
10953	0	chr1	+	85650050	85709998	ENSMUST00000066427	20	2708	ENSMUSG00000026222	Sp100	GO:0000723(telomere maintenance);GO:0003677(DNA binding);GO:0005515(protein binding);GO:0005634(nucleus);GO:0005737(cytoplasm);GO:0010596(negative regulation of endothelial cell migration);GO:0016605(PML body);GO:0030870(Mre11 complex);GO:0045765(regulation of angiogenesis);GO:0046826(negative regulation of protein export from nucleus);GO:0046872(metal ion binding);GO:1902041(regulation of extrin…	05168(Herpes simplex virus 1 infection);05203(Viral carcinogenesis)	K15413	NA	nuclear antigen Sp100 [Source:MGI Symbol;Acc:MGI:109561]	protein_coding	R_MMU_3108214(SUMOylation_of_DNA_damage_response_and_repair_proteins);R_MMU_597592(Post_translational_protein_modification);R_MMU_392499(Metabolism_of_proteins);R_MMU_3108232(SUMO_E3_ligases_SUMOylate_target_proteins);R_MMU_2990846(SUMOylation)	21.4951	22.6113	27.7804	10.9228	10.4287	12.8893	2.09945	1.07001	5.03949e-11	2.01078e-08	up	yes
41756	0	chr13	+	102693558	102706955	ENSMUST00000022124	3	2650	ENSMUSG00000021624	Cd180	GO:0002224(toll-like receptor signaling pathway);GO:0002322(B cell proliferation involved in immune response);GO:0002376(immune system process);GO:0004888(transmembrane signaling receptor activity);GO:0005515(protein binding);GO:0005615(extracellular space);GO:0005886(plasma membrane);GO:0006954(inflammatory response);GO:0006955(immune response);GO:0016020(membrane);GO:0016021(integral component …	NA	NA	NA	CD180 antigen [Source:MGI Symbol;Acc:MGI:1194924]	protein_coding	R_MMU_166016(Toll_Like_Receptor_4_(TLR4)_Cascade);R_MMU_168898(Toll_like_Receptor_Cascades);R_MMU_168256(Immune_System);R_MMU_168249(Innate_Immune_System)	2.47604	2.74557	2.28214	4.79865	5.10037	6.00522	0.471809	-1.08373	5.20707e-11	2.06116e-08	down	yes
124226	0	chr7	-	104470014	104507849	ENSMUST00000071069	7	3282	ENSMUSG00000057596	Trim30d	GO:0000209(protein polyubiquitination);GO:0004842(ubiquitin-protein transferase activity);GO:0005515(protein binding);GO:0005634(nucleus);GO:0005654(nucleoplasm);GO:0005737(cytoplasm);GO:0005829(cytosol);GO:0006914(autophagy);GO:0008270(zinc ion binding);GO:0010468(regulation of gene expression);GO:0010508(positive regulation of autophagy);GO:0016567(protein ubiquitination);GO:0019901(protein kin…	05170(Human immunodeficiency virus 1 infection)	K10648	EC:2.3.2.27	tripartite motif-containing 30D [Source:MGI Symbol;Acc:MGI:3035181]	protein_coding	NA	17.5233	20.7294	26.0383	9.02462	6.25889	8.80875	2.66854	1.41605	5.21359e-11	2.06116e-08	up	yes
69823	0	chr19	-	6998958	7019469	ENSMUST00000040772	15	2587	ENSMUSG00000024965	Fermt3	GO:0002102(podosome);GO:0005178(integrin binding);GO:0005515(protein binding);GO:0007155(cell adhesion);GO:0007159(leukocyte cell-cell adhesion);GO:0007160(cell-matrix adhesion);GO:0007229(integrin-mediated signaling pathway);GO:0030054(cell junction);GO:0030055(cell-substrate junction);GO:0030335(positive regulation of cell migration);GO:0033622(integrin activation);GO:0033632(regulation of cell…	04611(Platelet activation)	K17084	NA	fermitin family member 3 [Source:MGI Symbol;Acc:MGI:2147790]	protein_coding	R_MMU_109582(Hemostasis);R_MMU_76002(Platelet_activation,_signaling_and_aggregation);R_MMU_114608(Platelet_degranulation);R_MMU_76005(Response_to_elevated_platelet_cytosolic_Ca2+)	1.72561	1.82961	1.38434	4.55885	3.46475	3.88952	0.414632	-1.2701	5.46308e-11	2.14994e-08	down	yes
110141	0	chr6	+	57581000	57664632	ENSMUST00000031817	23	4767	ENSMUSG00000029798	Herc6	GO:0002244(hematopoietic progenitor cell differentiation);GO:0002376(immune system process);GO:0004842(ubiquitin-protein transferase activity);GO:0005654(nucleoplasm);GO:0005737(cytoplasm);GO:0005829(cytosol);GO:0009617(response to bacterium);GO:0016567(protein ubiquitination);GO:0016740(transferase activity);GO:0045087(innate immune response);GO:0061630(ubiquitin protein ligase activity)	NA	K22372	EC:2.3.2.-	hect domain and RLD 6 [Source:MGI Symbol;Acc:MGI:1914388]	protein_coding	R_MMU_168256(Immune_System);R_MMU_983168(Antigen_processing:_Ubiquitination_&_Proteasome_degradation);R_MMU_1280218(Adaptive_Immune_System);R_MMU_983169(Class_I_MHC_mediated_antigen_processing_&_presentation)	9.70914	11.24	17.6165	3.96826	2.98345	4.34502	3.41387	1.77141	5.62613e-11	2.20404e-08	up	yes
41806	0	chr13	-	103819607	103920295	ENSMUST00000169083	26	5435	ENSMUSG00000021709	Erbin	GO:0005102(signaling receptor binding);GO:0005176(ErbB-2 class receptor binding);GO:0005515(protein binding);GO:0005634(nucleus);GO:0005737(cytoplasm);GO:0005886(plasma membrane);GO:0006605(protein targeting);GO:0007165(signal transduction);GO:0016020(membrane);GO:0016323(basolateral plasma membrane);GO:0016607(nuclear speck);GO:0030054(cell junction);GO:0030056(hemidesmosome);GO:0031594(neuromus…	04621(NOD-like receptor signaling pathway)	K12796	NA	Erbb2 interacting protein [Source:MGI Symbol;Acc:MGI:1890169]	protein_coding	R_MMU_8980692(RHOA_GTPase_cycle);R_MMU_9013423(RAC3_GTPase_cycle);R_MMU_9652282(Drug_mediated_inhibition_of_ERBB2_signaling);R_MMU_9012999(RHO_GTPase_cycle);R_MMU_9013404(RAC2_GTPase_cycle);R_MMU_9013106(RHOC_GTPase_cycle);R_MMU_9013026(RHOB_GTPase_cycle);R_MMU_9716542(Signaling_by_Rho_GTPases,_Miro_GTPases_and_RHOBTB3);R_MMU_194315(Signaling_by_Rho_GTPases);R_MMU_9006934(Signaling_by_Receptor_Ty…	0.41462	0.159894	0.136374	0	0	0	2369.63	11.2104	5.79357e-11	2.25706e-08	up	yes
99791	0	chr5	+	30588170	30625271	ENSMUST00000066295	2	3811	ENSMUSG00000049265	Kcnk3	GO:0005216(ion channel activity);GO:0005252(open rectifier potassium channel activity);GO:0005267(potassium channel activity);GO:0005886(plasma membrane);GO:0005887(integral component of plasma membrane);GO:0006811(ion transport);GO:0006813(potassium ion transport);GO:0007420(brain development);GO:0008022(protein C-terminus binding);GO:0016020(membrane);GO:0016021(integral component of membrane);…	04925(Aldosterone synthesis and secretion);04927(Cortisol synthesis and secretion);04934(Cushing syndrome)	K04914	NA	potassium channel, subfamily K, member 3 [Source:MGI Symbol;Acc:MGI:1100509]	protein_coding	R_MMU_5576886(Phase_4_resting_membrane_potential);R_MMU_1296346(Tandem_pore_domain_potassium_channels);R_MMU_5576891(Cardiac_conduction);R_MMU_112316(Neuronal_System);R_MMU_1299316(TWIK_releated_acid_sensitive_K+_channel_(TASK));R_MMU_1296071(Potassium_Channels);R_MMU_397014(Muscle_contraction)	13.361	13.1005	12.2017	17.4966	19.3242	17.495	0.71182	-0.490415	5.81385e-11	2.25706e-08	down	no
48392	0	chr15	+	6579871	6663304	ENSMUST00000090461	18	2669	ENSMUSG00000022148	Fyb	GO:0005515(protein binding);GO:0005634(nucleus);GO:0005737(cytoplasm);GO:0005829(cytosol);GO:0005886(plasma membrane);GO:0006955(immune response);GO:0007229(integrin-mediated signaling pathway);GO:0008289(lipid binding);GO:0015629(actin cytoskeleton);GO:0030054(cell junction);GO:0032991(protein-containing complex);GO:0044877(protein-containing complex binding);GO:0050852(T cell receptor signaling…	04015(Rap1 signaling pathway)	K17698	NA	FYN binding protein [Source:MGI Symbol;Acc:MGI:1346327]	protein_coding	R_MMU_202433(Generation_of_second_messenger_molecules);R_MMU_168256(Immune_System);R_MMU_1500931(Cell_Cell_communication);R_MMU_202403(TCR_signaling);R_MMU_1280218(Adaptive_Immune_System);R_MMU_391160(Signal_regulatory_protein_family_interactions)	1.79396	1.67067	1.31098	4.61441	3.4903	4.43411	0.380865	-1.39265	6.00862e-11	2.32221e-08	down	yes
14900	0	chr1	-	173747293	173766919	ENSMUST00000111214	9	2296	ENSMUSG00000073489	Ifi204	GO:0000122(negative regulation of transcription by RNA polymerase II);GO:0000978(RNA polymerase II cis-regulatory region sequence-specific DNA binding);GO:0001227(DNA-binding transcription repressor activity, RNA polymerase II-specific);GO:0002218(activation of innate immune response);GO:0003690(double-stranded DNA binding);GO:0003712(transcription coregulator activity);GO:0005515(protein binding…	04621(NOD-like receptor signaling pathway)	K20914	NA	interferon activated gene 204 [Source:MGI Symbol;Acc:MGI:96429]	protein_coding	R_MMU_168256(Immune_System);R_MMU_6798695(Neutrophil_degranulation);R_MMU_168249(Innate_Immune_System)	80.0605	87.239	120.121	42.5137	35.1312	44.3642	2.35573	1.23618	6.09426e-11	2.34479e-08	up	yes
40120	0	chr13	-	64366479	64370306	ENSMUST00000222462	6	698	ENSMUSG00000021477	Ctsl	GO:0004175(endopeptidase activity);GO:0004177(aminopeptidase activity);GO:0004197(cysteine-type endopeptidase activity);GO:0005515(protein binding);GO:0005615(extracellular space);GO:0005634(nucleus);GO:0005730(nucleolus);GO:0005737(cytoplasm);GO:0005764(lysosome);GO:0005773(vacuole);GO:0005886(plasma membrane);GO:0005902(microvillus);GO:0006508(proteolysis);GO:0006590(thyroid hormone generation)…	04140(Autophagy - animal);04142(Lysosome);04145(Phagosome);04210(Apoptosis);04612(Antigen processing and presentation);05205(Proteoglycans in cancer);05323(Rheumatoid arthritis);05418(Fluid shear stress and atherosclerosis)	K01365	EC:3.4.22.15	cathepsin L [Source:MGI Symbol;Acc:MGI:88564]	protein_coding	R_MMU_1442490(Collagen_degradation);R_MMU_2022090(Assembly_of_collagen_fibrils_and_other_multimeric_structures);R_MMU_73857(RNA_Polymerase_II_Transcription);R_MMU_168898(Toll_like_Receptor_Cascades);R_MMU_212436(Generic_Transcription_Pathway);R_MMU_8939242(RUNX1_regulates_transcription_of_genes_involved_in_differentiation_of_keratinocytes);R_MMU_1474244(Extracellular_matrix_organization);R_MMU_14…	0	0	0	0	32.5476	0	9.21726e-06	-16.7272	6.20323e-11	2.37611e-08	down	yes
13492	0	chr1	-	153218922	153229144	ENSMUST00000161744	3	1447	ENSMUSG00000026478	Lamc1	GO:0005201(extracellular matrix structural constituent);GO:0005604(basement membrane);GO:0005606(laminin-1 complex);GO:0007155(cell adhesion);GO:0016020(membrane);GO:0016477(cell migration);GO:0022617(extracellular matrix disassembly);GO:0031012(extracellular matrix);GO:0031581(hemidesmosome assembly);GO:0034446(substrate adhesion-dependent cell spreading);GO:0062023(collagen-containing extracell…	04151(PI3K-Akt signaling pathway);04510(Focal adhesion);04512(ECM-receptor interaction);05020(Prion diseases);05145(Toxoplasmosis);05146(Amoebiasis);05165(Human papillomavirus infection);05200(Pathways in cancer);05222(Small cell lung cancer)	K05635	NA	laminin, gamma 1 [Source:MGI Symbol;Acc:MGI:99914]	protein_coding	NA	0	0	0	15.5392	0	0	1.93061e-05	-15.6606	6.28671e-11	2.39743e-08	down	yes
105383	0	chr5	-	125017155	125179180	ENSMUST00000111393	48	8661	ENSMUSG00000029478	Ncor2	GO:0000118(histone deacetylase complex);GO:0000122(negative regulation of transcription by RNA polymerase II);GO:0000785(chromatin);GO:0000790(nuclear chromatin);GO:0000977(RNA polymerase II regulatory region sequence-specific DNA binding);GO:0001701(in utero embryonic development);GO:0003007(heart morphogenesis);GO:0003677(DNA binding);GO:0003682(chromatin binding);GO:0003714(transcription corep…	04330(Notch signaling pathway);05169(Epstein-Barr virus infection)	K06065	NA	nuclear receptor co-repressor 2 [Source:MGI Symbol;Acc:MGI:1337080]	protein_coding	R_MMU_170834(Signaling_by_TGF_beta_Receptor_Complex);R_MMU_9711123(Cellular_response_to_chemical_stress);R_MMU_9006936(Signaling_by_TGFB_family_members);R_MMU_9623433(NR1H2_&_NR1H3_regulate_gene_expression_to_control_bile_acid_homeostasis);R_MMU_556833(Metabolism_of_lipids);R_MMU_1430728(Metabolism);R_MMU_2262752(Cellular_responses_to_stress);R_MMU_73857(RNA_Polymerase_II_Transcription);R_MMU_212…	0	0	0	2.54434	0	0	0.000117909	-13.05	6.70548e-11	2.54587e-08	down	yes
21291	0	chr10	-	109681259	110456204	ENSMUST00000239301	41	10740	ENSMUSG00000020181	Nav3	GO:0005515(protein binding);GO:0005524(ATP binding);GO:0007026(negative regulation of microtubule depolymerization);GO:0008017(microtubule binding);GO:0022008(neurogenesis);GO:0030336(negative regulation of cell migration);GO:0031116(positive regulation of microtubule polymerization);GO:0032703(negative regulation of interleukin-2 production);GO:1905929(positive regulation of invadopodium disasse…	NA	NA	NA	neuron navigator 3 [Source:MGI Symbol;Acc:MGI:2183703]	protein_coding	NA	0	0	0	1.9843	0	0	0.000151187	-12.6914	7.08484e-11	2.6781e-08	down	yes
1862	0	X	+	71215006	71315295	ENSMUST00000025391	14	3286	ENSMUSG00000031337	Mtm1	GO:0001726(ruffle);GO:0004438(phosphatidylinositol-3-phosphatase activity);GO:0004721(phosphoprotein phosphatase activity);GO:0004725(protein tyrosine phosphatase activity);GO:0005515(protein binding);GO:0005737(cytoplasm);GO:0005768(endosome);GO:0005770(late endosome);GO:0005829(cytosol);GO:0005886(plasma membrane);GO:0006470(protein dephosphorylation);GO:0006629(lipid metabolic process);GO:0008…	00562(Inositol phosphate metabolism);04070(Phosphatidylinositol signaling system)	K01108	3.1.3.95;EC:3.1.3.64	X-linked myotubular myopathy gene 1 [Source:MGI Symbol;Acc:MGI:1099452]	protein_coding	R_MMU_1660517(Synthesis_of_PIPs_at_the_late_endosome_membrane);R_MMU_1483255(PI_Metabolism);R_MMU_556833(Metabolism_of_lipids);R_MMU_1430728(Metabolism);R_MMU_1483257(Phospholipid_metabolism);R_MMU_1660516(Synthesis_of_PIPs_at_the_early_endosome_membrane);R_MMU_1660499(Synthesis_of_PIPs_at_the_plasma_membrane)	0	0	0	0	0.353837	0	0.000847848	-10.2039	7.34392e-11	2.76391e-08	down	yes
66949	0	chr18	+	46597701	46609249	ENSMUST00000238168	4	2012	ENSMUSG00000057561	Eif1a	GO:0003723(RNA binding);GO:0003743(translation initiation factor activity);GO:0006412(translation);GO:0006413(translational initiation);GO:0043023(ribosomal large subunit binding)	03013(RNA transport)	K03236	NA	eukaryotic translation initiation factor 1A [Source:MGI Symbol;Acc:MGI:95298]	protein_coding	NA	0	0	0	0.576186	0	0	0.000520665	-10.9074	7.5096e-11	2.81398e-08	down	yes
129634	0	chr8	+	35375739	35388129	ENSMUST00000210337	2	4349	ENSMUSG00000046794	Ppp1r3b	GO:0000164(protein phosphatase type 1 complex);GO:0004721(phosphoprotein phosphatase activity);GO:0005515(protein binding);GO:0005975(carbohydrate metabolic process);GO:0005977(glycogen metabolic process);GO:0005979(regulation of glycogen biosynthetic process);GO:0005981(regulation of glycogen catabolic process);GO:0006470(protein dephosphorylation);GO:0008157(protein phosphatase 1 binding);GO:00…	04910(Insulin signaling pathway);04931(Insulin resistance)	K07189	NA	protein phosphatase 1, regulatory subunit 3B [Source:MGI Symbol;Acc:MGI:2177268]	protein_coding	NA	12.3734	18.7241	18.4419	36.2602	35.2084	31.5242	0.480998	-1.0559	7.76102e-11	2.8956e-08	down	yes
130621	0	chr8	+	68880491	68906934	ENSMUST00000015712	10	4115	ENSMUSG00000015568	Lpl	GO:0004465(lipoprotein lipase activity);GO:0004620(phospholipase activity);GO:0004806(triglyceride lipase activity);GO:0005102(signaling receptor binding);GO:0005509(calcium ion binding);GO:0005515(protein binding);GO:0005576(extracellular region);GO:0005615(extracellular space);GO:0005886(plasma membrane);GO:0006629(lipid metabolic process);GO:0006631(fatty acid metabolic process);GO:0006633(fat…	00561(Glycerolipid metabolism);03320(PPAR signaling pathway);04979(Cholesterol metabolism);05010(Alzheimer disease)	K01059	EC:3.1.1.34	lipoprotein lipase [Source:MGI Symbol;Acc:MGI:96820]	protein_coding	R_MMU_196854(Metabolism_of_vitamins_and_cofactors);R_MMU_1430728(Metabolism);R_MMU_8963889(Assembly_of_active_LPL_and_LIPC_lipase_complexes);R_MMU_8963899(Plasma_lipoprotein_remodeling);R_MMU_382551(Transport_of_small_molecules);R_MMU_6806667(Metabolism_of_fat_soluble_vitamins);R_MMU_9709957(Sensory_Perception);R_MMU_8963901(Chylomicron_remodeling);R_MMU_174824(Plasma_lipoprotein_assembly,_remode…	955.463	1067.39	1032.36	1363	1467.94	1250.86	0.748496	-0.417934	8.57908e-11	3.18702e-08	down	no
67853	0	chr18	-	67665511	67724573	ENSMUST00000120934	10	1497	ENSMUSG00000024539	Ptpn2	GO:0000122(negative regulation of transcription by RNA polymerase II);GO:0004721(phosphoprotein phosphatase activity);GO:0004725(protein tyrosine phosphatase activity);GO:0004726(non-membrane spanning protein tyrosine phosphatase activity);GO:0005178(integrin binding);GO:0005515(protein binding);GO:0005634(nucleus);GO:0005654(nucleoplasm);GO:0005737(cytoplasm);GO:0005783(endoplasmic reticulum);GO…	04630(Jak-STAT signaling pathway)	K18026	EC:3.1.3.48	protein tyrosine phosphatase, non-receptor type 2 [Source:MGI Symbol;Acc:MGI:97806]	protein_coding	R_MMU_877300(Interferon_gamma_signaling);R_MMU_6807004(Negative_regulation_of_MET_activity);R_MMU_168256(Immune_System);R_MMU_1280215(Cytokine_Signaling_in_Immune_system);R_MMU_9006934(Signaling_by_Receptor_Tyrosine_Kinases);R_MMU_6806834(Signaling_by_MET);R_MMU_913531(Interferon_Signaling);R_MMU_162582(Signal_Transduction);R_MMU_877312(Regulation_of_IFNG_signaling)	0	0	0	0	0	0.728714	0.000411684	-11.2462	8.67624e-11	3.20928e-08	down	yes
10787	0	chr1	+	82839674	82895521	ENSMUST00000187899	12	2078	ENSMUSG00000026159	Agfg1	GO:0001675(acrosome assembly);GO:0003677(DNA binding);GO:0005096(GTPase activator activity);GO:0005634(nucleus);GO:0007275(multicellular organism development);GO:0007283(spermatogenesis);GO:0007289(spermatid nucleus differentiation);GO:0030154(cell differentiation);GO:0031410(cytoplasmic vesicle);GO:0042995(cell projection);GO:0043025(neuronal cell body);GO:0043231(intracellular membrane-bounded …	05164(Influenza A)	K15044	NA	ArfGAP with FG repeats 1 [Source:MGI Symbol;Acc:MGI:1333754]	protein_coding	R_MMU_5653656(Vesicle_mediated_transport);R_MMU_199991(Membrane_Trafficking);R_MMU_8856828(Clathrin_mediated_endocytosis)	0	0	0	0	0.533649	0	0.000562167	-10.7967	9.04967e-11	3.3331e-08	down	yes
125600	0	chr7	+	122289297	122628655	ENSMUST00000064989	17	2911	ENSMUSG00000052889	Prkcb	GO:0000166(nucleotide binding);GO:0002250(adaptive immune response);GO:0002376(immune system process);GO:0003682(chromatin binding);GO:0004672(protein kinase activity);GO:0004674(protein serine/threonine kinase activity);GO:0004697(protein kinase C activity);GO:0004698(calcium-dependent protein kinase C activity);GO:0005080(protein kinase C binding);GO:0005246(calcium channel regulator activity);…	01521(EGFR tyrosine kinase inhibitor resistance);04010(MAPK signaling pathway);04012(ErbB signaling pathway);04014(Ras signaling pathway);04015(Rap1 signaling pathway);04020(Calcium signaling pathway);04062(Chemokine signaling pathway);04064(NF-kappa B signaling pathway);04066(HIF-1 signaling pathway);04070(Phosphatidylinositol signaling system);04071(Sphingolipid signaling pathway);04150(mTOR si…	K19662	EC:2.7.11.13	protein kinase C, beta [Source:MGI Symbol;Acc:MGI:97596]	protein_coding	R_MMU_4419969(Depolymerisation_of_the_Nuclear_Lamina);R_MMU_112315(Transmission_across_Chemical_Synapses);R_MMU_399721(Glutamate_binding,_activation_of_AMPA_receptors_and_synaptic_plasticity);R_MMU_416993(Trafficking_of_GluR2_containing_AMPA_receptors);R_MMU_4420097(VEGFA_VEGFR2_Pathway);R_MMU_5099900(WNT5A_dependent_internalization_of_FZD4);R_MMU_983705(Signaling_by_the_B_Cell_Receptor_(BCR));R_…	0	0	0	0.38323	0	0	0.00078282	-10.319	9.34481e-11	3.40769e-08	down	yes
24810	0	chr11	+	54622366	54688025	ENSMUST00000094536	17	3372	ENSMUSG00000037533	Rapgef6	GO:0005085(guanyl-nucleotide exchange factor activity);GO:0005096(GTPase activator activity);GO:0005515(protein binding);GO:0005813(centrosome);GO:0005829(cytosol);GO:0005886(plasma membrane);GO:0007165(signal transduction);GO:0007264(small GTPase mediated signal transduction);GO:0016324(apical plasma membrane);GO:0017016(Ras GTPase binding);GO:0030033(microvillus assembly);GO:0030139(endocytic v…	04015(Rap1 signaling pathway);04530(Tight junction)	K08020	NA	Rap guanine nucleotide exchange factor (GEF) 6 [Source:MGI Symbol;Acc:MGI:2384761]	protein_coding	NA	0	0	0	0.328861	0	0	0.00091224	-10.0983	9.34481e-11	3.40769e-08	down	yes
70814	0	chr19	-	17326141	17356667	ENSMUST00000174236	3	4606	ENSMUSG00000038843	Gcnt1	GO:0000139(Golgi membrane);GO:0003829(beta-1,3-galactosyl-O-glycosyl-glycoprotein beta-1,6-N-acetylglucosaminyltransferase activity);GO:0005615(extracellular space);GO:0005794(Golgi apparatus);GO:0005802(trans-Golgi network);GO:0006486(protein glycosylation);GO:0009101(glycoprotein biosynthetic process);GO:0016020(membrane);GO:0016021(integral component of membrane);GO:0016740(transferase activit…	00512(Mucin type O-glycan biosynthesis)	K00727	EC:2.4.1.102	glucosaminyl (N-acetyl) transferase 1, core 2 [Source:MGI Symbol;Acc:MGI:95676]	protein_coding	R_MMU_913709(O_linked_glycosylation_of_mucins);R_MMU_5173105(O_linked_glycosylation);R_MMU_597592(Post_translational_protein_modification);R_MMU_392499(Metabolism_of_proteins)	0.112922	0.183921	0.169938	0.696142	0.556448	0.615493	0.249872	-2.00074	9.37082e-11	3.40769e-08	down	yes
50383	0	chr15	-	76047158	76069784	ENSMUST00000109946	37	5545	ENSMUSG00000022568	Scrib	GO:0001768(establishment of T cell polarity);GO:0001772(immunological synapse);GO:0001843(neural tube closure);GO:0001921(positive regulation of receptor recycling);GO:0002093(auditory receptor cell morphogenesis);GO:0003382(epithelial cell morphogenesis);GO:0005515(protein binding);GO:0005654(nucleoplasm);GO:0005737(cytoplasm);GO:0005829(cytosol);GO:0005886(plasma membrane);GO:0005911(cell-cell …	04390(Hippo signaling pathway);04530(Tight junction);05165(Human papillomavirus infection);05203(Viral carcinogenesis)	K16175	NA	scribbled planar cell polarity [Source:MGI Symbol;Acc:MGI:2145950]	protein_coding	R_MMU_9012999(RHO_GTPase_cycle);R_MMU_9696270(RND2_GTPase_cycle);R_MMU_9716542(Signaling_by_Rho_GTPases,_Miro_GTPases_and_RHOBTB3);R_MMU_9013148(CDC42_GTPase_cycle);R_MMU_194315(Signaling_by_Rho_GTPases);R_MMU_9696264(RND3_GTPase_cycle);R_MMU_162582(Signal_Transduction);R_MMU_9013406(RHOQ_GTPase_cycle)	0	0	0	0	0	0.193155	0.00155316	-9.33058	9.66912e-11	3.48768e-08	down	yes
3844	0	X	-	134804147	134809221	ENSMUST00000168264	5	3773	ENSMUSG00000033436	Armcx2	GO:0003674(molecular_function);GO:0005515(protein binding);GO:0005575(cellular_component);GO:0005739(mitochondrion);GO:0005741(mitochondrial outer membrane);GO:0008150(biological_process);GO:0016020(membrane);GO:0016021(integral component of membrane)	NA	NA	NA	armadillo repeat containing, X-linked 2 [Source:MGI Symbol;Acc:MGI:1914666]	protein_coding	NA	0.543555	0.531152	0.809082	0.058041	0.010696	0.056998	14.9822	3.90518	9.67942e-11	3.48768e-08	up	yes
23006	0	chr11	+	5861947	5872088	ENSMUST00000102923	21	3831	ENSMUSG00000020473	Aebp1	GO:0000122(negative regulation of transcription by RNA polymerase II);GO:0000977(RNA polymerase II regulatory region sequence-specific DNA binding);GO:0001227(DNA-binding transcription repressor activity, RNA polymerase II-specific);GO:0003677(DNA binding);GO:0003714(transcription corepressor activity);GO:0004180(carboxypeptidase activity);GO:0004181(metallocarboxypeptidase activity);GO:0005516(c…	NA	K21392	NA	AE binding protein 1 [Source:MGI Symbol;Acc:MGI:1197012]	protein_coding	NA	251.391	223.46	252.001	137.325	152.147	159.351	1.61946	0.695513	9.75247e-11	3.48768e-08	up	no
16919	0	chr10	+	25441573	25523517	ENSMUST00000217929	16	3621	ENSMUSG00000019978	Epb41l2	GO:0003779(actin binding);GO:0005198(structural molecule activity);GO:0005515(protein binding);GO:0005654(nucleoplasm);GO:0005737(cytoplasm);GO:0005856(cytoskeleton);GO:0005886(plasma membrane);GO:0005938(cell cortex);GO:0007049(cell cycle);GO:0008092(cytoskeletal protein binding);GO:0008180(COP9 signalosome);GO:0008360(regulation of cell shape);GO:0015629(actin cytoskeleton);GO:0016020(membrane)…	NA	K06107	NA	erythrocyte membrane protein band 4.1 like 2 [Source:MGI Symbol;Acc:MGI:103009]	protein_coding	R_MMU_6794362(Protein_protein_interactions_at_synapses);R_MMU_6794361(Neurexins_and_neuroligins);R_MMU_112316(Neuronal_System)	0	0	0	0.305052	0	0	0.000983439	-9.98988	9.78795e-11	3.48768e-08	down	yes
54443	0	chr16	-	17840361	17891657	ENSMUST00000066127	9	3790	ENSMUSG00000003166	Dgcr2	GO:0005515(protein binding);GO:0007155(cell adhesion);GO:0016020(membrane);GO:0016021(integral component of membrane)	NA	NA	NA	DiGeorge syndrome critical region gene 2 [Source:MGI Symbol;Acc:MGI:892866]	protein_coding	NA	0	0	0	0	0.290672	0	0.00103209	-9.92021	9.79871e-11	3.48768e-08	down	yes
85659	0	chr3	-	59216272	59227581	ENSMUST00000196583	4	2344	ENSMUSG00000036353	P2ry12	GO:0001609(G protein-coupled adenosine receptor activity);GO:0001621(G protein-coupled ADP receptor activity);GO:0001973(G protein-coupled adenosine receptor signaling pathway);GO:0004930(G protein-coupled receptor activity);GO:0005739(mitochondrion);GO:0005886(plasma membrane);GO:0005887(integral component of plasma membrane);GO:0005901(caveola);GO:0006930(substrate-dependent cell migration, cel…	04611(Platelet activation)	K04298	NA	purinergic receptor P2Y, G-protein coupled 12 [Source:MGI Symbol;Acc:MGI:1918089]	protein_coding	R_MMU_373076(Class_A/1_(Rhodopsin_like_receptors));R_MMU_109582(Hemostasis);R_MMU_392518(Signal_amplification);R_MMU_417957(P2Y_receptors);R_MMU_500792(GPCR_ligand_binding);R_MMU_76002(Platelet_activation,_signaling_and_aggregation);R_MMU_372790(Signaling_by_GPCR);R_MMU_388396(GPCR_downstream_signalling);R_MMU_418038(Nucleotide_like_(purinergic)_receptors);R_MMU_392170(ADP_signalling_through_P2Y_…	0.010201	0.028603	0.019452	0.272962	0.405042	0.291252	0.0601038	-4.0564	9.83357e-11	3.48768e-08	down	yes
17045	0	chr10	+	29313166	29345560	ENSMUST00000160399	6	1845	ENSMUSG00000019883	Echdc1	GO:0003824(catalytic activity);GO:0004300(enoyl-CoA hydratase activity);GO:0005737(cytoplasm);GO:0005829(cytosol);GO:0006635(fatty acid beta-oxidation);GO:0016829(lyase activity);GO:0016831(carboxy-lyase activity)	00640(Propanoate metabolism)	K18426	4.1.1.-;EC:4.1.1.94	enoyl Coenzyme A hydratase domain containing 1 [Source:MGI Symbol;Acc:MGI:1277169]	protein_coding	NA	37.6594	38.982	40.4102	53.043	52.3565	48.0091	0.763005	-0.390235	1.0317e-10	3.62997e-08	down	no
3828	0	X	+	134718013	134721908	ENSMUST00000113198	4	2085	ENSMUSG00000033460	Armcx1	GO:0003674(molecular_function);GO:0005515(protein binding);GO:0005575(cellular_component);GO:0005739(mitochondrion);GO:0005741(mitochondrial outer membrane);GO:0008150(biological_process);GO:0016020(membrane);GO:0016021(integral component of membrane)	NA	NA	NA	armadillo repeat containing, X-linked 1 [Source:MGI Symbol;Acc:MGI:1925498]	protein_coding	NA	0.399709	0.166088	0.238912	2.88716	1.81246	1.57149	0.12832	-2.96218	1.0319e-10	3.62997e-08	down	yes
88239	0	chr3	-	101040232	101110278	ENSMUST00000102694	9	5902	ENSMUSG00000027864	Ptgfrn	GO:0005515(protein binding);GO:0005783(endoplasmic reticulum);GO:0005789(endoplasmic reticulum membrane);GO:0005794(Golgi apparatus);GO:0014905(myoblast fusion involved in skeletal muscle regeneration);GO:0016020(membrane);GO:0016021(integral component of membrane);GO:0034389(lipid droplet organization)	NA	NA	NA	prostaglandin F2 receptor negative regulator [Source:MGI Symbol;Acc:MGI:1277114]	protein_coding	NA	17.9851	17.4985	19.5424	10.9603	12.3632	12.0514	1.55551	0.637384	1.04508e-10	3.66141e-08	up	no
25860	0	chr11	+	69100522	69109960	ENSMUST00000102605	22	4537	ENSMUSG00000020893	Per1	GO:0000122(negative regulation of transcription by RNA polymerase II);GO:0000976(transcription regulatory region sequence-specific DNA binding);GO:0000978(RNA polymerase II cis-regulatory region sequence-specific DNA binding);GO:0001222(transcription corepressor binding);GO:0002028(regulation of sodium ion transport);GO:0005515(protein binding);GO:0005634(nucleus);GO:0005654(nucleoplasm);GO:00057…	04710(Circadian rhythm);04713(Circadian entrainment)	K21944	NA	period circadian clock 1 [Source:MGI Symbol;Acc:MGI:1098283]	protein_coding	NA	0	0	0	0	3.93582	0	7.6223e-05	-13.6794	1.07551e-10	3.75274e-08	down	yes
102579	0	chr5	+	90772435	90773383	ENSMUST00000031320	3	588	ENSMUSG00000029373	Pf4	GO:0005125(cytokine activity);GO:0005576(extracellular region);GO:0005615(extracellular space);GO:0005737(cytoplasm);GO:0006935(chemotaxis);GO:0006952(defense response);GO:0006954(inflammatory response);GO:0006955(immune response);GO:0007165(signal transduction);GO:0007189(adenylate cyclase-activating G protein-coupled receptor signaling pathway);GO:0008009(chemokine activity);GO:0008201(heparin …	04060(Cytokine-cytokine receptor interaction);04062(Chemokine signaling pathway)	K05407	NA	platelet factor 4 [Source:MGI Symbol;Acc:MGI:1888711]	protein_coding	R_MMU_373076(Class_A/1_(Rhodopsin_like_receptors));R_MMU_380108(Chemokine_receptors_bind_chemokines);R_MMU_109582(Hemostasis);R_MMU_375276(Peptide_ligand_binding_receptors);R_MMU_500792(GPCR_ligand_binding);R_MMU_76002(Platelet_activation,_signaling_and_aggregation);R_MMU_202733(Cell_surface_interactions_at_the_vascular_wall);R_MMU_114608(Platelet_degranulation);R_MMU_372790(Signaling_by_GPCR);R_…	9.13782	7.75573	7.5977	24.2141	20.1699	34.1297	0.311936	-1.68068	1.09259e-10	3.78306e-08	down	yes
11863	0	chr1	+	105663923	105753711	ENSMUST00000190501	28	3852	ENSMUSG00000026319	Relch	GO:0005515(protein binding);GO:0005802(trans-Golgi network);GO:0032367(intracellular cholesterol transport);GO:0055037(recycling endosome)	NA	NA	NA	RAB11 binding and LisH domain, coiled-coil and HEAT repeat containing [Source:MGI Symbol;Acc:MGI:1922832]	protein_coding	NA	0	0	0	0	0.279822	0	0.00107211	-9.86533	1.10033e-10	3.78306e-08	down	yes
19089	0	chr10	+	77530380	77565708	ENSMUST00000153541	15	2619	ENSMUSG00000000290	Itgb2	GO:0002523(leukocyte migration involved in inflammatory response);GO:0005886(plasma membrane);GO:0006909(phagocytosis);GO:0007155(cell adhesion);GO:0007159(leukocyte cell-cell adhesion);GO:0007160(cell-matrix adhesion);GO:0007229(integrin-mediated signaling pathway);GO:0007568(aging);GO:0008305(integrin complex);GO:0009986(cell surface);GO:0016020(membrane);GO:0016021(integral component of membra…	04015(Rap1 signaling pathway);04145(Phagosome);04390(Hippo signaling pathway);04514(Cell adhesion molecules (CAMs));04610(Complement and coagulation cascades);04650(Natural killer cell mediated cytotoxicity);04670(Leukocyte transendothelial migration);04810(Regulation of actin cytoskeleton);05133(Pertussis);05134(Legionellosis);05140(Leishmaniasis);05144(Malaria);05146(Amoebiasis);05150(Staphyloc…	K06464	NA	integrin beta 2 [Source:MGI Symbol;Acc:MGI:96611]	nonsense_mediated_decay	R_MMU_166016(Toll_Like_Receptor_4_(TLR4)_Cascade);R_MMU_109582(Hemostasis);R_MMU_168898(Toll_like_Receptor_Cascades);R_MMU_1474244(Extracellular_matrix_organization);R_MMU_198933(Immunoregulatory_interactions_between_a_Lymphoid_and_a_non_Lymphoid_cell);R_MMU_202733(Cell_surface_interactions_at_the_vascular_wall);R_MMU_168256(Immune_System);R_MMU_6798695(Neutrophil_degranulation);R_MMU_168249(Inna…	0	0	0	0	0.410952	0	0.000730012	-10.4198	1.10033e-10	3.78306e-08	down	yes
26875	0	chr11	+	75468079	75470657	ENSMUST00000043598	5	1153	ENSMUSG00000038217	Tlcd2	GO:0003674(molecular_function);GO:0005886(plasma membrane);GO:0007009(plasma membrane organization);GO:0016020(membrane);GO:0016021(integral component of membrane);GO:0055091(phospholipid homeostasis);GO:0071709(membrane assembly);GO:0097035(regulation of membrane lipid distribution)	NA	NA	NA	TLC domain containing 2 [Source:MGI Symbol;Acc:MGI:1917141]	protein_coding	NA	41.848	44.4399	34.0612	72.2587	64.423	67.9902	0.58801	-0.766088	1.10175e-10	3.78306e-08	down	no
73695	0	chr2	+	18064636	18212388	ENSMUST00000114671	24	5063	ENSMUSG00000026743	Mllt10	GO:0003682(chromatin binding);GO:0005515(protein binding);GO:0005634(nucleus);GO:0005654(nucleoplasm);GO:0005829(cytosol);GO:0031491(nucleosome binding);GO:0032991(protein-containing complex);GO:0042393(histone binding);GO:0045944(positive regulation of transcription by RNA polymerase II);GO:0046872(metal ion binding)	NA	NA	NA	myeloid/lymphoid or mixed-lineage leukemia; translocated to, 10 [Source:MGI Symbol;Acc:MGI:1329038]	protein_coding	NA	1.52827	2.26942	1.63685	3.77891	4.94503	4.28799	0.417658	-1.2596	1.13552e-10	3.88352e-08	down	yes
35100	0	chr12	+	99964499	100062682	ENSMUST00000160413	3	3061	ENSMUSG00000045404	Kcnk13	GO:0005244(voltage-gated ion channel activity);GO:0005267(potassium channel activity);GO:0005887(integral component of plasma membrane);GO:0006811(ion transport);GO:0006813(potassium ion transport);GO:0016020(membrane);GO:0016021(integral component of membrane);GO:0022841(potassium ion leak channel activity);GO:0030322(stabilization of membrane potential);GO:0034765(regulation of ion transmembran…	NA	K04922	NA	potassium channel, subfamily K, member 13 [Source:MGI Symbol;Acc:MGI:2384976]	protein_coding	R_MMU_5576886(Phase_4_resting_membrane_potential);R_MMU_1296346(Tandem_pore_domain_potassium_channels);R_MMU_5576891(Cardiac_conduction);R_MMU_1299287(Tandem_pore_domain_halothane_inhibited_K+_channel_(THIK));R_MMU_112316(Neuronal_System);R_MMU_1296071(Potassium_Channels);R_MMU_397014(Muscle_contraction)	0	0	0	0.35028	0	0	0.000856458	-10.1893	1.14441e-10	3.89847e-08	down	yes
61419	0	chr17	+	33909445	33915590	ENSMUST00000079421	8	2581	ENSMUSG00000002307	Daxx	GO:0000775(chromosome, centromeric region);GO:0001934(positive regulation of protein phosphorylation);GO:0002039(p53 binding);GO:0003713(transcription coactivator activity);GO:0003714(transcription corepressor activity);GO:0005634(nucleus);GO:0005654(nucleoplasm);GO:0005694(chromosome);GO:0005730(nucleolus);GO:0005737(cytoplasm);GO:0006325(chromatin organization);GO:0006334(nucleosome assembly);G…	04010(MAPK signaling pathway);04210(Apoptosis);05014(Amyotrophic lateral sclerosis (ALS));05168(Herpes simplex virus 1 infection)	K02308	NA	Fas death domain-associated protein [Source:MGI Symbol;Acc:MGI:1197015]	protein_coding	R_MMU_73857(RNA_Polymerase_II_Transcription);R_MMU_9670095(Inhibition_of_DNA_recombination_at_telomere);R_MMU_212436(Generic_Transcription_Pathway);R_MMU_73886(Chromosome_Maintenance);R_MMU_1640170(Cell_Cycle);R_MMU_597592(Post_translational_protein_modification);R_MMU_6804757(Regulation_of_TP53_Degradation);R_MMU_392499(Metabolism_of_proteins);R_MMU_3700989(Transcriptional_Regulation_by_TP53);R_…	17.6154	17.1359	20.6235	11.0341	9.56734	10.4931	1.78085	0.832569	1.17763e-10	3.97229e-08	up	no
120663	0	chr7	-	45730000	45742483	ENSMUST00000210754	6	1242	ENSMUSG00000003271	Sult2b1	GO:0000103(sulfate assimilation);GO:0003676(nucleic acid binding);GO:0004027(alcohol sulfotransferase activity);GO:0005634(nucleus);GO:0005737(cytoplasm);GO:0005783(endoplasmic reticulum);GO:0005829(cytosol);GO:0006629(lipid metabolic process);GO:0008146(sulfotransferase activity);GO:0008202(steroid metabolic process);GO:0008203(cholesterol metabolic process);GO:0008285(negative regulation of cel…	00140(Steroid hormone biosynthesis)	K01015	EC:2.8.2.2	sulfotransferase family, cytosolic, 2B, member 1 [Source:MGI Symbol;Acc:MGI:1926342]	protein_coding	R_MMU_1430728(Metabolism);R_MMU_156580(Phase_II_Conjugation_of_compounds);R_MMU_211859(Biological_oxidations);R_MMU_156584(Cytosolic_sulfonation_of_small_molecules)	0	0	0	0	0.852934	0	0.000351727	-11.4733	1.17991e-10	3.97229e-08	down	yes
85268	0	chr3	-	51255663	51277415	ENSMUST00000091144	6	2366	ENSMUSG00000037174	Elf2	GO:0000981(DNA-binding transcription factor activity, RNA polymerase II-specific);GO:0003677(DNA binding);GO:0003700(DNA-binding transcription factor activity);GO:0005515(protein binding);GO:0005634(nucleus);GO:0005654(nucleoplasm);GO:0005829(cytosol);GO:0006355(regulation of transcription, DNA-templated);GO:0006357(regulation of transcription by RNA polymerase II);GO:0016604(nuclear body);GO:003…	NA	K09428	NA	E74-like factor 2 [Source:MGI Symbol;Acc:MGI:1916507]	protein_coding	R_MMU_8939245(RUNX1_regulates_transcription_of_genes_involved_in_BCR_signaling);R_MMU_73857(RNA_Polymerase_II_Transcription);R_MMU_212436(Generic_Transcription_Pathway);R_MMU_74160(Gene_expression_(Transcription));R_MMU_8878171(Transcriptional_regulation_by_RUNX1)	0	0	0	0	0.449074	0	0.000668041	-10.5478	1.17991e-10	3.97229e-08	down	yes
26336	0	chr11	-	70644196	70647058	ENSMUST00000014750	8	1711	ENSMUSG00000014606	Slc25a11	GO:0005739(mitochondrion);GO:0005743(mitochondrial inner membrane);GO:0008272(sulfate transport);GO:0015116(sulfate transmembrane transporter activity);GO:0015117(thiosulfate transmembrane transporter activity);GO:0015131(oxaloacetate transmembrane transporter activity);GO:0015139(alpha-ketoglutarate transmembrane transporter activity);GO:0015140(malate transmembrane transporter activity);GO:0015…	NA	K15104	NA	solute carrier family 25 (mitochondrial carrier oxoglutarate carrier), member 11 [Source:MGI Symbol;Acc:MGI:1915113]	protein_coding	R_MMU_71387(Metabolism_of_carbohydrates);R_MMU_1430728(Metabolism);R_MMU_70263(Gluconeogenesis);R_MMU_70326(Glucose_metabolism)	45.0866	41.7137	41.106	64.4976	58.646	59.3426	0.70091	-0.512699	1.22112e-10	4.09502e-08	down	no
122346	0	chr7	-	80325296	80340171	ENSMUST00000238999	20	3180	ENSMUSG00000030533	Unc45a	GO:0005515(protein binding);GO:0005634(nucleus);GO:0005737(cytoplasm);GO:0005794(Golgi apparatus);GO:0005829(cytosol);GO:0007275(multicellular organism development);GO:0007517(muscle organ development);GO:0016020(membrane);GO:0016021(integral component of membrane);GO:0016607(nuclear speck);GO:0030154(cell differentiation);GO:0048471(perinuclear region of cytoplasm);GO:0051879(Hsp90 protein bindi…	NA	K21991	NA	unc-45 myosin chaperone A [Source:MGI Symbol;Acc:MGI:2142246]	processed_transcript	NA	10.6063	0	0	0	0	0	35354.2	15.1096	1.23601e-10	4.12889e-08	up	yes
76608	0	chr2	-	62595798	62646211	ENSMUST00000028259	16	5470	ENSMUSG00000026896	Ifih1	GO:0000166(nucleotide binding);GO:0002376(immune system process);GO:0003677(DNA binding);GO:0003723(RNA binding);GO:0003724(RNA helicase activity);GO:0003725(double-stranded RNA binding);GO:0003727(single-stranded RNA binding);GO:0004386(helicase activity);GO:0005515(protein binding);GO:0005524(ATP binding);GO:0005634(nucleus);GO:0005737(cytoplasm);GO:0008270(zinc ion binding);GO:0009615(response…	04622(RIG-I-like receptor signaling pathway);05161(Hepatitis B);05162(Measles);05164(Influenza A);05168(Herpes simplex virus 1 infection)	K12647	EC:3.6.4.13	interferon induced with helicase C domain 1 [Source:MGI Symbol;Acc:MGI:1918836]	protein_coding	R_MMU_5689880(Ub_specific_processing_proteases);R_MMU_597592(Post_translational_protein_modification);R_MMU_392499(Metabolism_of_proteins);R_MMU_5688426(Deubiquitination)	15.0828	16.6944	21.2738	8.14508	6.37886	8.48854	2.30532	1.20496	1.26303e-10	4.20287e-08	up	yes
2	0	MT	+	70	1024	ENSMUST00000082388	1	955	ENSMUSG00000064337	mt-Rnr1	NA	NA	NA	NA	mitochondrially encoded 12S rRNA [Source:MGI Symbol;Acc:MGI:102493]	Mt_rRNA	NA	1592.5	1773.23	2162.64	1088.09	1101.32	946.774	1.76277	0.817844	1.35922e-10	4.50556e-08	up	no
83017	0	chr2	-	167607850	167661496	ENSMUST00000125544	8	2367	ENSMUSG00000089739	Gm20431	GO:0000209(protein polyubiquitination);GO:0005634(nucleus);GO:0006301(postreplication repair);GO:0006631(fatty acid metabolic process);GO:0016020(membrane);GO:0016021(integral component of membrane);GO:0061631(ubiquitin conjugating enzyme activity);GO:0070534(protein K63-linked ubiquitination)	NA	NA	NA	predicted gene 20431 [Source:MGI Symbol;Acc:MGI:5141896]	protein_coding	NA	0	0	0	0	0	6.41179	4.67888e-05	-14.3835	1.39328e-10	4.60077e-08	down	yes
33070	0	chr12	+	55239326	55263020	ENSMUST00000164243	15	2317	ENSMUSG00000079108	Srp54c	GO:0000166(nucleotide binding);GO:0003723(RNA binding);GO:0003924(GTPase activity);GO:0005525(GTP binding);GO:0005737(cytoplasm);GO:0005786(signal recognition particle, endoplasmic reticulum targeting);GO:0005829(cytosol);GO:0006614(SRP-dependent cotranslational protein targeting to membrane);GO:0006616(SRP-dependent cotranslational protein targeting to membrane, translocation);GO:0008312(7S RNA …	03060(Protein export)	K03106	EC:3.6.5.4	signal recognition particle 54C [Source:MGI Symbol;Acc:MGI:3714359]	protein_coding	NA	11.2336	0	0	0	0	0	37445.4	15.1925	1.40632e-10	4.62608e-08	up	yes
129134	0	chr8	-	24949611	25016922	ENSMUST00000084035	22	3985	ENSMUSG00000031555	Adam9	GO:0000186(activation of MAPKK activity);GO:0004222(metalloendopeptidase activity);GO:0005080(protein kinase C binding);GO:0005178(integrin binding);GO:0005515(protein binding);GO:0005518(collagen binding);GO:0005615(extracellular space);GO:0005737(cytoplasm);GO:0005886(plasma membrane);GO:0006508(proteolysis);GO:0006509(membrane protein ectodomain proteolysis);GO:0007155(cell adhesion);GO:000716…	NA	K06834	EC:3.4.24.-	a disintegrin and metallopeptidase domain 9 (meltrin gamma) [Source:MGI Symbol;Acc:MGI:105376]	protein_coding	NA	0	0	0	0	0	3.79223	7.91092e-05	-13.6258	1.41954e-10	4.65183e-08	down	yes
60338	0	chr17	+	28328597	28330909	ENSMUST00000232867	6	511	ENSMUSG00000037805	Rpl10a	GO:0003723(RNA binding);GO:0003735(structural constituent of ribosome);GO:0005840(ribosome);GO:0006412(translation);GO:0015934(large ribosomal subunit);GO:0022625(cytosolic large ribosomal subunit);GO:0045471(response to ethanol)	03010(Ribosome)	K02865	NA	ribosomal protein L10A [Source:MGI Symbol;Acc:MGI:1343877]	protein_coding	NA	0	0	0	29.8498	0	0	1.00503e-05	-16.6024	1.54908e-10	5.05711e-08	down	yes
13018	0	chr1	-	136270606	136345698	ENSMUST00000192314	18	4916	ENSMUSG00000041570	Camsap2	GO:0000226(microtubule cytoskeleton organization);GO:0005515(protein binding);GO:0005516(calmodulin binding);GO:0005737(cytoplasm);GO:0005794(Golgi apparatus);GO:0005813(centrosome);GO:0005829(cytosol);GO:0005856(cytoskeleton);GO:0005874(microtubule);GO:0007026(negative regulation of microtubule depolymerization);GO:0008017(microtubule binding);GO:0030507(spectrin binding);GO:0031113(regulation o…	NA	K17493	NA	calmodulin regulated spectrin-associated protein family, member 2 [Source:MGI Symbol;Acc:MGI:1922434]	protein_coding	NA	0	0	0	3.07581	0	0	9.75351e-05	-13.3237	1.56506e-10	5.08999e-08	down	yes
50223	0	chr15	-	74994878	74998031	ENSMUST00000187994	4	955	ENSMUSG00000075602	Ly6a	GO:0005515(protein binding);GO:0005886(plasma membrane);GO:0009617(response to bacterium);GO:0009897(external side of plasma membrane);GO:0016020(membrane);GO:0030550(acetylcholine receptor inhibitor activity);GO:0031225(anchored component of membrane);GO:0033130(acetylcholine receptor binding);GO:0045202(synapse);GO:0095500(acetylcholine receptor signaling pathway);GO:2000272(negative regulation…	NA	K06846	NA	lymphocyte antigen 6 complex, locus A [Source:MGI Symbol;Acc:MGI:107527]	protein_coding	NA	512.085	419.26	618.963	191.312	215.699	258.173	2.33064	1.22073	1.63268e-10	5.28996e-08	up	yes
113529	0	chr6	+	121245906	121270917	ENSMUST00000032198	11	1771	ENSMUSG00000030107	Usp18	GO:0004197(cysteine-type endopeptidase activity);GO:0004843(thiol-dependent ubiquitin-specific protease activity);GO:0005515(protein binding);GO:0005634(nucleus);GO:0005829(cytosol);GO:0006508(proteolysis);GO:0006511(ubiquitin-dependent protein catabolic process);GO:0008233(peptidase activity);GO:0008234(cysteine-type peptidase activity);GO:0009617(response to bacterium);GO:0016579(protein deubiq…	NA	K11846	EC:3.4.19.12	ubiquitin specific peptidase 18 [Source:MGI Symbol;Acc:MGI:1344364]	protein_coding	R_MMU_5689880(Ub_specific_processing_proteases);R_MMU_1169408(ISG15_antiviral_mechanism);R_MMU_912694(Regulation_of_IFNA_signaling);R_MMU_597592(Post_translational_protein_modification);R_MMU_392499(Metabolism_of_proteins);R_MMU_168256(Immune_System);R_MMU_5688426(Deubiquitination);R_MMU_1280215(Cytokine_Signaling_in_Immune_system);R_MMU_913531(Interferon_Signaling);R_MMU_1169410(Antiviral_mechan…	53.6942	52.969	83.4892	18.318	12.8723	23.4861	3.47778	1.79817	1.69557e-10	5.47313e-08	up	yes
71752	0	chr19	-	40295049	40402267	ENSMUST00000165469	22	2145	ENSMUSG00000025006	Sorbs1	GO:0005158(insulin receptor binding);GO:0005515(protein binding);GO:0005634(nucleus);GO:0005813(centrosome);GO:0005925(focal adhesion);GO:0030159(receptor signaling complex adaptor activity)	03320(PPAR signaling pathway);04520(Adherens junction);04910(Insulin signaling pathway)	K06086	NA	sorbin and SH3 domain containing 1 [Source:MGI Symbol;Acc:MGI:700014]	protein_coding	R_MMU_445355(Smooth_Muscle_Contraction);R_MMU_397014(Muscle_contraction)	0	0	0	0	6.73879	0	4.45184e-05	-14.4552	1.74772e-10	5.61765e-08	down	yes
80017	0	chr2	-	121194838	121271341	ENSMUST00000110647	27	9405	ENSMUSG00000043909	Trp53bp1	GO:0000077(DNA damage checkpoint);GO:0000775(chromosome, centromeric region);GO:0000776(kinetochore);GO:0000777(condensed chromosome kinetochore);GO:0000781(chromosome, telomeric region);GO:0000784(nuclear chromosome, telomeric region);GO:0001102(RNA polymerase II activating transcription factor binding);GO:0002039(p53 binding);GO:0003677(DNA binding);GO:0003684(damaged DNA binding);GO:0003712(tr…	04621(NOD-like receptor signaling pathway)	K20915	NA	transformation related protein 53 binding protein 1 [Source:MGI Symbol;Acc:MGI:1351320]	protein_coding	R_MMU_69620(Cell_Cycle_Checkpoints);R_MMU_5693567(HDR_through_Homologous_Recombination_(HRR)_or_Single_Strand_Annealing_(SSA));R_MMU_1640170(Cell_Cycle);R_MMU_69481(G2/M_Checkpoints);R_MMU_5693538(Homology_Directed_Repair);R_MMU_597592(Post_translational_protein_modification);R_MMU_69473(G2/M_DNA_damage_checkpoint);R_MMU_392499(Metabolism_of_proteins);R_MMU_3108232(SUMO_E3_ligases_SUMOylate_targe…	0	0	0	1.99807	0	0	0.000150145	-12.7014	1.75783e-10	5.61765e-08	down	yes
133783	0	chr8	+	120114152	120165306	ENSMUST00000034281	13	5564	ENSMUSG00000031824	6430548M08Rik	GO:0003674(molecular_function);GO:0005575(cellular_component);GO:0008150(biological_process)	NA	NA	NA	RIKEN cDNA 6430548M08 gene [Source:MGI Symbol;Acc:MGI:2443793]	protein_coding	NA	0	0	0	2.58019	0	0	0.000116271	-13.0702	1.75989e-10	5.61765e-08	down	yes
24238	0	chr11	-	48865249	48871420	ENSMUST00000097271	2	2082	ENSMUSG00000046879	Irgm1	GO:0000045(autophagosome assembly);GO:0000139(Golgi membrane);GO:0000166(nucleotide binding);GO:0000421(autophagosome membrane);GO:0001891(phagocytic cup);GO:0002376(immune system process);GO:0003924(GTPase activity);GO:0005525(GTP binding);GO:0005764(lysosome);GO:0005765(lysosomal membrane);GO:0005768(endosome);GO:0005770(late endosome);GO:0005776(autophagosome);GO:0005783(endoplasmic reticulum)…	05145(Toxoplasmosis)	K14139	EC:3.6.5.-	immunity-related GTPase family M member 1 [Source:MGI Symbol;Acc:MGI:107567]	protein_coding	NA	42.1824	43.0953	66.5499	19.8412	13.2535	18.7537	2.9283	1.55006	1.99135e-10	6.333e-08	up	yes
36773	0	chr13	+	3538130	3565820	ENSMUST00000059515	10	2077	ENSMUSG00000021218	Gdi2	GO:0005092(GDP-dissociation inhibitor activity);GO:0005093(Rab GDP-dissociation inhibitor activity);GO:0005096(GTPase activator activity);GO:0005515(protein binding);GO:0005737(cytoplasm);GO:0005794(Golgi apparatus);GO:0007264(small GTPase mediated signal transduction);GO:0015031(protein transport);GO:0016020(membrane);GO:0016192(vesicle-mediated transport);GO:0017137(Rab GTPase binding);GO:00312…	NA	K17255	NA	guanosine diphosphate (GDP) dissociation inhibitor 2 [Source:MGI Symbol;Acc:MGI:99845]	protein_coding	R_MMU_5653656(Vesicle_mediated_transport);R_MMU_168256(Immune_System);R_MMU_199991(Membrane_Trafficking);R_MMU_6798695(Neutrophil_degranulation);R_MMU_168249(Innate_Immune_System);R_MMU_8876198(RAB_GEFs_exchange_GTP_for_GDP_on_RABs);R_MMU_9007101(Rab_regulation_of_trafficking)	0	0	0	6.5164	0	0	4.60377e-05	-14.4068	2.03535e-10	6.42587e-08	down	yes
69351	0	chr19	-	5651194	5663620	ENSMUST00000080824	17	3741	ENSMUSG00000056917	Sipa1	GO:0005096(GTPase activator activity);GO:0005515(protein binding);GO:0008022(protein C-terminus binding);GO:0030133(transport vesicle);GO:0032991(protein-containing complex);GO:0042631(cellular response to water deprivation);GO:0043547(positive regulation of GTPase activity);GO:0051056(regulation of small GTPase mediated signal transduction)	04015(Rap1 signaling pathway);04670(Leukocyte transendothelial migration)	K08013	NA	signal-induced proliferation associated gene 1 [Source:MGI Symbol;Acc:MGI:107576]	protein_coding	R_MMU_168256(Immune_System);R_MMU_392517(Rap1_signalling);R_MMU_1280218(Adaptive_Immune_System)	0.248212	0.195668	0.137554	0	0	0	1938.11	10.9204	2.04104e-10	6.42587e-08	up	yes
79904	0	chr2	+	120567697	120601255	ENSMUST00000116437	9	2730	ENSMUSG00000027287	Snap23	GO:0002553(histamine secretion by mast cell);GO:0005484(SNAP receptor activity);GO:0005515(protein binding);GO:0005654(nucleoplasm);GO:0005737(cytoplasm);GO:0005739(mitochondrion);GO:0005886(plasma membrane);GO:0005912(adherens junction);GO:0006887(exocytosis);GO:0006906(vesicle fusion);GO:0015031(protein transport);GO:0016020(membrane);GO:0016082(synaptic vesicle priming);GO:0016192(vesicle-medi…	04130(SNARE interactions in vesicular transport);04611(Platelet activation)	K08508	NA	synaptosomal-associated protein 23 [Source:MGI Symbol;Acc:MGI:109356]	protein_coding	R_MMU_8980692(RHOA_GTPase_cycle);R_MMU_5653656(Vesicle_mediated_transport);R_MMU_9013423(RAC3_GTPase_cycle);R_MMU_9012999(RHO_GTPase_cycle);R_MMU_9035034(RHOF_GTPase_cycle);R_MMU_1236975(Antigen_processing_Cross_presentation);R_MMU_1236974(ER_Phagosome_pathway);R_MMU_9013026(RHOB_GTPase_cycle);R_MMU_168256(Immune_System);R_MMU_9716542(Signaling_by_Rho_GTPases,_Miro_GTPases_and_RHOBTB3);R_MMU_9013…	0	0	0	0	4.93897	0	6.07414e-05	-14.007	2.0445e-10	6.42587e-08	down	yes
6	0	MT	+	2751	3707	ENSMUST00000082392	1	957	ENSMUSG00000064341	mt-Nd1	GO:0005739(mitochondrion);GO:0005743(mitochondrial inner membrane);GO:0005747(mitochondrial respiratory chain complex I);GO:0008137(NADH dehydrogenase (ubiquinone) activity);GO:0009060(aerobic respiration);GO:0014070(response to organic cyclic compound);GO:0016020(membrane);GO:0016021(integral component of membrane);GO:0016491(oxidoreductase activity);GO:0030425(dendrite);GO:0031966(mitochondrial…	00190(Oxidative phosphorylation);04714(Thermogenesis);04723(Retrograde endocannabinoid signaling);05012(Parkinson disease)	K03878	EC:7.1.1.2	mitochondrially encoded NADH dehydrogenase 1 [Source:MGI Symbol;Acc:MGI:101787]	protein_coding	R_MMU_1430728(Metabolism);R_MMU_6799198(Complex_I_biogenesis);R_MMU_611105(Respiratory_electron_transport);R_MMU_163200(Respiratory_electron_transport,_ATP_synthesis_by_chemiosmotic_coupling,_and_heat_production_by_uncoupling_proteins.);R_MMU_1428517(The_citric_acid_(TCA)_cycle_and_respiratory_electron_transport)	4537.78	5703.72	4716.74	8386.4	8577.48	6868.71	0.627638	-0.671996	2.05037e-10	6.42587e-08	down	no
29676	0	chr11	-	104333545	104441702	ENSMUST00000106971	15	5222	ENSMUSG00000018412	Kansl1	GO:0000123(histone acetyltransferase complex);GO:0000775(chromosome, centromeric region);GO:0000776(kinetochore);GO:0000777(condensed chromosome kinetochore);GO:0005634(nucleus);GO:0005654(nucleoplasm);GO:0005694(chromosome);GO:0006325(chromatin organization);GO:0035035(histone acetyltransferase binding);GO:0043981(histone H4-K5 acetylation);GO:0043982(histone H4-K8 acetylation);GO:0043984(histon…	NA	K18400	NA	KAT8 regulatory NSL complex subunit 1 [Source:MGI Symbol;Acc:MGI:1923969]	protein_coding	R_MMU_3214847(HATs_acetylate_histones);R_MMU_3247509(Chromatin_modifying_enzymes);R_MMU_4839726(Chromatin_organization)	0	0	0	0	2.55832	0	0.000117264	-13.0579	2.10526e-10	6.57396e-08	down	yes
12162	0	chr1	-	120226423	120265284	ENSMUST00000112640	5	2752	ENSMUSG00000026389	Steap3	GO:0005737(cytoplasm);GO:0005768(endosome);GO:0005771(multivesicular body);GO:0009306(protein secretion);GO:0010008(endosome membrane);GO:0016020(membrane);GO:0016021(integral component of membrane);GO:0055072(iron ion homeostasis)	04115(p53 signaling pathway);04216(Ferroptosis)	K10142	EC:1.16.1.-	STEAP family member 3 [Source:MGI Symbol;Acc:MGI:1915678]	protein_coding	R_MMU_5633008(TP53_Regulates_Transcription_of_Cell_Death_Genes);R_MMU_9013405(RHOD_GTPase_cycle);R_MMU_9012999(RHO_GTPase_cycle);R_MMU_73857(RNA_Polymerase_II_Transcription);R_MMU_212436(Generic_Transcription_Pathway);R_MMU_9035034(RHOF_GTPase_cycle);R_MMU_6803204(TP53_Regulates_Transcription_of_Genes_Involved_in_Cytochrome_C_Release);R_MMU_382551(Transport_of_small_molecules);R_MMU_3700989(Trans…	29.2096	26.8759	28.9916	17.1392	18.5643	19.113	1.55203	0.634159	2.2832e-10	7.08052e-08	up	no
62044	0	chr17	+	35320558	35325099	ENSMUST00000073208	8	2024	ENSMUSG00000079507	H2-Q1	GO:0002476(antigen processing and presentation of endogenous peptide antigen via MHC class Ib);GO:0005102(signaling receptor binding);GO:0005615(extracellular space);GO:0005783(endoplasmic reticulum);GO:0005794(Golgi apparatus);GO:0005797(Golgi medial cisterna);GO:0005886(plasma membrane);GO:0006955(immune response);GO:0009897(external side of plasma membrane);GO:0009986(cell surface);GO:0016020(…	04144(Endocytosis);04145(Phagosome);04218(Cellular senescence);04514(Cell adhesion molecules (CAMs));04612(Antigen processing and presentation);04650(Natural killer cell mediated cytotoxicity);04940(Type I diabetes mellitus);05163(Human cytomegalovirus infection);05165(Human papillomavirus infection);05166(Human T-cell leukemia virus 1 infection);05167(Kaposi sarcoma-associated herpesvirus infect…	K06751	NA	histocompatibility 2, Q region locus 1 [Source:MGI Symbol;Acc:MGI:95928]	protein_coding	R_MMU_1236977(Endosomal/Vacuolar_pathway);R_MMU_1236975(Antigen_processing_Cross_presentation);R_MMU_1236974(ER_Phagosome_pathway);R_MMU_198933(Immunoregulatory_interactions_between_a_Lymphoid_and_a_non_Lymphoid_cell);R_MMU_168256(Immune_System);R_MMU_983170(Antigen_Presentation:_Folding,_assembly_and_peptide_loading_of_class_I_MHC);R_MMU_6798695(Neutrophil_degranulation);R_MMU_168249(Innate_Immu…	0	0	0	0	0	6.1956	4.84214e-05	-14.334	2.28391e-10	7.08052e-08	down	yes
32502	0	chr12	-	31958480	32060589	ENSMUST00000146865	11	3133	ENSMUSG00000002997	Prkar2b	GO:0000166(nucleotide binding);GO:0001932(regulation of protein phosphorylation);GO:0004862(cAMP-dependent protein kinase inhibitor activity);GO:0005515(protein binding);GO:0005737(cytoplasm);GO:0005813(centrosome);GO:0005886(plasma membrane);GO:0005952(cAMP-dependent protein kinase complex);GO:0006631(fatty acid metabolic process);GO:0007612(learning);GO:0008603(cAMP-dependent protein kinase reg…	04910(Insulin signaling pathway)	K04739	NA	protein kinase, cAMP dependent regulatory, type II beta [Source:MGI Symbol;Acc:MGI:97760]	protein_coding	R_MMU_380287(Centrosome_maturation);R_MMU_163685(Integration_of_energy_metabolism);R_MMU_112040(G_protein_mediated_events);R_MMU_112315(Transmission_across_Chemical_Synapses);R_MMU_111997(CaM_pathway);R_MMU_5358351(Signaling_by_Hedgehog);R_MMU_380259(Loss_of_Nlp_from_mitotic_centrosomes);R_MMU_2565942(Regulation_of_PLK1_Activity_at_G2/M_Transition);R_MMU_109582(Hemostasis);R_MMU_1430728(Metabolis…	3.35861	1.91024	2.47808	0.105215	0.318772	0.048098	16.41	4.03651	2.35728e-10	7.28179e-08	up	yes
8122	0	chr1	-	24612775	24613119	ENSMUST00000188299	1	345	ENSMUSG00000101939	Gm28438	NA	NA	NA	NA	predicted gene 28438 [Source:MGI Symbol;Acc:MGI:5579144]	unprocessed_pseudogene	NA	590.914	720.718	697.414	1206.92	1320.54	956.731	0.576619	-0.79431	2.36892e-10	7.29163e-08	down	no
108964	0	chr6	-	39086410	39118349	ENSMUST00000038398	12	3231	ENSMUSG00000038507	Parp12	GO:0003950(NAD+ ADP-ribosyltransferase activity);GO:0005575(cellular_component);GO:0005634(nucleus);GO:0016740(transferase activity);GO:0046872(metal ion binding);GO:0070213(protein auto-ADP-ribosylation);GO:0140289(protein mono-ADP-ribosylation);GO:1990404(protein ADP-ribosylase activity)	NA	K15259	EC:2.4.2.30	poly (ADP-ribose) polymerase family, member 12 [Source:MGI Symbol;Acc:MGI:2143990]	protein_coding	NA	25.0451	26.9958	35.1006	14.3807	12.5838	14.8833	2.08234	1.05821	2.43328e-10	7.46305e-08	up	yes
29570	0	chr11	+	103101688	103112199	ENSMUST00000024492	10	2076	ENSMUSG00000056938	Acbd4	GO:0000062(fatty-acyl-CoA binding);GO:0003674(molecular_function);GO:0005575(cellular_component);GO:0008150(biological_process);GO:0016020(membrane);GO:0016021(integral component of membrane)	NA	NA	NA	acyl-Coenzyme A binding domain containing 4 [Source:MGI Symbol;Acc:MGI:1914381]	protein_coding	R_MMU_390918(Peroxisomal_lipid_metabolism);R_MMU_556833(Metabolism_of_lipids);R_MMU_1430728(Metabolism);R_MMU_8978868(Fatty_acid_metabolism)	0	0	0	0	7.55536	0	3.97069e-05	-14.6203	2.59463e-10	7.92972e-08	down	yes
18035	0	chr10	+	58371454	58424691	ENSMUST00000238939	10	4351	ENSMUSG00000019920	Lims1	GO:0005886(plasma membrane);GO:0005925(focal adhesion);GO:0016020(membrane);GO:0030054(cell junction);GO:0032991(protein-containing complex);GO:0044877(protein-containing complex binding);GO:0046872(metal ion binding)	NA	NA	NA	LIM and senescent cell antigen-like domains 1 [Source:MGI Symbol;Acc:MGI:1195263]	protein_coding	R_MMU_446353(Cell_extracellular_matrix_interactions);R_MMU_446728(Cell_junction_organization);R_MMU_446388(Regulation_of_cytoskeletal_remodeling_and_cell_spreading_by_IPP_complex_components);R_MMU_1500931(Cell_Cell_communication)	0	0	0	2.77332	0	0	0.000108174	-13.1744	2.61213e-10	7.95501e-08	down	yes
11572	0	chr1	+	93168725	93231072	ENSMUST00000138595	32	7132	ENSMUSG00000084989	Crocc2	GO:0003674(molecular_function);GO:0005575(cellular_component);GO:0008150(biological_process)	NA	NA	NA	ciliary rootlet coiled-coil, rootletin family member 2 [Source:MGI Symbol;Acc:MGI:3045962]	protein_coding	NA	1.22305	1.28831	1.27961	0.691662	0.570373	0.669409	1.96277	0.972889	2.80739e-10	8.51953e-08	up	no
34549	0	chr12	+	85599027	85639878	ENSMUST00000177587	4	1645	ENSMUSG00000034271	Jdp2	GO:0000122(negative regulation of transcription by RNA polymerase II);GO:0000978(RNA polymerase II cis-regulatory region sequence-specific DNA binding);GO:0000981(DNA-binding transcription factor activity, RNA polymerase II-specific);GO:0001227(DNA-binding transcription repressor activity, RNA polymerase II-specific);GO:0003677(DNA binding);GO:0003682(chromatin binding);GO:0003690(double-stranded…	NA	K09033	NA	Jun dimerization protein 2 [Source:MGI Symbol;Acc:MGI:1932093]	protein_coding	NA	0.76081	1.56928	1.34839	0.040253	0	0	91.3842	6.51387	2.85693e-10	8.63945e-08	up	yes
15374	0	chr1	-	181904400	182019990	ENSMUST00000111024	16	3572	ENSMUSG00000022995	Enah	GO:0001725(stress fiber);GO:0001843(neural tube closure);GO:0003779(actin binding);GO:0005515(protein binding);GO:0005522(profilin binding);GO:0005737(cytoplasm);GO:0005829(cytosol);GO:0005856(cytoskeleton);GO:0005886(plasma membrane);GO:0005925(focal adhesion);GO:0007015(actin filament organization);GO:0007275(multicellular organism development);GO:0007399(nervous system development);GO:0007411(…	04360(Axon guidance);04810(Regulation of actin cytoskeleton)	K05746	NA	ENAH actin regulator [Source:MGI Symbol;Acc:MGI:108360]	protein_coding	R_MMU_376176(Signaling_by_ROBO_receptors);R_MMU_422475(Axon_guidance);R_MMU_9675108(Nervous_system_development);R_MMU_1266738(Developmental_Biology)	0.265996	0.302577	0.334208	0	4.7e-05	0	19208.1	14.2294	2.86913e-10	8.64603e-08	up	yes
71315	0	chr19	-	30098447	30175429	ENSMUST00000025778	25	3767	ENSMUSG00000024827	Gldc	GO:0003824(catalytic activity);GO:0004375(glycine dehydrogenase (decarboxylating) activity);GO:0005654(nucleoplasm);GO:0005739(mitochondrion);GO:0005886(plasma membrane);GO:0005960(glycine cleavage complex);GO:0006520(cellular amino acid metabolic process);GO:0006544(glycine metabolic process);GO:0006546(glycine catabolic process);GO:0016491(oxidoreductase activity);GO:0016594(glycine binding);GO…	00260(Glycine, serine and threonine metabolism);00630(Glyoxylate and dicarboxylate metabolism)	K00281	EC:1.4.4.2	glycine decarboxylase [Source:MGI Symbol;Acc:MGI:1341155]	protein_coding	R_MMU_1430728(Metabolism);R_MMU_71291(Metabolism_of_amino_acids_and_derivatives);R_MMU_389661(Glyoxylate_metabolism_and_glycine_degradation);R_MMU_6783984(Glycine_degradation)	4.03175	3.27531	3.9748	1.53792	1.63177	1.87725	2.23539	1.16052	2.9556e-10	8.87556e-08	up	yes
23084	0	chr11	-	6506548	6520958	ENSMUST00000003459	22	3307	ENSMUSG00000020437	Myo1g	GO:0000146(microfilament motor activity);GO:0000166(nucleotide binding);GO:0001891(phagocytic cup);GO:0002250(adaptive immune response);GO:0002376(immune system process);GO:0002456(T cell mediated immunity);GO:0003774(motor activity);GO:0003779(actin binding);GO:0005516(calmodulin binding);GO:0005524(ATP binding);GO:0005546(phosphatidylinositol-4,5-bisphosphate binding);GO:0005547(phosphatidylino…	NA	K10356	NA	myosin IG [Source:MGI Symbol;Acc:MGI:1927091]	protein_coding	NA	0.626616	0.744013	0.709254	1.67894	1.55828	1.98556	0.398232	-1.32832	2.96968e-10	8.88686e-08	down	yes
122851	0	chr7	-	86718977	86775943	ENSMUST00000001824	19	3125	ENSMUSG00000001773	Folh1	GO:0003824(catalytic activity);GO:0004180(carboxypeptidase activity);GO:0004181(metallocarboxypeptidase activity);GO:0005886(plasma membrane);GO:0005887(integral component of plasma membrane);GO:0006508(proteolysis);GO:0006760(folic acid-containing compound metabolic process);GO:0008152(metabolic process);GO:0008233(peptidase activity);GO:0008237(metallopeptidase activity);GO:0009986(cell surface…	00250(Alanine, aspartate and glutamate metabolism);04977(Vitamin digestion and absorption)	K14592	EC:3.4.17.21	folate hydrolase 1 [Source:MGI Symbol;Acc:MGI:1858193]	protein_coding	R_MMU_1430728(Metabolism);R_MMU_8963693(Aspartate_and_asparagine_metabolism);R_MMU_71291(Metabolism_of_amino_acids_and_derivatives)	4.56665	3.93264	4.8568	2.13285	2.34407	2.28252	1.97592	0.982523	3.05164e-10	9.10055e-08	up	no
16253	0	chr10	-	9622936	9675208	ENSMUST00000100070	2	6818	ENSMUSG00000060487	Samd5	GO:0005515(protein binding);GO:0005737(cytoplasm)	NA	NA	NA	sterile alpha motif domain containing 5 [Source:MGI Symbol;Acc:MGI:2444815]	protein_coding	NA	2.79315	2.61857	3.5369	1.40108	1.52742	1.30426	2.11413	1.08007	3.11256e-10	9.25022e-08	up	yes
4534	0	X	+	151835248	151935417	ENSMUST00000112622	81	14168	ENSMUSG00000025261	Huwe1	GO:0000139(Golgi membrane);GO:0000209(protein polyubiquitination);GO:0003677(DNA binding);GO:0004842(ubiquitin-protein transferase activity);GO:0005515(protein binding);GO:0005634(nucleus);GO:0005654(nucleoplasm);GO:0005737(cytoplasm);GO:0005829(cytosol);GO:0006281(DNA repair);GO:0006284(base-excision repair);GO:0006511(ubiquitin-dependent protein catabolic process);GO:0006513(protein monoubiquit…	04120(Ubiquitin mediated proteolysis)	K10592	EC:2.3.2.26	HECT, UBA and WWE domain containing 1 [Source:MGI Symbol;Acc:MGI:1926884]	protein_coding	R_MMU_168256(Immune_System);R_MMU_6798695(Neutrophil_degranulation);R_MMU_983168(Antigen_processing:_Ubiquitination_&_Proteasome_degradation);R_MMU_168249(Innate_Immune_System);R_MMU_1280218(Adaptive_Immune_System);R_MMU_983169(Class_I_MHC_mediated_antigen_processing_&_presentation)	0	0	0	0	0	0.716003	0.000418993	-11.2208	3.47996e-10	1.03065e-07	down	yes
61495	0	chr17	-	33996053	34000347	ENSMUST00000025181	8	1619	ENSMUSG00000061232	H2-K1	GO:0001916(positive regulation of T cell mediated cytotoxicity);GO:0002376(immune system process);GO:0002474(antigen processing and presentation of peptide antigen via MHC class I);GO:0002476(antigen processing and presentation of endogenous peptide antigen via MHC class Ib);GO:0002485(antigen processing and presentation of endogenous peptide antigen via MHC class I via ER pathway, TAP-dependent)…	04144(Endocytosis);04145(Phagosome);04218(Cellular senescence);04514(Cell adhesion molecules (CAMs));04612(Antigen processing and presentation);04650(Natural killer cell mediated cytotoxicity);04940(Type I diabetes mellitus);05163(Human cytomegalovirus infection);05165(Human papillomavirus infection);05166(Human T-cell leukemia virus 1 infection);05167(Kaposi sarcoma-associated herpesvirus infect…	K06751	NA	histocompatibility 2, K1, K region [Source:MGI Symbol;Acc:MGI:95904]	protein_coding	R_MMU_1236977(Endosomal/Vacuolar_pathway);R_MMU_1236975(Antigen_processing_Cross_presentation);R_MMU_1236974(ER_Phagosome_pathway);R_MMU_198933(Immunoregulatory_interactions_between_a_Lymphoid_and_a_non_Lymphoid_cell);R_MMU_168256(Immune_System);R_MMU_983170(Antigen_Presentation:_Folding,_assembly_and_peptide_loading_of_class_I_MHC);R_MMU_6798695(Neutrophil_degranulation);R_MMU_168249(Innate_Immu…	585.98	501.101	614.999	292.415	303.373	351.854	1.79612	0.844886	3.52466e-10	1.04032e-07	up	no
14914	0	chr1	-	173896345	173913046	ENSMUST00000009340	7	1785	ENSMUSG00000026536	Ifi211	GO:0000122(negative regulation of transcription by RNA polymerase II);GO:0000978(RNA polymerase II cis-regulatory region sequence-specific DNA binding);GO:0001227(DNA-binding transcription repressor activity, RNA polymerase II-specific);GO:0002218(activation of innate immune response);GO:0003690(double-stranded DNA binding);GO:0005634(nucleus);GO:0005654(nucleoplasm);GO:0005730(nucleolus);GO:0005…	NA	NA	NA	interferon activated gene 211 [Source:MGI Symbol;Acc:MGI:3041120]	protein_coding	R_MMU_168256(Immune_System);R_MMU_6798695(Neutrophil_degranulation);R_MMU_168249(Innate_Immune_System)	81.1353	89.9288	125.909	43.0887	38.0244	46.7662	2.32229	1.21555	3.58562e-10	1.05306e-07	up	yes
83753	0	chr2	-	181227615	181242027	ENSMUST00000108831	19	10109	ENSMUSG00000027580	Helz2	GO:0000166(nucleotide binding);GO:0000184(nuclear-transcribed mRNA catabolic process, nonsense-mediated decay);GO:0003677(DNA binding);GO:0003723(RNA binding);GO:0003724(RNA helicase activity);GO:0004386(helicase activity);GO:0004540(ribonuclease activity);GO:0005524(ATP binding);GO:0005634(nucleus);GO:0005654(nucleoplasm);GO:0005737(cytoplasm);GO:0016787(hydrolase activity);GO:0030374(nuclear re…	NA	NA	NA	helicase with zinc finger 2, transcriptional coactivator [Source:MGI Symbol;Acc:MGI:2385169]	protein_coding	R_MMU_9711123(Cellular_response_to_chemical_stress);R_MMU_556833(Metabolism_of_lipids);R_MMU_1430728(Metabolism);R_MMU_2262752(Cellular_responses_to_stress);R_MMU_8953897(Cellular_responses_to_external_stimuli);R_MMU_400206(Regulation_of_lipid_metabolism_by_PPARalpha);R_MMU_9707564(Cytoprotection_by_HMOX1)	14.6919	19.5177	18.5249	10.561	9.38052	10.3951	1.73831	0.797686	3.59228e-10	1.05306e-07	up	no
132141	0	chr8	+	88199214	88259722	ENSMUST00000118952	13	4597	ENSMUSG00000036779	Tent4b	GO:0003723(RNA binding);GO:0004652(polynucleotide adenylyltransferase activity);GO:0005730(nucleolus);GO:0005737(cytoplasm);GO:0006378(mRNA polyadenylation);GO:0010587(miRNA catabolic process);GO:0016779(nucleotidyltransferase activity);GO:0031499(TRAMP complex);GO:0032211(negative regulation of telomere maintenance via telomerase);GO:0033500(carbohydrate homeostasis);GO:0043629(ncRNA polyadenyla…	03018(RNA degradation)	K03514	EC:2.7.7.19	terminal nucleotidyltransferase 4B [Source:MGI Symbol;Acc:MGI:1917820]	protein_coding	NA	0	0	0	2.17898	0	0	0.000137679	-12.8264	3.9747e-10	1.16122e-07	down	yes
94723	0	chr4	+	115059508	115070469	ENSMUST00000162489	4	2894	ENSMUSG00000028717	Tal1	GO:0000118(histone deacetylase complex);GO:0000122(negative regulation of transcription by RNA polymerase II);GO:0000790(nuclear chromatin);GO:0000976(transcription regulatory region sequence-specific DNA binding);GO:0000977(RNA polymerase II regulatory region sequence-specific DNA binding);GO:0000978(RNA polymerase II cis-regulatory region sequence-specific DNA binding);GO:0000981(DNA-binding tr…	NA	NA	NA	T cell acute lymphocytic leukemia 1 [Source:MGI Symbol;Acc:MGI:98480]	protein_coding	R_MMU_73857(RNA_Polymerase_II_Transcription);R_MMU_212436(Generic_Transcription_Pathway);R_MMU_74160(Gene_expression_(Transcription));R_MMU_8878171(Transcriptional_regulation_by_RUNX1);R_MMU_8939236(RUNX1_regulates_transcription_of_genes_involved_in_differentiation_of_HSCs)	0	0.405822	0	0	0	0	1352.74	10.4017	4.03501e-10	1.17486e-07	up	yes
17041	0	chr10	+	29211695	29228424	ENSMUST00000213490	7	3309	ENSMUSG00000004360	9330159F19Rik	GO:0003674(molecular_function);GO:0005575(cellular_component);GO:0008150(biological_process)	NA	NA	NA	RIKEN cDNA 9330159F19 gene [Source:MGI Symbol;Acc:MGI:3036239]	nonsense_mediated_decay	NA	0	0	0	0.259544	0.149072	0.634546	0.000287587	-11.7637	4.06401e-10	1.17755e-07	down	yes
115913	0	chr7	+	5020570	5033138	ENSMUST00000085427	3	2751	ENSMUSG00000074405	Zfp865	GO:0003676(nucleic acid binding);GO:0003677(DNA binding);GO:0005634(nucleus);GO:0046872(metal ion binding)	NA	NA	NA	zinc finger protein 865 [Source:MGI Symbol;Acc:MGI:2442656]	protein_coding	NA	0.396566	0.153788	0.608472	0	0	0	3862.75	11.9154	4.07158e-10	1.17755e-07	up	yes
88791	0	chr3	-	107938847	107943749	ENSMUST00000106685	8	1153	ENSMUSG00000068762	Gstm6	GO:0004364(glutathione transferase activity);GO:0005515(protein binding);GO:0005737(cytoplasm);GO:0006749(glutathione metabolic process);GO:0016740(transferase activity)	00480(Glutathione metabolism);00980(Metabolism of xenobiotics by cytochrome P450);00982(Drug metabolism - cytochrome P450);00983(Drug metabolism - other enzymes);01524(Platinum drug resistance);05200(Pathways in cancer);05204(Chemical carcinogenesis);05225(Hepatocellular carcinoma);05418(Fluid shear stress and atherosclerosis)	K00799	EC:2.5.1.18	glutathione S-transferase, mu 6 [Source:MGI Symbol;Acc:MGI:1309467]	protein_coding	R_MMU_1430728(Metabolism);R_MMU_156590(Glutathione_conjugation);R_MMU_156580(Phase_II_Conjugation_of_compounds);R_MMU_211859(Biological_oxidations)	0	0	0	0.47076	0.630186	0.431236	0.000195799	-12.3183	4.12187e-10	1.18811e-07	down	yes
46530	0	chr14	-	59348732	59365444	ENSMUST00000160425	8	1281	ENSMUSG00000068245	Phf11d	GO:0003674(molecular_function);GO:0005634(nucleus);GO:0005654(nucleoplasm);GO:0008150(biological_process);GO:0031965(nuclear membrane);GO:0046872(metal ion binding)	NA	NA	NA	PHD finger protein 11D [Source:MGI Symbol;Acc:MGI:1277133]	protein_coding	NA	7.15438	10.283	19.7992	1.66053	1.1485	2.36979	7.19017	2.84603	4.23219e-10	1.21584e-07	up	yes
38453	0	chr13	+	37345208	37419036	ENSMUST00000021860	5	1134	ENSMUSG00000021423	Ly86	GO:0002376(immune system process);GO:0005515(protein binding);GO:0005576(extracellular region);GO:0005615(extracellular space);GO:0006954(inflammatory response);GO:0006955(immune response);GO:0031666(positive regulation of lipopolysaccharide-mediated signaling pathway);GO:0045087(innate immune response)	NA	NA	NA	lymphocyte antigen 86 [Source:MGI Symbol;Acc:MGI:1321404]	protein_coding	R_MMU_166016(Toll_Like_Receptor_4_(TLR4)_Cascade);R_MMU_168898(Toll_like_Receptor_Cascades);R_MMU_168256(Immune_System);R_MMU_168249(Innate_Immune_System)	0.805311	0.647169	0.730927	3.39677	2.38804	4.31009	0.216288	-2.20897	4.39249e-10	1.25377e-07	down	yes
27571	0	chr11	-	83295075	83298895	ENSMUST00000175741	4	2337	ENSMUSG00000018733	Pex12	GO:0004842(ubiquitin-protein transferase activity);GO:0005777(peroxisome);GO:0005778(peroxisomal membrane);GO:0005779(integral component of peroxisomal membrane);GO:0006513(protein monoubiquitination);GO:0006625(protein targeting to peroxisome);GO:0007031(peroxisome organization);GO:0008022(protein C-terminus binding);GO:0008270(zinc ion binding);GO:0015031(protein transport);GO:0016020(membrane)…	04146(Peroxisome)	K13345	NA	peroxisomal biogenesis factor 12 [Source:MGI Symbol;Acc:MGI:2144177]	protein_coding	R_MMU_9033241(Peroxisomal_protein_import);R_MMU_8852135(Protein_ubiquitination);R_MMU_9609507(Protein_localization);R_MMU_597592(Post_translational_protein_modification);R_MMU_392499(Metabolism_of_proteins);R_MMU_9603798(Class_I_peroxisomal_membrane_protein_import);R_MMU_8866654(E3_ubiquitin_ligases_ubiquitinate_target_proteins)	0	0	0.477791	0	0	0	1592.64	10.6372	4.39333e-10	1.25377e-07	up	yes
80146	0	chr2	+	121969082	122013591	ENSMUST00000110572	11	4160	ENSMUSG00000033411	Ctdspl2	GO:0000790(nuclear chromatin);GO:0004721(phosphoprotein phosphatase activity);GO:0005634(nucleus);GO:0005654(nucleoplasm);GO:0006470(protein dephosphorylation);GO:0008420(RNA polymerase II CTD heptapeptide repeat phosphatase activity);GO:0016787(hydrolase activity);GO:0016791(phosphatase activity);GO:0030514(negative regulation of BMP signaling pathway);GO:0046827(positive regulation of protein e…	NA	K17616	EC:3.1.3.-	CTD (carboxy-terminal domain, RNA polymerase II, polypeptide A) small phosphatase like 2 [Source:MGI Symbol;Acc:MGI:1196405]	protein_coding	NA	0	0.277266	0	0	0	0	924.22	9.85209	4.45889e-10	1.26828e-07	up	yes
32966	0	chr12	+	52504342	52568835	ENSMUST00000217820	6	2332	ENSMUSG00000035133	Arhgap5	GO:0003924(GTPase activity);GO:0005525(GTP binding);GO:0005783(endoplasmic reticulum);GO:0005829(cytosol);GO:0007165(signal transduction);GO:0030879(mammary gland development);GO:0042169(SH2 domain binding)	04510(Focal adhesion);04670(Leukocyte transendothelial migration)	K13709	NA	Rho GTPase activating protein 5 [Source:MGI Symbol;Acc:MGI:1332637]	protein_coding	R_MMU_8980692(RHOA_GTPase_cycle);R_MMU_9013405(RHOD_GTPase_cycle);R_MMU_9013423(RAC3_GTPase_cycle);R_MMU_9012999(RHO_GTPase_cycle);R_MMU_9696270(RND2_GTPase_cycle);R_MMU_9013409(RHOJ_GTPase_cycle);R_MMU_9696273(RND1_GTPase_cycle);R_MMU_9035034(RHOF_GTPase_cycle);R_MMU_9013106(RHOC_GTPase_cycle);R_MMU_9013026(RHOB_GTPase_cycle);R_MMU_9716542(Signaling_by_Rho_GTPases,_Miro_GTPases_and_RHOBTB3);R_MM…	0.480028	0	0	0	0	0	1600.09	10.6439	4.521e-10	1.28172e-07	up	yes
81832	0	chr2	+	154510536	154539356	ENSMUST00000137526	6	5074	ENSMUSG00000038533	Cbfa2t2	GO:0000122(negative regulation of transcription by RNA polymerase II);GO:0003714(transcription corepressor activity);GO:0005515(protein binding);GO:0005634(nucleus);GO:0006351(transcription, DNA-templated);GO:0006355(regulation of transcription, DNA-templated);GO:0010976(positive regulation of neuron projection development);GO:0010977(negative regulation of neuron projection development);GO:00308…	NA	K22751	NA	CBFA2/RUNX1 translocation partner 2 [Source:MGI Symbol;Acc:MGI:1333833]	protein_coding	NA	0	0	0.218022	0	0	0	726.74	9.5053	4.53803e-10	1.28233e-07	up	yes
137549	0	chr9	-	54544794	54560218	ENSMUST00000041901	6	1433	ENSMUSG00000037493	Cib2	GO:0000287(magnesium ion binding);GO:0001750(photoreceptor outer segment);GO:0001917(photoreceptor inner segment);GO:0005178(integrin binding);GO:0005509(calcium ion binding);GO:0005737(cytoplasm);GO:0005886(plasma membrane);GO:0005927(muscle tendon junction);GO:0007204(positive regulation of cytosolic calcium ion concentration);GO:0016020(membrane);GO:0031594(neuromuscular junction);GO:0032420(s…	NA	NA	NA	calcium and integrin binding family member 2 [Source:MGI Symbol;Acc:MGI:1929293]	protein_coding	NA	16.5623	16.0542	16.2742	22.2853	23.6525	23.4087	0.70502	-0.504265	4.65089e-10	1.30742e-07	down	no
2947	0	X	+	100730186	100738894	ENSMUST00000113744	16	2427	ENSMUSG00000019359	Gdpd2	GO:0005737(cytoplasm);GO:0005856(cytoskeleton);GO:0005884(actin filament);GO:0005886(plasma membrane);GO:0006629(lipid metabolic process);GO:0008081(phosphoric diester hydrolase activity);GO:0016020(membrane);GO:0016021(integral component of membrane);GO:0016787(hydrolase activity);GO:0030027(lamellipodium);GO:0045669(positive regulation of osteoblast differentiation);GO:0046872(metal ion binding…	NA	K01124	EC:3.1.4.43	glycerophosphodiester phosphodiesterase domain containing 2 [Source:MGI Symbol;Acc:MGI:1918834]	protein_coding	NA	0	0.472062	0	0	0	0	1573.54	10.6198	4.65718e-10	1.30742e-07	up	yes
82599	0	chr2	+	163820889	163833146	ENSMUST00000029188	5	1719	ENSMUSG00000027656	Ccn5	GO:0005515(protein binding);GO:0005520(insulin-like growth factor binding);GO:0005576(extracellular region);GO:0005615(extracellular space);GO:0005634(nucleus)	NA	K23089	NA	cellular communication network factor 5 [Source:MGI Symbol;Acc:MGI:1328326]	protein_coding	NA	60.4134	48.9297	63.2603	20.5338	18.74	28.7824	2.53619	1.34266	4.73568e-10	1.32514e-07	up	yes
52216	0	chr15	-	90933282	91049818	ENSMUST00000109287	33	5988	ENSMUSG00000022629	Kif21a	GO:0000166(nucleotide binding);GO:0003774(motor activity);GO:0003777(microtubule motor activity);GO:0005515(protein binding);GO:0005524(ATP binding);GO:0005737(cytoplasm);GO:0005829(cytosol);GO:0005856(cytoskeleton);GO:0005871(kinesin complex);GO:0005874(microtubule);GO:0005886(plasma membrane);GO:0007018(microtubule-based movement);GO:0008017(microtubule binding);GO:0016887(ATPase activity);GO:0…	NA	K10395	NA	kinesin family member 21A [Source:MGI Symbol;Acc:MGI:109188]	protein_coding	R_MMU_5653656(Vesicle_mediated_transport);R_MMU_109582(Hemostasis);R_MMU_6811434(COPI_dependent_Golgi_to_ER_retrograde_traffic);R_MMU_983231(Factors_involved_in_megakaryocyte_development_and_platelet_production);R_MMU_983189(Kinesins);R_MMU_168256(Immune_System);R_MMU_8856688(Golgi_to_ER_retrograde_transport);R_MMU_2132295(MHC_class_II_antigen_presentation);R_MMU_199991(Membrane_Trafficking);R_MM…	3.42096	0	0	0	0	0	11403.2	13.4771	4.79708e-10	1.33153e-07	up	yes
9707	0	chr1	+	60746358	60773359	ENSMUST00000027165	4	4347	ENSMUSG00000026012	Cd28	GO:0001772(immunological synapse);GO:0002020(protease binding);GO:0002376(immune system process);GO:0002863(positive regulation of inflammatory response to antigenic stimulus);GO:0005886(plasma membrane);GO:0006955(immune response);GO:0009897(external side of plasma membrane);GO:0009986(cell surface);GO:0010628(positive regulation of gene expression);GO:0010629(negative regulation of gene express…	04514(Cell adhesion molecules (CAMs));04660(T cell receptor signaling pathway);04672(Intestinal immune network for IgA production);04940(Type I diabetes mellitus);05162(Measles);05320(Autoimmune thyroid disease);05322(Systemic lupus erythematosus);05323(Rheumatoid arthritis);05330(Allograft rejection);05332(Graft-versus-host disease);05416(Viral myocarditis)	K06470	NA	CD28 antigen [Source:MGI Symbol;Acc:MGI:88327]	protein_coding	R_MMU_6811558(PI5P,_PP2A_and_IER3_Regulate_PI3K/AKT_Signaling);R_MMU_389356(CD28_co_stimulation);R_MMU_1257604(PIP3_activates_AKT_signaling);R_MMU_389357(CD28_dependent_PI3K/Akt_signaling);R_MMU_168256(Immune_System);R_MMU_389359(CD28_dependent_Vav1_pathway);R_MMU_162582(Signal_Transduction);R_MMU_1280218(Adaptive_Immune_System);R_MMU_9006925(Intracellular_signaling_by_second_messengers);R_MMU_19…	0.082219	0.093629	0.117612	0.436521	0.474215	0.344519	0.233785	-2.09674	4.80688e-10	1.33153e-07	down	yes
54292	0	chr16	-	17280351	17406314	ENSMUST00000036161	55	6431	ENSMUSG00000041720	Pi4ka	GO:0005737(cytoplasm);GO:0005886(plasma membrane);GO:0016301(kinase activity);GO:0016310(phosphorylation);GO:0016740(transferase activity);GO:0019034(viral replication complex);GO:0039694(viral RNA genome replication);GO:0044803(multi-organism membrane organization);GO:0046786(viral replication complex formation and maintenance);GO:0046854(phosphatidylinositol phosphorylation);GO:0048015(phosphat…	00562(Inositol phosphate metabolism);04070(Phosphatidylinositol signaling system)	K00888	EC:2.7.1.67	phosphatidylinositol 4-kinase alpha [Source:MGI Symbol;Acc:MGI:2448506]	protein_coding	R_MMU_1483255(PI_Metabolism);R_MMU_1483248(Synthesis_of_PIPs_at_the_ER_membrane);R_MMU_556833(Metabolism_of_lipids);R_MMU_1430728(Metabolism);R_MMU_1483257(Phospholipid_metabolism);R_MMU_1660514(Synthesis_of_PIPs_at_the_Golgi_membrane)	0	0	0.169813	0	0	0	566.043	9.14477	4.81792e-10	1.33153e-07	up	yes
43334	0	chr14	+	21499785	21672478	ENSMUST00000069648	17	7649	ENSMUSG00000021767	Kat6b	GO:0000123(histone acetyltransferase complex);GO:0000786(nucleosome);GO:0000790(nuclear chromatin);GO:0003677(DNA binding);GO:0004402(histone acetyltransferase activity);GO:0005634(nucleus);GO:0006325(chromatin organization);GO:0006334(nucleosome assembly);GO:0006355(regulation of transcription, DNA-templated);GO:0008134(transcription factor binding);GO:0010485(H4 histone acetyltransferase activi…	NA	K11306	EC:2.3.1.48	K(lysine) acetyltransferase 6B [Source:MGI Symbol;Acc:MGI:1858746]	protein_coding	R_MMU_3214847(HATs_acetylate_histones);R_MMU_3247509(Chromatin_modifying_enzymes);R_MMU_4839726(Chromatin_organization)	0	0	0	1.19819	0	0.001346	0.000250096	-11.9652	4.82031e-10	1.33153e-07	down	yes
25201	0	chr11	-	59963181	59964944	ENSMUST00000062405	2	1611	ENSMUSG00000049892	Rasd1	GO:0000166(nucleotide binding);GO:0003924(GTPase activity);GO:0005515(protein binding);GO:0005525(GTP binding);GO:0005634(nucleus);GO:0005737(cytoplasm);GO:0005886(plasma membrane);GO:0007165(signal transduction);GO:0007263(nitric oxide mediated signal transduction);GO:0016020(membrane);GO:0016529(sarcoplasmic reticulum);GO:0045892(negative regulation of transcription, DNA-templated);GO:0048471(p…	04713(Circadian entrainment);04934(Cushing syndrome)	K07843	NA	RAS, dexamethasone-induced 1 [Source:MGI Symbol;Acc:MGI:1270848]	protein_coding	NA	9.82104	10.4621	8.06909	16.7964	15.7773	15.7852	0.586288	-0.770319	4.84214e-10	1.33329e-07	down	no
59517	0	chr17	-	24897533	24936968	ENSMUST00000088345	32	5543	ENSMUSG00000024163	Mapk8ip3	GO:0000139(Golgi membrane);GO:0001701(in utero embryonic development);GO:0005078(MAP-kinase scaffold activity);GO:0005515(protein binding);GO:0005737(cytoplasm);GO:0005790(smooth endoplasmic reticulum);GO:0005794(Golgi apparatus);GO:0005886(plasma membrane);GO:0007254(JNK cascade);GO:0007257(activation of JUN kinase activity);GO:0007411(axon guidance);GO:0007585(respiratory gaseous exchange by re…	04010(MAPK signaling pathway)	K04436	NA	mitogen-activated protein kinase 8 interacting protein 3 [Source:MGI Symbol;Acc:MGI:1353598]	protein_coding	NA	0	2.83052	0	0	0	0	9435.06	13.2038	4.95752e-10	1.36071e-07	up	yes
139962	0	chr9	-	96823586	96889433	ENSMUST00000119141	7	2768	ENSMUSG00000043587	Pxylp1	GO:0000139(Golgi membrane);GO:0005794(Golgi apparatus);GO:0006024(glycosaminoglycan biosynthetic process);GO:0010909(positive regulation of heparan sulfate proteoglycan biosynthetic process);GO:0016020(membrane);GO:0016021(integral component of membrane);GO:0016311(dephosphorylation);GO:0016787(hydrolase activity);GO:0016791(phosphatase activity);GO:0050650(chondroitin sulfate proteoglycan biosyn…	NA	K21403	EC:3.1.3.-	2-phosphoxylose phosphatase 1 [Source:MGI Symbol;Acc:MGI:2442444]	protein_coding	NA	0.395181	0	0	0	0	0	1317.27	10.3633	4.98196e-10	1.36308e-07	up	yes
79682	0	chr2	+	119047150	119072919	ENSMUST00000028799	8	5527	ENSMUSG00000027326	Knl1	GO:0000775(chromosome, centromeric region);GO:0000776(kinetochore);GO:0000777(condensed chromosome kinetochore);GO:0001669(acrosomal vesicle);GO:0003674(molecular_function);GO:0005634(nucleus);GO:0005654(nucleoplasm);GO:0005694(chromosome);GO:0007049(cell cycle);GO:0007059(chromosome segregation);GO:0008608(attachment of spindle microtubules to kinetochore);GO:0010923(negative regulation of phosp…	NA	K11542	NA	kinetochore scaffold 1 [Source:MGI Symbol;Acc:MGI:1923714]	protein_coding	R_MMU_774815(Nucleosome_assembly);R_MMU_69620(Cell_Cycle_Checkpoints);R_MMU_9648025(EML4_and_NUDC_in_mitotic_spindle_formation);R_MMU_2467813(Separation_of_Sister_Chromatids);R_MMU_73886(Chromosome_Maintenance);R_MMU_1640170(Cell_Cycle);R_MMU_141444(Amplification__of_signal_from_unattached__kinetochores_via_a_MAD2__inhibitory_signal);R_MMU_5663220(RHO_GTPases_Activate_Formins);R_MMU_69278(Cell_Cy…	0	0	0	0.180404	0.073819	0.149545	0.000743001	-10.3943	5.04314e-10	1.37523e-07	down	yes
107626	0	chr6	-	3372257	3399572	ENSMUST00000120087	2	5330	ENSMUSG00000047735	Samd9l	GO:0005515(protein binding)	NA	NA	NA	sterile alpha motif domain containing 9-like [Source:MGI Symbol;Acc:MGI:1343184]	protein_coding	NA	30.2021	38.9595	48.2024	18.3677	14.5928	18.1138	2.29791	1.20032	5.05828e-10	1.37523e-07	up	yes
129121	0	chr8	-	24727186	24824066	ENSMUST00000050300	21	2560	ENSMUSG00000031554	Adam5	GO:0004222(metalloendopeptidase activity);GO:0005515(protein binding);GO:0006508(proteolysis);GO:0008237(metallopeptidase activity);GO:0016020(membrane);GO:0016021(integral component of membrane)	NA	NA	NA	a disintegrin and metallopeptidase domain 5 [Source:MGI Symbol;Acc:MGI:104730]	protein_coding	NA	0	0	0.419759	0	0	0	1399.2	10.4504	5.31997e-10	1.44183e-07	up	yes
94863	0	chr4	-	116306762	116463751	ENSMUST00000106484	30	5292	ENSMUSG00000003810	Mast2	GO:0000166(nucleotide binding);GO:0000287(magnesium ion binding);GO:0004672(protein kinase activity);GO:0004674(protein serine/threonine kinase activity);GO:0005515(protein binding);GO:0005524(ATP binding);GO:0006468(protein phosphorylation);GO:0016301(kinase activity);GO:0016310(phosphorylation);GO:0016740(transferase activity);GO:0019902(phosphatase binding);GO:0032655(regulation of interleukin…	NA	K08789	EC:2.7.11.1	microtubule associated serine/threonine kinase 2 [Source:MGI Symbol;Acc:MGI:894676]	protein_coding	NA	0	0	0	0	1.64998	0	0.000181821	-12.4252	5.48228e-10	1.48116e-07	down	yes
94284	0	chr4	+	107178726	107200506	ENSMUST00000154007	7	852	ENSMUSG00000028618	Tmem59	GO:0000137(Golgi cis cisterna);GO:0000138(Golgi trans cisterna);GO:0000139(Golgi membrane);GO:0004175(endopeptidase activity);GO:0005764(lysosome);GO:0005765(lysosomal membrane);GO:0005768(endosome);GO:0005770(late endosome);GO:0005794(Golgi apparatus);GO:0005797(Golgi medial cisterna);GO:0005886(plasma membrane);GO:0006508(proteolysis);GO:0006914(autophagy);GO:0010508(positive regulation of auto…	NA	NA	NA	transmembrane protein 59 [Source:MGI Symbol;Acc:MGI:1929278]	nonsense_mediated_decay	R_MMU_9012999(RHO_GTPase_cycle);R_MMU_9696273(RND1_GTPase_cycle);R_MMU_9716542(Signaling_by_Rho_GTPases,_Miro_GTPases_and_RHOBTB3);R_MMU_194315(Signaling_by_Rho_GTPases);R_MMU_162582(Signal_Transduction);R_MMU_9013407(RHOH_GTPase_cycle)	0	0	0	0	0	9.68659	3.09706e-05	-14.9787	5.50312e-10	1.48214e-07	down	yes
3529	0	X	+	114474604	114560508	ENSMUST00000133447	11	2893	ENSMUSG00000025597	Klhl4	GO:0003674(molecular_function);GO:0005515(protein binding);GO:0005575(cellular_component);GO:0008150(biological_process);GO:0015630(microtubule cytoskeleton);GO:0034451(centriolar satellite)	NA	K10442	NA	kelch-like 4 [Source:MGI Symbol;Acc:MGI:2442829]	protein_coding	NA	0.370816	0	0	0	0	0	1236.05	10.2715	5.5241e-10	1.48316e-07	up	yes
108049	0	chr6	+	17693947	17943022	ENSMUST00000115420	14	2094	ENSMUSG00000029534	St7	GO:0005515(protein binding);GO:0016020(membrane);GO:0016021(integral component of membrane)	NA	NA	NA	suppression of tumorigenicity 7 [Source:MGI Symbol;Acc:MGI:1927450]	protein_coding	NA	0	0	0.506455	0	0	0	1688.18	10.7213	5.6093e-10	1.50136e-07	up	yes
34135	0	chr12	+	81026828	81186410	ENSMUST00000129362	12	3385	ENSMUSG00000021136	Smoc1	GO:0001654(eye development);GO:0005509(calcium ion binding);GO:0005515(protein binding);GO:0005576(extracellular region);GO:0045667(regulation of osteoblast differentiation);GO:0050840(extracellular matrix binding);GO:0060173(limb development)	NA	NA	NA	SPARC related modular calcium binding 1 [Source:MGI Symbol;Acc:MGI:1929878]	protein_coding	NA	0.313783	0	0	0	0	0	1045.94	10.0306	5.84978e-10	1.55606e-07	up	yes
123922	0	chr7	-	102557922	102565445	ENSMUST00000106913	7	2682	ENSMUSG00000030966	Trim21	GO:0000209(protein polyubiquitination);GO:0004842(ubiquitin-protein transferase activity);GO:0005515(protein binding);GO:0005634(nucleus);GO:0005654(nucleoplasm);GO:0005737(cytoplasm);GO:0006513(protein monoubiquitination);GO:0008270(zinc ion binding);GO:0010508(positive regulation of autophagy);GO:0016567(protein ubiquitination);GO:0019005(SCF ubiquitin ligase complex);GO:0031648(protein destabi…	05322(Systemic lupus erythematosus)	NA	NA	tripartite motif-containing 21 [Source:MGI Symbol;Acc:MGI:106657]	protein_coding	R_MMU_3134975(Regulation_of_innate_immune_responses_to_cytosolic_DNA);R_MMU_168256(Immune_System);R_MMU_983168(Antigen_processing:_Ubiquitination_&_Proteasome_degradation);R_MMU_168249(Innate_Immune_System);R_MMU_1280218(Adaptive_Immune_System);R_MMU_1834949(Cytosolic_sensors_of_pathogen_associated_DNA);R_MMU_983169(Class_I_MHC_mediated_antigen_processing_&_presentation)	0.393815	0	0	0	0	0	1312.72	10.3583	5.84978e-10	1.55606e-07	up	yes
26890	0	chr11	+	75531698	75577575	ENSMUST00000042561	14	6891	ENSMUSG00000038178	Slc43a2	GO:0005886(plasma membrane);GO:0015175(neutral amino acid transmembrane transporter activity);GO:0015179(L-amino acid transmembrane transporter activity);GO:0015804(neutral amino acid transport);GO:0015807(L-amino acid transport);GO:0016020(membrane);GO:0016021(integral component of membrane);GO:0022857(transmembrane transporter activity);GO:0051956(negative regulation of amino acid transport);GO…	NA	K08229	NA	solute carrier family 43, member 2 [Source:MGI Symbol;Acc:MGI:2442746]	protein_coding	R_MMU_425393(Transport_of_inorganic_cations/anions_and_amino_acids/oligopeptides);R_MMU_425407(SLC_mediated_transmembrane_transport);R_MMU_382551(Transport_of_small_molecules);R_MMU_352230(Amino_acid_transport_across_the_plasma_membrane)	0	0	0	2.0107	0	0	0.000149202	-12.7104	6.12758e-10	1.62069e-07	down	yes
111449	0	chr6	+	83928855	83986623	ENSMUST00000203324	25	3822	ENSMUSG00000030016	Zfp638	GO:0003676(nucleic acid binding);GO:0003677(DNA binding);GO:0003723(RNA binding);GO:0005634(nucleus);GO:0005654(nucleoplasm);GO:0008270(zinc ion binding);GO:0008380(RNA splicing);GO:0016607(nuclear speck);GO:0043231(intracellular membrane-bounded organelle);GO:0046872(metal ion binding)	NA	NA	NA	zinc finger protein 638 [Source:MGI Symbol;Acc:MGI:1203484]	protein_coding	NA	0	0	0	0.163506	0.306189	0.118488	0.000510045	-10.9371	6.13034e-10	1.62069e-07	down	yes
60623	0	chr17	-	29332076	29347293	ENSMUST00000234507	12	1653	ENSMUSG00000024012	Mtch1	GO:0005739(mitochondrion);GO:0005743(mitochondrial inner membrane);GO:0006915(apoptotic process);GO:0006919(activation of cysteine-type endopeptidase activity involved in apoptotic process);GO:0016020(membrane);GO:0016021(integral component of membrane);GO:0043065(positive regulation of apoptotic process)	NA	K17885	NA	mitochondrial carrier 1 [Source:MGI Symbol;Acc:MGI:1929261]	protein_coding	NA	0	0	0	5.00034	0	0	5.9996e-05	-14.0248	6.14919e-10	1.6207e-07	down	yes
90244	0	chr3	+	142560052	142573202	ENSMUST00000106222	11	2629	ENSMUSG00000028268	Gbp3	GO:0000139(Golgi membrane);GO:0000166(nucleotide binding);GO:0003924(GTPase activity);GO:0005525(GTP binding);GO:0005634(nucleus);GO:0005737(cytoplasm);GO:0005794(Golgi apparatus);GO:0005829(cytosol);GO:0005886(plasma membrane);GO:0016020(membrane);GO:0016787(hydrolase activity);GO:0020005(symbiont-containing vacuole membrane);GO:0031410(cytoplasmic vesicle);GO:0035458(cellular response to interf…	04621(NOD-like receptor signaling pathway)	K20899	NA	guanylate binding protein 3 [Source:MGI Symbol;Acc:MGI:1926263]	protein_coding	NA	47.5479	56.3097	82.0521	13.7137	18.2974	24.4529	3.29253	1.7192	6.36086e-10	1.67137e-07	up	yes
49608	0	chr15	+	55307751	55520801	ENSMUST00000110217	48	6457	ENSMUSG00000022371	Col14a1	GO:0003229(ventricular cardiac muscle tissue development);GO:0005515(protein binding);GO:0005576(extracellular region);GO:0005581(collagen trimer);GO:0005614(interstitial matrix);GO:0005615(extracellular space);GO:0007155(cell adhesion);GO:0030020(extracellular matrix structural constituent conferring tensile strength);GO:0030199(collagen fibril organization);GO:0048873(homeostasis of number of c…	04974(Protein digestion and absorption)	K08133	NA	collagen, type XIV, alpha 1 [Source:MGI Symbol;Acc:MGI:1341272]	protein_coding	R_MMU_1650814(Collagen_biosynthesis_and_modifying_enzymes);R_MMU_2022090(Assembly_of_collagen_fibrils_and_other_multimeric_structures);R_MMU_8948216(Collagen_chain_trimerization);R_MMU_1474244(Extracellular_matrix_organization);R_MMU_1474290(Collagen_formation)	0	0	0	1.29379	0	0	0.000231877	-12.0744	6.59158e-10	1.72673e-07	down	yes
98551	0	chr4	-	156165290	156185901	ENSMUST00000105574	35	7193	ENSMUSG00000041936	Agrn	GO:0001932(regulation of protein phosphorylation);GO:0001934(positive regulation of protein phosphorylation);GO:0002162(dystroglycan binding);GO:0005201(extracellular matrix structural constituent);GO:0005509(calcium ion binding);GO:0005515(protein binding);GO:0005576(extracellular region);GO:0005604(basement membrane);GO:0005615(extracellular space);GO:0005796(Golgi lumen);GO:0005829(cytosol);GO…	04512(ECM-receptor interaction)	K06254	NA	agrin [Source:MGI Symbol;Acc:MGI:87961]	protein_coding	R_MMU_2024096(HS_GAG_degradation);R_MMU_1971475(A_tetrasaccharide_linker_sequence_is_required_for_GAG_synthesis);R_MMU_2022928(HS_GAG_biosynthesis);R_MMU_196854(Metabolism_of_vitamins_and_cofactors);R_MMU_71387(Metabolism_of_carbohydrates);R_MMU_1430728(Metabolism);R_MMU_1474244(Extracellular_matrix_organization);R_MMU_6806667(Metabolism_of_fat_soluble_vitamins);R_MMU_9709957(Sensory_Perception);…	0	1.91213	0	0	0	0	6373.76	12.6379	6.6968e-10	1.74898e-07	up	yes
128595	0	chr8	-	13077189	13105459	ENSMUST00000168164	11	2678	ENSMUSG00000038542	Pcid2	GO:0000973(posttranscriptional tethering of RNA polymerase II gene DNA at nuclear periphery);GO:0003690(double-stranded DNA binding);GO:0003723(RNA binding);GO:0005575(cellular_component);GO:0005634(nucleus);GO:0005737(cytoplasm);GO:0006368(transcription elongation from RNA polymerase II promoter);GO:0016973(poly(A)+ mRNA export from nucleus);GO:0043066(negative regulation of apoptotic process);G…	NA	NA	NA	PCI domain containing 2 [Source:MGI Symbol;Acc:MGI:2443003]	nonsense_mediated_decay	NA	0	0	4.91064	0	0	0	16368.8	13.9987	6.78185e-10	1.76584e-07	up	yes
46201	0	chr14	-	55636012	55643354	ENSMUST00000121791	6	2148	ENSMUSG00000002320	Tm9sf1	GO:0000421(autophagosome membrane);GO:0003674(molecular_function);GO:0005764(lysosome);GO:0005765(lysosomal membrane);GO:0006914(autophagy);GO:0016020(membrane);GO:0016021(integral component of membrane);GO:0031410(cytoplasmic vesicle);GO:0072657(protein localization to membrane)	NA	K17085	NA	transmembrane 9 superfamily member 1 [Source:MGI Symbol;Acc:MGI:1921390]	protein_coding	NA	0	0	0	0	0	3.39658	8.83241e-05	-13.4668	7.23252e-10	1.87751e-07	down	yes
45872	0	chr14	+	54431633	54445364	ENSMUST00000225641	10	3238	ENSMUSG00000000957	Mmp14	GO:0001501(skeletal system development);GO:0001503(ossification);GO:0001525(angiogenesis);GO:0001541(ovarian follicle development);GO:0001666(response to hypoxia);GO:0001935(endothelial cell proliferation);GO:0001958(endochondral ossification);GO:0004175(endopeptidase activity);GO:0004222(metalloendopeptidase activity);GO:0005178(integrin binding);GO:0005615(extracellular space);GO:0005634(nucleu…	04668(TNF signaling pathway);04912(GnRH signaling pathway);04928(Parathyroid hormone synthesis, secretion and action)	K07763	EC:3.4.24.80	matrix metallopeptidase 14 (membrane-inserted) [Source:MGI Symbol;Acc:MGI:101900]	protein_coding	R_MMU_1442490(Collagen_degradation);R_MMU_1474244(Extracellular_matrix_organization);R_MMU_1474228(Degradation_of_the_extracellular_matrix);R_MMU_1592389(Activation_of_Matrix_Metalloproteinases)	0.651641	0.79274	0.836135	0.157462	0.244375	0.156791	4.08235	2.0294	7.3325e-10	1.89775e-07	up	yes
96408	0	chr4	-	132781843	132796387	ENSMUST00000045154	6	3079	ENSMUSG00000037731	Themis2	GO:0002376(immune system process);GO:0005515(protein binding);GO:0005634(nucleus);GO:0005737(cytoplasm);GO:0006954(inflammatory response);GO:0050852(T cell receptor signaling pathway)	NA	NA	NA	thymocyte selection associated family member 2 [Source:MGI Symbol;Acc:MGI:2446213]	protein_coding	NA	1.6692	1.34013	1.63574	3.52971	3.05422	3.57982	0.457024	-1.12966	7.37568e-10	1.90321e-07	down	yes
132397	0	chr8	+	94037291	94067921	ENSMUST00000060632	13	5214	ENSMUSG00000033009	Ogfod1	GO:0005506(iron ion binding);GO:0005634(nucleus);GO:0005654(nucleoplasm);GO:0005737(cytoplasm);GO:0005829(cytosol);GO:0006449(regulation of translational termination);GO:0008283(cell population proliferation);GO:0010494(cytoplasmic stress granule);GO:0016491(oxidoreductase activity);GO:0016705(oxidoreductase activity, acting on paired donors, with incorporation or reduction of molecular oxygen);G…	NA	NA	NA	2-oxoglutarate and iron-dependent oxygenase domain containing 1 [Source:MGI Symbol;Acc:MGI:2442978]	protein_coding	NA	0	0	0	0	1.46249	0	0.000205129	-12.2512	7.40796e-10	1.90584e-07	down	yes
37	0	MT	-	15356	15422	ENSMUST00000082423	1	67	ENSMUSG00000064372	mt-Tp	NA	NA	NA	NA	mitochondrially encoded tRNA proline [Source:MGI Symbol;Acc:MGI:102478]	Mt_tRNA	NA	792.994	826.858	880.63	611.987	577.473	520.445	1.46235	0.54829	7.45016e-10	1.91099e-07	up	no
47383	0	chr14	+	75845900	75848297	ENSMUST00000134040	5	661	ENSMUSG00000060126	Tpt1	GO:0000922(spindle pole);GO:0005509(calcium ion binding);GO:0005515(protein binding);GO:0005615(extracellular space);GO:0005634(nucleus);GO:0005654(nucleoplasm);GO:0005737(cytoplasm);GO:0005771(multivesicular body);GO:0005829(cytosol);GO:0005881(cytoplasmic microtubule);GO:0007283(spermatogenesis);GO:0008134(transcription factor binding);GO:0019827(stem cell population maintenance);GO:1902230(neg…	NA	NA	NA	tumor protein, translationally-controlled 1 [Source:MGI Symbol;Acc:MGI:104890]	processed_transcript	NA	0	0	0	0	0	14.8329	2.02253e-05	-15.5935	7.50968e-10	1.92054e-07	down	yes
87564	0	chr3	+	94837713	94880332	ENSMUST00000107266	18	4100	ENSMUSG00000038902	Pogz	GO:0000790(nuclear chromatin);GO:0003676(nucleic acid binding);GO:0003677(DNA binding);GO:0005634(nucleus);GO:0005654(nucleoplasm);GO:0005694(chromosome);GO:0005737(cytoplasm);GO:0005829(cytosol);GO:0007049(cell cycle);GO:0007064(mitotic sister chromatid cohesion);GO:0010468(regulation of gene expression);GO:0046872(metal ion binding);GO:0051301(cell division);GO:0051382(kinetochore assembly)	NA	K22594	NA	pogo transposable element with ZNF domain [Source:MGI Symbol;Acc:MGI:2442117]	protein_coding	NA	0	0	0	3.35546	0	0	8.94065e-05	-13.4493	7.6858e-10	1.95977e-07	down	yes
47856	0	chr14	-	103113411	103346418	ENSMUST00000160758	83	14620	ENSMUSG00000033004	Mycbp2	GO:0005085(guanyl-nucleotide exchange factor activity);GO:0005515(protein binding);GO:0005634(nucleus);GO:0005654(nucleoplasm);GO:0005737(cytoplasm);GO:0005856(cytoskeleton);GO:0008045(motor neuron axon guidance);GO:0008270(zinc ion binding);GO:0008536(Ran GTPase binding);GO:0015630(microtubule cytoskeleton);GO:0016567(protein ubiquitination);GO:0016740(transferase activity);GO:0021785(branchiomo…	NA	K10693	EC:2.3.2.27	MYC binding protein 2, E3 ubiquitin protein ligase [Source:MGI Symbol;Acc:MGI:2179432]	protein_coding	NA	10.6493	11.4603	10.881	7.33455	6.85632	5.19126	1.70212	0.767329	7.90406e-10	2.00947e-07	up	no
16914	0	chr10	+	25408368	25523519	ENSMUST00000092645	20	4280	ENSMUSG00000019978	Epb41l2	GO:0003779(actin binding);GO:0005198(structural molecule activity);GO:0005515(protein binding);GO:0005654(nucleoplasm);GO:0005737(cytoplasm);GO:0005856(cytoskeleton);GO:0005886(plasma membrane);GO:0005938(cell cortex);GO:0007049(cell cycle);GO:0008092(cytoskeletal protein binding);GO:0008180(COP9 signalosome);GO:0008360(regulation of cell shape);GO:0015629(actin cytoskeleton);GO:0016020(membrane)…	NA	K06107	NA	erythrocyte membrane protein band 4.1 like 2 [Source:MGI Symbol;Acc:MGI:103009]	protein_coding	R_MMU_6794362(Protein_protein_interactions_at_synapses);R_MMU_6794361(Neurexins_and_neuroligins);R_MMU_112316(Neuronal_System)	0	0	0	2.3879	0	0	0.000125633	-12.9585	7.94393e-10	2.01367e-07	down	yes
57997	0	chr17	+	4996421	5347656	ENSMUST00000115799	19	9888	ENSMUSG00000069729	Arid1b	GO:0003677(DNA binding);GO:0005515(protein binding);GO:0005634(nucleus);GO:0005654(nucleoplasm);GO:0005737(cytoplasm);GO:0005829(cytosol);GO:0005886(plasma membrane);GO:0006325(chromatin organization);GO:0006338(chromatin remodeling);GO:0006357(regulation of transcription by RNA polymerase II);GO:0007270(neuron-neuron synaptic transmission);GO:0007399(nervous system development);GO:0016514(SWI/SN…	04714(Thermogenesis);05225(Hepatocellular carcinoma)	K11653	NA	AT rich interactive domain 1B (SWI-like) [Source:MGI Symbol;Acc:MGI:1926129]	protein_coding	R_MMU_73857(RNA_Polymerase_II_Transcription);R_MMU_212436(Generic_Transcription_Pathway);R_MMU_8939243(RUNX1_interacts_with_co_factors_whose_precise_effect_on_RUNX1_targets_is_not_known);R_MMU_3214858(RMTs_methylate_histone_arginines);R_MMU_74160(Gene_expression_(Transcription));R_MMU_8878171(Transcriptional_regulation_by_RUNX1);R_MMU_3247509(Chromatin_modifying_enzymes);R_MMU_4839726(Chromatin_o…	0	0	0	0	0.881113	0	0.000340478	-11.5201	8.11796e-10	2.05175e-07	down	yes
42864	0	chr14	-	13949118	13961212	ENSMUST00000224015	9	844	ENSMUSG00000053453	Thoc7	GO:0000346(transcription export complex);GO:0000347(THO complex);GO:0000445(THO complex part of transcription export complex);GO:0000784(nuclear chromosome, telomeric region);GO:0003723(RNA binding);GO:0005515(protein binding);GO:0005634(nucleus);GO:0005737(cytoplasm);GO:0005829(cytosol);GO:0006397(mRNA processing);GO:0006406(mRNA export from nucleus);GO:0008380(RNA splicing);GO:0016607(nuclear s…	03013(RNA transport)	K13176	NA	THO complex 7 [Source:MGI Symbol;Acc:MGI:1913481]	processed_transcript	R_MMU_72203(Processing_of_Capped_Intron_Containing_Pre_mRNA);R_MMU_72187(mRNA_3'_end_processing);R_MMU_73857(RNA_Polymerase_II_Transcription);R_MMU_73856(RNA_Polymerase_II_Transcription_Termination);R_MMU_8953854(Metabolism_of_RNA);R_MMU_159236(Transport_of_Mature_mRNA_derived_from_an_Intron_Containing_Transcript);R_MMU_74160(Gene_expression_(Transcription));R_MMU_72202(Transport_of_Mature_Transc…	0	0	0	3.61862	2.39755	0.311244	4.74127e-05	-14.3644	8.17683e-10	2.05521e-07	down	yes
67568	0	chr18	-	64452914	64489050	ENSMUST00000235766	11	6427	ENSMUSG00000024588	Fech	GO:0004325(ferrochelatase activity);GO:0005739(mitochondrion);GO:0005743(mitochondrial inner membrane);GO:0006779(porphyrin-containing compound biosynthetic process);GO:0006783(heme biosynthetic process);GO:0010038(response to metal ion);GO:0010288(response to lead ion);GO:0016829(lyase activity);GO:0017085(response to insecticide);GO:0042493(response to drug);GO:0045471(response to ethanol);GO:0…	00860(Porphyrin and chlorophyll metabolism)	K01772	4.99.1.9;EC:4.99.1.1	ferrochelatase [Source:MGI Symbol;Acc:MGI:95513]	protein_coding	R_MMU_189445(Metabolism_of_porphyrins);R_MMU_1430728(Metabolism);R_MMU_189451(Heme_biosynthesis)	0	1.95732	0	0	0	0	6524.4	12.6716	8.17933e-10	2.05521e-07	up	yes
137848	0	chr9	-	57750712	57765121	ENSMUST00000215109	11	4130	ENSMUSG00000032316	Clk3	GO:0000166(nucleotide binding);GO:0001669(acrosomal vesicle);GO:0004672(protein kinase activity);GO:0004674(protein serine/threonine kinase activity);GO:0004712(protein serine/threonine/tyrosine kinase activity);GO:0004713(protein tyrosine kinase activity);GO:0005524(ATP binding);GO:0005634(nucleus);GO:0005654(nucleoplasm);GO:0005737(cytoplasm);GO:0006468(protein phosphorylation);GO:0016301(kinas…	NA	K08823	EC:2.7.12.1	CDC-like kinase 3 [Source:MGI Symbol;Acc:MGI:1098670]	retained_intron	NA	0.780383	1.26921	1.08506	4.2416	2.54999	3.27982	0.311244	-1.68388	8.27012e-10	2.07198e-07	down	yes
14898	0	chr1	-	173723427	173741747	ENSMUST00000042610	8	3422	ENSMUSG00000073490	Ifi207	GO:0000122(negative regulation of transcription by RNA polymerase II);GO:0000978(RNA polymerase II cis-regulatory region sequence-specific DNA binding);GO:0001227(DNA-binding transcription repressor activity, RNA polymerase II-specific);GO:0002218(activation of innate immune response);GO:0003690(double-stranded DNA binding);GO:0005634(nucleus);GO:0005654(nucleoplasm);GO:0005730(nucleolus);GO:0005…	04621(NOD-like receptor signaling pathway)	K20914	NA	interferon activated gene 207 [Source:MGI Symbol;Acc:MGI:2138302]	protein_coding	NA	34.6102	38.8342	46.944	21.4069	16.3218	20.8182	2.05627	1.04003	8.2965e-10	2.07256e-07	up	yes
47827	0	chr14	+	101880841	101934195	ENSMUST00000159806	22	3845	ENSMUSG00000033060	Lmo7	GO:0005515(protein binding);GO:0005634(nucleus);GO:0005635(nuclear envelope);GO:0005654(nucleoplasm);GO:0005737(cytoplasm);GO:0005886(plasma membrane);GO:0005912(adherens junction);GO:0008022(protein C-terminus binding);GO:0009986(cell surface);GO:0016324(apical plasma membrane);GO:0023051(regulation of signaling);GO:0030155(regulation of cell adhesion);GO:0042805(actinin binding);GO:0045944(posi…	04520(Adherens junction)	K06084	NA	LIM domain only 7 [Source:MGI Symbol;Acc:MGI:1353586]	protein_coding	R_MMU_8951664(Neddylation);R_MMU_597592(Post_translational_protein_modification);R_MMU_392499(Metabolism_of_proteins);R_MMU_168256(Immune_System);R_MMU_983168(Antigen_processing:_Ubiquitination_&_Proteasome_degradation);R_MMU_1280218(Adaptive_Immune_System);R_MMU_983169(Class_I_MHC_mediated_antigen_processing_&_presentation)	0	0	0	0	0	1.7652	0.000169952	-12.5226	8.49662e-10	2.11642e-07	down	yes
24259	0	chr11	-	49057194	49064204	ENSMUST00000046745	2	2810	ENSMUSG00000078921	Tgtp2	GO:0000166(nucleotide binding);GO:0002376(immune system process);GO:0003924(GTPase activity);GO:0005525(GTP binding);GO:0005737(cytoplasm);GO:0005783(endoplasmic reticulum);GO:0005789(endoplasmic reticulum membrane);GO:0005794(Golgi apparatus);GO:0006952(defense response);GO:0006955(immune response);GO:0009615(response to virus);GO:0009617(response to bacterium);GO:0016020(membrane);GO:0016787(hy…	NA	NA	NA	T cell specific GTPase 2 [Source:MGI Symbol;Acc:MGI:3710083]	protein_coding	NA	13.9093	14.1232	27.6809	5.10902	3.28012	5.20381	4.0987	2.03517	8.64774e-10	2.14786e-07	up	yes
48603	0	chr15	-	11839896	11905639	ENSMUST00000066529	8	6892	ENSMUSG00000022206	Npr3	GO:0001501(skeletal system development);GO:0002158(osteoclast proliferation);GO:0007193(adenylate cyclase-inhibiting G protein-coupled receptor signaling pathway);GO:0007194(negative regulation of adenylate cyclase activity);GO:0007200(phospholipase C-activating G protein-coupled receptor signaling pathway);GO:0008217(regulation of blood pressure);GO:0008528(G protein-coupled peptide receptor act…	NA	K12325	NA	natriuretic peptide receptor 3 [Source:MGI Symbol;Acc:MGI:97373]	protein_coding	NA	4.20392	4.90315	4.68799	3.18799	3.24501	2.8572	1.48491	0.570371	8.84576e-10	2.19072e-07	up	no
7793	0	chr1	-	13139159	13374083	ENSMUST00000068304	22	8006	ENSMUSG00000005886	Ncoa2	GO:0000122(negative regulation of transcription by RNA polymerase II);GO:0000978(RNA polymerase II cis-regulatory region sequence-specific DNA binding);GO:0001162(RNA polymerase II intronic transcription regulatory region sequence-specific DNA binding);GO:0003682(chromatin binding);GO:0003713(transcription coactivator activity);GO:0005102(signaling receptor binding);GO:0005515(protein binding);GO…	04915(Estrogen signaling pathway);04919(Thyroid hormone signaling pathway)	K11255	NA	nuclear receptor coactivator 2 [Source:MGI Symbol;Acc:MGI:1276533]	protein_coding	R_MMU_211897(Cytochrome_P450_arranged_by_substrate_type);R_MMU_9711123(Cellular_response_to_chemical_stress);R_MMU_556833(Metabolism_of_lipids);R_MMU_1430728(Metabolism);R_MMU_193368(Synthesis_of_bile_acids_and_bile_salts_via_7alpha_hydroxycholesterol);R_MMU_2262752(Cellular_responses_to_stress);R_MMU_211976(Endogenous_sterols);R_MMU_9018519(Estrogen_dependent_gene_expression);R_MMU_211945(Phase_…	4.16887	3.39936	4.05856	2.10899	2.35169	2.02156	1.79364	0.842888	8.95719e-10	2.21196e-07	up	no
104125	0	chr5	+	114380826	114421168	ENSMUST00000130169	27	4888	ENSMUSG00000029577	Ube3b	GO:0000209(protein polyubiquitination);GO:0004842(ubiquitin-protein transferase activity);GO:0005515(protein binding);GO:0006511(ubiquitin-dependent protein catabolic process);GO:0016567(protein ubiquitination);GO:0016740(transferase activity);GO:0061631(ubiquitin conjugating enzyme activity)	04120(Ubiquitin mediated proteolysis)	K10588	EC:2.3.2.26	ubiquitin protein ligase E3B [Source:MGI Symbol;Acc:MGI:1891295]	nonsense_mediated_decay	R_MMU_168256(Immune_System);R_MMU_983168(Antigen_processing:_Ubiquitination_&_Proteasome_degradation);R_MMU_1280218(Adaptive_Immune_System);R_MMU_983169(Class_I_MHC_mediated_antigen_processing_&_presentation)	0	0	0	1.41197	0	0	0.000212469	-12.2005	9.07592e-10	2.23488e-07	down	yes
25858	0	chr11	+	69100158	69109948	ENSMUST00000166748	23	4636	ENSMUSG00000020893	Per1	GO:0000122(negative regulation of transcription by RNA polymerase II);GO:0000976(transcription regulatory region sequence-specific DNA binding);GO:0000978(RNA polymerase II cis-regulatory region sequence-specific DNA binding);GO:0001222(transcription corepressor binding);GO:0002028(regulation of sodium ion transport);GO:0005515(protein binding);GO:0005634(nucleus);GO:0005654(nucleoplasm);GO:00057…	04710(Circadian rhythm);04713(Circadian entrainment)	K21944	NA	period circadian clock 1 [Source:MGI Symbol;Acc:MGI:1098283]	protein_coding	NA	0	0	0	1.47398	0	0	0.000203531	-12.2625	9.31534e-10	2.2873e-07	down	yes
66598	0	chr18	-	38196694	38209762	ENSMUST00000057185	3	3902	ENSMUSG00000051375	Pcdh1	GO:0005509(calcium ion binding);GO:0005515(protein binding);GO:0005654(nucleoplasm);GO:0005730(nucleolus);GO:0005886(plasma membrane);GO:0005887(integral component of plasma membrane);GO:0005911(cell-cell junction);GO:0007155(cell adhesion);GO:0007156(homophilic cell adhesion via plasma membrane adhesion molecules);GO:0016020(membrane);GO:0016021(integral component of membrane);GO:0016339(calcium…	NA	K16498	NA	protocadherin 1 [Source:MGI Symbol;Acc:MGI:104692]	protein_coding	NA	0	0	0	0	1.75121	0	0.00017131	-12.5111	9.38456e-10	2.29775e-07	down	yes
104214	0	chr5	+	114923264	114937915	ENSMUST00000112143	6	2181	ENSMUSG00000041827	Oasl1	GO:0002376(immune system process);GO:0003677(DNA binding);GO:0003723(RNA binding);GO:0003725(double-stranded RNA binding);GO:0005515(protein binding);GO:0005524(ATP binding);GO:0005634(nucleus);GO:0005654(nucleoplasm);GO:0005730(nucleolus);GO:0005737(cytoplasm);GO:0005829(cytosol);GO:0006955(immune response);GO:0009615(response to virus);GO:0016020(membrane);GO:0016740(transferase activity);GO:00…	05165(Human papillomavirus infection)	K14608	NA	2'-5' oligoadenylate synthetase-like 1 [Source:MGI Symbol;Acc:MGI:2180849]	protein_coding	R_MMU_8983711(OAS_antiviral_response);R_MMU_168256(Immune_System);R_MMU_1280215(Cytokine_Signaling_in_Immune_system);R_MMU_913531(Interferon_Signaling);R_MMU_1169410(Antiviral_mechanism_by_IFN_stimulated_genes)	26.4807	25.9863	44.766	8.35887	7.95998	12.286	3.39918	1.76519	9.58081e-10	2.33916e-07	up	yes
125660	0	chr7	-	123279385	123369885	ENSMUST00000205262	20	3036	ENSMUSG00000030766	Arhgap17	GO:0005096(GTPase activator activity);GO:0005515(protein binding);GO:0005654(nucleoplasm);GO:0005737(cytoplasm);GO:0005829(cytosol);GO:0005886(plasma membrane);GO:0005923(bicellular tight junction);GO:0007015(actin filament organization);GO:0007165(signal transduction);GO:0016020(membrane);GO:0017124(SH3 domain binding);GO:0017156(calcium-ion regulated exocytosis);GO:0030054(cell junction);GO:003…	04530(Tight junction)	K20638	NA	Rho GTPase activating protein 17 [Source:MGI Symbol;Acc:MGI:1917747]	protein_coding	R_MMU_9013405(RHOD_GTPase_cycle);R_MMU_9013423(RAC3_GTPase_cycle);R_MMU_9012999(RHO_GTPase_cycle);R_MMU_9013404(RAC2_GTPase_cycle);R_MMU_9716542(Signaling_by_Rho_GTPases,_Miro_GTPases_and_RHOBTB3);R_MMU_9013148(CDC42_GTPase_cycle);R_MMU_194315(Signaling_by_Rho_GTPases);R_MMU_162582(Signal_Transduction);R_MMU_9013149(RAC1_GTPase_cycle);R_MMU_9013406(RHOQ_GTPase_cycle)	0.71551	5.25251	0.109182	0	0	0	20257.4	14.3062	9.6667e-10	2.35346e-07	up	yes
57688	0	chr16	+	94370792	94469343	ENSMUST00000231569	36	6373	ENSMUSG00000040785	Ttc3	GO:0004842(ubiquitin-protein transferase activity);GO:0005515(protein binding);GO:0005634(nucleus);GO:0005654(nucleoplasm);GO:0005730(nucleolus);GO:0005829(cytosol);GO:0006511(ubiquitin-dependent protein catabolic process);GO:0016020(membrane);GO:0016021(integral component of membrane);GO:0046872(metal ion binding);GO:0070936(protein K48-linked ubiquitination)	NA	K15712	EC:2.3.2.27	tetratricopeptide repeat domain 3 [Source:MGI Symbol;Acc:MGI:1276539]	protein_coding	NA	0	1.79091	0	0	0	0	5969.7	12.5434	1.01463e-09	2.46326e-07	up	yes
60337	0	chr17	+	28328591	28330658	ENSMUST00000233842	5	423	ENSMUSG00000037805	Rpl10a	GO:0003723(RNA binding);GO:0003735(structural constituent of ribosome);GO:0005840(ribosome);GO:0006412(translation);GO:0015934(large ribosomal subunit);GO:0022625(cytosolic large ribosomal subunit);GO:0045471(response to ethanol)	03010(Ribosome)	K02865	NA	ribosomal protein L10A [Source:MGI Symbol;Acc:MGI:1343877]	processed_transcript	NA	0	0	0	0	15.445	0	1.94238e-05	-15.6518	1.02811e-09	2.48898e-07	down	yes
95137	0	chr4	-	118137006	118179978	ENSMUST00000106403	22	4536	ENSMUSG00000033326	Kdm4a	GO:0005634(nucleus);GO:0005721(pericentric heterochromatin);GO:0005737(cytoplasm);GO:0006325(chromatin organization);GO:0006338(chromatin remodeling);GO:0008270(zinc ion binding);GO:0010507(negative regulation of autophagy);GO:0010628(positive regulation of gene expression);GO:0010629(negative regulation of gene expression);GO:0014898(cardiac muscle hypertrophy in response to stress);GO:0016491(o…	NA	K06709	EC:1.14.11.-	lysine (K)-specific demethylase 4A [Source:MGI Symbol;Acc:MGI:2446210]	protein_coding	R_MMU_3214842(HDMs_demethylate_histones);R_MMU_5693565(Recruitment_and_ATM_mediated_phosphorylation_of_repair_and_signaling_proteins_at_DNA_double_strand_breaks);R_MMU_5693532(DNA_Double_Strand_Break_Repair);R_MMU_5693606(DNA_Double_Strand_Break_Response);R_MMU_3247509(Chromatin_modifying_enzymes);R_MMU_4839726(Chromatin_organization);R_MMU_73894(DNA_Repair)	0	0	2.38793	0	0	0	7959.78	12.9585	1.05596e-09	2.54924e-07	up	yes
29089	0	chr11	-	100888681	100939479	ENSMUST00000138438	24	2506	ENSMUSG00000004040	Stat3	GO:0000790(nuclear chromatin);GO:0000976(transcription regulatory region sequence-specific DNA binding);GO:0000978(RNA polymerase II cis-regulatory region sequence-specific DNA binding);GO:0000981(DNA-binding transcription factor activity, RNA polymerase II-specific);GO:0001103(RNA polymerase II repressing transcription factor binding);GO:0001228(DNA-binding transcription activator activity, RNA …	01521(EGFR tyrosine kinase inhibitor resistance);04062(Chemokine signaling pathway);04066(HIF-1 signaling pathway);04068(FoxO signaling pathway);04217(Necroptosis);04550(Signaling pathways regulating pluripotency of stem cells);04630(Jak-STAT signaling pathway);04659(Th17 cell differentiation);04917(Prolactin signaling pathway);04920(Adipocytokine signaling pathway);04931(Insulin resistance);0493…	K04692	NA	signal transducer and activator of transcription 3 [Source:MGI Symbol;Acc:MGI:103038]	protein_coding	R_MMU_9020958(Interleukin_21_signaling);R_MMU_446652(Interleukin_1_family_signaling);R_MMU_8875791(MET_activates_STAT3);R_MMU_447115(Interleukin_12_family_signaling);R_MMU_6785807(Interleukin_4_and_Interleukin_13_signaling);R_MMU_449147(Signaling_by_Interleukins);R_MMU_451927(Interleukin_2_family_signaling);R_MMU_186763(Downstream_signal_transduction);R_MMU_8983432(Interleukin_15_signaling);R_MMU…	0	4.44162	0	0	0	0	14805.4	13.8538	1.07566e-09	2.58955e-07	up	yes
43811	0	chr14	+	30559690	30573624	ENSMUST00000223633	11	2438	ENSMUSG00000021957	Tkt	GO:0000287(magnesium ion binding);GO:0003824(catalytic activity);GO:0004802(transketolase activity);GO:0005509(calcium ion binding);GO:0005654(nucleoplasm);GO:0005777(peroxisome);GO:0005789(endoplasmic reticulum membrane);GO:0006098(pentose-phosphate shunt);GO:0009052(pentose-phosphate shunt, non-oxidative branch);GO:0016604(nuclear body);GO:0016607(nuclear speck);GO:0016740(transferase activity)…	00030(Pentose phosphate pathway)	NA	NA	transketolase [Source:MGI Symbol;Acc:MGI:105992]	retained_intron	R_MMU_163685(Integration_of_energy_metabolism);R_MMU_71387(Metabolism_of_carbohydrates);R_MMU_1430728(Metabolism);R_MMU_163754(Insulin_effects_increased_synthesis_of_Xylulose_5_Phosphate);R_MMU_71336(Pentose_phosphate_pathway)	9.32381	13.3015	10.7398	24.4254	19.987	19.718	0.52027	-0.942668	1.08213e-09	2.59786e-07	down	no
41804	0	chr13	-	103818791	103889292	ENSMUST00000053927	25	6103	ENSMUSG00000021709	Erbin	GO:0005102(signaling receptor binding);GO:0005176(ErbB-2 class receptor binding);GO:0005515(protein binding);GO:0005634(nucleus);GO:0005737(cytoplasm);GO:0005886(plasma membrane);GO:0006605(protein targeting);GO:0007165(signal transduction);GO:0016020(membrane);GO:0016323(basolateral plasma membrane);GO:0016607(nuclear speck);GO:0030054(cell junction);GO:0030056(hemidesmosome);GO:0031594(neuromus…	04621(NOD-like receptor signaling pathway)	K12796	NA	Erbb2 interacting protein [Source:MGI Symbol;Acc:MGI:1890169]	protein_coding	R_MMU_8980692(RHOA_GTPase_cycle);R_MMU_9013423(RAC3_GTPase_cycle);R_MMU_9652282(Drug_mediated_inhibition_of_ERBB2_signaling);R_MMU_9012999(RHO_GTPase_cycle);R_MMU_9013404(RAC2_GTPase_cycle);R_MMU_9013106(RHOC_GTPase_cycle);R_MMU_9013026(RHOB_GTPase_cycle);R_MMU_9716542(Signaling_by_Rho_GTPases,_Miro_GTPases_and_RHOBTB3);R_MMU_194315(Signaling_by_Rho_GTPases);R_MMU_9006934(Signaling_by_Receptor_Ty…	0	0	1.94131	0	0	0	6471.05	12.6598	1.09439e-09	2.62001e-07	up	yes
17820	0	chr10	+	51495216	51496601	ENSMUST00000218753	2	1279	ENSMUSG00000112148	Lilrb4a	GO:0001780(neutrophil homeostasis);GO:0002250(adaptive immune response);GO:0002376(immune system process);GO:0002437(inflammatory response to antigenic stimulus);GO:0005886(plasma membrane);GO:0006954(inflammatory response);GO:0007596(blood coagulation);GO:0009611(response to wounding);GO:0009624(response to nematode);GO:0009897(external side of plasma membrane);GO:0009991(response to extracellul…	04380(Osteoclast differentiation)	K06512	NA	leukocyte immunoglobulin-like receptor, subfamily B, member 4A [Source:MGI Symbol;Acc:MGI:102701]	retained_intron	R_MMU_168256(Immune_System);R_MMU_6798695(Neutrophil_degranulation);R_MMU_168249(Innate_Immune_System)	2.34674	3.03606	2.27348	8.58658	6.00739	5.97385	0.372245	-1.42567	1.14335e-09	2.72963e-07	down	yes
39147	0	chr13	+	51846678	51848468	ENSMUST00000021903	4	1071	ENSMUSG00000021453	Gadd45g	GO:0000185(activation of MAPKKK activity);GO:0005634(nucleus);GO:0005737(cytoplasm);GO:0043065(positive regulation of apoptotic process);GO:0046330(positive regulation of JNK cascade);GO:0051726(regulation of cell cycle);GO:1900745(positive regulation of p38MAPK cascade)	04010(MAPK signaling pathway);04068(FoxO signaling pathway);04110(Cell cycle);04115(p53 signaling pathway);04210(Apoptosis);04218(Cellular senescence);05169(Epstein-Barr virus infection);05200(Pathways in cancer);05202(Transcriptional misregulation in cancer);05210(Colorectal cancer);05212(Pancreatic cancer);05213(Endometrial cancer);05214(Glioma);05216(Thyroid cancer);05217(Basal cell carcinoma)…	K04402	NA	growth arrest and DNA-damage-inducible 45 gamma [Source:MGI Symbol;Acc:MGI:1346325]	protein_coding	NA	37.4155	40.3351	43.2452	28.2617	28.4232	26.6278	1.45231	0.538348	1.20723e-09	2.87417e-07	up	no
115374	0	chr6	-	148232430	148444389	ENSMUST00000100772	19	8269	ENSMUSG00000030306	Tmtc1	GO:0000030(mannosyltransferase activity);GO:0004169(dolichyl-phosphate-mannose-protein mannosyltransferase activity);GO:0005515(protein binding);GO:0005739(mitochondrion);GO:0005783(endoplasmic reticulum);GO:0006396(RNA processing);GO:0006486(protein glycosylation);GO:0016020(membrane);GO:0016021(integral component of membrane);GO:0016740(transferase activity);GO:0035269(protein O-linked mannosyl…	NA	NA	NA	transmembrane and tetratricopeptide repeat containing 1 [Source:MGI Symbol;Acc:MGI:3039590]	protein_coding	NA	0	0	0	0.729411	0	0	0.000411291	-11.2476	1.21406e-09	2.88248e-07	down	yes
47341	0	chr14	+	75136332	75230842	ENSMUST00000145303	17	3841	ENSMUSG00000021998	Lcp1	GO:0001725(stress fiber);GO:0001726(ruffle);GO:0001891(phagocytic cup);GO:0002102(podosome);GO:0002286(T cell activation involved in immune response);GO:0003779(actin binding);GO:0005178(integrin binding);GO:0005509(calcium ion binding);GO:0005515(protein binding);GO:0005737(cytoplasm);GO:0005829(cytosol);GO:0005856(cytoskeleton);GO:0005884(actin filament);GO:0005886(plasma membrane);GO:0005925(f…	NA	K17276	NA	lymphocyte cytosolic protein 1 [Source:MGI Symbol;Acc:MGI:104808]	protein_coding	NA	12.0322	12.16	7.23872	24.2058	23.8165	27.3318	0.417109	-1.2615	1.22272e-09	2.89505e-07	down	yes
3902	0	X	+	135742733	135803474	ENSMUST00000113147	10	5611	ENSMUSG00000043384	Gprasp1	GO:0005515(protein binding);GO:0005634(nucleus);GO:0005737(cytoplasm);GO:0005829(cytosol);GO:0008333(endosome to lysosome transport);GO:1990172(G protein-coupled receptor catabolic process)	NA	NA	NA	G protein-coupled receptor associated sorting protein 1 [Source:MGI Symbol;Acc:MGI:1917418]	protein_coding	NA	0	0	0	1.05909	0	0	0.000283261	-11.7856	1.26005e-09	2.97528e-07	down	yes
103289	0	chr5	-	105270702	105293684	ENSMUST00000200045	10	4173	ENSMUSG00000104713	Gbp6	GO:0003924(GTPase activity);GO:0005525(GTP binding);GO:0009617(response to bacterium);GO:0020005(symbiont-containing vacuole membrane);GO:0031410(cytoplasmic vesicle);GO:0035458(cellular response to interferon-beta);GO:0042832(defense response to protozoan);GO:0044406(adhesion of symbiont to host);GO:0050830(defense response to Gram-positive bacterium);GO:0071222(cellular response to lipopolysacc…	NA	K20908	NA	guanylate binding protein 6 [Source:MGI Symbol;Acc:MGI:2140937]	nonsense_mediated_decay	NA	13.9888	18.05	26.8764	7.18691	5.72118	7.28389	2.91775	1.54486	1.29707e-09	3.05432e-07	up	yes
53757	0	chr16	-	8689595	8792308	ENSMUST00000160405	32	4745	ENSMUSG00000022710	Usp7	GO:0002039(p53 binding);GO:0004197(cysteine-type endopeptidase activity);GO:0004843(thiol-dependent ubiquitin-specific protease activity);GO:0005515(protein binding);GO:0005634(nucleus);GO:0005829(cytosol);GO:0006111(regulation of gluconeogenesis);GO:0006283(transcription-coupled nucleotide-excision repair);GO:0006508(proteolysis);GO:0006511(ubiquitin-dependent protein catabolic process);GO:00080…	04068(FoxO signaling pathway);05169(Epstein-Barr virus infection);05203(Viral carcinogenesis)	K11838	EC:3.4.19.12	ubiquitin specific peptidase 7 [Source:MGI Symbol;Acc:MGI:2182061]	protein_coding	R_MMU_6782135(Dual_incision_in_TC_NER);R_MMU_5689880(Ub_specific_processing_proteases);R_MMU_8852135(Protein_ubiquitination);R_MMU_6782210(Gap_filling_DNA_repair_synthesis_and_ligation_in_TC_NER);R_MMU_73857(RNA_Polymerase_II_Transcription);R_MMU_6781823(Formation_of_TC_NER_Pre_Incision_Complex);R_MMU_212436(Generic_Transcription_Pathway);R_MMU_5696398(Nucleotide_Excision_Repair);R_MMU_1257604(PI…	2.0576	0	0	0	0	0	6858.67	12.7437	1.32389e-09	3.10898e-07	up	yes
3394	0	X	-	107397099	107403376	ENSMUST00000033591	6	1744	ENSMUSG00000031239	Itm2a	GO:0001540(amyloid-beta binding);GO:0002317(plasma cell differentiation);GO:0002377(immunoglobulin production);GO:0005794(Golgi apparatus);GO:0005886(plasma membrane);GO:0016020(membrane);GO:0016021(integral component of membrane);GO:0042985(negative regulation of amyloid precursor protein biosynthetic process)	NA	K18241	NA	integral membrane protein 2A [Source:MGI Symbol;Acc:MGI:107706]	protein_coding	NA	23.9692	22.796	24.0498	16.3715	15.835	16.6671	1.44894	0.534999	1.36456e-09	3.19579e-07	up	no
27607	0	chr11	-	83572919	83578636	ENSMUST00000019266	4	3006	ENSMUSG00000019122	Ccl9	GO:0002548(monocyte chemotaxis);GO:0005125(cytokine activity);GO:0005576(extracellular region);GO:0005615(extracellular space);GO:0006935(chemotaxis);GO:0006954(inflammatory response);GO:0006955(immune response);GO:0007165(signal transduction);GO:0007186(G protein-coupled receptor signaling pathway);GO:0008009(chemokine activity);GO:0030593(neutrophil chemotaxis);GO:0043547(positive regulation of…	04060(Cytokine-cytokine receptor interaction);04062(Chemokine signaling pathway)	K22671	NA	chemokine (C-C motif) ligand 9 [Source:MGI Symbol;Acc:MGI:104533]	protein_coding	R_MMU_373076(Class_A/1_(Rhodopsin_like_receptors));R_MMU_375276(Peptide_ligand_binding_receptors);R_MMU_500792(GPCR_ligand_binding);R_MMU_444473(Formyl_peptide_receptors_bind_formyl_peptides_and_many_other_ligands);R_MMU_416476(G_alpha_(q)_signalling_events);R_MMU_372790(Signaling_by_GPCR);R_MMU_388396(GPCR_downstream_signalling);R_MMU_162582(Signal_Transduction);R_MMU_418594(G_alpha_(i)_signalli…	6.341	6.07709	5.1676	10.2097	10.9628	13.0933	0.513213	-0.96237	1.46746e-09	3.42745e-07	down	no
104654	0	chr5	-	120730333	120749853	ENSMUST00000053909	11	3869	ENSMUSG00000032690	Oas2	GO:0000166(nucleotide binding);GO:0001730(2'-5'-oligoadenylate synthetase activity);GO:0002376(immune system process);GO:0003723(RNA binding);GO:0003725(double-stranded RNA binding);GO:0005524(ATP binding);GO:0005634(nucleus);GO:0005654(nucleoplasm);GO:0005737(cytoplasm);GO:0005829(cytosol);GO:0006401(RNA catabolic process);GO:0006955(immune response);GO:0009615(response to virus);GO:0009617(resp…	04621(NOD-like receptor signaling pathway);05160(Hepatitis C);05162(Measles);05164(Influenza A);05168(Herpes simplex virus 1 infection);05169(Epstein-Barr virus infection)	K14216	EC:2.7.7.84	2'-5' oligoadenylate synthetase 2 [Source:MGI Symbol;Acc:MGI:2180852]	protein_coding	NA	19.6429	23.5473	19.9459	12.3166	8.33406	10.6193	2.01907	1.01369	1.48763e-09	3.46516e-07	up	yes
37913	0	chr13	+	24327420	24477285	ENSMUST00000167746	17	9727	ENSMUSG00000016756	Cmah	GO:0005737(cytoplasm);GO:0005783(endoplasmic reticulum);GO:0006054(N-acetylneuraminate metabolic process);GO:0016491(oxidoreductase activity);GO:0030338(CMP-N-acetylneuraminate monooxygenase activity);GO:0046381(CMP-N-acetylneuraminate metabolic process);GO:0046872(metal ion binding);GO:0051536(iron-sulfur cluster binding);GO:0051537(2 iron, 2 sulfur cluster binding);GO:0055114(oxidation-reductio…	00520(Amino sugar and nucleotide sugar metabolism)	K08080	EC:1.14.18.2	cytidine monophospho-N-acetylneuraminic acid hydroxylase [Source:MGI Symbol;Acc:MGI:103227]	protein_coding	NA	1.24376	0	0	0	0	0	4145.86	12.0175	1.55307e-09	3.60786e-07	up	yes
89525	0	chr3	+	126596998	126844915	ENSMUST00000066466	19	4075	ENSMUSG00000053819	Camk2d	GO:0000082(G1/S transition of mitotic cell cycle);GO:0000166(nucleotide binding);GO:0001666(response to hypoxia);GO:0002028(regulation of sodium ion transport);GO:0003254(regulation of membrane depolarization);GO:0004672(protein kinase activity);GO:0004674(protein serine/threonine kinase activity);GO:0004683(calmodulin-dependent protein kinase activity);GO:0005515(protein binding);GO:0005516(calm…	04012(ErbB signaling pathway);04020(Calcium signaling pathway);04024(cAMP signaling pathway);04066(HIF-1 signaling pathway);04114(Oocyte meiosis);04217(Necroptosis);04261(Adrenergic signaling in cardiomyocytes);04310(Wnt signaling pathway);04360(Axon guidance);04713(Circadian entrainment);04720(Long-term potentiation);04722(Neurotrophin signaling pathway);04725(Cholinergic synapse);04728(Dopamine…	K04515	EC:2.7.11.17	calcium/calmodulin-dependent protein kinase II, delta [Source:MGI Symbol;Acc:MGI:1341265]	protein_coding	R_MMU_877300(Interferon_gamma_signaling);R_MMU_112315(Transmission_across_Chemical_Synapses);R_MMU_399721(Glutamate_binding,_activation_of_AMPA_receptors_and_synaptic_plasticity);R_MMU_5576892(Phase_0_rapid_depolarisation);R_MMU_936837(Ion_transport_by_P_type_ATPases);R_MMU_5683057(MAPK_family_signaling_cascades);R_MMU_5673001(RAF/MAP_kinase_cascade);R_MMU_2262752(Cellular_responses_to_stress);R_…	0	0	2.19999	0	0	0	7333.31	12.8402	1.59818e-09	3.70267e-07	up	yes
114966	0	chr6	+	140424161	140586499	ENSMUST00000203517	23	3006	ENSMUSG00000030231	Plekha5	GO:0005515(protein binding);GO:0005654(nucleoplasm);GO:0005829(cytosol);GO:0010314(phosphatidylinositol-5-phosphate binding);GO:0016020(membrane);GO:0016021(integral component of membrane);GO:0032266(phosphatidylinositol-3-phosphate binding);GO:0061458(reproductive system development);GO:0070273(phosphatidylinositol-4-phosphate binding);GO:0080025(phosphatidylinositol-3,5-bisphosphate binding)	NA	NA	NA	pleckstrin homology domain containing, family A member 5 [Source:MGI Symbol;Acc:MGI:1923802]	protein_coding	R_MMU_1483255(PI_Metabolism);R_MMU_556833(Metabolism_of_lipids);R_MMU_1430728(Metabolism);R_MMU_1483257(Phospholipid_metabolism);R_MMU_1660499(Synthesis_of_PIPs_at_the_plasma_membrane)	0	0	0	1.90785	0	0	0.000157245	-12.6347	1.63342e-09	3.77095e-07	down	yes
62272	0	chr17	-	36109719	36129425	ENSMUST00000046131	5	913	ENSMUSG00000092243	Gm7030	GO:0002476(antigen processing and presentation of endogenous peptide antigen via MHC class Ib);GO:0005615(extracellular space);GO:0009897(external side of plasma membrane);GO:0016020(membrane);GO:0016021(integral component of membrane)	04144(Endocytosis);04145(Phagosome);04218(Cellular senescence);04514(Cell adhesion molecules (CAMs));04612(Antigen processing and presentation);04650(Natural killer cell mediated cytotoxicity);04940(Type I diabetes mellitus);05163(Human cytomegalovirus infection);05165(Human papillomavirus infection);05166(Human T-cell leukemia virus 1 infection);05167(Kaposi sarcoma-associated herpesvirus infect…	K06751	NA	predicted gene 7030 [Source:MGI Symbol;Acc:MGI:3647514]	protein_coding	R_MMU_1236977(Endosomal/Vacuolar_pathway);R_MMU_1236975(Antigen_processing_Cross_presentation);R_MMU_1236974(ER_Phagosome_pathway);R_MMU_198933(Immunoregulatory_interactions_between_a_Lymphoid_and_a_non_Lymphoid_cell);R_MMU_168256(Immune_System);R_MMU_983170(Antigen_Presentation:_Folding,_assembly_and_peptide_loading_of_class_I_MHC);R_MMU_6798695(Neutrophil_degranulation);R_MMU_168249(Innate_Immu…	0.509704	0.530333	0.967374	0	0	0	6691.37	12.7081	1.63839e-09	3.77095e-07	up	yes
55755	0	chr16	+	35939011	35972605	ENSMUST00000023622	10	2973	ENSMUSG00000022906	Parp9	GO:0000122(negative regulation of transcription by RNA polymerase II);GO:0002230(positive regulation of defense response to virus by host);GO:0002376(immune system process);GO:0003714(transcription corepressor activity);GO:0003950(NAD+ ADP-ribosyltransferase activity);GO:0004857(enzyme inhibitor activity);GO:0005634(nucleus);GO:0005654(nucleoplasm);GO:0005737(cytoplasm);GO:0005739(mitochondrion);…	NA	K15260	EC:2.4.2.30	poly (ADP-ribose) polymerase family, member 9 [Source:MGI Symbol;Acc:MGI:1933117]	protein_coding	R_MMU_197264(Nicotinamide_salvaging);R_MMU_196854(Metabolism_of_vitamins_and_cofactors);R_MMU_1430728(Metabolism);R_MMU_196849(Metabolism_of_water_soluble_vitamins_and_cofactors);R_MMU_196807(Nicotinate_metabolism)	0	3.09251	0	0	0	0	10308.4	13.3315	1.64491e-09	3.77095e-07	up	yes
115477	0	chr6	+	149325458	149335658	ENSMUST00000189837	3	5469	ENSMUSG00000032712	Resf1	GO:0000930(gamma-tubulin complex);GO:0005634(nucleus);GO:0009617(response to bacterium);GO:0045869(negative regulation of single stranded viral RNA replication via double stranded DNA intermediate);GO:0090309(positive regulation of methylation-dependent chromatin silencing);GO:1990226(histone methyltransferase binding)	NA	NA	NA	retroelement silencing factor 1 [Source:MGI Symbol;Acc:MGI:1914496]	protein_coding	NA	0	0	1.6602	0	0	0	5533.99	12.4341	1.64516e-09	3.77095e-07	up	yes
64482	0	chr17	-	78852564	78882573	ENSMUST00000024884	16	4313	ENSMUSG00000024079	Eif2ak2	GO:0000166(nucleotide binding);GO:0000186(activation of MAPKK activity);GO:0001819(positive regulation of cytokine production);GO:0002376(immune system process);GO:0003723(RNA binding);GO:0003725(double-stranded RNA binding);GO:0004672(protein kinase activity);GO:0004674(protein serine/threonine kinase activity);GO:0004694(eukaryotic translation initiation factor 2alpha kinase activity);GO:000471…	04141(Protein processing in endoplasmic reticulum);04217(Necroptosis);05160(Hepatitis C);05162(Measles);05164(Influenza A);05165(Human papillomavirus infection);05167(Kaposi sarcoma-associated herpesvirus infection);05168(Herpes simplex virus 1 infection);05169(Epstein-Barr virus infection);05203(Viral carcinogenesis)	K16195	EC:2.7.11.1	eukaryotic translation initiation factor 2-alpha kinase 2 [Source:MGI Symbol;Acc:MGI:1353449]	protein_coding	R_MMU_1169408(ISG15_antiviral_mechanism);R_MMU_168256(Immune_System);R_MMU_1280215(Cytokine_Signaling_in_Immune_system);R_MMU_913531(Interferon_Signaling);R_MMU_1169410(Antiviral_mechanism_by_IFN_stimulated_genes)	25.5937	30.4168	34.8105	18.0104	15.8897	17.2878	1.77427	0.827223	1.65451e-09	3.78234e-07	up	no
105239	0	chr5	-	124118690	124216418	ENSMUST00000086123	24	6620	ENSMUSG00000029406	Pitpnm2	GO:0005509(calcium ion binding);GO:0005515(protein binding);GO:0005543(phospholipid binding);GO:0005548(phospholipid transporter activity);GO:0005737(cytoplasm);GO:0005856(cytoskeleton);GO:0008289(lipid binding);GO:0008525(phosphatidylcholine transporter activity);GO:0008526(phosphatidylinositol transfer activity);GO:0012505(endomembrane system);GO:0015914(phospholipid transport);GO:0016020(membr…	NA	NA	NA	phosphatidylinositol transfer protein, membrane-associated 2 [Source:MGI Symbol;Acc:MGI:1336192]	protein_coding	R_MMU_556833(Metabolism_of_lipids);R_MMU_1430728(Metabolism);R_MMU_1483257(Phospholipid_metabolism);R_MMU_1483226(Synthesis_of_PI);R_MMU_1483206(Glycerophospholipid_biosynthesis)	0	0	0	0	0	0.745732	0.000402289	-11.2795	1.6899e-09	3.85301e-07	down	yes
42248	0	chr13	-	116854961	117025273	ENSMUST00000226107	25	2728	ENSMUSG00000021725	Parp8	GO:0003950(NAD+ ADP-ribosyltransferase activity);GO:0006471(protein ADP-ribosylation);GO:0016740(transferase activity);GO:0016757(transferase activity, transferring glycosyl groups);GO:0070213(protein auto-ADP-ribosylation);GO:0140289(protein mono-ADP-ribosylation);GO:1990404(protein ADP-ribosylase activity)	NA	K15258	EC:2.4.2.30	poly (ADP-ribose) polymerase family, member 8 [Source:MGI Symbol;Acc:MGI:1098713]	nonsense_mediated_decay	R_MMU_197264(Nicotinamide_salvaging);R_MMU_196854(Metabolism_of_vitamins_and_cofactors);R_MMU_1430728(Metabolism);R_MMU_196849(Metabolism_of_water_soluble_vitamins_and_cofactors);R_MMU_196807(Nicotinate_metabolism)	0	0	0.386388	0	0	0	1287.96	10.3309	1.69909e-09	3.85357e-07	up	yes
109703	0	chr6	-	50207401	50263862	ENSMUST00000031845	11	2502	ENSMUSG00000029821	Gsdme	GO:0005546(phosphatidylinositol-4,5-bisphosphate binding);GO:0005737(cytoplasm);GO:0005829(cytosol);GO:0005886(plasma membrane);GO:0007605(sensory perception of sound);GO:0008219(cell death);GO:0008285(negative regulation of cell population proliferation);GO:0012501(programmed cell death);GO:0016020(membrane);GO:0043410(positive regulation of MAPK cascade);GO:0060113(inner ear receptor cell diffe…	NA	K22146	NA	gasdermin E [Source:MGI Symbol;Acc:MGI:1889850]	protein_coding	R_MMU_111457(Release_of_apoptotic_factors_from_the_mitochondria);R_MMU_5218859(Regulated_Necrosis);R_MMU_5357801(Programmed_Cell_Death);R_MMU_168898(Toll_like_Receptor_Cascades);R_MMU_5620971(Pyroptosis);R_MMU_111471(Apoptotic_factor_mediated_response);R_MMU_168256(Immune_System);R_MMU_109606(Intrinsic_Pathway_for_Apoptosis);R_MMU_109581(Apoptosis);R_MMU_168249(Innate_Immune_System);R_MMU_5686938…	0	0	0.418973	0	0	0	1396.58	10.4477	1.69909e-09	3.85357e-07	up	yes
57863	0	chr16	-	97447037	97462906	ENSMUST00000113768	9	2695	ENSMUSG00000000386	Mx1	GO:0000166(nucleotide binding);GO:0003924(GTPase activity);GO:0005525(GTP binding)	NA	NA	NA	MX dynamin-like GTPase 1 [Source:MGI Symbol;Acc:MGI:97243]	polymorphic_pseudogene	NA	0	3.56975	0	0	0	0	11899.2	13.5386	1.75812e-09	3.96165e-07	up	yes
30440	0	chr11	+	115877534	115892592	ENSMUST00000222123	43	5154	ENSMUSG00000034427	Myo15b	GO:0000166(nucleotide binding);GO:0003674(molecular_function);GO:0003774(motor activity);GO:0003779(actin binding);GO:0005515(protein binding);GO:0005524(ATP binding);GO:0005737(cytoplasm);GO:0005856(cytoskeleton);GO:0005903(brush border);GO:0008150(biological_process);GO:0016459(myosin complex)	NA	NA	NA	myosin XVB [Source:MGI Symbol;Acc:MGI:2685534]	protein_coding	NA	0	0	0	0	0	0.940651	0.000318928	-11.6145	1.76009e-09	3.96165e-07	down	yes
69903	0	chr19	+	7557485	7586711	ENSMUST00000136756	5	1901	ENSMUSG00000060675	Plaat3	GO:0004623(phospholipase A2 activity);GO:0005737(cytoplasm);GO:0005777(peroxisome);GO:0005778(peroxisomal membrane);GO:0005783(endoplasmic reticulum);GO:0005886(plasma membrane);GO:0006629(lipid metabolic process);GO:0006641(triglyceride metabolic process);GO:0006644(phospholipid metabolic process);GO:0007031(peroxisome organization);GO:0008654(phospholipid biosynthetic process);GO:0008970(phosph…	00564(Glycerophospholipid metabolism);00565(Ether lipid metabolism);00590(Arachidonic acid metabolism);00591(Linoleic acid metabolism);00592(alpha-Linolenic acid metabolism);04014(Ras signaling pathway);04923(Regulation of lipolysis in adipocytes)	K16817	3.1.1.4;EC:3.1.1.32	phospholipase A and acyltransferase 3 [Source:MGI Symbol;Acc:MGI:2179715]	protein_coding	R_MMU_556833(Metabolism_of_lipids);R_MMU_1430728(Metabolism);R_MMU_1483257(Phospholipid_metabolism);R_MMU_1482788(Acyl_chain_remodelling_of_PC);R_MMU_1482922(Acyl_chain_remodelling_of_PI);R_MMU_1482839(Acyl_chain_remodelling_of_PE);R_MMU_1482801(Acyl_chain_remodelling_of_PS);R_MMU_1483206(Glycerophospholipid_biosynthesis)	7.13614	6.93456	8.01579	12.2982	17.2062	14.6305	0.500431	-0.998757	1.76053e-09	3.96165e-07	down	no
129369	0	chr8	+	27042622	27054565	ENSMUST00000211393	8	2143	ENSMUSG00000031485	Plpbp	GO:0005739(mitochondrion);GO:0005829(cytosol);GO:0030170(pyridoxal phosphate binding)	NA	K06997	NA	pyridoxal phosphate binding protein [Source:MGI Symbol;Acc:MGI:1891207]	protein_coding	NA	0	0	0	0	0	2.25263	0.000133177	-12.8744	1.77724e-09	3.98883e-07	down	yes
15206	0	chr1	-	180165238	180193485	ENSMUST00000170472	15	3928	ENSMUSG00000026489	Coq8a	GO:0000166(nucleotide binding);GO:0005524(ATP binding);GO:0005739(mitochondrion);GO:0006468(protein phosphorylation);GO:0006744(ubiquinone biosynthetic process);GO:0016020(membrane);GO:0016021(integral component of membrane);GO:0016301(kinase activity);GO:0016310(phosphorylation);GO:0016740(transferase activity);GO:0031314(extrinsic component of mitochondrial inner membrane);GO:0043531(ADP bindin…	NA	K08869	NA	coenzyme Q8A [Source:MGI Symbol;Acc:MGI:1914676]	protein_coding	NA	0	0	0	1.39468	0	0	0.000215103	-12.1827	1.78984e-09	4.00668e-07	down	yes
117264	0	chr7	+	19382040	19395694	ENSMUST00000108460	22	3485	ENSMUSG00000030400	Ercc2	GO:0000019(regulation of mitotic recombination);GO:0000166(nucleotide binding);GO:0000439(transcription factor TFIIH core complex);GO:0000462(maturation of SSU-rRNA from tricistronic rRNA transcript (SSU-rRNA, 5.8S rRNA, LSU-rRNA));GO:0000717(nucleotide-excision repair, DNA duplex unwinding);GO:0001666(response to hypoxia);GO:0001701(in utero embryonic development);GO:0003676(nucleic acid binding…	03022(Basal transcription factors);03420(Nucleotide excision repair)	K10844	EC:3.6.4.12	excision repair cross-complementing rodent repair deficiency, complementation group 2 [Source:MGI Symbol;Acc:MGI:95413]	protein_coding	R_MMU_6782135(Dual_incision_in_TC_NER);R_MMU_674695(RNA_Polymerase_II_Pre_transcription_Events);R_MMU_6782210(Gap_filling_DNA_repair_synthesis_and_ligation_in_TC_NER);R_MMU_73863(RNA_Polymerase_I_Transcription_Termination);R_MMU_73857(RNA_Polymerase_II_Transcription);R_MMU_73854(RNA_Polymerase_I_Promoter_Clearance);R_MMU_73776(RNA_Polymerase_II_Promoter_Escape);R_MMU_73864(RNA_Polymerase_I_Transc…	0	0	0	0	0	1.37499	0.000218183	-12.1622	1.80194e-09	4.01358e-07	down	yes
55165	0	chr16	+	23609919	23614222	ENSMUST00000038423	2	1573	ENSMUSG00000033355	Rtp4	GO:0001580(detection of chemical stimulus involved in sensory perception of bitter taste);GO:0005515(protein binding);GO:0005737(cytoplasm);GO:0006612(protein targeting to membrane);GO:0016020(membrane);GO:0016021(integral component of membrane);GO:0031849(olfactory receptor binding);GO:0051205(protein insertion into membrane);GO:0051607(defense response to virus)	NA	NA	NA	receptor transporter protein 4 [Source:MGI Symbol;Acc:MGI:1915025]	protein_coding	R_MMU_9709957(Sensory_Perception);R_MMU_381753(Olfactory_Signaling_Pathway)	71.0984	70.5567	72.7745	34.4073	27.7444	41.6679	2.06541	1.04643	1.80223e-09	4.01358e-07	up	yes
12064	0	chr1	+	118469771	118607099	ENSMUST00000203646	33	4042	ENSMUSG00000064302	Clasp1	GO:0000226(microtubule cytoskeleton organization);GO:0000775(chromosome, centromeric region);GO:0000776(kinetochore);GO:0000777(condensed chromosome kinetochore);GO:0001578(microtubule bundle formation);GO:0002162(dystroglycan binding);GO:0005694(chromosome);GO:0005737(cytoplasm);GO:0005794(Golgi apparatus);GO:0005813(centrosome);GO:0005815(microtubule organizing center);GO:0005828(kinetochore mi…	NA	K16578	NA	CLIP associating protein 1 [Source:MGI Symbol;Acc:MGI:1923957]	processed_transcript	R_MMU_380287(Centrosome_maturation);R_MMU_380259(Loss_of_Nlp_from_mitotic_centrosomes);R_MMU_69620(Cell_Cycle_Checkpoints);R_MMU_2565942(Regulation_of_PLK1_Activity_at_G2/M_Transition);R_MMU_9648025(EML4_and_NUDC_in_mitotic_spindle_formation);R_MMU_2467813(Separation_of_Sister_Chromatids);R_MMU_1640170(Cell_Cycle);R_MMU_5617833(Cilium_Assembly);R_MMU_380270(Recruitment_of_mitotic_centrosome_prote…	0	3.83769	0	0	0	0	12792.3	13.643	1.8218e-09	4.04671e-07	up	yes
133488	0	chr8	-	111128886	111145459	ENSMUST00000127301	3	1067	ENSMUSG00000084808	9430091E24Rik	NA	NA	NA	NA	RIKEN cDNA 9430091E24 gene [Source:MGI Symbol;Acc:MGI:1924618]	processed_transcript	NA	0.141325	0.123221	0.118629	2.32865	2.08857	0.658238	0.0754956	-3.72746	1.85129e-09	4.10164e-07	down	yes
49451	0	chr15	+	44619591	44641026	ENSMUST00000022964	7	1613	ENSMUSG00000022339	Ebag9	GO:0000139(Golgi membrane);GO:0005794(Golgi apparatus);GO:0006915(apoptotic process);GO:0016020(membrane);GO:0016021(integral component of membrane);GO:0030141(secretory granule)	04915(Estrogen signaling pathway)	K22455	NA	estrogen receptor-binding fragment-associated gene 9 [Source:MGI Symbol;Acc:MGI:1859920]	protein_coding	NA	0	0	0	0	3.07753	0	9.74807e-05	-13.3245	1.85879e-09	4.10768e-07	down	yes
108988	0	chr6	-	39397804	39419776	ENSMUST00000114823	8	2992	ENSMUSG00000029922	Mkrn1	GO:0000209(protein polyubiquitination);GO:0003682(chromatin binding);GO:0016567(protein ubiquitination);GO:0016740(transferase activity);GO:0046872(metal ion binding);GO:0061630(ubiquitin protein ligase activity);GO:1990830(cellular response to leukemia inhibitory factor)	NA	K15687	EC:2.3.2.27	makorin, ring finger protein, 1 [Source:MGI Symbol;Acc:MGI:1859353]	protein_coding	R_MMU_1257604(PIP3_activates_AKT_signaling);R_MMU_6807070(PTEN_Regulation);R_MMU_8948751(Regulation_of_PTEN_stability_and_activity);R_MMU_168256(Immune_System);R_MMU_983168(Antigen_processing:_Ubiquitination_&_Proteasome_degradation);R_MMU_198323(AKT_phosphorylates_targets_in_the_cytosol);R_MMU_162582(Signal_Transduction);R_MMU_1280218(Adaptive_Immune_System);R_MMU_9006925(Intracellular_signaling…	2.78173	0	0	0	0	0	9272.43	13.1787	1.86885e-09	4.11935e-07	up	yes
30069	0	chr11	-	110025634	110095978	ENSMUST00000100287	39	5619	ENSMUSG00000041828	Abca8a	GO:0000166(nucleotide binding);GO:0005319(lipid transporter activity);GO:0005524(ATP binding);GO:0005886(plasma membrane);GO:0006869(lipid transport);GO:0016020(membrane);GO:0016021(integral component of membrane);GO:0016887(ATPase activity);GO:0042626(ATPase-coupled transmembrane transporter activity);GO:0043231(intracellular membrane-bounded organelle);GO:0055085(transmembrane transport)	02010(ABC transporters)	K05650	NA	ATP-binding cassette, sub-family A (ABC1), member 8a [Source:MGI Symbol;Acc:MGI:2386846]	protein_coding	NA	1.50966	0.870246	1.05834	0.110258	0.259363	0.222486	5.80679	2.53774	1.88001e-09	4.12344e-07	up	yes
94525	0	chr4	-	109061655	109202234	ENSMUST00000159545	23	2754	ENSMUSG00000028559	Osbpl9	GO:0005768(endosome);GO:0005794(Golgi apparatus);GO:0005829(cytosol);GO:0006869(lipid transport);GO:0008289(lipid binding);GO:0015248(sterol transporter activity);GO:0015918(sterol transport);GO:0016020(membrane);GO:0031902(late endosome membrane);GO:0032934(sterol binding);GO:0043231(intracellular membrane-bounded organelle)	NA	K20465	NA	oxysterol binding protein-like 9 [Source:MGI Symbol;Acc:MGI:1923784]	nonsense_mediated_decay	R_MMU_556833(Metabolism_of_lipids);R_MMU_1430728(Metabolism);R_MMU_8957322(Metabolism_of_steroids);R_MMU_194068(Bile_acid_and_bile_salt_metabolism);R_MMU_192105(Synthesis_of_bile_acids_and_bile_salts)	0	0	0	0	0	1.70333	0.000176125	-12.4711	1.88258e-09	4.12344e-07	down	yes
104615	0	chr5	+	120511235	120534019	ENSMUST00000111890	15	2775	ENSMUSG00000032754	Slc8b1	GO:0005432(calcium:sodium antiporter activity);GO:0005739(mitochondrion);GO:0005743(mitochondrial inner membrane);GO:0005886(plasma membrane);GO:0006811(ion transport);GO:0006812(cation transport);GO:0006814(sodium ion transport);GO:0006816(calcium ion transport);GO:0006851(mitochondrial calcium ion transmembrane transport);GO:0006874(cellular calcium ion homeostasis);GO:0008324(cation transmembr…	NA	K13754	NA	solute carrier family 8 (sodium/lithium/calcium exchanger), member B1 [Source:MGI Symbol;Acc:MGI:2180781]	protein_coding	R_MMU_425393(Transport_of_inorganic_cations/anions_and_amino_acids/oligopeptides);R_MMU_425407(SLC_mediated_transmembrane_transport);R_MMU_382551(Transport_of_small_molecules);R_MMU_425561(Sodium/Calcium_exchangers);R_MMU_8949215(Mitochondrial_calcium_ion_transport)	0.43399	0.705493	0.227691	0.033799	0.012496	0.005222	26.5383	4.73	1.88505e-09	4.12344e-07	up	yes
14724	0	chr1	-	172066013	172082795	ENSMUST00000146137	16	2777	ENSMUSG00000003458	Ncstn	GO:0002262(myeloid cell homeostasis);GO:0004175(endopeptidase activity);GO:0005515(protein binding);GO:0005737(cytoplasm);GO:0005739(mitochondrion);GO:0005764(lysosome);GO:0005765(lysosomal membrane);GO:0005769(early endosome);GO:0005783(endoplasmic reticulum);GO:0005794(Golgi apparatus);GO:0005886(plasma membrane);GO:0005887(integral component of plasma membrane);GO:0006509(membrane protein ecto…	04330(Notch signaling pathway);05010(Alzheimer disease)	K06171	NA	nicastrin [Source:MGI Symbol;Acc:MGI:1891700]	nonsense_mediated_decay	R_MMU_204998(Cell_death_signalling_via_NRAGE,_NRIF_and_NADE);R_MMU_73887(Death_Receptor_Signalling);R_MMU_9012852(Signaling_by_NOTCH3);R_MMU_157118(Signaling_by_NOTCH);R_MMU_205043(NRIF_signals_cell_death_from_the_nucleus);R_MMU_193704(p75_NTR_receptor_mediated_signalling);R_MMU_9017802(Noncanonical_activation_of_NOTCH3);R_MMU_168256(Immune_System);R_MMU_422475(Axon_guidance);R_MMU_1236394(Signal…	5.12873	0	0	0	0	0	17095.8	14.0614	1.90674e-09	4.16031e-07	up	yes
68780	0	chr19	-	4007384	4012694	ENSMUST00000237862	10	1619	ENSMUSG00000037916	Ndufv1	GO:0005515(protein binding);GO:0005739(mitochondrion);GO:0005743(mitochondrial inner membrane);GO:0005747(mitochondrial respiratory chain complex I);GO:0005829(cytosol);GO:0006120(mitochondrial electron transport, NADH to ubiquinone);GO:0008137(NADH dehydrogenase (ubiquinone) activity);GO:0010181(FMN binding);GO:0016020(membrane);GO:0016491(oxidoreductase activity);GO:0016651(oxidoreductase activ…	00190(Oxidative phosphorylation);04714(Thermogenesis);04723(Retrograde endocannabinoid signaling);04932(Non-alcoholic fatty liver disease (NAFLD));05010(Alzheimer disease);05012(Parkinson disease);05016(Huntington disease)	K03942	1.6.99.3;EC:7.1.1.2	NADH:ubiquinone oxidoreductase core subunit V1 [Source:MGI Symbol;Acc:MGI:107851]	protein_coding	R_MMU_1430728(Metabolism);R_MMU_6799198(Complex_I_biogenesis);R_MMU_611105(Respiratory_electron_transport);R_MMU_163200(Respiratory_electron_transport,_ATP_synthesis_by_chemiosmotic_coupling,_and_heat_production_by_uncoupling_proteins.);R_MMU_1428517(The_citric_acid_(TCA)_cycle_and_respiratory_electron_transport)	8.69561	0	0	0	0	0	28985.4	14.823	1.91271e-09	4.1628e-07	up	yes
141816	0	chr9	+	113812598	113918190	ENSMUST00000214522	35	4159	ENSMUSG00000033392	Clasp2	GO:0000226(microtubule cytoskeleton organization);GO:0000775(chromosome, centromeric region);GO:0000776(kinetochore);GO:0000777(condensed chromosome kinetochore);GO:0002162(dystroglycan binding);GO:0005737(cytoplasm);GO:0005794(Golgi apparatus);GO:0005802(trans-Golgi network);GO:0005829(cytosol);GO:0005874(microtubule);GO:0005881(cytoplasmic microtubule);GO:0005886(plasma membrane);GO:0005925(foc…	NA	K16578	NA	CLIP associating protein 2 [Source:MGI Symbol;Acc:MGI:1923749]	protein_coding	R_MMU_69620(Cell_Cycle_Checkpoints);R_MMU_9648025(EML4_and_NUDC_in_mitotic_spindle_formation);R_MMU_2467813(Separation_of_Sister_Chromatids);R_MMU_1640170(Cell_Cycle);R_MMU_141444(Amplification__of_signal_from_unattached__kinetochores_via_a_MAD2__inhibitory_signal);R_MMU_5663220(RHO_GTPases_Activate_Formins);R_MMU_69278(Cell_Cycle,_Mitotic);R_MMU_2500257(Resolution_of_Sister_Chromatid_Cohesion);R…	0	0	1.94618	0	0	0	6487.26	12.6634	2.00085e-09	4.34365e-07	up	yes
55164	0	chr16	+	23609057	23613736	ENSMUST00000210901	3	1158	ENSMUSG00000033355	Rtp4	GO:0001580(detection of chemical stimulus involved in sensory perception of bitter taste);GO:0005515(protein binding);GO:0005737(cytoplasm);GO:0006612(protein targeting to membrane);GO:0016020(membrane);GO:0016021(integral component of membrane);GO:0031849(olfactory receptor binding);GO:0051205(protein insertion into membrane);GO:0051607(defense response to virus)	NA	NA	NA	receptor transporter protein 4 [Source:MGI Symbol;Acc:MGI:1915025]	protein_coding	R_MMU_9709957(Sensory_Perception);R_MMU_381753(Olfactory_Signaling_Pathway)	0	0	6.90358	0	0	0	23011.9	14.4901	2.06062e-09	4.46217e-07	up	yes
127294	0	chr7	-	141009586	141010770	ENSMUST00000026565	2	678	ENSMUSG00000025492	Ifitm3	GO:0002376(immune system process);GO:0005634(nucleus);GO:0005737(cytoplasm);GO:0005764(lysosome);GO:0005765(lysosomal membrane);GO:0005768(endosome);GO:0005783(endoplasmic reticulum);GO:0005886(plasma membrane);GO:0006898(receptor-mediated endocytosis);GO:0008285(negative regulation of cell population proliferation);GO:0009615(response to virus);GO:0009986(cell surface);GO:0016020(membrane);GO:00…	NA	K06566	NA	interferon induced transmembrane protein 3 [Source:MGI Symbol;Acc:MGI:1913391]	protein_coding	R_MMU_198933(Immunoregulatory_interactions_between_a_Lymphoid_and_a_non_Lymphoid_cell);R_MMU_168256(Immune_System);R_MMU_1280218(Adaptive_Immune_System)	545.419	466.793	686.306	215.716	234.785	296.561	2.2736	1.18498	2.06969e-09	4.47059e-07	up	yes
22190	0	chr10	+	128091610	128129302	ENSMUST00000217851	29	8385	ENSMUSG00000040054	Baz2a	GO:0001164(RNA polymerase I core promoter sequence-specific DNA binding);GO:0001188(RNA polymerase I preinitiation complex assembly);GO:0003677(DNA binding);GO:0005515(protein binding);GO:0005634(nucleus);GO:0005829(cytosol);GO:0016607(nuclear speck);GO:0042025(host cell nucleus);GO:0042393(histone binding);GO:0046872(metal ion binding)	NA	K15224	NA	bromodomain adjacent to zinc finger domain, 2A [Source:MGI Symbol;Acc:MGI:2151152]	protein_coding	NA	0	0	0	0	0	0.528654	0.000567479	-10.7831	2.13808e-09	4.60675e-07	down	yes
66531	0	chr18	+	37815401	37841873	ENSMUST00000195239	4	2272	ENSMUSG00000023036	Pcdhgc4	GO:0003674(molecular_function);GO:0005509(calcium ion binding);GO:0005886(plasma membrane);GO:0007155(cell adhesion);GO:0007156(homophilic cell adhesion via plasma membrane adhesion molecules);GO:0016020(membrane);GO:0016021(integral component of membrane);GO:0050808(synapse organization)	NA	K16497	NA	protocadherin gamma subfamily C, 4 [Source:MGI Symbol;Acc:MGI:1935203]	protein_coding	NA	4.36163	0	0	0	0	0	14538.8	13.8276	2.17168e-09	4.66749e-07	up	yes
104659	0	chr5	-	120753098	120777661	ENSMUST00000044833	16	4720	ENSMUSG00000032661	Oas3	GO:0000166(nucleotide binding);GO:0001730(2'-5'-oligoadenylate synthetase activity);GO:0002376(immune system process);GO:0003723(RNA binding);GO:0003725(double-stranded RNA binding);GO:0005524(ATP binding);GO:0005634(nucleus);GO:0005654(nucleoplasm);GO:0005737(cytoplasm);GO:0005829(cytosol);GO:0005886(plasma membrane);GO:0006955(immune response);GO:0009615(response to virus);GO:0016020(membrane);…	04621(NOD-like receptor signaling pathway);05160(Hepatitis C);05162(Measles);05164(Influenza A);05168(Herpes simplex virus 1 infection);05169(Epstein-Barr virus infection)	K14216	EC:2.7.7.84	2'-5' oligoadenylate synthetase 3 [Source:MGI Symbol;Acc:MGI:2180850]	protein_coding	NA	9.54231	10.2764	14.7531	3.94995	2.73279	4.67394	3.04417	1.60605	2.19389e-09	4.7035e-07	up	yes
80196	0	chr2	-	122594467	122611303	ENSMUST00000028624	9	2389	ENSMUSG00000027199	Gatm	GO:0005739(mitochondrion);GO:0005743(mitochondrial inner membrane);GO:0005758(mitochondrial intermembrane space);GO:0006600(creatine metabolic process);GO:0006601(creatine biosynthetic process);GO:0007275(multicellular organism development);GO:0007584(response to nutrient);GO:0007611(learning or memory);GO:0010033(response to organic substance);GO:0014889(muscle atrophy);GO:0015067(amidinotransfe…	00260(Glycine, serine and threonine metabolism);00330(Arginine and proline metabolism)	K00613	EC:2.1.4.1	glycine amidinotransferase (L-arginine:glycine amidinotransferase) [Source:MGI Symbol;Acc:MGI:1914342]	protein_coding	R_MMU_71288(Creatine_metabolism);R_MMU_1430728(Metabolism);R_MMU_71291(Metabolism_of_amino_acids_and_derivatives)	0.142256	0.17217	0.329788	1.34627	1.0913	1.2463	0.174874	-2.51561	2.21177e-09	4.73005e-07	down	yes
64295	0	chr17	-	73883908	73950145	ENSMUST00000233162	36	7775	ENSMUSG00000024066	Xdh	GO:0001933(negative regulation of protein phosphorylation);GO:0001937(negative regulation of endothelial cell proliferation);GO:0004854(xanthine dehydrogenase activity);GO:0004855(xanthine oxidase activity);GO:0005506(iron ion binding);GO:0005515(protein binding);GO:0005576(extracellular region);GO:0005615(extracellular space);GO:0005737(cytoplasm);GO:0005777(peroxisome);GO:0005829(cytosol);GO:00…	00230(Purine metabolism);00232(Caffeine metabolism);00983(Drug metabolism - other enzymes);04146(Peroxisome)	K00106	1.17.3.2;EC:1.17.1.4	xanthine dehydrogenase [Source:MGI Symbol;Acc:MGI:98973]	retained_intron	R_MMU_1430728(Metabolism);R_MMU_8956319(Nucleobase_catabolism);R_MMU_8851680(Butyrophilin_(BTN)_family_interactions);R_MMU_168256(Immune_System);R_MMU_1280218(Adaptive_Immune_System);R_MMU_15869(Metabolism_of_nucleotides);R_MMU_74259(Purine_catabolism)	54.6923	62.9956	63.2405	45.9704	44.899	43.107	1.35045	0.433439	2.24658e-09	4.79261e-07	up	no
67706	0	chr18	+	65625138	65689443	ENSMUST00000237756	7	3580	ENSMUSG00000042439	Zfp532	GO:0003676(nucleic acid binding);GO:0003677(DNA binding);GO:0005634(nucleus);GO:0008150(biological_process);GO:0046872(metal ion binding)	NA	NA	NA	zinc finger protein 532 [Source:MGI Symbol;Acc:MGI:3036282]	nonsense_mediated_decay	NA	0	0	0	0	1.26776	0	0.000236638	-12.045	2.26389e-09	4.8176e-07	down	yes
82802	0	chr2	-	165276554	165287755	ENSMUST00000109299	10	1926	ENSMUSG00000017664	Slc35c2	GO:0005654(nucleoplasm);GO:0005793(endoplasmic reticulum-Golgi intermediate compartment);GO:0005794(Golgi apparatus);GO:0005801(cis-Golgi network);GO:0010629(negative regulation of gene expression);GO:0015297(antiporter activity);GO:0015786(UDP-glucose transmembrane transport);GO:0016020(membrane);GO:0016021(integral component of membrane);GO:0022857(transmembrane transporter activity);GO:0033116…	NA	K15280	NA	solute carrier family 35, member C2 [Source:MGI Symbol;Acc:MGI:2385166]	protein_coding	NA	0	4.63646	0	0	0	0	15454.9	13.9158	2.27866e-09	4.82738e-07	up	yes
103380	0	chr5	+	106964561	106984431	ENSMUST00000118261	12	3129	ENSMUSG00000029283	Cdc7	GO:0000166(nucleotide binding);GO:0000727(double-strand break repair via break-induced replication);GO:0004672(protein kinase activity);GO:0004674(protein serine/threonine kinase activity);GO:0005524(ATP binding);GO:0005634(nucleus);GO:0005654(nucleoplasm);GO:0005737(cytoplasm);GO:0006468(protein phosphorylation);GO:0007049(cell cycle);GO:0008284(positive regulation of cell population proliferati…	04110(Cell cycle)	K02214	EC:2.7.11.1	cell division cycle 7 (S. cerevisiae) [Source:MGI Symbol;Acc:MGI:1309511]	protein_coding	R_MMU_69620(Cell_Cycle_Checkpoints);R_MMU_69206(G1/S_Transition);R_MMU_1640170(Cell_Cycle);R_MMU_69481(G2/M_Checkpoints);R_MMU_69278(Cell_Cycle,_Mitotic);R_MMU_453279(Mitotic_G1_phase_and_G1/S_transition);R_MMU_69306(DNA_Replication);R_MMU_69002(DNA_Replication_Pre_Initiation);R_MMU_176187(Activation_of_ATR_in_response_to_replication_stress);R_MMU_68962(Activation_of_the_pre_replicative_complex)	0.065651	0.877192	0.72955	0	0	0	5574.64	12.4447	2.28298e-09	4.82738e-07	up	yes
117331	0	chr7	-	19606217	19629438	ENSMUST00000094762	12	2209	ENSMUSG00000002983	Relb	GO:0000122(negative regulation of transcription by RNA polymerase II);GO:0000790(nuclear chromatin);GO:0000977(RNA polymerase II regulatory region sequence-specific DNA binding);GO:0000978(RNA polymerase II cis-regulatory region sequence-specific DNA binding);GO:0000981(DNA-binding transcription factor activity, RNA polymerase II-specific);GO:0001228(DNA-binding transcription activator activity, …	04010(MAPK signaling pathway);04064(NF-kappa B signaling pathway);04380(Osteoclast differentiation);04625(C-type lectin receptor signaling pathway);05166(Human T-cell leukemia virus 1 infection);05169(Epstein-Barr virus infection)	K09253	NA	avian reticuloendotheliosis viral (v-rel) oncogene related B [Source:MGI Symbol;Acc:MGI:103289]	protein_coding	R_MMU_5668541(TNFR2_non_canonical_NF_kB_pathway);R_MMU_5607761(Dectin_1_mediated_noncanonical_NF_kB_signaling);R_MMU_5607764(CLEC7A_(Dectin_1)_signaling);R_MMU_5621481(C_type_lectin_receptors_(CLRs));R_MMU_168256(Immune_System);R_MMU_1280215(Cytokine_Signaling_in_Immune_system);R_MMU_5676590(NIK__>noncanonical_NF_kB_signaling);R_MMU_168249(Innate_Immune_System);R_MMU_5621575(CD209_(DC_SIGN)_signa…	3.44135	0	0	0	0	0	11471.2	13.4857	2.28528e-09	4.82738e-07	up	yes
25686	0	chr11	+	67200404	67224573	ENSMUST00000075734	39	6012	ENSMUSG00000056328	Myh1	GO:0000166(nucleotide binding);GO:0003774(motor activity);GO:0003779(actin binding);GO:0005515(protein binding);GO:0005516(calmodulin binding);GO:0005524(ATP binding);GO:0005737(cytoplasm);GO:0005859(muscle myosin complex);GO:0006936(muscle contraction);GO:0014704(intercalated disc);GO:0016459(myosin complex);GO:0030016(myofibril);GO:0031672(A band);GO:0032982(myosin filament);GO:0036464(cytoplas…	04530(Tight junction)	K10352	NA	myosin, heavy polypeptide 1, skeletal muscle, adult [Source:MGI Symbol;Acc:MGI:1339711]	protein_coding	NA	0	0	0	0	0.745519	0	0.000402404	-11.2791	2.32562e-09	4.90058e-07	down	yes
77499	0	chr2	+	83724555	83806916	ENSMUST00000111740	28	6788	ENSMUSG00000027087	Itgav	GO:0001525(angiogenesis);GO:0001568(blood vessel development);GO:0001570(vasculogenesis);GO:0001846(opsonin binding);GO:0001968(fibronectin binding);GO:0002020(protease binding);GO:0005080(protein kinase C binding);GO:0005102(signaling receptor binding);GO:0005178(integrin binding);GO:0005245(voltage-gated calcium channel activity);GO:0005829(cytosol);GO:0005886(plasma membrane);GO:0005925(focal …	04145(Phagosome);04151(PI3K-Akt signaling pathway);04510(Focal adhesion);04512(ECM-receptor interaction);04514(Cell adhesion molecules (CAMs));04810(Regulation of actin cytoskeleton);04919(Thyroid hormone signaling pathway);05163(Human cytomegalovirus infection);05165(Human papillomavirus infection);05200(Pathways in cancer);05205(Proteoglycans in cancer);05222(Small cell lung cancer);05410(Hyper…	K06487	NA	integrin alpha V [Source:MGI Symbol;Acc:MGI:96608]	protein_coding	R_MMU_3000171(Non_integrin_membrane_ECM_interactions);R_MMU_2129379(Molecules_associated_with_elastic_fibres);R_MMU_373760(L1CAM_interactions);R_MMU_4420097(VEGFA_VEGFR2_Pathway);R_MMU_109582(Hemostasis);R_MMU_1236975(Antigen_processing_Cross_presentation);R_MMU_1474244(Extracellular_matrix_organization);R_MMU_3000170(Syndecan_interactions);R_MMU_202733(Cell_surface_interactions_at_the_vascular_w…	0	1.42281	0	0	0	0	4742.68	12.2115	2.36692e-09	4.97327e-07	up	yes
85151	0	chr3	+	41742618	41758939	ENSMUST00000146165	7	3574	ENSMUSG00000025766	D3Ertd751e	GO:0003674(molecular_function);GO:0005575(cellular_component);GO:0008150(biological_process)	NA	NA	NA	DNA segment, Chr 3, ERATO Doi 751, expressed [Source:MGI Symbol;Acc:MGI:1289213]	protein_coding	NA	0	0	0	0	0	1.18196	0.000253817	-11.9439	2.37166e-09	4.97327e-07	down	yes
127387	0	chr7	-	141263184	141266423	ENSMUST00000097952	9	1764	ENSMUSG00000025498	Irf7	GO:0000976(transcription regulatory region sequence-specific DNA binding);GO:0000978(RNA polymerase II cis-regulatory region sequence-specific DNA binding);GO:0000981(DNA-binding transcription factor activity, RNA polymerase II-specific);GO:0000987(cis-regulatory region sequence-specific DNA binding);GO:0002376(immune system process);GO:0002819(regulation of adaptive immune response);GO:0003677(D…	04620(Toll-like receptor signaling pathway);04621(NOD-like receptor signaling pathway);04622(RIG-I-like receptor signaling pathway);04623(Cytosolic DNA-sensing pathway);05160(Hepatitis C);05161(Hepatitis B);05162(Measles);05164(Influenza A);05167(Kaposi sarcoma-associated herpesvirus infection);05168(Herpes simplex virus 1 infection);05169(Epstein-Barr virus infection);05203(Viral carcinogenesis)	K09447	NA	interferon regulatory factor 7 [Source:MGI Symbol;Acc:MGI:1859212]	protein_coding	R_MMU_918233(TRAF3_dependent_IRF_activation_pathway);R_MMU_936964(Activation_of_IRF3/IRF7_mediated_by_TBK1/IKK_epsilon);R_MMU_975110(TRAF6_mediated_IRF7_activation_in_TLR7/8_or_9_signaling);R_MMU_166016(Toll_Like_Receptor_4_(TLR4)_Cascade);R_MMU_168181(Toll_Like_Receptor_7/8_(TLR7/8)_Cascade);R_MMU_168928(DDX58/IFIH1_mediated_induction_of_interferon_alpha/beta);R_MMU_168898(Toll_like_Receptor_Cas…	10.3605	7.08242	26.6459	1.6962	1.39549	2.43471	7.97787	2.996	2.38583e-09	4.99085e-07	up	yes
49757	0	chr15	+	59315107	59331192	ENSMUST00000100640	10	2636	ENSMUSG00000022351	Sqle	GO:0004497(monooxygenase activity);GO:0004506(squalene monooxygenase activity);GO:0005783(endoplasmic reticulum);GO:0005789(endoplasmic reticulum membrane);GO:0006725(cellular aromatic compound metabolic process);GO:0008203(cholesterol metabolic process);GO:0010033(response to organic substance);GO:0016020(membrane);GO:0016021(integral component of membrane);GO:0016126(sterol biosynthetic process…	00100(Steroid biosynthesis)	K00511	EC:1.14.14.17	squalene epoxidase [Source:MGI Symbol;Acc:MGI:109296]	protein_coding	R_MMU_556833(Metabolism_of_lipids);R_MMU_1430728(Metabolism);R_MMU_191273(Cholesterol_biosynthesis);R_MMU_8957322(Metabolism_of_steroids)	0	0	0	1.65448	0	0	0.000181326	-12.4291	2.44458e-09	5.10135e-07	down	yes
67879	0	chr18	-	68260187	68300333	ENSMUST00000042852	4	9651	ENSMUSG00000038121	Fam210a	GO:0003674(molecular_function);GO:0005737(cytoplasm);GO:0005739(mitochondrion);GO:0008150(biological_process);GO:0016020(membrane);GO:0016021(integral component of membrane)	NA	NA	NA	family with sequence similarity 210, member A [Source:MGI Symbol;Acc:MGI:1914000]	protein_coding	NA	9.55815	10.4304	9.40149	12.6146	12.392	11.5197	0.804629	-0.313604	2.48869e-09	5.18087e-07	down	no
87036	0	chr3	+	89715022	89753446	ENSMUST00000098924	15	5909	ENSMUSG00000027951	Adar	GO:0001649(osteoblast differentiation);GO:0002244(hematopoietic progenitor cell differentiation);GO:0002376(immune system process);GO:0002566(somatic diversification of immune receptors via somatic mutation);GO:0003677(DNA binding);GO:0003692(left-handed Z-DNA binding);GO:0003723(RNA binding);GO:0003725(double-stranded RNA binding);GO:0003726(double-stranded RNA adenosine deaminase activity);GO:0…	04623(Cytosolic DNA-sensing pathway);05162(Measles);05164(Influenza A)	K12968	EC:3.5.4.37	adenosine deaminase, RNA-specific [Source:MGI Symbol;Acc:MGI:1889575]	protein_coding	R_MMU_75072(mRNA_Editing);R_MMU_75064(mRNA_Editing:_A_to_I_Conversion);R_MMU_75102(C6_deamination_of_adenosine);R_MMU_8953854(Metabolism_of_RNA);R_MMU_77042(Formation_of_editosomes_by_ADAR_proteins)	10.7466	8.14491	9.86535	2.82664	4.49509	4.2088	2.49398	1.31845	2.51154e-09	5.21584e-07	up	yes
39212	0	chr13	+	54071869	54108342	ENSMUST00000021930	11	2783	ENSMUSG00000021474	Sfxn1	GO:0005739(mitochondrion);GO:0005743(mitochondrial inner membrane);GO:0006730(one-carbon metabolic process);GO:0006811(ion transport);GO:0006826(iron ion transport);GO:0006865(amino acid transport);GO:0015075(ion transmembrane transporter activity);GO:0015194(L-serine transmembrane transporter activity);GO:0015825(L-serine transport);GO:0016020(membrane);GO:0016021(integral component of membrane)…	NA	NA	NA	sideroflexin 1 [Source:MGI Symbol;Acc:MGI:2137677]	protein_coding	NA	48.628	51.0767	48.2223	57.8701	58.2819	56.684	0.855881	-0.224517	2.55904e-09	5.30169e-07	down	no
25	0	MT	+	9459	9806	ENSMUST00000082411	1	348	ENSMUSG00000064360	mt-Nd3	GO:0005739(mitochondrion);GO:0005747(mitochondrial respiratory chain complex I);GO:0006979(response to oxidative stress);GO:0008137(NADH dehydrogenase (ubiquinone) activity);GO:0009642(response to light intensity);GO:0009725(response to hormone);GO:0016020(membrane);GO:0016021(integral component of membrane);GO:0016491(oxidoreductase activity);GO:0030964(NADH dehydrogenase complex);GO:0031966(mit…	00190(Oxidative phosphorylation);04714(Thermogenesis);04723(Retrograde endocannabinoid signaling);05012(Parkinson disease)	K03880	EC:7.1.1.2	mitochondrially encoded NADH dehydrogenase 3 [Source:MGI Symbol;Acc:MGI:102499]	protein_coding	R_MMU_1430728(Metabolism);R_MMU_6799198(Complex_I_biogenesis);R_MMU_611105(Respiratory_electron_transport);R_MMU_163200(Respiratory_electron_transport,_ATP_synthesis_by_chemiosmotic_coupling,_and_heat_production_by_uncoupling_proteins.);R_MMU_1428517(The_citric_acid_(TCA)_cycle_and_respiratory_electron_transport)	623.803	761.695	741.078	1237.47	1345.41	979.586	0.59694	-0.744341	2.56814e-09	5.3078e-07	down	no
22189	0	chr10	+	128091582	128129303	ENSMUST00000238829	29	8411	ENSMUSG00000040054	Baz2a	GO:0001164(RNA polymerase I core promoter sequence-specific DNA binding);GO:0001188(RNA polymerase I preinitiation complex assembly);GO:0003677(DNA binding);GO:0005515(protein binding);GO:0005634(nucleus);GO:0005829(cytosol);GO:0016607(nuclear speck);GO:0042025(host cell nucleus);GO:0042393(histone binding);GO:0046872(metal ion binding)	NA	K15224	NA	bromodomain adjacent to zinc finger domain, 2A [Source:MGI Symbol;Acc:MGI:2151152]	protein_coding	NA	0	0	0	0	0	0.479789	0.000625275	-10.6432	2.60779e-09	5.37685e-07	down	yes
91569	0	chr4	+	32615473	32653265	ENSMUST00000178925	11	6557	ENSMUSG00000028282	Casp8ap2	GO:0002020(protease binding);GO:0003714(transcription corepressor activity);GO:0005515(protein binding);GO:0005634(nucleus);GO:0005737(cytoplasm);GO:0005739(mitochondrion);GO:0006915(apoptotic process);GO:0006919(activation of cysteine-type endopeptidase activity involved in apoptotic process);GO:0007049(cell cycle);GO:0008625(extrinsic apoptotic signaling pathway via death domain receptors);GO:0…	NA	NA	NA	caspase 8 associated protein 2 [Source:MGI Symbol;Acc:MGI:1349399]	protein_coding	R_MMU_597592(Post_translational_protein_modification);R_MMU_392499(Metabolism_of_proteins);R_MMU_3108232(SUMO_E3_ligases_SUMOylate_target_proteins);R_MMU_3899300(SUMOylation_of_transcription_cofactors);R_MMU_2990846(SUMOylation)	1.08292	0	0	0	0	0	3609.74	11.8177	2.64787e-09	5.44647e-07	up	yes
92334	0	chr4	-	44524757	44710487	ENSMUST00000014174	10	8004	ENSMUSG00000014030	Pax5	GO:0000122(negative regulation of transcription by RNA polymerase II);GO:0000978(RNA polymerase II cis-regulatory region sequence-specific DNA binding);GO:0001228(DNA-binding transcription activator activity, RNA polymerase II-specific);GO:0001650(fibrillar center);GO:0003677(DNA binding);GO:0003700(DNA-binding transcription factor activity);GO:0005515(protein binding);GO:0005634(nucleus);GO:0005…	05202(Transcriptional misregulation in cancer)	K09383	NA	paired box 5 [Source:MGI Symbol;Acc:MGI:97489]	protein_coding	R_MMU_8939245(RUNX1_regulates_transcription_of_genes_involved_in_BCR_signaling);R_MMU_73857(RNA_Polymerase_II_Transcription);R_MMU_212436(Generic_Transcription_Pathway);R_MMU_74160(Gene_expression_(Transcription));R_MMU_8878171(Transcriptional_regulation_by_RUNX1)	0.138906	0.139527	0.201667	0.017956	0.027553	0.031532	6.23175	2.63964	2.65864e-09	5.45558e-07	up	yes
87759	0	chr3	+	95499256	95509362	ENSMUST00000015664	8	1512	ENSMUSG00000028111	Ctsk	GO:0001957(intramembranous ossification);GO:0001968(fibronectin binding);GO:0004197(cysteine-type endopeptidase activity);GO:0005518(collagen binding);GO:0005576(extracellular region);GO:0005615(extracellular space);GO:0005654(nucleoplasm);GO:0005737(cytoplasm);GO:0005764(lysosome);GO:0005886(plasma membrane);GO:0006508(proteolysis);GO:0006590(thyroid hormone generation);GO:0006955(immune respons…	04142(Lysosome);04210(Apoptosis);04380(Osteoclast differentiation);04620(Toll-like receptor signaling pathway);05323(Rheumatoid arthritis)	K01371	EC:3.4.22.38	cathepsin K [Source:MGI Symbol;Acc:MGI:107823]	protein_coding	R_MMU_1442490(Collagen_degradation);R_MMU_73857(RNA_Polymerase_II_Transcription);R_MMU_168898(Toll_like_Receptor_Cascades);R_MMU_212436(Generic_Transcription_Pathway);R_MMU_8939242(RUNX1_regulates_transcription_of_genes_involved_in_differentiation_of_keratinocytes);R_MMU_1474244(Extracellular_matrix_organization);R_MMU_1474228(Degradation_of_the_extracellular_matrix);R_MMU_168256(Immune_System);R…	193.165	174.067	226.395	105.728	113.748	120.4	1.7466	0.804548	2.68825e-09	5.49025e-07	up	no
32103	0	chr12	-	21323517	21373593	ENSMUST00000145118	19	4427	ENSMUSG00000052593	Adam17	GO:0001666(response to hypoxia);GO:0001934(positive regulation of protein phosphorylation);GO:0002467(germinal center formation);GO:0002532(production of molecular mediator involved in inflammatory response);GO:0004175(endopeptidase activity);GO:0004222(metalloendopeptidase activity);GO:0004252(serine-type endopeptidase activity);GO:0005112(Notch binding);GO:0005138(interleukin-6 receptor binding…	04330(Notch signaling pathway);05010(Alzheimer disease)	K06059	EC:3.4.24.86	a disintegrin and metallopeptidase domain 17 [Source:MGI Symbol;Acc:MGI:1096335]	nonsense_mediated_decay	R_MMU_73887(Death_Receptor_Signalling);R_MMU_75893(TNF_signaling);R_MMU_193704(p75_NTR_receptor_mediated_signalling);R_MMU_162582(Signal_Transduction);R_MMU_193692(Regulated_proteolysis_of_p75NTR)	0	1.80881	0	0	0	0	6029.36	12.5578	2.68827e-09	5.49025e-07	up	yes
87868	0	chr3	+	95929386	95947269	ENSMUST00000168106	6	2890	ENSMUSG00000015749	Anp32e	GO:0000812(Swr1 complex);GO:0005515(protein binding);GO:0005634(nucleus);GO:0005737(cytoplasm);GO:0006325(chromatin organization);GO:0019212(phosphatase inhibitor activity);GO:0031410(cytoplasmic vesicle);GO:0042393(histone binding);GO:0042981(regulation of apoptotic process);GO:0043086(negative regulation of catalytic activity);GO:0043486(histone exchange)	NA	K18648	NA	acidic (leucine-rich) nuclear phosphoprotein 32 family, member E [Source:MGI Symbol;Acc:MGI:1913721]	protein_coding	NA	0	0	0	1.42257	0	0	0.000210885	-12.2113	2.7723e-09	5.64847e-07	down	yes
50230	0	chr15	-	75045013	75048830	ENSMUST00000065408	4	844	ENSMUSG00000079018	Ly6c1	GO:0005886(plasma membrane);GO:0009897(external side of plasma membrane);GO:0009986(cell surface);GO:0016020(membrane);GO:0030550(acetylcholine receptor inhibitor activity);GO:0031225(anchored component of membrane);GO:0033130(acetylcholine receptor binding);GO:0045202(synapse);GO:0095500(acetylcholine receptor signaling pathway);GO:2000272(negative regulation of signaling receptor activity)	NA	NA	NA	lymphocyte antigen 6 complex, locus C1 [Source:MGI Symbol;Acc:MGI:96882]	protein_coding	NA	234.046	166.279	275.806	72.3225	75.6221	103.965	2.68402	1.4244	2.78738e-09	5.66581e-07	up	yes
41808	0	chr13	-	103819607	103920295	ENSMUST00000191275	27	5552	ENSMUSG00000021709	Erbin	GO:0005102(signaling receptor binding);GO:0005176(ErbB-2 class receptor binding);GO:0005515(protein binding);GO:0005634(nucleus);GO:0005737(cytoplasm);GO:0005886(plasma membrane);GO:0006605(protein targeting);GO:0007165(signal transduction);GO:0016020(membrane);GO:0016323(basolateral plasma membrane);GO:0016607(nuclear speck);GO:0030054(cell junction);GO:0030056(hemidesmosome);GO:0031594(neuromus…	04621(NOD-like receptor signaling pathway)	K12796	NA	Erbb2 interacting protein [Source:MGI Symbol;Acc:MGI:1890169]	protein_coding	R_MMU_8980692(RHOA_GTPase_cycle);R_MMU_9013423(RAC3_GTPase_cycle);R_MMU_9652282(Drug_mediated_inhibition_of_ERBB2_signaling);R_MMU_9012999(RHO_GTPase_cycle);R_MMU_9013404(RAC2_GTPase_cycle);R_MMU_9013106(RHOC_GTPase_cycle);R_MMU_9013026(RHOB_GTPase_cycle);R_MMU_9716542(Signaling_by_Rho_GTPases,_Miro_GTPases_and_RHOBTB3);R_MMU_194315(Signaling_by_Rho_GTPases);R_MMU_9006934(Signaling_by_Receptor_Ty…	0.46856	0.318274	0.261266	1.13641	2.14767	3.27834	0.159713	-2.64645	2.82802e-09	5.73488e-07	down	yes
996	0	X	+	36874358	36883112	ENSMUST00000201117	6	552	ENSMUSG00000016308	Ube2a	GO:0000166(nucleotide binding);GO:0000209(protein polyubiquitination);GO:0000785(chromatin);GO:0000790(nuclear chromatin);GO:0001701(in utero embryonic development);GO:0001741(XY body);GO:0001835(blastocyst hatching);GO:0004842(ubiquitin-protein transferase activity);GO:0005515(protein binding);GO:0005524(ATP binding);GO:0006281(DNA repair);GO:0006974(cellular response to DNA damage stimulus);GO:…	04120(Ubiquitin mediated proteolysis)	K10573	EC:2.3.2.23	ubiquitin-conjugating enzyme E2A [Source:MGI Symbol;Acc:MGI:102959]	protein_coding	R_MMU_8852135(Protein_ubiquitination);R_MMU_597592(Post_translational_protein_modification);R_MMU_392499(Metabolism_of_proteins);R_MMU_168256(Immune_System);R_MMU_8866652(Synthesis_of_active_ubiquitin:_roles_of_E1_and_E2_enzymes);R_MMU_8866654(E3_ubiquitin_ligases_ubiquitinate_target_proteins);R_MMU_983168(Antigen_processing:_Ubiquitination_&_Proteasome_degradation);R_MMU_1280218(Adaptive_Immune_…	0	12.9761	0	0	0	0	43253.8	15.4005	2.84992e-09	5.76574e-07	up	yes
24583	0	chr11	-	51813460	51857396	ENSMUST00000109091	13	6099	ENSMUSG00000020387	Jade2	GO:0000123(histone acetyltransferase complex);GO:0000209(protein polyubiquitination);GO:0005515(protein binding);GO:0005654(nucleoplasm);GO:0016567(protein ubiquitination);GO:0016740(transferase activity);GO:0043966(histone H3 acetylation);GO:0043981(histone H4-K5 acetylation);GO:0043982(histone H4-K8 acetylation);GO:0043983(histone H4-K12 acetylation);GO:0046872(metal ion binding);GO:0050767(reg…	NA	K22155	EC:2.3.2.27	jade family PHD finger 2 [Source:MGI Symbol;Acc:MGI:1924151]	protein_coding	R_MMU_3214847(HATs_acetylate_histones);R_MMU_3247509(Chromatin_modifying_enzymes);R_MMU_4839726(Chromatin_organization)	1.12513	0	0	0	0	0	3750.43	11.8728	2.87e-09	5.77826e-07	up	yes
62052	0	chr17	+	35394126	35395632	ENSMUST00000174854	3	1156	ENSMUSG00000055413	H2-Q5	NA	NA	NA	NA	histocompatibility 2, Q region locus 5 [Source:MGI Symbol;Acc:MGI:95934]	retained_intron	NA	7.7714	8.18934	12.1991	2.58119	3.32238	1.74355	3.68241	1.88065	2.88057e-09	5.77826e-07	up	yes
63972	0	chr17	-	66336982	66449750	ENSMUST00000086693	14	7221	ENSMUSG00000052105	Mtcl1	GO:0000922(spindle pole);GO:0001578(microtubule bundle formation);GO:0005615(extracellular space);GO:0005737(cytoplasm);GO:0005856(cytoskeleton);GO:0005886(plasma membrane);GO:0008017(microtubule binding);GO:0010506(regulation of autophagy);GO:0016020(membrane);GO:0016324(apical plasma membrane);GO:0016327(apicolateral plasma membrane);GO:0016328(lateral plasma membrane);GO:0030496(midbody);GO:00…	NA	NA	NA	microtubule crosslinking factor 1 [Source:MGI Symbol;Acc:MGI:1915867]	protein_coding	NA	0	0	0.94777	0	0	0	3159.23	11.6254	2.88156e-09	5.77826e-07	up	yes
67527	0	chr18	-	63664100	63708794	ENSMUST00000238061	8	1326	ENSMUSG00000024583	Txnl1	GO:0000502(proteasome complex);GO:0005634(nucleus);GO:0005737(cytoplasm);GO:0005829(cytosol);GO:0015036(disulfide oxidoreductase activity);GO:0045454(cell redox homeostasis);GO:0055114(oxidation-reduction process)	NA	NA	NA	thioredoxin-like 1 [Source:MGI Symbol;Acc:MGI:1860078]	protein_coding	R_MMU_9706574(RHOBTB_GTPase_Cycle);R_MMU_9012999(RHO_GTPase_cycle);R_MMU_9696270(RND2_GTPase_cycle);R_MMU_9696273(RND1_GTPase_cycle);R_MMU_9013424(RHOV_GTPase_cycle);R_MMU_9013420(RHOU_GTPase_cycle);R_MMU_9716542(Signaling_by_Rho_GTPases,_Miro_GTPases_and_RHOBTB3);R_MMU_194315(Signaling_by_Rho_GTPases);R_MMU_9696264(RND3_GTPase_cycle);R_MMU_162582(Signal_Transduction);R_MMU_9013422(RHOBTB1_GTPase…	0	0	0	0	3.13403	0	9.57234e-05	-13.3508	2.88293e-09	5.77826e-07	down	yes
84241	0	chr3	-	18071950	18243338	ENSMUST00000035625	6	2166	ENSMUSG00000039519	Cyp7b1	GO:0004497(monooxygenase activity);GO:0005506(iron ion binding);GO:0005783(endoplasmic reticulum);GO:0005789(endoplasmic reticulum membrane);GO:0006629(lipid metabolic process);GO:0006694(steroid biosynthetic process);GO:0006699(bile acid biosynthetic process);GO:0007586(digestion);GO:0007613(memory);GO:0007623(circadian rhythm);GO:0008202(steroid metabolic process);GO:0008203(cholesterol metabol…	00120(Primary bile acid biosynthesis);00140(Steroid hormone biosynthesis)	K07430	EC:1.14.14.29	cytochrome P450, family 7, subfamily b, polypeptide 1 [Source:MGI Symbol;Acc:MGI:104978]	protein_coding	R_MMU_211897(Cytochrome_P450_arranged_by_substrate_type);R_MMU_556833(Metabolism_of_lipids);R_MMU_1430728(Metabolism);R_MMU_193368(Synthesis_of_bile_acids_and_bile_salts_via_7alpha_hydroxycholesterol);R_MMU_211976(Endogenous_sterols);R_MMU_211945(Phase_I_Functionalization_of_compounds);R_MMU_8957322(Metabolism_of_steroids);R_MMU_194068(Bile_acid_and_bile_salt_metabolism);R_MMU_211859(Biological_o…	41.7056	36.2281	51.9301	17.0087	21.6265	21.6703	2.15343	1.10664	2.89892e-09	5.79682e-07	up	yes
64345	0	chr17	+	74395621	74424009	ENSMUST00000179074	14	1938	ENSMUSG00000024069	Slc30a6	GO:0005385(zinc ion transmembrane transporter activity);GO:0005739(mitochondrion);GO:0005794(Golgi apparatus);GO:0005829(cytosol);GO:0006811(ion transport);GO:0006812(cation transport);GO:0006829(zinc ion transport);GO:0006895(Golgi to endosome transport);GO:0008324(cation transmembrane transporter activity);GO:0016020(membrane);GO:0016021(integral component of membrane);GO:0055085(transmembrane …	NA	K14693	NA	solute carrier family 30 (zinc transporter), member 6 [Source:MGI Symbol;Acc:MGI:2386741]	protein_coding	R_MMU_435354(Zinc_transporters);R_MMU_2980736(Peptide_hormone_metabolism);R_MMU_264876(Insulin_processing);R_MMU_425410(Metal_ion_SLC_transporters);R_MMU_392499(Metabolism_of_proteins);R_MMU_425407(SLC_mediated_transmembrane_transport);R_MMU_382551(Transport_of_small_molecules);R_MMU_425366(Transport_of_bile_salts_and_organic_acids,_metal_ions_and_amine_compounds);R_MMU_435368(Zinc_efflux_and_com…	0	0	3.49138	0	0	0	11637.9	13.5065	2.9608e-09	5.90686e-07	up	yes
132675	0	chr8	-	95719458	95807381	ENSMUST00000068452	48	8152	ENSMUSG00000036550	Cnot1	GO:0000122(negative regulation of transcription by RNA polymerase II);GO:0000288(nuclear-transcribed mRNA catabolic process, deadenylation-dependent decay);GO:0000932(P-body);GO:0001829(trophectodermal cell differentiation);GO:0004535(poly(A)-specific ribonuclease activity);GO:0005515(protein binding);GO:0005634(nucleus);GO:0005737(cytoplasm);GO:0005829(cytosol);GO:0006417(regulation of translati…	03018(RNA degradation)	K12604	NA	CCR4-NOT transcription complex, subunit 1 [Source:MGI Symbol;Acc:MGI:2442402]	protein_coding	R_MMU_429914(Deadenylation_dependent_mRNA_decay);R_MMU_73857(RNA_Polymerase_II_Transcription);R_MMU_212436(Generic_Transcription_Pathway);R_MMU_3700989(Transcriptional_Regulation_by_TP53);R_MMU_6791312(TP53_Regulates_Transcription_of_Cell_Cycle_Genes);R_MMU_6804115(TP53_regulates_transcription_of_additional_cell_cycle_genes_whose_exact_role_in_the_p53_pathway_remain_uncertain);R_MMU_8953854(Metab…	1.37634	0	0	0	0	0	4587.79	12.1636	2.98885e-09	5.94906e-07	up	yes
115103	0	chr6	-	143011733	143100071	ENSMUST00000203187	26	3494	ENSMUSG00000030279	C2cd5	GO:0001726(ruffle);GO:0005509(calcium ion binding);GO:0005544(calcium-dependent phospholipid binding);GO:0005737(cytoplasm);GO:0005829(cytosol);GO:0005886(plasma membrane);GO:0005938(cell cortex);GO:0006906(vesicle fusion);GO:0008289(lipid binding);GO:0010828(positive regulation of glucose transmembrane transport);GO:0015031(protein transport);GO:0016020(membrane);GO:0030659(cytoplasmic vesicle m…	NA	NA	NA	C2 calcium-dependent domain containing 5 [Source:MGI Symbol;Acc:MGI:1921991]	protein_coding	NA	0	0	0	0	1.14212	0	0.00026267	-11.8945	3.00284e-09	5.96314e-07	down	yes
54726	0	chr16	+	20141063	20232573	ENSMUST00000090052	30	5997	ENSMUSG00000041215	Yeats2	GO:0000122(negative regulation of transcription by RNA polymerase II);GO:0005634(nucleus);GO:0005671(Ada2/Gcn5/Ada3 transcription activator complex);GO:0006355(regulation of transcription, DNA-templated);GO:0017025(TBP-class protein binding);GO:0042393(histone binding);GO:0043966(histone H3 acetylation);GO:0045892(negative regulation of transcription, DNA-templated);GO:0072686(mitotic spindle);GO…	NA	NA	NA	YEATS domain containing 2 [Source:MGI Symbol;Acc:MGI:2447762]	protein_coding	NA	0	2.08358	0	0	0	0	6945.26	12.7618	3.01512e-09	5.97375e-07	up	yes
98177	0	chr4	-	154020588	154025966	ENSMUST00000143047	5	3373	ENSMUSG00000078350	Smim1	GO:0005886(plasma membrane);GO:0008150(biological_process);GO:0009986(cell surface);GO:0016020(membrane);GO:0016021(integral component of membrane);GO:0042803(protein homodimerization activity)	NA	NA	NA	small integral membrane protein 1 [Source:MGI Symbol;Acc:MGI:1916109]	protein_coding	NA	0	0	1.98377	0	0	0	6612.58	12.691	3.03138e-09	5.99219e-07	up	yes
96387	0	chr4	+	132639046	132724762	ENSMUST00000180250	16	5020	ENSMUSG00000028886	Eya3	GO:0003682(chromatin binding);GO:0004721(phosphoprotein phosphatase activity);GO:0004725(protein tyrosine phosphatase activity);GO:0005515(protein binding);GO:0005634(nucleus);GO:0005654(nucleoplasm);GO:0005667(transcription factor complex);GO:0005737(cytoplasm);GO:0005813(centrosome);GO:0006281(DNA repair);GO:0006302(double-strand break repair);GO:0006325(chromatin organization);GO:0006470(prote…	NA	NA	NA	EYA transcriptional coactivator and phosphatase 3 [Source:MGI Symbol;Acc:MGI:109339]	protein_coding	R_MMU_5693565(Recruitment_and_ATM_mediated_phosphorylation_of_repair_and_signaling_proteins_at_DNA_double_strand_breaks);R_MMU_5693532(DNA_Double_Strand_Break_Repair);R_MMU_5693606(DNA_Double_Strand_Break_Response);R_MMU_73894(DNA_Repair)	0	1.38474	0	0	0	0	4615.79	12.1724	3.04692e-09	6.00912e-07	up	yes
27455	0	chr11	+	82057823	82062955	ENSMUST00000000342	3	1082	ENSMUSG00000020676	Ccl11	GO:0001938(positive regulation of endothelial cell proliferation);GO:0002544(chronic inflammatory response);GO:0002548(monocyte chemotaxis);GO:0002551(mast cell chemotaxis);GO:0005125(cytokine activity);GO:0005576(extracellular region);GO:0005615(extracellular space);GO:0006935(chemotaxis);GO:0006954(inflammatory response);GO:0006955(immune response);GO:0007010(cytoskeleton organization);GO:00070…	04060(Cytokine-cytokine receptor interaction);04062(Chemokine signaling pathway);04657(IL-17 signaling pathway);05310(Asthma)	K16597	NA	chemokine (C-C motif) ligand 11 [Source:MGI Symbol;Acc:MGI:103576]	protein_coding	R_MMU_373076(Class_A/1_(Rhodopsin_like_receptors));R_MMU_380108(Chemokine_receptors_bind_chemokines);R_MMU_375276(Peptide_ligand_binding_receptors);R_MMU_500792(GPCR_ligand_binding);R_MMU_372790(Signaling_by_GPCR);R_MMU_388396(GPCR_downstream_signalling);R_MMU_162582(Signal_Transduction);R_MMU_418594(G_alpha_(i)_signalling_events)	17.4133	15.5595	28.4215	6.44091	6.99655	6.93468	3.01364	1.59151	3.0651e-09	6.03118e-07	up	yes
129783	0	chr8	+	40874948	40922070	ENSMUST00000117077	12	7626	ENSMUSG00000031596	Slc7a2	GO:0000064(L-ornithine transmembrane transporter activity);GO:0002537(nitric oxide production involved in inflammatory response);GO:0005886(plasma membrane);GO:0006809(nitric oxide biosynthetic process);GO:0006865(amino acid transport);GO:0015171(amino acid transmembrane transporter activity);GO:0015179(L-amino acid transmembrane transporter activity);GO:0015181(arginine transmembrane transporter…	NA	K13864	NA	solute carrier family 7 (cationic amino acid transporter, y+ system), member 2 [Source:MGI Symbol;Acc:MGI:99828]	protein_coding	R_MMU_425393(Transport_of_inorganic_cations/anions_and_amino_acids/oligopeptides);R_MMU_425407(SLC_mediated_transmembrane_transport);R_MMU_382551(Transport_of_small_molecules);R_MMU_352230(Amino_acid_transport_across_the_plasma_membrane)	0	1.20854	0	0	0	0	4028.48	11.976	3.1233e-09	6.1317e-07	up	yes
24957	0	chr11	+	58215028	58222779	ENSMUST00000108836	2	3459	ENSMUSG00000069874	Irgm2	GO:0000045(autophagosome assembly);GO:0000139(Golgi membrane);GO:0001934(positive regulation of protein phosphorylation);GO:0003924(GTPase activity);GO:0005525(GTP binding);GO:0005739(mitochondrion);GO:0005789(endoplasmic reticulum membrane);GO:0005794(Golgi apparatus);GO:0005829(cytosol);GO:0006952(defense response);GO:0009617(response to bacterium);GO:0010508(positive regulation of autophagy);G…	NA	NA	NA	immunity-related GTPase family M member 2 [Source:MGI Symbol;Acc:MGI:1926262]	protein_coding	NA	40.5788	32.9021	54.9333	17.1741	13.2955	18.8924	2.60148	1.37933	3.15757e-09	6.18489e-07	up	yes
139221	0	chr9	-	78479915	78480841	ENSMUST00000156988	3	745	ENSMUSG00000037742	Eef1a1	GO:0000049(tRNA binding);GO:0000166(nucleotide binding);GO:0003729(mRNA binding);GO:0003746(translation elongation factor activity);GO:0003924(GTPase activity);GO:0005515(protein binding);GO:0005516(calmodulin binding);GO:0005525(GTP binding);GO:0005634(nucleus);GO:0005730(nucleolus);GO:0005737(cytoplasm);GO:0005829(cytosol);GO:0005886(plasma membrane);GO:0006412(translation);GO:0006414(translati…	03013(RNA transport);05134(Legionellosis)	K03231	NA	eukaryotic translation elongation factor 1 alpha 1 [Source:MGI Symbol;Acc:MGI:1096881]	protein_coding	R_MMU_3371511(HSF1_activation);R_MMU_2262752(Cellular_responses_to_stress);R_MMU_156842(Eukaryotic_Translation_Elongation);R_MMU_72766(Translation);R_MMU_8953897(Cellular_responses_to_external_stimuli);R_MMU_597592(Post_translational_protein_modification);R_MMU_392499(Metabolism_of_proteins);R_MMU_3371556(Cellular_response_to_heat_stress);R_MMU_168256(Immune_System);R_MMU_6798695(Neutrophil_degra…	29.7558	27.5141	34.4817	61.0086	55.938	47.7684	0.557032	-0.844167	3.1748e-09	6.19625e-07	down	no
49974	0	chr15	-	66780864	66812593	ENSMUST00000100572	8	2626	ENSMUSG00000022372	Sla	GO:0004715(non-membrane spanning protein tyrosine kinase activity);GO:0005070(SH3/SH2 adaptor activity);GO:0005102(signaling receptor binding);GO:0005515(protein binding);GO:0005737(cytoplasm);GO:0005768(endosome);GO:0005925(focal adhesion);GO:0007169(transmembrane receptor protein tyrosine kinase signaling pathway);GO:0009966(regulation of signal transduction);GO:0030154(cell differentiation);GO…	NA	NA	NA	src-like adaptor [Source:MGI Symbol;Acc:MGI:104295]	protein_coding	R_MMU_168256(Immune_System);R_MMU_9706369(Negative_regulation_of_FLT3);R_MMU_1280215(Cytokine_Signaling_in_Immune_system);R_MMU_9607240(FLT3_Signaling)	0	0	0	0.509605	0.121005	0.271827	0.000332433	-11.5546	3.17775e-09	6.19625e-07	down	yes
96164	0	chr4	-	130164454	130174802	ENSMUST00000030560	13	2085	ENSMUSG00000028776	Tinagl1	GO:0005201(extracellular matrix structural constituent);GO:0005576(extracellular region);GO:0005615(extracellular space);GO:0005737(cytoplasm);GO:0005764(lysosome);GO:0006508(proteolysis);GO:0008234(cysteine-type peptidase activity);GO:0043236(laminin binding);GO:0062023(collagen-containing extracellular matrix)	NA	NA	NA	tubulointerstitial nephritis antigen-like 1 [Source:MGI Symbol;Acc:MGI:2137617]	nonsense_mediated_decay	NA	3.12041	0	0	0	0	0	10401.4	13.3445	3.20996e-09	6.24494e-07	up	yes
23825	0	chr11	-	32209587	32222280	ENSMUST00000146179	18	2805	ENSMUSG00000020282	Rhbdf1	GO:0000139(Golgi membrane);GO:0004252(serine-type endopeptidase activity);GO:0005783(endoplasmic reticulum);GO:0005789(endoplasmic reticulum membrane);GO:0005794(Golgi apparatus);GO:0006508(proteolysis);GO:0008283(cell population proliferation);GO:0016020(membrane);GO:0016021(integral component of membrane);GO:0016477(cell migration);GO:0042058(regulation of epidermal growth factor receptor signa…	NA	NA	NA	rhomboid 5 homolog 1 [Source:MGI Symbol;Acc:MGI:104328]	nonsense_mediated_decay	NA	0	0	4.13213	0	0	0	13773.8	13.7496	3.22609e-09	6.26217e-07	up	yes
137121	0	chr9	+	46012864	46222275	ENSMUST00000120463	24	4180	ENSMUSG00000034135	Sik3	GO:0000166(nucleotide binding);GO:0000287(magnesium ion binding);GO:0004672(protein kinase activity);GO:0004674(protein serine/threonine kinase activity);GO:0005524(ATP binding);GO:0006468(protein phosphorylation);GO:1904263(positive regulation of TORC1 signaling);GO:1904515(positive regulation of TORC2 signaling)	NA	K19009	EC:2.7.11.1	SIK family kinase 3 [Source:MGI Symbol;Acc:MGI:2446296]	protein_coding	NA	0	1.61463	0	0	0	0	5382.09	12.394	3.24186e-09	6.27865e-07	up	yes
27458	0	chr11	+	82115185	82116799	ENSMUST00000009329	3	511	ENSMUSG00000009185	Ccl8	GO:0002548(monocyte chemotaxis);GO:0005125(cytokine activity);GO:0005576(extracellular region);GO:0005615(extracellular space);GO:0006935(chemotaxis);GO:0006954(inflammatory response);GO:0006955(immune response);GO:0007165(signal transduction);GO:0007186(G protein-coupled receptor signaling pathway);GO:0008009(chemokine activity);GO:0008201(heparin binding);GO:0030593(neutrophil chemotaxis);GO:00…	04060(Cytokine-cytokine receptor interaction);04062(Chemokine signaling pathway)	K16596	NA	chemokine (C-C motif) ligand 8 [Source:MGI Symbol;Acc:MGI:101878]	protein_coding	NA	61.0861	52.9097	90.2811	18.1565	26.0415	24.9793	2.95294	1.56215	3.25524e-09	6.29043e-07	up	yes
3922	0	X	+	135885853	135891081	ENSMUST00000068755	5	2823	ENSMUSG00000072964	Bhlhb9	GO:0005634(nucleus);GO:0005654(nucleoplasm);GO:0005737(cytoplasm);GO:0005829(cytosol);GO:0007611(learning or memory);GO:0042803(protein homodimerization activity);GO:0043524(negative regulation of neuron apoptotic process);GO:0050769(positive regulation of neurogenesis);GO:0051965(positive regulation of synapse assembly);GO:0061003(positive regulation of dendritic spine morphogenesis)	NA	NA	NA	basic helix-loop-helix domain containing, class B9 [Source:MGI Symbol;Acc:MGI:1917487]	protein_coding	NA	0	0	4.07312	0	0	0	13577.1	13.7289	3.26474e-09	6.29466e-07	up	yes
100263	0	chr5	-	33640055	33652306	ENSMUST00000101354	7	1578	ENSMUSG00000004642	Slbp	GO:0003723(RNA binding);GO:0003729(mRNA binding);GO:0005634(nucleus);GO:0005654(nucleoplasm);GO:0005730(nucleolus);GO:0005737(cytoplasm);GO:0005829(cytosol);GO:0006397(mRNA processing);GO:0006398(mRNA 3'-end processing by stem-loop binding and cleavage);GO:0042802(identical protein binding);GO:0051028(mRNA transport);GO:0071204(histone pre-mRNA 3'end processing complex);GO:0071207(histone pre-mRN…	NA	K18710	NA	stem-loop binding protein [Source:MGI Symbol;Acc:MGI:108402]	protein_coding	R_MMU_77588(SLBP_Dependent_Processing_of_Replication_Dependent_Histone_Pre_mRNAs);R_MMU_72203(Processing_of_Capped_Intron_Containing_Pre_mRNA);R_MMU_73857(RNA_Polymerase_II_Transcription);R_MMU_159230(Transport_of_the_SLBP_Dependant_Mature_mRNA);R_MMU_73856(RNA_Polymerase_II_Transcription_Termination);R_MMU_8953854(Metabolism_of_RNA);R_MMU_74160(Gene_expression_(Transcription));R_MMU_75067(Proces…	0	4.24734	0	0	0	0	14157.8	13.7893	3.28734e-09	6.32409e-07	up	yes
124505	0	chr7	-	105895139	105953940	ENSMUST00000106766	2	8795	ENSMUSG00000078606	Gm4070	GO:0000166(nucleotide binding);GO:0003674(molecular_function);GO:0005525(GTP binding);GO:0005575(cellular_component);GO:0005634(nucleus);GO:0005737(cytoplasm);GO:0005829(cytosol);GO:0008150(biological_process)	NA	NA	NA	predicted gene 4070 [Source:MGI Symbol;Acc:MGI:3782245]	protein_coding	NA	11.8491	15.5343	20.2864	7.5267	4.65062	5.0878	2.76105	1.46522	3.31116e-09	6.35573e-07	up	yes
61838	0	chr17	-	34862605	34882100	ENSMUST00000025230	18	2641	ENSMUSG00000024371	C2	GO:0002376(immune system process);GO:0004252(serine-type endopeptidase activity);GO:0005576(extracellular region);GO:0005615(extracellular space);GO:0006508(proteolysis);GO:0006956(complement activation);GO:0006958(complement activation, classical pathway);GO:0007584(response to nutrient);GO:0008233(peptidase activity);GO:0008236(serine-type peptidase activity);GO:0016787(hydrolase activity);GO:0…	04610(Complement and coagulation cascades);05133(Pertussis);05150(Staphylococcus aureus infection);05322(Systemic lupus erythematosus)	K01332	EC:3.4.21.43	complement component 2 (within H-2S) [Source:MGI Symbol;Acc:MGI:88226]	protein_coding	R_MMU_977606(Regulation_of_Complement_cascade);R_MMU_174577(Activation_of_C3_and_C5);R_MMU_166663(Initial_triggering_of_complement);R_MMU_166658(Complement_cascade);R_MMU_168256(Immune_System);R_MMU_168249(Innate_Immune_System)	31.0216	31.4277	37.5667	14.7639	15.3841	19.6688	2.00767	1.00552	3.32854e-09	6.37489e-07	up	yes
91661	0	chr4	+	34614974	34660163	ENSMUST00000142045	20	1843	ENSMUSG00000028292	Rars2	GO:0000166(nucleotide binding);GO:0004812(aminoacyl-tRNA ligase activity);GO:0004814(arginine-tRNA ligase activity);GO:0005524(ATP binding);GO:0005737(cytoplasm);GO:0005739(mitochondrion);GO:0005759(mitochondrial matrix);GO:0006412(translation);GO:0006418(tRNA aminoacylation for protein translation);GO:0006420(arginyl-tRNA aminoacylation);GO:0016874(ligase activity);GO:0032543(mitochondrial trans…	00970(Aminoacyl-tRNA biosynthesis)	K01887	EC:6.1.1.19	arginyl-tRNA synthetase 2, mitochondrial [Source:MGI Symbol;Acc:MGI:1923596]	processed_transcript	NA	0	0	0	2.00956	0	0	0.000149286	-12.7096	3.46611e-09	6.62365e-07	down	yes
103728	0	chr5	+	110231004	110256651	ENSMUST00000086674	14	5025	ENSMUSG00000029501	Ankle2	GO:0005783(endoplasmic reticulum);GO:0005789(endoplasmic reticulum membrane);GO:0007049(cell cycle);GO:0007084(mitotic nuclear envelope reassembly);GO:0007417(central nervous system development);GO:0016020(membrane);GO:0016021(integral component of membrane);GO:0030176(integral component of endoplasmic reticulum membrane);GO:0035307(positive regulation of protein dephosphorylation);GO:0042326(neg…	NA	K21412	NA	ankyrin repeat and LEM domain containing 2 [Source:MGI Symbol;Acc:MGI:1261856]	protein_coding	R_MMU_9012999(RHO_GTPase_cycle);R_MMU_9013404(RAC2_GTPase_cycle);R_MMU_2995383(Initiation_of_Nuclear_Envelope_(NE)_Reformation);R_MMU_1640170(Cell_Cycle);R_MMU_69278(Cell_Cycle,_Mitotic);R_MMU_2995410(Nuclear_Envelope_(NE)_Reassembly);R_MMU_9716542(Signaling_by_Rho_GTPases,_Miro_GTPases_and_RHOBTB3);R_MMU_194315(Signaling_by_Rho_GTPases);R_MMU_68886(M_Phase);R_MMU_2555396(Mitotic_Metaphase_and_An…	0	0	0	0	0	0.689003	0.000435412	-11.1653	3.59855e-09	6.84737e-07	down	yes
50234	0	chr15	-	75045521	75048804	ENSMUST00000185200	4	540	ENSMUSG00000079018	Ly6c1	GO:0005886(plasma membrane);GO:0009897(external side of plasma membrane);GO:0009986(cell surface);GO:0016020(membrane);GO:0030550(acetylcholine receptor inhibitor activity);GO:0031225(anchored component of membrane);GO:0033130(acetylcholine receptor binding);GO:0045202(synapse);GO:0095500(acetylcholine receptor signaling pathway);GO:2000272(negative regulation of signaling receptor activity)	NA	NA	NA	lymphocyte antigen 6 complex, locus C1 [Source:MGI Symbol;Acc:MGI:96882]	protein_coding	NA	12.4754	15.1656	19.2443	4.94125	5.40819	6.2729	2.82061	1.49601	3.59907e-09	6.84737e-07	up	yes
4086	0	X	+	139217166	139238335	ENSMUST00000113042	4	4182	ENSMUSG00000042515	Pwwp3b	GO:0003674(molecular_function);GO:0008150(biological_process)	NA	NA	NA	PWWP domain containing 3B [Source:MGI Symbol;Acc:MGI:2445062]	protein_coding	NA	0	0	0	0.864229	0	0	0.00034713	-11.4922	3.63146e-09	6.89377e-07	down	yes
127465	0	chr7	-	141429752	141437638	ENSMUST00000124266	10	2568	ENSMUSG00000019082	Slc25a22	GO:0005313(L-glutamate transmembrane transporter activity);GO:0005347(ATP transmembrane transporter activity);GO:0005739(mitochondrion);GO:0005743(mitochondrial inner membrane);GO:0015183(L-aspartate transmembrane transporter activity);GO:0015293(symporter activity);GO:0015810(aspartate transmembrane transport);GO:0015813(L-glutamate transmembrane transport);GO:0015867(ATP transport);GO:0016020(m…	NA	K15107	NA	solute carrier family 25 (mitochondrial carrier, glutamate), member 22 [Source:MGI Symbol;Acc:MGI:1915517]	nonsense_mediated_decay	R_MMU_425393(Transport_of_inorganic_cations/anions_and_amino_acids/oligopeptides);R_MMU_425407(SLC_mediated_transmembrane_transport);R_MMU_382551(Transport_of_small_molecules);R_MMU_428643(Organic_anion_transporters)	0	2.45448	0	0	0	0	8181.59	12.9982	3.7459e-09	7.0954e-07	up	yes
13184	0	chr1	-	140085858	140183320	ENSMUST00000111977	21	4100	ENSMUSG00000026365	Cfh	GO:0001525(angiogenesis);GO:0001822(kidney development);GO:0001851(complement component C3b binding);GO:0001905(activation of membrane attack complex);GO:0002376(immune system process);GO:0005515(protein binding);GO:0005576(extracellular region);GO:0005615(extracellular space);GO:0005634(nucleus);GO:0005737(cytoplasm);GO:0005739(mitochondrion);GO:0005886(plasma membrane);GO:0006954(inflammatory r…	04610(Complement and coagulation cascades);05150(Staphylococcus aureus infection)	K04004	NA	complement component factor h [Source:MGI Symbol;Acc:MGI:88385]	protein_coding	R_MMU_977606(Regulation_of_Complement_cascade);R_MMU_166658(Complement_cascade);R_MMU_168256(Immune_System);R_MMU_168249(Innate_Immune_System)	0	1.51734	0	0	0	0	5057.79	12.3043	3.8612e-09	7.29775e-07	up	yes
98903	0	chr5	-	9118868	9161719	ENSMUST00000184159	17	3453	ENSMUSG00000042508	Dmtf1	GO:0000978(RNA polymerase II cis-regulatory region sequence-specific DNA binding);GO:0001228(DNA-binding transcription activator activity, RNA polymerase II-specific);GO:0003677(DNA binding);GO:0005634(nucleus);GO:0005654(nucleoplasm);GO:0005829(cytosol);GO:0007049(cell cycle);GO:0045944(positive regulation of transcription by RNA polymerase II)	NA	K21625	NA	cyclin D binding myb-like transcription factor 1 [Source:MGI Symbol;Acc:MGI:1344415]	nonsense_mediated_decay	NA	0	0	0	1.0312	0	0	0.000290923	-11.7471	3.96542e-09	7.47832e-07	down	yes
24965	0	chr11	-	58315216	58323113	ENSMUST00000108829	5	3094	ENSMUSG00000049755	Zfp672	GO:0000977(RNA polymerase II regulatory region sequence-specific DNA binding);GO:0003676(nucleic acid binding);GO:0003677(DNA binding);GO:0005634(nucleus);GO:0005654(nucleoplasm);GO:0006357(regulation of transcription by RNA polymerase II);GO:0046872(metal ion binding)	NA	NA	NA	zinc finger protein 672 [Source:MGI Symbol;Acc:MGI:2442105]	protein_coding	R_MMU_73857(RNA_Polymerase_II_Transcription);R_MMU_212436(Generic_Transcription_Pathway);R_MMU_74160(Gene_expression_(Transcription))	1.77689	1.68335	2.27944	4.7957	5.00173	3.6018	0.428359	-1.22311	3.98777e-09	7.48859e-07	down	yes
103932	0	chr5	-	112384354	112392213	ENSMUST00000031291	3	2678	ENSMUSG00000029348	Asphd2	GO:0003674(molecular_function);GO:0008150(biological_process);GO:0016020(membrane);GO:0016021(integral component of membrane);GO:0016491(oxidoreductase activity);GO:0018193(peptidyl-amino acid modification);GO:0046872(metal ion binding);GO:0051213(dioxygenase activity);GO:0055114(oxidation-reduction process)	NA	NA	NA	aspartate beta-hydroxylase domain containing 2 [Source:MGI Symbol;Acc:MGI:1920148]	protein_coding	NA	0.191823	0.232758	0.178413	0.601032	0.763105	0.758485	0.28408	-1.81563	3.98824e-09	7.48859e-07	down	yes
124973	0	chr7	-	112116017	112159057	ENSMUST00000033036	8	3359	ENSMUSG00000030772	Dkk3	GO:0005576(extracellular region);GO:0005615(extracellular space);GO:0007275(multicellular organism development);GO:0016055(Wnt signaling pathway);GO:0030178(negative regulation of Wnt signaling pathway);GO:0032348(negative regulation of aldosterone biosynthetic process);GO:0039706(co-receptor binding);GO:0045892(negative regulation of transcription, DNA-templated);GO:0048019(receptor antagonist a…	NA	NA	NA	dickkopf WNT signaling pathway inhibitor 3 [Source:MGI Symbol;Acc:MGI:1354952]	protein_coding	NA	6.73027	6.27559	9.79922	2.18347	3.30426	2.636	2.80722	1.48914	4.05656e-09	7.60031e-07	up	yes
136525	0	chr9	+	41579494	41592826	ENSMUST00000188774	2	3312	ENSMUSG00000074415	Mir100hg	NA	NA	NA	NA	Mir100 Mirlet7a-2 Mir125b-1 cluster host gene [Source:MGI Symbol;Acc:MGI:1920394]	lincRNA	NA	0	0	0	0	0	0.983614	0.000304998	-11.6789	4.11767e-09	7.697e-07	down	yes
100550	0	chr5	+	35757931	35884465	ENSMUST00000114210	20	3042	ENSMUSG00000029095	Ablim2	GO:0003779(actin binding);GO:0005737(cytoplasm);GO:0006351(transcription, DNA-templated);GO:0007010(cytoskeleton organization);GO:0015629(actin cytoskeleton);GO:0030016(myofibril);GO:0030032(lamellipodium assembly);GO:0030036(actin cytoskeleton organization);GO:0045944(positive regulation of transcription by RNA polymerase II);GO:0046872(metal ion binding);GO:0051015(actin filament binding)	04360(Axon guidance)	K07520	NA	actin-binding LIM protein 2 [Source:MGI Symbol;Acc:MGI:2385758]	nonsense_mediated_decay	NA	0	0	0	0	0	1.06728	0.000281089	-11.7967	4.1271e-09	7.697e-07	down	yes
97225	0	chr4	-	141066512	141078342	ENSMUST00000132906	8	1874	ENSMUSG00000028923	Necap2	GO:0003674(molecular_function);GO:0005886(plasma membrane);GO:0006897(endocytosis);GO:0015031(protein transport);GO:0016020(membrane);GO:0016192(vesicle-mediated transport);GO:0030125(clathrin vesicle coat);GO:0030665(clathrin-coated vesicle membrane);GO:0031410(cytoplasmic vesicle)	NA	K20069	NA	NECAP endocytosis associated 2 [Source:MGI Symbol;Acc:MGI:1913397]	processed_transcript	R_MMU_5653656(Vesicle_mediated_transport);R_MMU_8856825(Cargo_recognition_for_clathrin_mediated_endocytosis);R_MMU_199991(Membrane_Trafficking);R_MMU_8856828(Clathrin_mediated_endocytosis)	0	0	0	1.81951	0	0	0.00016488	-12.5663	4.13496e-09	7.697e-07	down	yes
82636	0	chr2	+	164316751	164318453	ENSMUST00000017144	4	535	ENSMUSG00000017000	Svs6	GO:0005615(extracellular space)	NA	NA	NA	seminal vesicle secretory protein 6 [Source:MGI Symbol;Acc:MGI:106178]	protein_coding	NA	0	0	0	0	6.34509	0	4.72807e-05	-14.3684	4.20515e-09	7.79849e-07	down	yes
20849	0	chr10	-	94790866	94944835	ENSMUST00000099337	31	7302	ENSMUSG00000074785	Plxnc1	GO:0002116(semaphorin receptor complex);GO:0005515(protein binding);GO:0005887(integral component of plasma membrane);GO:0007162(negative regulation of cell adhesion);GO:0007165(signal transduction);GO:0008360(regulation of cell shape);GO:0016020(membrane);GO:0016021(integral component of membrane);GO:0017154(semaphorin receptor activity);GO:0030334(regulation of cell migration);GO:0043087(regula…	04360(Axon guidance)	K06572	NA	plexin C1 [Source:MGI Symbol;Acc:MGI:1890127]	protein_coding	R_MMU_416700(Other_semaphorin_interactions);R_MMU_422475(Axon_guidance);R_MMU_373755(Semaphorin_interactions);R_MMU_9675108(Nervous_system_development);R_MMU_1266738(Developmental_Biology)	0.417739	0.296958	0.366525	1.25829	0.898933	0.901156	0.353528	-1.5001	4.20757e-09	7.79849e-07	down	yes
28557	0	chr11	+	97450160	97502400	ENSMUST00000107601	19	5450	ENSMUSG00000049807	Arhgap23	GO:0005096(GTPase activator activity);GO:0005515(protein binding);GO:0007165(signal transduction);GO:0043547(positive regulation of GTPase activity)	NA	K20315	NA	Rho GTPase activating protein 23 [Source:MGI Symbol;Acc:MGI:3697726]	protein_coding	R_MMU_8980692(RHOA_GTPase_cycle);R_MMU_9012999(RHO_GTPase_cycle);R_MMU_9716542(Signaling_by_Rho_GTPases,_Miro_GTPases_and_RHOBTB3);R_MMU_194315(Signaling_by_Rho_GTPases);R_MMU_162582(Signal_Transduction);R_MMU_9013149(RAC1_GTPase_cycle)	3.16213	2.42882	2.97493	1.15096	1.32141	0.785371	2.62939	1.39473	4.23602e-09	7.83436e-07	up	yes
28292	0	chr11	-	95274259	95310201	ENSMUST00000103159	13	3248	ENSMUSG00000038909	Kat7	GO:0000123(histone acetyltransferase complex);GO:0000775(chromosome, centromeric region);GO:0000790(nuclear chromatin);GO:0001779(natural killer cell differentiation);GO:0003688(DNA replication origin binding);GO:0004402(histone acetyltransferase activity);GO:0005634(nucleus);GO:0005654(nucleoplasm);GO:0005694(chromosome);GO:0005737(cytoplasm);GO:0005829(cytosol);GO:0006260(DNA replication);GO:00…	NA	K11307	EC:2.3.1.48	K(lysine) acetyltransferase 7 [Source:MGI Symbol;Acc:MGI:2182799]	protein_coding	R_MMU_3214847(HATs_acetylate_histones);R_MMU_3247509(Chromatin_modifying_enzymes);R_MMU_4839726(Chromatin_organization)	1.75767	0	0	0	0	0	5858.91	12.5164	4.25362e-09	7.85008e-07	up	yes
55375	0	chr16	-	31297156	31314594	ENSMUST00000023207	5	979	ENSMUSG00000022548	Apod	GO:0000302(response to reactive oxygen species);GO:0005576(extracellular region);GO:0005615(extracellular space);GO:0005737(cytoplasm);GO:0005783(endoplasmic reticulum);GO:0006006(glucose metabolic process);GO:0006629(lipid metabolic process);GO:0006869(lipid transport);GO:0007420(brain development);GO:0007568(aging);GO:0008289(lipid binding);GO:0010642(negative regulation of platelet-derived gro…	NA	K03098	NA	apolipoprotein D [Source:MGI Symbol;Acc:MGI:88056]	retained_intron	R_MMU_425407(SLC_mediated_transmembrane_transport);R_MMU_382551(Transport_of_small_molecules);R_MMU_804914(Transport_of_fatty_acids);R_MMU_425397(Transport_of_vitamins,_nucleosides,_and_related_molecules)	15.7785	8.41423	19.6004	3.91753	3.7207	2.82883	4.1839	2.06485	4.26388e-09	7.85219e-07	up	yes
30411	0	chr11	+	115780699	115799033	ENSMUST00000239299	31	5014	ENSMUSG00000020747	Tmem94	GO:0003674(molecular_function);GO:0008150(biological_process);GO:0016020(membrane);GO:0016021(integral component of membrane)	NA	NA	NA	transmembrane protein 94 [Source:MGI Symbol;Acc:MGI:1919197]	protein_coding	NA	0	0	0	0.70387	0	0	0.000426215	-11.1961	4.27603e-09	7.85778e-07	down	yes
4261	0	X	+	144317804	144374450	ENSMUST00000238864	27	4191	ENSMUSG00000041718	Alg13	GO:0003824(catalytic activity);GO:0004577(N-acetylglucosaminyldiphosphodolichol N-acetylglucosaminyltransferase activity);GO:0005783(endoplasmic reticulum);GO:0006488(dolichol-linked oligosaccharide biosynthetic process);GO:0006508(proteolysis);GO:0008152(metabolic process);GO:0008233(peptidase activity);GO:0008234(cysteine-type peptidase activity);GO:0016740(transferase activity);GO:0016757(tran…	00510(N-Glycan biosynthesis)	K07432	EC:2.4.1.141	asparagine-linked glycosylation 13 [Source:MGI Symbol;Acc:MGI:1914824]	protein_coding	NA	0	0	0	0	0.999199	0	0.00030024	-11.7016	4.41781e-09	8.10104e-07	down	yes
50807	0	chr15	-	77403789	77411135	ENSMUST00000081776	3	1530	ENSMUSG00000057346	Apol9a	GO:0005575(cellular_component);GO:0005576(extracellular region);GO:0006869(lipid transport);GO:0008150(biological_process);GO:0008289(lipid binding);GO:0042157(lipoprotein metabolic process)	NA	K14480	NA	apolipoprotein L 9a [Source:MGI Symbol;Acc:MGI:3606001]	protein_coding	R_MMU_5653656(Vesicle_mediated_transport);R_MMU_8957275(Post_translational_protein_phosphorylation);R_MMU_2173782(Binding_and_Uptake_of_Ligands_by_Scavenger_Receptors);R_MMU_597592(Post_translational_protein_modification);R_MMU_392499(Metabolism_of_proteins);R_MMU_2168880(Scavenging_of_heme_from_plasma);R_MMU_381426(Regulation_of_Insulin_like_Growth_Factor_(IGF)_transport_and_uptake_by_Insulin_li…	12.2299	11.6394	19.2371	2.52151	2.51083	4.83851	4.36704	2.12666	4.59143e-09	8.40154e-07	up	yes
120974	0	chr7	-	48866429	48881596	ENSMUST00000119223	13	3499	ENSMUSG00000046179	E2f8	GO:0000122(negative regulation of transcription by RNA polymerase II);GO:0000978(RNA polymerase II cis-regulatory region sequence-specific DNA binding);GO:0000981(DNA-binding transcription factor activity, RNA polymerase II-specific);GO:0000987(cis-regulatory region sequence-specific DNA binding);GO:0001217(DNA-binding transcription repressor activity);GO:0001227(DNA-binding transcription repress…	NA	K09391	NA	E2F transcription factor 8 [Source:MGI Symbol;Acc:MGI:1922038]	protein_coding	R_MMU_6804116(TP53_Regulates_Transcription_of_Genes_Involved_in_G1_Cell_Cycle_Arrest);R_MMU_73857(RNA_Polymerase_II_Transcription);R_MMU_212436(Generic_Transcription_Pathway);R_MMU_3700989(Transcriptional_Regulation_by_TP53);R_MMU_6791312(TP53_Regulates_Transcription_of_Cell_Cycle_Genes);R_MMU_74160(Gene_expression_(Transcription))	0.057565	0.613592	0.549778	0	0	0	4069.78	11.9907	4.80963e-09	8.78217e-07	up	yes
14877	0	chr1	-	173468485	173491041	ENSMUST00000160565	7	3047	ENSMUSG00000037849	Ifi206	GO:0000122(negative regulation of transcription by RNA polymerase II);GO:0000978(RNA polymerase II cis-regulatory region sequence-specific DNA binding);GO:0001227(DNA-binding transcription repressor activity, RNA polymerase II-specific);GO:0002218(activation of innate immune response);GO:0003690(double-stranded DNA binding);GO:0005634(nucleus);GO:0005654(nucleoplasm);GO:0005730(nucleolus);GO:0005…	NA	NA	NA	interferon activated gene 206 [Source:MGI Symbol;Acc:MGI:3646410]	protein_coding	NA	2.91146	3.73211	5.97391	1.36335	0.947832	0.890775	3.94055	1.9784	4.90085e-09	8.9298e-07	up	yes
58923	0	chr17	+	21735912	21748969	ENSMUST00000182603	6	4315	ENSMUSG00000061544	Zfp229	GO:0003676(nucleic acid binding);GO:0006355(regulation of transcription, DNA-templated);GO:0046872(metal ion binding)	05168(Herpes simplex virus 1 infection)	K09228	NA	zinc finger protein 229 [Source:MGI Symbol;Acc:MGI:2679295]	protein_coding	R_MMU_73857(RNA_Polymerase_II_Transcription);R_MMU_212436(Generic_Transcription_Pathway);R_MMU_74160(Gene_expression_(Transcription))	0	0	0	0.728785	0	0	0.000411644	-11.2463	4.92311e-09	8.93303e-07	down	yes
108384	0	chr6	+	29433276	29461883	ENSMUST00000101617	47	8939	ENSMUSG00000068699	Flnc	GO:0003779(actin binding);GO:0005515(protein binding);GO:0005737(cytoplasm);GO:0005829(cytosol);GO:0005856(cytoskeleton);GO:0005886(plasma membrane);GO:0008092(cytoskeletal protein binding);GO:0015629(actin cytoskeleton);GO:0016020(membrane);GO:0016528(sarcoplasm);GO:0030018(Z disc);GO:0030029(actin filament-based process);GO:0030506(ankyrin binding);GO:0042383(sarcolemma);GO:0042802(identical pr…	04010(MAPK signaling pathway);04510(Focal adhesion);05132(Salmonella infection);05205(Proteoglycans in cancer)	K04437	NA	filamin C, gamma [Source:MGI Symbol;Acc:MGI:95557]	protein_coding	R_MMU_446353(Cell_extracellular_matrix_interactions);R_MMU_446728(Cell_junction_organization);R_MMU_1500931(Cell_Cell_communication)	0	0	0	0.35478	0	0	0.000845594	-10.2077	4.92822e-09	8.93303e-07	down	yes
21610	0	chr10	-	117750621	117792664	ENSMUST00000218576	28	3092	ENSMUSG00000052798	Nup107	GO:0000775(chromosome, centromeric region);GO:0000776(kinetochore);GO:0000777(condensed chromosome kinetochore);GO:0000973(posttranscriptional tethering of RNA polymerase II gene DNA at nuclear periphery);GO:0005634(nucleus);GO:0005643(nuclear pore);GO:0005694(chromosome);GO:0006355(regulation of transcription, DNA-templated);GO:0006406(mRNA export from nucleus);GO:0006606(protein import into nuc…	03013(RNA transport)	K14301	NA	nucleoporin 107 [Source:MGI Symbol;Acc:MGI:2143854]	nonsense_mediated_decay	R_MMU_3301854(Nuclear_Pore_Complex_(NPC)_Disassembly);R_MMU_3371453(Regulation_of_HSF1_mediated_heat_shock_response);R_MMU_4551638(SUMOylation_of_chromatin_organization_proteins);R_MMU_72203(Processing_of_Capped_Intron_Containing_Pre_mRNA);R_MMU_69620(Cell_Cycle_Checkpoints);R_MMU_71387(Metabolism_of_carbohydrates);R_MMU_1430728(Metabolism);R_MMU_211000(Gene_Silencing_by_RNA);R_MMU_2262752(Cellul…	0	0	0	1.01359	0	0	0.000295979	-11.7222	4.93371e-09	8.93303e-07	down	yes
24264	0	chr11	+	49087034	49126445	ENSMUST00000203412	3	2767	ENSMUSG00000040328	Olfr56	GO:0004930(G protein-coupled receptor activity);GO:0004984(olfactory receptor activity);GO:0005886(plasma membrane);GO:0007165(signal transduction);GO:0007186(G protein-coupled receptor signaling pathway);GO:0007608(sensory perception of smell);GO:0016020(membrane);GO:0016021(integral component of membrane);GO:0050896(response to stimulus);GO:0050911(detection of chemical stimulus involved in sen…	04740(Olfactory transduction)	K04257	NA	olfactory receptor 56 [Source:MGI Symbol;Acc:MGI:1333785]	retained_intron	R_MMU_9709957(Sensory_Perception);R_MMU_381753(Olfactory_Signaling_Pathway)	2.33779	2.58855	4.50719	0.925599	0.695502	0.78978	3.9129	1.96824	4.96498e-09	8.9708e-07	up	yes
140103	0	chr9	+	99629542	99669256	ENSMUST00000078367	16	3981	ENSMUSG00000037784	Dzip1l	GO:0003676(nucleic acid binding);GO:0005515(protein binding);GO:0005737(cytoplasm);GO:0005814(centriole);GO:0005856(cytoskeleton);GO:0005929(cilium);GO:0005930(axoneme);GO:0007224(smoothened signaling pathway);GO:0021532(neural tube patterning);GO:0032880(regulation of protein localization);GO:0033365(protein localization to organelle);GO:0033504(floor plate development);GO:0036064(ciliary basal …	NA	K16470	NA	DAZ interacting protein 1-like [Source:MGI Symbol;Acc:MGI:1919757]	protein_coding	NA	0	0	0	0.779411	0	0	0.000384906	-11.3432	5.00563e-09	9.02531e-07	down	yes
10426	0	chr1	+	75192160	75199387	ENSMUST00000145459	13	2770	ENSMUSG00000026199	Ankzf1	GO:0003676(nucleic acid binding);GO:0005515(protein binding);GO:0005737(cytoplasm);GO:0046872(metal ion binding);GO:0070301(cellular response to hydrogen peroxide)	NA	NA	NA	ankyrin repeat and zinc finger domain containing 1 [Source:MGI Symbol;Acc:MGI:1098746]	nonsense_mediated_decay	NA	0	0	0	1.2219	0	0	0.00024552	-11.9919	5.06152e-09	9.10704e-07	down	yes
82956	0	chr2	-	167035793	167063015	ENSMUST00000048988	14	7218	ENSMUSG00000039501	Znfx1	GO:0003700(DNA-binding transcription factor activity);GO:0003723(RNA binding);GO:0005634(nucleus);GO:0006355(regulation of transcription, DNA-templated);GO:0008270(zinc ion binding);GO:0031048(chromatin silencing by small RNA);GO:0031380(nuclear RNA-directed RNA polymerase complex);GO:0031508(pericentric heterochromatin assembly);GO:0046872(metal ion binding)	NA	NA	NA	zinc finger, NFX1-type containing 1 [Source:MGI Symbol;Acc:MGI:2138982]	protein_coding	NA	25.9002	26.701	33.9496	16.827	15.6107	17.1828	1.74426	0.802612	5.14076e-09	9.23033e-07	up	no
92512	0	chr4	-	46536937	46566440	ENSMUST00000030021	13	4112	ENSMUSG00000028337	Coro2a	GO:0003779(actin binding);GO:0005515(protein binding);GO:0005903(brush border);GO:0017053(transcriptional repressor complex);GO:0051015(actin filament binding)	NA	K13887	NA	coronin, actin binding protein 2A [Source:MGI Symbol;Acc:MGI:1345966]	protein_coding	NA	0	0	0	0	0.748586	0	0.000400756	-11.285	5.16763e-09	9.2593e-07	down	yes
26767	0	chr11	-	74383487	74610915	ENSMUST00000047488	26	6382	ENSMUSG00000038807	Rap1gap2	GO:0005096(GTPase activator activity);GO:0005737(cytoplasm);GO:0005813(centrosome);GO:0005829(cytosol);GO:0005886(plasma membrane);GO:0008361(regulation of cell size);GO:0010977(negative regulation of neuron projection development);GO:0031965(nuclear membrane);GO:0043005(neuron projection);GO:0043547(positive regulation of GTPase activity);GO:0051056(regulation of small GTPase mediated signal tra…	NA	K17708	NA	RAP1 GTPase activating protein 2 [Source:MGI Symbol;Acc:MGI:3028623]	nonsense_mediated_decay	R_MMU_168256(Immune_System);R_MMU_392517(Rap1_signalling);R_MMU_1280218(Adaptive_Immune_System)	0	0	0	0	0	0.4573	0.000656024	-10.574	5.20908e-09	9.31421e-07	down	yes
29237	0	chr11	+	101448407	101458698	ENSMUST00000010502	7	1362	ENSMUSG00000010358	Ifi35	GO:0003674(molecular_function);GO:0005634(nucleus);GO:0008150(biological_process)	NA	NA	NA	interferon-induced protein 35 [Source:MGI Symbol;Acc:MGI:1917360]	protein_coding	NA	36.0963	40.8229	53.0447	17.9106	17.4153	22.3942	2.25162	1.17097	5.26126e-09	9.37231e-07	up	yes
4812	0	X	+	159708601	159974167	ENSMUST00000080394	17	2980	ENSMUSG00000040990	Sh3kbp1	GO:0005515(protein binding);GO:0005737(cytoplasm);GO:0005856(cytoskeleton);GO:0005911(cell-cell junction);GO:0005925(focal adhesion);GO:0006897(endocytosis);GO:0006915(apoptotic process);GO:0007010(cytoskeleton organization);GO:0007015(actin filament organization);GO:0008360(regulation of cell shape);GO:0016020(membrane);GO:0016477(cell migration);GO:0017124(SH3 domain binding);GO:0030054(cell ju…	04144(Endocytosis)	K12470	NA	SH3-domain kinase binding protein 1 [Source:MGI Symbol;Acc:MGI:1889583]	protein_coding	R_MMU_5653656(Vesicle_mediated_transport);R_MMU_177929(Signaling_by_EGFR);R_MMU_983705(Signaling_by_the_B_Cell_Receptor_(BCR));R_MMU_6807004(Negative_regulation_of_MET_activity);R_MMU_8856825(Cargo_recognition_for_clathrin_mediated_endocytosis);R_MMU_168256(Immune_System);R_MMU_199991(Membrane_Trafficking);R_MMU_422475(Axon_guidance);R_MMU_182971(EGFR_downregulation);R_MMU_9006934(Signaling_by_Re…	1.73535	0	0	0	0	0	5784.52	12.498	5.26333e-09	9.37231e-07	up	yes
133498	0	chr8	-	111311800	111338177	ENSMUST00000120432	11	1976	ENSMUSG00000012519	Mlkl	GO:0000166(nucleotide binding);GO:0004672(protein kinase activity);GO:0004706(JUN kinase kinase kinase activity);GO:0005515(protein binding);GO:0005524(ATP binding);GO:0005634(nucleus);GO:0005737(cytoplasm);GO:0005886(plasma membrane);GO:0006468(protein phosphorylation);GO:0007166(cell surface receptor signaling pathway);GO:0007256(activation of JNKK activity);GO:0007257(activation of JUN kinase …	04217(Necroptosis);04668(TNF signaling pathway)	K08849	EC:2.7.11.1	mixed lineage kinase domain-like [Source:MGI Symbol;Acc:MGI:1921818]	protein_coding	R_MMU_5675482(Regulation_of_necroptotic_cell_death);R_MMU_5218859(Regulated_Necrosis);R_MMU_5357801(Programmed_Cell_Death);R_MMU_382551(Transport_of_small_molecules);R_MMU_5213460(RIPK1_mediated_regulated_necrosis);R_MMU_2672351(Stimuli_sensing_channels);R_MMU_3295583(TRP_channels);R_MMU_983712(Ion_channel_transport)	25.8474	24.3573	20.4246	10.9919	11.5973	13.9818	1.9313	0.94957	5.3914e-09	9.57715e-07	up	no
71742	0	chr19	-	40294771	40513673	ENSMUST00000225148	22	2379	ENSMUSG00000025006	Sorbs1	GO:0005158(insulin receptor binding);GO:0005515(protein binding);GO:0005634(nucleus);GO:0005813(centrosome);GO:0005925(focal adhesion);GO:0030159(receptor signaling complex adaptor activity)	03320(PPAR signaling pathway);04520(Adherens junction);04910(Insulin signaling pathway)	K06086	NA	sorbin and SH3 domain containing 1 [Source:MGI Symbol;Acc:MGI:700014]	protein_coding	R_MMU_445355(Smooth_Muscle_Contraction);R_MMU_397014(Muscle_contraction)	0	0	0	0	1.27042	0	0.000236143	-12.0481	5.40307e-09	9.57715e-07	down	yes
80555	0	chr2	+	128862981	128897034	ENSMUST00000110324	9	3228	ENSMUSG00000027386	Fbln7	GO:0005509(calcium ion binding);GO:0005576(extracellular region);GO:0007155(cell adhesion);GO:0008201(heparin binding)	NA	K17342	NA	fibulin 7 [Source:MGI Symbol;Acc:MGI:1917620]	protein_coding	NA	0	0	0	0	0	0.882386	0.000339987	-11.5222	5.4117e-09	9.57715e-07	down	yes
25462	0	chr11	+	62029276	62223013	ENSMUST00000108709	14	6843	ENSMUSG00000042331	Specc1	GO:0001650(fibrillar center);GO:0003674(molecular_function);GO:0005515(protein binding);GO:0005634(nucleus);GO:0005654(nucleoplasm);GO:0005815(microtubule organizing center);GO:0005829(cytosol);GO:0016020(membrane);GO:0030036(actin cytoskeleton organization);GO:0031941(filamentous actin);GO:0043231(intracellular membrane-bounded organelle)	NA	K23028	NA	sperm antigen with calponin homology and coiled-coil domains 1 [Source:MGI Symbol;Acc:MGI:2442356]	protein_coding	NA	0	0	0	0	0.438747	0	0.000683765	-10.5142	5.42403e-09	9.57931e-07	down	yes
[truncated: 85,681 more rows]
